# Supplementary material for: Machine Learning Analysis of Public Procurement in the Dominican Republic: Impacts on Economic Efficiency and Inclusive Sourcing
Source: Preprints.org preprint supplement (doi:10.20944/preprints202310.0571.v1), 2023-10-10
Supplement: Supplementary file 1 [file supplementary]

CODE_PURCHASE_UNIT	PURCHASE_UNIT_NAME	MODALITY	TYPE_EXCEPTION	AMOUNT_CONTRACT_ESTIMATED	AMOUNT_CONTRACT_REAL	AMOUNT_CONTRACT_VARIANCE	DATE_PUBLICATION	DATE_AWARDED	TIME_DAYS_Processing	CONTRACT_STATUS	PROVIDER_CODE	PROVIDER_NAME	CONTRACT_PURPOSE	GENDER	TYPE_PERSON	DATE_PROVIDER_REGISTRATION	STATUS_PROVIDER	CLASSIFICATION_PROVIDER	LOCATION_PROVIDER
258	Industria Nacional de la Aguja	Price Comparison	ordinary process	2225155	1395198.18	-829956.82	01 15 2018	03 14 2018	58	Active	258	La Isabela, SRL	Goods	Male	Legal Person	11 29 2005	Outdated	Unknown	DISTRITO NACIONAL
258	Industria Nacional de la Aguja	Price Comparison	ordinary process	1520345.4	986539	-533806.4	02 7 2018	06 14 2018	127	Active	258	La Isabela, SRL	Goods	Male	Legal Person	11 29 2005	Outdated	Unknown	DISTRITO NACIONAL
258	Industria Nacional de la Aguja	Price Comparison	ordinary process	2225155	136586.3128	-2088568.687	01 15 2018	03 14 2018	58	Active	3329	Encajes La Rosario, SRL	Goods	Male	Legal Person	12 13 2006	Active	Large company	DISTRITO NACIONAL
139	Contraloría Gral de la República	Purchases Below the Threshold	ordinary process	6652	7849.36	1197.36	02 9 2018	02 9 2018	0	Closed	3329	Encajes La Rosario, SRL	Goods	Male	Legal Person	12 13 2006	Active	Large company	DISTRITO NACIONAL
251	Ministerio de Industria, Comercio y Mipymes	Purchases Below the Threshold	ordinary process	6779	7999.22	1220.22	02 14 2018	02 14 2018	0	Suspended	3329	Encajes La Rosario, SRL	Goods	Male	Legal Person	12 13 2006	Active	Large company	DISTRITO NACIONAL
258	Industria Nacional de la Aguja	Price Comparison	ordinary process	1520345.4	136002.5756	-1384342.824	02 7 2018	06 14 2018	127	In edition	3329	Encajes La Rosario, SRL	Unknown	Male	Legal Person	12 13 2006	Active	Large company	DISTRITO NACIONAL
632	Despacho de la Primera Dama	Purchases Below the Threshold	ordinary process	23800	27201.36	3401.36	03 1 2018	03 1 2018	0	Approved flow	3329	Encajes La Rosario, SRL	Goods	Male	Legal Person	12 13 2006	Active	Large company	DISTRITO NACIONAL
632	Despacho de la Primera Dama	Purchases Below the Threshold	ordinary process	6000	7249.9908	1249.9908	03 6 2018	03 7 2018	1	Approved flow	3329	Encajes La Rosario, SRL	Goods	Male	Legal Person	12 13 2006	Active	Large company	DISTRITO NACIONAL
632	Despacho de la Primera Dama	Purchases Below the Threshold	ordinary process	26550	32365.0872	5815.0872	04 26 2018	04 26 2018	0	Approved flow	3329	Encajes La Rosario, SRL	Goods	Male	Legal Person	12 13 2006	Active	Large company	DISTRITO NACIONAL
258	Industria Nacional de la Aguja	Minor Purchases	ordinary process	310897.55	313066.3388	2168.7888	04 25 2018	05 8 2018	13	Active	3329	Encajes La Rosario, SRL	Goods	Male	Legal Person	12 13 2006	Active	Large company	DISTRITO NACIONAL
632	Despacho de la Primera Dama	Purchases Below the Threshold	ordinary process	34005	33695.018	-309.982	06 5 2018	06 5 2018	0	Approved flow	3329	Encajes La Rosario, SRL	Goods	Male	Legal Person	12 13 2006	Active	Large company	DISTRITO NACIONAL
837	Parque Zoológico Nacional	Purchases Below the Threshold	ordinary process	53737	5348.2084	-48388.7916	06 21 2018	06 26 2018	5	Active	3329	Encajes La Rosario, SRL	Goods	Male	Legal Person	12 13 2006	Active	Large company	DISTRITO NACIONAL
171	Ejército de República Dominicana	Purchases Below the Threshold	ordinary process	2080	3550.03	1470.03	06 25 2018	06 25 2018	0	Active	3329	Encajes La Rosario, SRL	Goods	Male	Legal Person	12 13 2006	Active	Large company	DISTRITO NACIONAL
721	Ayuntamiento Municipal de Los Alcarrizos	Purchases Below the Threshold	ordinary process	7500	8500.0002	1000.0002	06 28 2018	06 29 2018	1	Active	3329	Encajes La Rosario, SRL	Goods	Male	Legal Person	12 13 2006	Active	Large company	DISTRITO NACIONAL
863	Instituto Técnico Superior Comunitario	Purchases Below the Threshold	ordinary process	24093.42	28430.2356	4336.8156	08 14 2018	08 17 2018	3	In edition	3329	Encajes La Rosario, SRL	Goods	Male	Legal Person	12 13 2006	Active	Large company	DISTRITO NACIONAL
632	Despacho de la Primera Dama	Purchases Below the Threshold	ordinary process	12000	12000.6	0.6	09 10 2018	09 10 2018	0	Closed	3329	Encajes La Rosario, SRL	Goods	Male	Legal Person	12 13 2006	Active	Large company	DISTRITO NACIONAL
667	Dirección General de Ordenamiento y Desarrollo Territorial	Purchases Below the Threshold	ordinary process	11906.72	14049.9296	2143.2096	11 8 2018	11 8 2018	0	Active	3329	Encajes La Rosario, SRL	Goods	Male	Legal Person	12 13 2006	Active	Large company	DISTRITO NACIONAL
862	HOSPITAL TRAUMATOLOGICO DR. NEY ARIAS LORA	Minor Purchases	ordinary process	170000	170014.4	14.4	11 6 2018	11 9 2018	3	Approved flow	3329	Encajes La Rosario, SRL	Goods	Male	Legal Person	12 13 2006	Active	Large company	DISTRITO NACIONAL
862	HOSPITAL TRAUMATOLOGICO DR. NEY ARIAS LORA	Purchases Below the Threshold	ordinary process	21254.23	25078.363	3824.133	12 3 2018	12 3 2018	0	In edition	3329	Encajes La Rosario, SRL	Goods	Male	Legal Person	12 13 2006	Active	Large company	DISTRITO NACIONAL
632	Despacho de la Primera Dama	Purchases Below the Threshold	ordinary process	15000	14400.012	-599.988	12 27 2018	12 27 2018	0	Approved flow	3329	Encajes La Rosario, SRL	Goods	Male	Legal Person	12 13 2006	Active	Large company	DISTRITO NACIONAL
139	Contraloría Gral de la República	Purchases Below the Threshold	ordinary process	5600	5600.0025	0.0025	02 5 2019	02 5 2019	0	Closed	3329	Encajes La Rosario, SRL	Goods	Male	Legal Person	12 13 2006	Active	Large company	DISTRITO NACIONAL
862	HOSPITAL TRAUMATOLOGICO DR. NEY ARIAS LORA	Purchases Below the Threshold	ordinary process	3279.63	3870.0814	590.4514	04 11 2019	04 15 2019	4	Active	3329	Encajes La Rosario, SRL	Goods	Male	Legal Person	12 13 2006	Active	Large company	DISTRITO NACIONAL
837	Parque Zoológico Nacional	Purchases Below the Threshold	ordinary process	59131	13765.4906	-45365.5094	05 15 2019	05 16 2019	1	Closed	3329	Encajes La Rosario, SRL	Goods	Male	Legal Person	12 13 2006	Active	Large company	DISTRITO NACIONAL
139	Contraloría Gral de la República	Purchases Below the Threshold	ordinary process	6240	6240.0288	0.0288	07 22 2019	07 22 2019	0	Active	3329	Encajes La Rosario, SRL	Goods	Male	Legal Person	12 13 2006	Active	Large company	DISTRITO NACIONAL
837	Parque Zoológico Nacional	Purchases Below the Threshold	ordinary process	46100	12451.099	-33648.901	07 31 2019	08 1 2019	1	Closed	3329	Encajes La Rosario, SRL	Goods	Male	Legal Person	12 13 2006	Active	Large company	DISTRITO NACIONAL
947	Cuerpo de Bomberos de Santo Domingo Este	Minor Purchases	ordinary process	24711.97	29160.1246	4448.1546	08 6 2019	08 12 2019	6	Active	3329	Encajes La Rosario, SRL	Goods	Male	Legal Person	12 13 2006	Active	Large company	DISTRITO NACIONAL
837	Parque Zoológico Nacional	Purchases Below the Threshold	ordinary process	74275	12750.726	-61524.274	11 8 2019	11 11 2019	3	Active	3329	Encajes La Rosario, SRL	Goods	Male	Legal Person	12 13 2006	Active	Large company	DISTRITO NACIONAL
141	Ministerio de Interior y Policía	Purchases Below the Threshold	ordinary process	21076.76	24870.5768	3793.8168	11 20 2019	11 20 2019	0	Closed	3329	Encajes La Rosario, SRL	Goods	Male	Legal Person	12 13 2006	Active	Large company	DISTRITO NACIONAL
632	Despacho de la Primera Dama	Purchases Below the Threshold	ordinary process	18100	18000.192	-99.808	12 19 2019	12 19 2019	0	Closed	3329	Encajes La Rosario, SRL	Goods	Male	Legal Person	12 13 2006	Active	Large company	DISTRITO NACIONAL
837	Parque Zoológico Nacional	Purchases Below the Threshold	ordinary process	46412	9690.337	-36721.663	02 6 2020	02 7 2020	1	Closed	3329	Encajes La Rosario, SRL	Goods	Male	Legal Person	12 13 2006	Active	Large company	DISTRITO NACIONAL
720	Dirección nacional de Ética e Integridad Gubernamental	Purchases Below the Threshold	ordinary process	29800	25280.0085	-4519.9915	02 18 2020	02 18 2020	0	Closed	3329	Encajes La Rosario, SRL	Goods	Male	Legal Person	12 13 2006	Active	Large company	DISTRITO NACIONAL
670	Instituto Nacional de Auxilios y Viviendas	Minor Purchases	ordinary process	315000	261000.3131	-53999.6869	02 18 2020	02 20 2020	2	Closed	3329	Encajes La Rosario, SRL	Goods	Male	Legal Person	12 13 2006	Active	Large company	DISTRITO NACIONAL
837	Parque Zoológico Nacional	Purchases Below the Threshold	ordinary process	24360	21615.49	-2744.51	11 2 2020	11 2 2020	0	Active	3329	Encajes La Rosario, SRL	Goods	Male	Legal Person	12 13 2006	Active	Large company	DISTRITO NACIONAL
947	Cuerpo de Bomberos de Santo Domingo Este	Purchases Below the Threshold	ordinary process	7627.05	8999.92	1372.87	03 12 2021	03 12 2021	0	Approved flow	3329	Encajes La Rosario, SRL	Goods	Male	Legal Person	12 13 2006	Active	Large company	DISTRITO NACIONAL
947	Cuerpo de Bomberos de Santo Domingo Este	Purchases Below the Threshold	ordinary process	5339.43	6300.52	961.09	03 12 2021	03 12 2021	0	Approved flow	3329	Encajes La Rosario, SRL	Goods	Male	Legal Person	12 13 2006	Active	Large company	DISTRITO NACIONAL
837	Parque Zoológico Nacional	Purchases Below the Threshold	ordinary process	58490	8135.23	-50354.77	04 15 2021	04 19 2021	4	Closed	3329	Encajes La Rosario, SRL	Goods	Male	Legal Person	12 13 2006	Active	Large company	DISTRITO NACIONAL
876	Instituto Nacional de Cancer 'Rosa E. Tavares'	Purchases Below the Threshold	ordinary process	9760	9539.73	-220.27	04 20 2021	04 21 2021	1	In edition	3329	Encajes La Rosario, SRL	Goods	Male	Legal Person	12 13 2006	Active	Large company	DISTRITO NACIONAL
837	Parque Zoológico Nacional	Purchases Below the Threshold	ordinary process	91292	9634.57	-81657.43	06 17 2022	06 17 2022	0	Closed	3329	Encajes La Rosario, SRL	Goods	Male	Legal Person	12 13 2006	Active	Large company	DISTRITO NACIONAL
227	Dirección General de Ganadería	Minor Purchases	ordinary process	1076143.48	53999.87	-1022143.61	08 11 2022	08 22 2022	11	Active	3329	Encajes La Rosario, SRL	Goods	Male	Legal Person	12 13 2006	Active	Large company	DISTRITO NACIONAL
837	Parque Zoológico Nacional	Purchases Below the Threshold	ordinary process	47210	10540.19	-36669.81	02 6 2023	02 9 2023	3	Active	3329	Encajes La Rosario, SRL	Goods	Male	Legal Person	12 13 2006	Active	Large company	DISTRITO NACIONAL
258	Industria Nacional de la Aguja	Price Comparison	ordinary process	2225155	693146.101	-1532008.899	01 15 2018	03 14 2018	58	Active	69056	Textiles Internacionales TRD, SRL	Goods	Male	Legal Person	07 19 2017	Active	Unknown	DISTRITO NACIONAL
258	Industria Nacional de la Aguja	Price Comparison	ordinary process	1520345.4	490000.7348	-1030344.665	02 7 2018	06 14 2018	127	Active	69056	Textiles Internacionales TRD, SRL	Goods	Male	Legal Person	07 19 2017	Active	Unknown	DISTRITO NACIONAL
983	Servicio Nacional de Salud	Exception Processes	emergency	31315320	1123997.2	-30191322.8	03 24 2020	03 27 2020	3	Closed	69056	Textiles Internacionales TRD, SRL	Goods	Male	Legal Person	07 19 2017	Active	Unknown	DISTRITO NACIONAL
223	Dirección General de Aduanas y Puertos	Purchases Below the Threshold	ordinary process	62500	64534.2	2034.2	01 2 2018	01 8 2018	6	Closed	1262	Copydom, SRL	Services	Male	Legal Person	02 16 2006	Active	Micro company	SANTO DOMINGO
223	Dirección General de Aduanas y Puertos	Purchases Below the Threshold	ordinary process	41200	48616	7416	01 11 2018	01 11 2018	0	Closed	1262	Copydom, SRL	Services	Male	Legal Person	02 16 2006	Active	Micro company	SANTO DOMINGO
223	Dirección General de Aduanas y Puertos	Purchases Below the Threshold	ordinary process	5000	5900	900	06 18 2018	06 18 2018	0	Closed	1262	Copydom, SRL	Goods	Male	Legal Person	02 16 2006	Active	Micro company	SANTO DOMINGO
223	Dirección General de Aduanas y Puertos	Purchases Below the Threshold	ordinary process	5000	4543	-457	09 10 2018	09 11 2018	1	Active	1262	Copydom, SRL	Services	Male	Legal Person	02 16 2006	Active	Micro company	SANTO DOMINGO
947	Cuerpo de Bomberos de Santo Domingo Este	Purchases Below the Threshold	ordinary process	3600	4248	648	04 5 2019	04 9 2019	4	Active	1262	Copydom, SRL	Goods	Male	Legal Person	02 16 2006	Active	Micro company	SANTO DOMINGO
131	Ministerio de Economía, Planificación y Desarrollo	Minor Purchases	ordinary process	550000	180540	-369460	04 1 2019	04 17 2019	16	Modified	1262	Copydom, SRL	Services	Male	Legal Person	02 16 2006	Active	Micro company	SANTO DOMINGO
947	Cuerpo de Bomberos de Santo Domingo Este	Minor Purchases	ordinary process	41500	48970	7470	05 6 2019	05 10 2019	4	Active	1262	Copydom, SRL	Goods	Male	Legal Person	02 16 2006	Active	Micro company	SANTO DOMINGO
947	Cuerpo de Bomberos de Santo Domingo Este	Purchases Below the Threshold	ordinary process	16600	19588	2988	05 14 2019	05 16 2019	2	Active	1262	Copydom, SRL	Goods	Male	Legal Person	02 16 2006	Active	Micro company	SANTO DOMINGO
947	Cuerpo de Bomberos de Santo Domingo Este	Purchases Below the Threshold	ordinary process	8400	9912	1512	05 17 2019	05 24 2019	7	Active	1262	Copydom, SRL	Goods	Male	Legal Person	02 16 2006	Active	Micro company	SANTO DOMINGO
223	Dirección General de Aduanas y Puertos	Purchases Below the Threshold	ordinary process	25000.05	20797.5	-4202.55	05 24 2019	05 27 2019	3	Closed	1262	Copydom, SRL	Goods	Male	Legal Person	02 16 2006	Active	Micro company	SANTO DOMINGO
947	Cuerpo de Bomberos de Santo Domingo Este	Purchases Below the Threshold	ordinary process	5500	6490	990	06 3 2019	06 5 2019	2	Active	1262	Copydom, SRL	Goods	Male	Legal Person	02 16 2006	Active	Micro company	SANTO DOMINGO
947	Cuerpo de Bomberos de Santo Domingo Este	Minor Purchases	ordinary process	22300	26314	4014	07 22 2019	07 24 2019	2	Active	1262	Copydom, SRL	Goods	Male	Legal Person	02 16 2006	Active	Micro company	SANTO DOMINGO
937	Instituto Nacional de Coordinación de Transplante	Purchases Below the Threshold	ordinary process	3500	3304	-196	08 21 2019	08 22 2019	1	Closed	1262	Copydom, SRL	Services	Male	Legal Person	02 16 2006	Active	Micro company	SANTO DOMINGO
937	Instituto Nacional de Coordinación de Transplante	Purchases Below the Threshold	ordinary process	4500	4130	-370	08 22 2019	08 23 2019	1	Closed	1262	Copydom, SRL	Goods	Male	Legal Person	02 16 2006	Active	Micro company	SANTO DOMINGO
947	Cuerpo de Bomberos de Santo Domingo Este	Purchases Below the Threshold	ordinary process	2800	3304	504	10 1 2019	10 2 2019	1	Active	1262	Copydom, SRL	Services	Male	Legal Person	02 16 2006	Active	Micro company	SANTO DOMINGO
210	Consejo Nacional de la Persona Envejeciente	Purchases Below the Threshold	ordinary process	132160	132160	0	10 22 2019	10 22 2019	0	Closed	1262	Copydom, SRL	Services	Male	Legal Person	02 16 2006	Active	Micro company	SANTO DOMINGO
947	Cuerpo de Bomberos de Santo Domingo Este	Minor Purchases	ordinary process	31000	36580	5580	02 28 2020	03 4 2020	5	Active	1262	Copydom, SRL	Goods	Male	Legal Person	02 16 2006	Active	Micro company	SANTO DOMINGO
947	Cuerpo de Bomberos de Santo Domingo Este	Purchases Below the Threshold	ordinary process	6400	7552	1152	06 12 2020	06 12 2020	0	Active	1262	Copydom, SRL	Goods	Male	Legal Person	02 16 2006	Active	Micro company	SANTO DOMINGO
947	Cuerpo de Bomberos de Santo Domingo Este	Minor Purchases	ordinary process	43675	51536.5	7861.5	06 12 2020	06 24 2020	12	Active	1262	Copydom, SRL	Goods	Male	Legal Person	02 16 2006	Active	Micro company	SANTO DOMINGO
210	Consejo Nacional de la Persona Envejeciente	Purchases Below the Threshold	ordinary process	84000	82600	-1400	09 23 2020	09 25 2020	2	Closed	1262	Copydom, SRL	Services	Male	Legal Person	02 16 2006	Active	Micro company	SANTO DOMINGO
131	Ministerio de Economía, Planificación y Desarrollo	Purchases Below the Threshold	ordinary process	70000	63720	-6280	12 2 2020	12 2 2020	0	Active	1262	Copydom, SRL	Services	Male	Legal Person	02 16 2006	Active	Micro company	SANTO DOMINGO
939	Ofic. Nac. de Ev. Sísmica y Vulnerabilidad de Infr. y Edificaciones	Purchases Below the Threshold	ordinary process	17110	17110	0	12 24 2020	12 28 2020	4	Closed	1262	Copydom, SRL	Goods	Male	Legal Person	02 16 2006	Active	Micro company	SANTO DOMINGO
183	DIRECCION GENERAL DE DRAGAS, PRESAS Y BALIZAMIENTO MG	Purchases Below the Threshold	ordinary process	6300	7434	1134	02 17 2021	02 17 2021	0	Closed	1262	Copydom, SRL	Goods	Male	Legal Person	02 16 2006	Active	Micro company	SANTO DOMINGO
947	Cuerpo de Bomberos de Santo Domingo Este	Purchases Below the Threshold	ordinary process	5800	6844	1044	03 2 2021	03 3 2021	1	Approved flow	1262	Copydom, SRL	Goods	Male	Legal Person	02 16 2006	Active	Micro company	SANTO DOMINGO
947	Cuerpo de Bomberos de Santo Domingo Este	Minor Purchases	ordinary process	23200	27376	4176	03 11 2021	03 17 2021	6	Active	1262	Copydom, SRL	Goods	Male	Legal Person	02 16 2006	Active	Micro company	SANTO DOMINGO
947	Cuerpo de Bomberos de Santo Domingo Este	Purchases Below the Threshold	ordinary process	10600	12508	1908	03 17 2021	03 18 2021	1	Active	1262	Copydom, SRL	Goods	Male	Legal Person	02 16 2006	Active	Micro company	SANTO DOMINGO
939	Ofic. Nac. de Ev. Sísmica y Vulnerabilidad de Infr. y Edificaciones	Purchases Below the Threshold	ordinary process	6537.2	6537.2	0	03 26 2021	03 26 2021	0	Closed	1262	Copydom, SRL	Goods	Male	Legal Person	02 16 2006	Active	Micro company	SANTO DOMINGO
131	Ministerio de Economía, Planificación y Desarrollo	Purchases Below the Threshold	ordinary process	130000	130980	980	05 11 2021	05 11 2021	0	Active	1262	Copydom, SRL	Services	Male	Legal Person	02 16 2006	Active	Micro company	SANTO DOMINGO
885	Centro Cardio-Neuro Oftalmologico y Trasplante	Purchases Below the Threshold	ordinary process	112483.5	112483.5	0	05 25 2021	05 25 2021	0	Active	1262	Copydom, SRL	Services	Male	Legal Person	02 16 2006	Active	Micro company	SANTO DOMINGO
885	Centro Cardio-Neuro Oftalmologico y Trasplante	Purchases Below the Threshold	ordinary process	88500	88500	0	05 27 2021	05 27 2021	0	Active	1262	Copydom, SRL	Services	Male	Legal Person	02 16 2006	Active	Micro company	SANTO DOMINGO
947	Cuerpo de Bomberos de Santo Domingo Este	Purchases Below the Threshold	ordinary process	8300	9794	1494	07 22 2021	07 23 2021	1	Active	1262	Copydom, SRL	Goods	Male	Legal Person	02 16 2006	Active	Micro company	SANTO DOMINGO
947	Cuerpo de Bomberos de Santo Domingo Este	Purchases Below the Threshold	ordinary process	15800	18644	2844	04 29 2022	08 23 2022	116	Closed	1262	Copydom, SRL	Goods	Male	Legal Person	02 16 2006	Active	Micro company	SANTO DOMINGO
210	Consejo Nacional de la Persona Envejeciente	Purchases Below the Threshold	ordinary process	160000	159300	-700	06 2 2022	06 2 2022	0	Modified	1262	Copydom, SRL	Services	Male	Legal Person	02 16 2006	Active	Micro company	SANTO DOMINGO
885	Centro Cardio-Neuro Oftalmologico y Trasplante	Purchases Below the Threshold	ordinary process	27500	32450	4950	06 21 2022	06 22 2022	1	Active	1262	Copydom, SRL	Goods	Male	Legal Person	02 16 2006	Active	Micro company	SANTO DOMINGO
947	Cuerpo de Bomberos de Santo Domingo Este	Purchases Below the Threshold	ordinary process	4650	5487	837	08 8 2022	08 8 2022	0	Closed	1262	Copydom, SRL	Goods	Male	Legal Person	02 16 2006	Active	Micro company	SANTO DOMINGO
947	Cuerpo de Bomberos de Santo Domingo Este	Purchases Below the Threshold	ordinary process	15800	18644	2844	08 25 2022	08 25 2022	0	Active	1262	Copydom, SRL	Goods	Male	Legal Person	02 16 2006	Active	Micro company	SANTO DOMINGO
947	Cuerpo de Bomberos de Santo Domingo Este	Purchases Below the Threshold	ordinary process	8500	10030	1530	08 30 2022	09 1 2022	2	Closed	1262	Copydom, SRL	Goods	Male	Legal Person	02 16 2006	Active	Micro company	SANTO DOMINGO
947	Cuerpo de Bomberos de Santo Domingo Este	Purchases Below the Threshold	ordinary process	2410	2843.8	433.8	08 30 2022	09 13 2022	14	Closed	1262	Copydom, SRL	Goods	Male	Legal Person	02 16 2006	Active	Micro company	SANTO DOMINGO
947	Cuerpo de Bomberos de Santo Domingo Este	Purchases Below the Threshold	ordinary process	13600	16048	2448	02 20 2023	02 20 2023	0	Active	1262	Copydom, SRL	Goods	Male	Legal Person	02 16 2006	Active	Micro company	SANTO DOMINGO
210	Consejo Nacional de la Persona Envejeciente	Purchases Below the Threshold	ordinary process	200000	199420	-580	02 24 2023	03 1 2023	5	Active	1262	Copydom, SRL	Goods	Male	Legal Person	02 16 2006	Active	Micro company	SANTO DOMINGO
947	Cuerpo de Bomberos de Santo Domingo Este	Purchases Below the Threshold	ordinary process	13600	16048	2448	03 20 2023	03 20 2023	0	Closed	1262	Copydom, SRL	Goods	Male	Legal Person	02 16 2006	Active	Micro company	SANTO DOMINGO
947	Cuerpo de Bomberos de Santo Domingo Este	Purchases Below the Threshold	ordinary process	18100	21358	3258	03 28 2023	03 28 2023	0	Closed	1262	Copydom, SRL	Goods	Male	Legal Person	02 16 2006	Active	Micro company	SANTO DOMINGO
223	Dirección General de Aduanas y Puertos	Purchases Below the Threshold	ordinary process	96715.7	106135.808	9420.108	01 2 2018	01 3 2018	1	Closed	571	Grupo Institucional del Caribe, SA	Goods	Female	Legal Person	11 29 2005	Active	Unknown	DISTRITO NACIONAL
223	Dirección General de Aduanas y Puertos	Purchases Below the Threshold	ordinary process	96715.7	106135.8092	9420.1092	01 2 2018	01 2 2018	0	Cancelled	571	Grupo Institucional del Caribe, SA	Goods	Female	Legal Person	11 29 2005	Active	Unknown	DISTRITO NACIONAL
747	Hospital Docente SEMMA	Minor Purchases	ordinary process	406000	431325.99	25325.99	08 15 2018	08 28 2018	13	Approved flow	571	Grupo Institucional del Caribe, SA	Goods	Female	Legal Person	11 29 2005	Active	Unknown	DISTRITO NACIONAL
747	Hospital Docente SEMMA	Purchases Below the Threshold	ordinary process	15000	20227.7016	5227.7016	08 21 2018	08 24 2018	3	Approved flow	571	Grupo Institucional del Caribe, SA	Goods	Female	Legal Person	11 29 2005	Active	Unknown	DISTRITO NACIONAL
581	Instituto Nacional de formación Técnico Profesional	Price Comparison	ordinary process	3786193	3392647.5	-393545.5	09 3 2018	11 2 2018	60	Active	571	Grupo Institucional del Caribe, SA	Goods	Female	Legal Person	11 29 2005	Active	Unknown	DISTRITO NACIONAL
218	Oficina Nacional de Estadísticas	Purchases Below the Threshold	ordinary process	50000	50641.47	641.47	09 13 2018	09 14 2018	1	Closed	571	Grupo Institucional del Caribe, SA	Goods	Female	Legal Person	11 29 2005	Active	Unknown	DISTRITO NACIONAL
863	Instituto Técnico Superior Comunitario	Price Comparison	ordinary process	1504350	69513.9888	-1434836.011	09 11 2018	10 25 2018	44	Active	571	Grupo Institucional del Caribe, SA	Goods	Female	Legal Person	11 29 2005	Active	Unknown	DISTRITO NACIONAL
863	Instituto Técnico Superior Comunitario	Minor Purchases	ordinary process	255000	87057.0016	-167942.9984	10 10 2018	10 25 2018	15	Rescinded	571	Grupo Institucional del Caribe, SA	Goods	Female	Legal Person	11 29 2005	Active	Unknown	DISTRITO NACIONAL
747	Hospital Docente SEMMA	Purchases Below the Threshold	ordinary process	15000	34059.4728	19059.4728	11 20 2018	11 23 2018	3	Approved flow	571	Grupo Institucional del Caribe, SA	Services	Female	Legal Person	11 29 2005	Active	Unknown	DISTRITO NACIONAL
581	Instituto Nacional de formación Técnico Profesional	Minor Purchases	ordinary process	861040	999222.6666	138182.6666	03 4 2019	03 8 2019	4	Closed	571	Grupo Institucional del Caribe, SA	Goods	Female	Legal Person	11 29 2005	Active	Unknown	DISTRITO NACIONAL
581	Instituto Nacional de formación Técnico Profesional	Price Comparison	ordinary process	3630000	3988149.84	358149.84	04 26 2019	06 18 2019	53	Active	571	Grupo Institucional del Caribe, SA	Goods	Female	Legal Person	11 29 2005	Active	Unknown	DISTRITO NACIONAL
747	Hospital Docente SEMMA	Purchases Below the Threshold	ordinary process	45000	34340.7376	-10659.2624	08 9 2019	08 20 2019	11	Approved flow	571	Grupo Institucional del Caribe, SA	Goods	Female	Legal Person	11 29 2005	Active	Unknown	DISTRITO NACIONAL
176	Instituto Nacional de Administración Pública	Purchases Below the Threshold	ordinary process	31299.84	36933.8112	5633.9712	09 30 2019	10 1 2019	1	Closed	571	Grupo Institucional del Caribe, SA	Goods	Female	Legal Person	11 29 2005	Active	Unknown	DISTRITO NACIONAL
863	Instituto Técnico Superior Comunitario	Minor Purchases	ordinary process	158000	153990	-4010	10 8 2019	10 18 2019	10	Active	571	Grupo Institucional del Caribe, SA	Goods	Female	Legal Person	11 29 2005	Active	Unknown	DISTRITO NACIONAL
946	Instituto Nacional de Atención Integral a la Primera Infancia	National Public Tender	ordinary process	43840889.28	11470357.73	-32370531.55	08 29 2019	11 22 2019	85	Active	571	Grupo Institucional del Caribe, SA	Goods	Female	Legal Person	11 29 2005	Active	Unknown	DISTRITO NACIONAL
863	Instituto Técnico Superior Comunitario	Purchases Below the Threshold	ordinary process	128000	127670.0292	-329.9708	10 23 2019	10 24 2019	1	Active	571	Grupo Institucional del Caribe, SA	Goods	Female	Legal Person	11 29 2005	Active	Unknown	DISTRITO NACIONAL
670	Instituto Nacional de Auxilios y Viviendas	Purchases Below the Threshold	ordinary process	20655.9	20655.9	0	11 12 2019	11 15 2019	3	Rescinded	571	Grupo Institucional del Caribe, SA	Goods	Female	Legal Person	11 29 2005	Active	Unknown	DISTRITO NACIONAL
670	Instituto Nacional de Auxilios y Viviendas	Purchases Below the Threshold	ordinary process	19268.93	19268.928	-0.002	11 13 2019	11 15 2019	2	Closed	571	Grupo Institucional del Caribe, SA	Goods	Female	Legal Person	11 29 2005	Active	Unknown	DISTRITO NACIONAL
140	Oficina de Ingenieros Supervisores de Obras del Estado B&S	Exception Processes	emergency	16560687	851405.4	-15709281.6	04 29 2020	05 20 2020	21	Modified	571	Grupo Institucional del Caribe, SA	Goods	Female	Legal Person	11 29 2005	Active	Unknown	DISTRITO NACIONAL
140	Oficina de Ingenieros Supervisores de Obras del Estado B&S	Exception Processes	emergency	16560687	1226014.2	-15334672.8	04 29 2020	05 9 2020	10	Modified	571	Grupo Institucional del Caribe, SA	Goods	Female	Legal Person	11 29 2005	Active	Unknown	DISTRITO NACIONAL
140	Oficina de Ingenieros Supervisores de Obras del Estado B&S	Exception Processes	emergency	16560687	1708286	-14852401	04 29 2020	05 9 2020	10	Modified	571	Grupo Institucional del Caribe, SA	Goods	Female	Legal Person	11 29 2005	Active	Unknown	DISTRITO NACIONAL
264	MINISTERIO DE EDUCACION SUPERIOR, CIENCIA Y TECNOLOGIA	Purchases Below the Threshold	ordinary process	114000	112784.4	-1215.6	12 30 2020	12 30 2020	0	In edition	571	Grupo Institucional del Caribe, SA	Goods	Female	Legal Person	11 29 2005	Active	Unknown	DISTRITO NACIONAL
223	Dirección General de Aduanas y Puertos	Exception Processes	air tickets, repairs and fuels	267250.9	315356.062	48105.162	01 2 2018	01 2 2018	0	Closed	34549	Retucar Auto Paint, SRL	Services	Male	Legal Person	09 11 2013	Active	Unknown	DISTRITO NACIONAL
223	Dirección General de Aduanas y Puertos	Exception Processes	air tickets, repairs and fuels	103938.41	122647.3238	18708.9138	01 10 2018	01 11 2018	1	Closed	34549	Retucar Auto Paint, SRL	Services	Male	Legal Person	09 11 2013	Active	Unknown	DISTRITO NACIONAL
223	Dirección General de Aduanas y Puertos	Exception Processes	air tickets, repairs and fuels	11045.5	13033.69	1988.19	01 22 2018	02 9 2018	18	Closed	34549	Retucar Auto Paint, SRL	Services	Male	Legal Person	09 11 2013	Active	Unknown	DISTRITO NACIONAL
223	Dirección General de Aduanas y Puertos	Exception Processes	air tickets, repairs and fuels	44870	52946.6	8076.6	02 8 2018	02 9 2018	1	Closed	34549	Retucar Auto Paint, SRL	Services	Male	Legal Person	09 11 2013	Active	Unknown	DISTRITO NACIONAL
223	Dirección General de Aduanas y Puertos	Exception Processes	air tickets, repairs and fuels	146556.79	172937.0122	26380.2222	02 16 2018	02 16 2018	0	Closed	34549	Retucar Auto Paint, SRL	Services	Male	Legal Person	09 11 2013	Active	Unknown	DISTRITO NACIONAL
223	Dirección General de Aduanas y Puertos	Exception Processes	air tickets, repairs and fuels	105935	125003.3	19068.3	02 16 2018	02 16 2018	0	Closed	34549	Retucar Auto Paint, SRL	Services	Male	Legal Person	09 11 2013	Active	Unknown	DISTRITO NACIONAL
223	Dirección General de Aduanas y Puertos	Exception Processes	air tickets, repairs and fuels	227663.26	174250.6944	-53412.5656	02 26 2018	02 28 2018	2	Closed	34549	Retucar Auto Paint, SRL	Services	Male	Legal Person	09 11 2013	Active	Unknown	DISTRITO NACIONAL
223	Dirección General de Aduanas y Puertos	Exception Processes	air tickets, repairs and fuels	164780.56	194441.0608	29660.5008	03 5 2018	03 12 2018	7	Closed	34549	Retucar Auto Paint, SRL	Services	Male	Legal Person	09 11 2013	Active	Unknown	DISTRITO NACIONAL
223	Dirección General de Aduanas y Puertos	Exception Processes	air tickets, repairs and fuels	33725	39795.5	6070.5	03 13 2018	03 13 2018	0	Closed	34549	Retucar Auto Paint, SRL	Services	Male	Legal Person	09 11 2013	Active	Unknown	DISTRITO NACIONAL
223	Dirección General de Aduanas y Puertos	Exception Processes	air tickets, repairs and fuels	79025	93249.5	14224.5	03 26 2018	04 3 2018	8	Closed	34549	Retucar Auto Paint, SRL	Services	Male	Legal Person	09 11 2013	Active	Unknown	DISTRITO NACIONAL
223	Dirección General de Aduanas y Puertos	Exception Processes	air tickets, repairs and fuels	226699.5	267505.41	40805.91	04 16 2018	04 16 2018	0	Closed	34549	Retucar Auto Paint, SRL	Services	Male	Legal Person	09 11 2013	Active	Unknown	DISTRITO NACIONAL
223	Dirección General de Aduanas y Puertos	Exception Processes	air tickets, repairs and fuels	229240	270503.2	41263.2	04 16 2018	04 16 2018	0	Closed	34549	Retucar Auto Paint, SRL	Services	Male	Legal Person	09 11 2013	Active	Unknown	DISTRITO NACIONAL
223	Dirección General de Aduanas y Puertos	Exception Processes	air tickets, repairs and fuels	297331.8	350851.524	53519.724	04 19 2018	04 20 2018	1	Closed	34549	Retucar Auto Paint, SRL	Services	Male	Legal Person	09 11 2013	Active	Unknown	DISTRITO NACIONAL
223	Dirección General de Aduanas y Puertos	Exception Processes	air tickets, repairs and fuels	199410	235303.8	35893.8	04 20 2018	04 20 2018	0	Closed	34549	Retucar Auto Paint, SRL	Services	Male	Legal Person	09 11 2013	Active	Unknown	DISTRITO NACIONAL
223	Dirección General de Aduanas y Puertos	Exception Processes	air tickets, repairs and fuels	117444.5	138584.51	21140.01	04 24 2018	04 24 2018	0	Closed	34549	Retucar Auto Paint, SRL	Services	Male	Legal Person	09 11 2013	Active	Unknown	DISTRITO NACIONAL
223	Dirección General de Aduanas y Puertos	Exception Processes	air tickets, repairs and fuels	75981.5	89658.17	13676.67	04 26 2018	04 26 2018	0	Closed	34549	Retucar Auto Paint, SRL	Services	Male	Legal Person	09 11 2013	Active	Unknown	DISTRITO NACIONAL
223	Dirección General de Aduanas y Puertos	Exception Processes	air tickets, repairs and fuels	57695	68080.1	10385.1	05 30 2018	05 30 2018	0	Closed	34549	Retucar Auto Paint, SRL	Services	Male	Legal Person	09 11 2013	Active	Unknown	DISTRITO NACIONAL
223	Dirección General de Aduanas y Puertos	Exception Processes	air tickets, repairs and fuels	9990	11788.2	1798.2	06 4 2018	06 4 2018	0	Closed	34549	Retucar Auto Paint, SRL	Services	Male	Legal Person	09 11 2013	Active	Unknown	DISTRITO NACIONAL
223	Dirección General de Aduanas y Puertos	Exception Processes	air tickets, repairs and fuels	146255	172580.9	26325.9	06 6 2018	06 6 2018	0	Closed	34549	Retucar Auto Paint, SRL	Services	Male	Legal Person	09 11 2013	Active	Unknown	DISTRITO NACIONAL
223	Dirección General de Aduanas y Puertos	Exception Processes	air tickets, repairs and fuels	5290	6242.2	952.2	06 13 2018	06 13 2018	0	Closed	34549	Retucar Auto Paint, SRL	Services	Male	Legal Person	09 11 2013	Active	Unknown	DISTRITO NACIONAL
223	Dirección General de Aduanas y Puertos	Exception Processes	air tickets, repairs and fuels	93930.95	110838.521	16907.571	06 28 2018	06 29 2018	1	Closed	34549	Retucar Auto Paint, SRL	Services	Male	Legal Person	09 11 2013	Active	Unknown	DISTRITO NACIONAL
223	Dirección General de Aduanas y Puertos	Exception Processes	air tickets, repairs and fuels	136105	160603.9	24498.9	07 9 2018	07 9 2018	0	Closed	34549	Retucar Auto Paint, SRL	Services	Male	Legal Person	09 11 2013	Active	Unknown	DISTRITO NACIONAL
223	Dirección General de Aduanas y Puertos	Exception Processes	air tickets, repairs and fuels	93265	110052.7	16787.7	07 20 2018	07 20 2018	0	Closed	34549	Retucar Auto Paint, SRL	Services	Male	Legal Person	09 11 2013	Active	Unknown	DISTRITO NACIONAL
223	Dirección General de Aduanas y Puertos	Exception Processes	air tickets, repairs and fuels	10000000	2000000	-8000000	08 21 2018	08 21 2018	0	Cancelled	34549	Retucar Auto Paint, SRL	Unknown	Male	Legal Person	09 11 2013	Active	Unknown	DISTRITO NACIONAL
223	Dirección General de Aduanas y Puertos	Exception Processes	air tickets, repairs and fuels	10000000	2000000	-8000000	08 21 2018	08 21 2018	0	Active	34549	Retucar Auto Paint, SRL	Services	Male	Legal Person	09 11 2013	Active	Unknown	DISTRITO NACIONAL
223	Dirección General de Aduanas y Puertos	National Public Tender	ordinary process	15000000	1500000	-13500000	02 14 2019	06 26 2019	132	Closed	34549	Retucar Auto Paint, SRL	Services	Male	Legal Person	09 11 2013	Active	Unknown	DISTRITO NACIONAL
637	Superintendencia de Electricidad	Exception Processes	air tickets, repairs and fuels	24939	29428.02	4489.02	01 2 2018	01 2 2018	0	Active	10224	Simon Anselmo Molina Pacheco	Services	Male	Natural Person	05 15 2009	Active	Micro company	DISTRITO NACIONAL
637	Superintendencia de Electricidad	Exception Processes	air tickets, repairs and fuels	71517	84390.06	12873.06	01 10 2018	01 10 2018	0	Active	10224	Simon Anselmo Molina Pacheco	Services	Male	Natural Person	05 15 2009	Active	Micro company	DISTRITO NACIONAL
637	Superintendencia de Electricidad	Exception Processes	air tickets, repairs and fuels	50470	59554.6	9084.6	01 10 2018	01 10 2018	0	Active	10224	Simon Anselmo Molina Pacheco	Services	Male	Natural Person	05 15 2009	Active	Micro company	DISTRITO NACIONAL
637	Superintendencia de Electricidad	Exception Processes	air tickets, repairs and fuels	6605	50273.9	43668.9	01 16 2018	01 16 2018	0	Active	10224	Simon Anselmo Molina Pacheco	Services	Male	Natural Person	05 15 2009	Active	Micro company	DISTRITO NACIONAL
637	Superintendencia de Electricidad	Exception Processes	air tickets, repairs and fuels	144460	170462.8	26002.8	01 19 2018	01 19 2018	0	Active	10224	Simon Anselmo Molina Pacheco	Services	Male	Natural Person	05 15 2009	Active	Micro company	DISTRITO NACIONAL
637	Superintendencia de Electricidad	Exception Processes	air tickets, repairs and fuels	6000	5809.14	-190.86	02 1 2018	02 1 2018	0	Approved flow	10224	Simon Anselmo Molina Pacheco	Services	Male	Natural Person	05 15 2009	Active	Micro company	DISTRITO NACIONAL
637	Superintendencia de Electricidad	Exception Processes	air tickets, repairs and fuels	12000	11210	-790	02 1 2018	02 1 2018	0	Approved flow	10224	Simon Anselmo Molina Pacheco	Works	Male	Natural Person	05 15 2009	Active	Micro company	DISTRITO NACIONAL
637	Superintendencia de Electricidad	Exception Processes	air tickets, repairs and fuels	3000	2478	-522	02 5 2018	02 5 2018	0	Active	10224	Simon Anselmo Molina Pacheco	Services	Male	Natural Person	05 15 2009	Active	Micro company	DISTRITO NACIONAL
637	Superintendencia de Electricidad	Exception Processes	air tickets, repairs and fuels	32000	31978	-22	02 22 2018	02 23 2018	1	Active	10224	Simon Anselmo Molina Pacheco	Services	Male	Natural Person	05 15 2009	Active	Micro company	DISTRITO NACIONAL
637	Superintendencia de Electricidad	Exception Processes	air tickets, repairs and fuels	14040	16567.2	2527.2	03 12 2018	03 12 2018	0	Active	10224	Simon Anselmo Molina Pacheco	Services	Male	Natural Person	05 15 2009	Active	Micro company	DISTRITO NACIONAL
197	Ministerio de la Presidencia	Exception Processes	air tickets, repairs and fuels	42000	41127.366	-872.634	03 13 2018	03 13 2018	0	Closed	10224	Simon Anselmo Molina Pacheco	Services	Male	Natural Person	05 15 2009	Active	Micro company	DISTRITO NACIONAL
637	Superintendencia de Electricidad	Exception Processes	air tickets, repairs and fuels	16500	16284	-216	03 14 2018	03 14 2018	0	Active	10224	Simon Anselmo Molina Pacheco	Services	Male	Natural Person	05 15 2009	Active	Micro company	DISTRITO NACIONAL
637	Superintendencia de Electricidad	Exception Processes	air tickets, repairs and fuels	54000	54557.3	557.3	03 16 2018	03 19 2018	3	Active	10224	Simon Anselmo Molina Pacheco	Services	Male	Natural Person	05 15 2009	Active	Micro company	DISTRITO NACIONAL
637	Superintendencia de Electricidad	Exception Processes	air tickets, repairs and fuels	67000	66252.28	-747.72	03 16 2018	03 19 2018	3	Active	10224	Simon Anselmo Molina Pacheco	Services	Male	Natural Person	05 15 2009	Active	Micro company	DISTRITO NACIONAL
207	Programa Supérate	Exception Processes	air tickets, repairs and fuels	75000	73974.2	-1025.8	04 5 2018	04 6 2018	1	Closed	10224	Simon Anselmo Molina Pacheco	Services	Male	Natural Person	05 15 2009	Active	Micro company	DISTRITO NACIONAL
637	Superintendencia de Electricidad	Exception Processes	air tickets, repairs and fuels	20000	19219.84	-780.16	04 5 2018	04 6 2018	1	Active	10224	Simon Anselmo Molina Pacheco	Services	Male	Natural Person	05 15 2009	Active	Micro company	DISTRITO NACIONAL
637	Superintendencia de Electricidad	Exception Processes	air tickets, repairs and fuels	11000	11145.1	145.1	04 9 2018	04 9 2018	0	Active	10224	Simon Anselmo Molina Pacheco	Services	Male	Natural Person	05 15 2009	Active	Micro company	DISTRITO NACIONAL
207	Programa Supérate	Exception Processes	air tickets, repairs and fuels	45000	41605.62	-3394.38	04 10 2018	04 10 2018	0	Closed	10224	Simon Anselmo Molina Pacheco	Services	Male	Natural Person	05 15 2009	Active	Micro company	DISTRITO NACIONAL
637	Superintendencia de Electricidad	Exception Processes	air tickets, repairs and fuels	12000	12036	36	04 13 2018	04 13 2018	0	Active	10224	Simon Anselmo Molina Pacheco	Services	Male	Natural Person	05 15 2009	Active	Micro company	DISTRITO NACIONAL
637	Superintendencia de Electricidad	Exception Processes	air tickets, repairs and fuels	26000	25228.4	-771.6	04 19 2018	04 19 2018	0	Active	10224	Simon Anselmo Molina Pacheco	Services	Male	Natural Person	05 15 2009	Active	Micro company	DISTRITO NACIONAL
637	Superintendencia de Electricidad	Exception Processes	air tickets, repairs and fuels	26000	24040.14	-1959.86	05 1 2018	05 1 2018	0	Approved flow	10224	Simon Anselmo Molina Pacheco	Services	Male	Natural Person	05 15 2009	Active	Micro company	DISTRITO NACIONAL
197	Ministerio de la Presidencia	Exception Processes	air tickets, repairs and fuels	80000	77863.48	-2136.52	05 18 2018	05 18 2018	0	Closed	10224	Simon Anselmo Molina Pacheco	Services	Male	Natural Person	05 15 2009	Active	Micro company	DISTRITO NACIONAL
637	Superintendencia de Electricidad	Exception Processes	air tickets, repairs and fuels	25000	25456.14	456.14	05 23 2018	05 24 2018	1	Active	10224	Simon Anselmo Molina Pacheco	Services	Male	Natural Person	05 15 2009	Active	Micro company	DISTRITO NACIONAL
207	Programa Supérate	Exception Processes	air tickets, repairs and fuels	67000	65289.4	-1710.6	05 30 2018	06 1 2018	2	Closed	10224	Simon Anselmo Molina Pacheco	Services	Male	Natural Person	05 15 2009	Active	Micro company	DISTRITO NACIONAL
637	Superintendencia de Electricidad	Exception Processes	air tickets, repairs and fuels	40000	38058.54	-1941.46	07 9 2018	07 9 2018	0	Active	10224	Simon Anselmo Molina Pacheco	Services	Male	Natural Person	05 15 2009	Active	Micro company	DISTRITO NACIONAL
637	Superintendencia de Electricidad	Exception Processes	air tickets, repairs and fuels	41000	40811.48	-188.52	07 11 2018	07 12 2018	1	Approved flow	10224	Simon Anselmo Molina Pacheco	Services	Male	Natural Person	05 15 2009	Active	Micro company	DISTRITO NACIONAL
637	Superintendencia de Electricidad	Exception Processes	air tickets, repairs and fuels	18000	16083.4	-1916.6	07 11 2018	07 12 2018	1	Active	10224	Simon Anselmo Molina Pacheco	Services	Male	Natural Person	05 15 2009	Active	Micro company	DISTRITO NACIONAL
637	Superintendencia de Electricidad	Exception Processes	air tickets, repairs and fuels	13000	13098	98	07 16 2018	07 16 2018	0	Active	10224	Simon Anselmo Molina Pacheco	Services	Male	Natural Person	05 15 2009	Active	Micro company	DISTRITO NACIONAL
637	Superintendencia de Electricidad	Exception Processes	air tickets, repairs and fuels	6000	5268.7	-731.3	07 17 2018	07 17 2018	0	Active	10224	Simon Anselmo Molina Pacheco	Services	Male	Natural Person	05 15 2009	Active	Micro company	DISTRITO NACIONAL
637	Superintendencia de Electricidad	Exception Processes	air tickets, repairs and fuels	17500	16838.6	-661.4	07 18 2018	07 18 2018	0	Active	10224	Simon Anselmo Molina Pacheco	Services	Male	Natural Person	05 15 2009	Active	Micro company	DISTRITO NACIONAL
203	Plan Asistencia Social de la Presidencia	Price Comparison	ordinary process	3824999.93	3811400	-13599.93	07 12 2018	07 26 2018	14	Rescinded	10224	Simon Anselmo Molina Pacheco	Services	Male	Natural Person	05 15 2009	Active	Micro company	DISTRITO NACIONAL
637	Superintendencia de Electricidad	Exception Processes	air tickets, repairs and fuels	43000	42456.4	-543.6	08 1 2018	08 1 2018	0	Active	10224	Simon Anselmo Molina Pacheco	Services	Male	Natural Person	05 15 2009	Active	Micro company	DISTRITO NACIONAL
203	Plan Asistencia Social de la Presidencia	Exception Processes	air tickets, repairs and fuels	3800000	3799999.996	-0.004	08 2 2018	08 3 2018	1	Closed	10224	Simon Anselmo Molina Pacheco	Services	Male	Natural Person	05 15 2009	Active	Micro company	DISTRITO NACIONAL
637	Superintendencia de Electricidad	Exception Processes	air tickets, repairs and fuels	3600	3540	-60	08 7 2018	08 7 2018	0	Active	10224	Simon Anselmo Molina Pacheco	Services	Male	Natural Person	05 15 2009	Active	Micro company	DISTRITO NACIONAL
637	Superintendencia de Electricidad	Exception Processes	air tickets, repairs and fuels	9000	9652.4	652.4	08 8 2018	08 8 2018	0	Active	10224	Simon Anselmo Molina Pacheco	Services	Male	Natural Person	05 15 2009	Active	Micro company	DISTRITO NACIONAL
637	Superintendencia de Electricidad	Exception Processes	air tickets, repairs and fuels	440000	43380.34	-396619.66	08 13 2018	08 13 2018	0	Active	10224	Simon Anselmo Molina Pacheco	Services	Male	Natural Person	05 15 2009	Active	Micro company	DISTRITO NACIONAL
207	Programa Supérate	Purchases Below the Threshold	ordinary process	12000	11516.8	-483.2	09 5 2018	09 6 2018	1	Approved flow	10224	Simon Anselmo Molina Pacheco	Services	Male	Natural Person	05 15 2009	Active	Micro company	DISTRITO NACIONAL
197	Ministerio de la Presidencia	Minor Purchases	ordinary process	312000	11999.7504	-300000.2496	01 11 2019	01 28 2019	17	Cancelled	10224	Simon Anselmo Molina Pacheco	Unknown	Male	Natural Person	05 15 2009	Active	Micro company	DISTRITO NACIONAL
197	Ministerio de la Presidencia	Minor Purchases	ordinary process	312000	11999.7504	-300000.2496	01 11 2019	01 28 2019	17	Closed	10224	Simon Anselmo Molina Pacheco	Goods	Male	Natural Person	05 15 2009	Active	Micro company	DISTRITO NACIONAL
203	Plan Asistencia Social de la Presidencia	Price Comparison	ordinary process	3949999.69	1893743.544	-2056256.146	05 3 2019	05 23 2019	20	Closed	10224	Simon Anselmo Molina Pacheco	Services	Male	Natural Person	05 15 2009	Active	Micro company	DISTRITO NACIONAL
809	Superintendencia de Valores	Purchases Below the Threshold	ordinary process	29100	28969	-131	07 8 2019	07 9 2019	1	Closed	10224	Simon Anselmo Molina Pacheco	Services	Male	Natural Person	05 15 2009	Active	Micro company	DISTRITO NACIONAL
207	Programa Supérate	Minor Purchases	ordinary process	400000	295500.0014	-104499.9986	08 15 2019	08 29 2019	14	Closed	10224	Simon Anselmo Molina Pacheco	Goods	Male	Natural Person	05 15 2009	Active	Micro company	DISTRITO NACIONAL
203	Plan Asistencia Social de la Presidencia	Price Comparison	ordinary process	3900000	5650599.991	1750599.991	10 10 2019	10 31 2019	21	Modified	10224	Simon Anselmo Molina Pacheco	Services	Male	Natural Person	05 15 2009	Active	Micro company	DISTRITO NACIONAL
197	Ministerio de la Presidencia	Purchases Below the Threshold	ordinary process	147000	147000	0	06 19 2020	06 19 2020	0	Closed	10224	Simon Anselmo Molina Pacheco	Services	Male	Natural Person	05 15 2009	Active	Micro company	DISTRITO NACIONAL
223	Dirección General de Aduanas y Puertos	Purchases Below the Threshold	ordinary process	23555	27794.9	4239.9	01 2 2018	01 2 2018	0	Closed	32166	Alutech, SRL	Goods	Female	Legal Person	06 19 2013	Active	Micro company	DISTRITO NACIONAL
223	Dirección General de Aduanas y Puertos	Purchases Below the Threshold	ordinary process	6720	7929.6	1209.6	01 24 2018	01 24 2018	0	Closed	32166	Alutech, SRL	Goods	Female	Legal Person	06 19 2013	Active	Micro company	DISTRITO NACIONAL
223	Dirección General de Aduanas y Puertos	Purchases Below the Threshold	ordinary process	40544	47841.92	7297.92	01 24 2018	01 25 2018	1	Closed	32166	Alutech, SRL	Goods	Female	Legal Person	06 19 2013	Active	Micro company	DISTRITO NACIONAL
223	Dirección General de Aduanas y Puertos	Purchases Below the Threshold	ordinary process	23400	17671.68	-5728.32	02 1 2018	02 21 2018	20	Closed	32166	Alutech, SRL	Goods	Female	Legal Person	06 19 2013	Active	Micro company	DISTRITO NACIONAL
223	Dirección General de Aduanas y Puertos	Purchases Below the Threshold	ordinary process	76800	90624	13824	02 9 2018	02 9 2018	0	Closed	32166	Alutech, SRL	Goods	Female	Legal Person	06 19 2013	Active	Micro company	DISTRITO NACIONAL
909	Comisión Nacional de Energía	Purchases Below the Threshold	ordinary process	7950	10140	2190	02 20 2018	02 20 2018	0	Closed	32166	Alutech, SRL	Goods	Female	Legal Person	06 19 2013	Active	Micro company	DISTRITO NACIONAL
223	Dirección General de Aduanas y Puertos	Purchases Below the Threshold	ordinary process	13360	15764.8	2404.8	03 13 2018	03 13 2018	0	Closed	32166	Alutech, SRL	Goods	Female	Legal Person	06 19 2013	Active	Micro company	DISTRITO NACIONAL
223	Dirección General de Aduanas y Puertos	Purchases Below the Threshold	ordinary process	92600	109268	16668	04 4 2018	04 4 2018	0	Closed	32166	Alutech, SRL	Goods	Female	Legal Person	06 19 2013	Active	Micro company	DISTRITO NACIONAL
223	Dirección General de Aduanas y Puertos	Minor Purchases	ordinary process	156001	159300	3299	04 4 2018	04 24 2018	20	Closed	32166	Alutech, SRL	Goods	Female	Legal Person	06 19 2013	Active	Micro company	DISTRITO NACIONAL
223	Dirección General de Aduanas y Puertos	Purchases Below the Threshold	ordinary process	21760	25676.8	3916.8	04 9 2018	04 10 2018	1	Closed	32166	Alutech, SRL	Goods	Female	Legal Person	06 19 2013	Active	Micro company	DISTRITO NACIONAL
223	Dirección General de Aduanas y Puertos	Purchases Below the Threshold	ordinary process	78713	92881.34	14168.34	04 9 2018	04 9 2018	0	Closed	32166	Alutech, SRL	Goods	Female	Legal Person	06 19 2013	Active	Micro company	DISTRITO NACIONAL
223	Dirección General de Aduanas y Puertos	Purchases Below the Threshold	ordinary process	46440	54799.2	8359.2	04 13 2018	04 13 2018	0	Closed	32166	Alutech, SRL	Goods	Female	Legal Person	06 19 2013	Active	Micro company	DISTRITO NACIONAL
909	Comisión Nacional de Energía	Purchases Below the Threshold	ordinary process	4000.02	1228.38	-2771.64	04 17 2018	04 17 2018	0	Closed	32166	Alutech, SRL	Goods	Female	Legal Person	06 19 2013	Active	Micro company	DISTRITO NACIONAL
909	Comisión Nacional de Energía	Purchases Below the Threshold	ordinary process	50000	21440.6	-28559.4	04 17 2018	04 18 2018	1	Closed	32166	Alutech, SRL	Goods	Female	Legal Person	06 19 2013	Active	Micro company	DISTRITO NACIONAL
223	Dirección General de Aduanas y Puertos	Minor Purchases	ordinary process	260000	164020	-95980	04 20 2018	05 14 2018	24	Closed	32166	Alutech, SRL	Goods	Female	Legal Person	06 19 2013	Active	Micro company	DISTRITO NACIONAL
223	Dirección General de Aduanas y Puertos	Purchases Below the Threshold	ordinary process	29900	29900	0	05 17 2018	05 18 2018	1	Closed	32166	Alutech, SRL	Services	Female	Legal Person	06 19 2013	Active	Micro company	DISTRITO NACIONAL
223	Dirección General de Aduanas y Puertos	Purchases Below the Threshold	ordinary process	26800	38279.2	11479.2	05 18 2018	07 3 2018	46	Closed	32166	Alutech, SRL	Goods	Female	Legal Person	06 19 2013	Active	Micro company	DISTRITO NACIONAL
223	Dirección General de Aduanas y Puertos	Purchases Below the Threshold	ordinary process	5760	6796.8	1036.8	05 22 2018	05 22 2018	0	Closed	32166	Alutech, SRL	Goods	Female	Legal Person	06 19 2013	Active	Micro company	DISTRITO NACIONAL
223	Dirección General de Aduanas y Puertos	Purchases Below the Threshold	ordinary process	72035	85001.3	12966.3	06 12 2018	06 12 2018	0	Closed	32166	Alutech, SRL	Goods	Female	Legal Person	06 19 2013	Active	Micro company	DISTRITO NACIONAL
223	Dirección General de Aduanas y Puertos	Minor Purchases	ordinary process	442750	363440	-79310	06 8 2018	07 5 2018	27	Closed	32166	Alutech, SRL	Goods	Female	Legal Person	06 19 2013	Active	Micro company	DISTRITO NACIONAL
223	Dirección General de Aduanas y Puertos	Purchases Below the Threshold	ordinary process	3800	4484	684	06 15 2018	06 15 2018	0	Closed	32166	Alutech, SRL	Goods	Female	Legal Person	06 19 2013	Active	Micro company	DISTRITO NACIONAL
223	Dirección General de Aduanas y Puertos	Purchases Below the Threshold	ordinary process	8300	9270.08	970.08	06 15 2018	06 15 2018	0	Closed	32166	Alutech, SRL	Goods	Female	Legal Person	06 19 2013	Active	Micro company	DISTRITO NACIONAL
223	Dirección General de Aduanas y Puertos	Minor Purchases	ordinary process	216000	260286.8	44286.8	07 5 2018	08 2 2018	28	Closed	32166	Alutech, SRL	Goods	Female	Legal Person	06 19 2013	Active	Micro company	DISTRITO NACIONAL
223	Dirección General de Aduanas y Puertos	Minor Purchases	ordinary process	307200	90624	-216576	07 12 2018	08 10 2018	29	Closed	32166	Alutech, SRL	Goods	Female	Legal Person	06 19 2013	Active	Micro company	DISTRITO NACIONAL
223	Dirección General de Aduanas y Puertos	Purchases Below the Threshold	ordinary process	74750	74750	0	07 17 2018	07 18 2018	1	Closed	32166	Alutech, SRL	Services	Female	Legal Person	06 19 2013	Active	Micro company	DISTRITO NACIONAL
223	Dirección General de Aduanas y Puertos	Purchases Below the Threshold	ordinary process	20160	23788.8	3628.8	07 19 2018	07 19 2018	0	Closed	32166	Alutech, SRL	Goods	Female	Legal Person	06 19 2013	Active	Micro company	DISTRITO NACIONAL
223	Dirección General de Aduanas y Puertos	Purchases Below the Threshold	ordinary process	41880	41880	0	08 21 2018	08 21 2018	0	Closed	32166	Alutech, SRL	Services	Female	Legal Person	06 19 2013	Active	Micro company	DISTRITO NACIONAL
843	Consejo Nacional para la Niñez y la Adolescencia	Price Comparison	ordinary process	1360004.28	1358190.62	-1813.66	09 10 2018	09 26 2018	16	Active	32166	Alutech, SRL	Goods	Female	Legal Person	06 19 2013	Active	Micro company	DISTRITO NACIONAL
223	Dirección General de Aduanas y Puertos	Purchases Below the Threshold	ordinary process	111840	131971.2	20131.2	10 25 2018	10 25 2018	0	Closed	32166	Alutech, SRL	Goods	Female	Legal Person	06 19 2013	Active	Micro company	DISTRITO NACIONAL
843	Consejo Nacional para la Niñez y la Adolescencia	Minor Purchases	ordinary process	649980	634368	-15612	10 22 2018	11 7 2018	16	Active	32166	Alutech, SRL	Goods	Female	Legal Person	06 19 2013	Active	Micro company	DISTRITO NACIONAL
223	Dirección General de Aduanas y Puertos	Purchases Below the Threshold	ordinary process	111550	131629	20079	10 29 2018	10 29 2018	0	Active	32166	Alutech, SRL	Goods	Female	Legal Person	06 19 2013	Active	Micro company	DISTRITO NACIONAL
223	Dirección General de Aduanas y Puertos	Purchases Below the Threshold	ordinary process	34900	34900	0	11 1 2018	11 2 2018	1	Active	32166	Alutech, SRL	Services	Female	Legal Person	06 19 2013	Active	Micro company	DISTRITO NACIONAL
223	Dirección General de Aduanas y Puertos	Purchases Below the Threshold	ordinary process	18820.12	22207.7416	3387.6216	11 2 2018	11 2 2018	0	Active	32166	Alutech, SRL	Goods	Female	Legal Person	06 19 2013	Active	Micro company	DISTRITO NACIONAL
843	Consejo Nacional para la Niñez y la Adolescencia	Purchases Below the Threshold	ordinary process	114460	114460	0	11 13 2018	11 13 2018	0	Active	32166	Alutech, SRL	Services	Female	Legal Person	06 19 2013	Active	Micro company	DISTRITO NACIONAL
223	Dirección General de Aduanas y Puertos	Purchases Below the Threshold	ordinary process	18500	21830	3330	11 21 2018	11 21 2018	0	Active	32166	Alutech, SRL	Goods	Female	Legal Person	06 19 2013	Active	Micro company	DISTRITO NACIONAL
843	Consejo Nacional para la Niñez y la Adolescencia	Purchases Below the Threshold	ordinary process	64888.2	64888.2	0	12 3 2018	12 6 2018	3	Active	32166	Alutech, SRL	Services	Female	Legal Person	06 19 2013	Active	Micro company	DISTRITO NACIONAL
223	Dirección General de Aduanas y Puertos	Purchases Below the Threshold	ordinary process	42135	49719.3	7584.3	12 4 2018	12 4 2018	0	Active	32166	Alutech, SRL	Goods	Female	Legal Person	06 19 2013	Active	Micro company	DISTRITO NACIONAL
843	Consejo Nacional para la Niñez y la Adolescencia	Minor Purchases	ordinary process	901000	949947.2	48947.2	12 10 2018	12 19 2018	9	Active	32166	Alutech, SRL	Services	Female	Legal Person	06 19 2013	Active	Micro company	DISTRITO NACIONAL
223	Dirección General de Aduanas y Puertos	Purchases Below the Threshold	ordinary process	13980	16496.4	2516.4	12 21 2018	12 26 2018	5	Active	32166	Alutech, SRL	Goods	Female	Legal Person	06 19 2013	Active	Micro company	DISTRITO NACIONAL
843	Consejo Nacional para la Niñez y la Adolescencia	Purchases Below the Threshold	ordinary process	116489.6	116489.6	0	12 27 2018	12 27 2018	0	Active	32166	Alutech, SRL	Services	Female	Legal Person	06 19 2013	Active	Micro company	DISTRITO NACIONAL
843	Consejo Nacional para la Niñez y la Adolescencia	Purchases Below the Threshold	ordinary process	18535.44	18535.44	0	12 28 2018	12 28 2018	0	Active	32166	Alutech, SRL	Goods	Female	Legal Person	06 19 2013	Active	Micro company	DISTRITO NACIONAL
843	Consejo Nacional para la Niñez y la Adolescencia	Purchases Below the Threshold	ordinary process	119941.12	119941.1	-0.02	01 3 2019	01 3 2019	0	Closed	32166	Alutech, SRL	Goods	Female	Legal Person	06 19 2013	Active	Micro company	DISTRITO NACIONAL
223	Dirección General de Aduanas y Puertos	Purchases Below the Threshold	ordinary process	17574.6	20738.028	3163.428	02 1 2019	02 1 2019	0	Closed	32166	Alutech, SRL	Goods	Female	Legal Person	06 19 2013	Active	Micro company	DISTRITO NACIONAL
843	Consejo Nacional para la Niñez y la Adolescencia	Price Comparison	ordinary process	3956515	2780186.2	-1176328.8	02 12 2019	03 8 2019	24	Cancelled	32166	Alutech, SRL	Unknown	Female	Legal Person	06 19 2013	Active	Micro company	DISTRITO NACIONAL
843	Consejo Nacional para la Niñez y la Adolescencia	Price Comparison	ordinary process	3956515	3059439.69	-897075.31	02 12 2019	03 12 2019	28	Closed	32166	Alutech, SRL	Goods	Female	Legal Person	06 19 2013	Active	Micro company	DISTRITO NACIONAL
843	Consejo Nacional para la Niñez y la Adolescencia	Price Comparison	ordinary process	3956515	3059439.69	-897075.31	02 12 2019	03 11 2019	27	Cancelled	32166	Alutech, SRL	Unknown	Female	Legal Person	06 19 2013	Active	Micro company	DISTRITO NACIONAL
843	Consejo Nacional para la Niñez y la Adolescencia	Price Comparison	ordinary process	3956515	3116691.52	-839823.48	02 12 2019	03 11 2019	27	Cancelled	32166	Alutech, SRL	Unknown	Female	Legal Person	06 19 2013	Active	Micro company	DISTRITO NACIONAL
843	Consejo Nacional para la Niñez y la Adolescencia	Price Comparison	ordinary process	3956515	2907436.81	-1049078.19	02 12 2019	03 8 2019	24	Cancelled	32166	Alutech, SRL	Unknown	Female	Legal Person	06 19 2013	Active	Micro company	DISTRITO NACIONAL
223	Dirección General de Aduanas y Puertos	Minor Purchases	ordinary process	767800	767800	0	02 21 2019	03 5 2019	12	Active	32166	Alutech, SRL	Services	Female	Legal Person	06 19 2013	Active	Micro company	DISTRITO NACIONAL
223	Dirección General de Aduanas y Puertos	Purchases Below the Threshold	ordinary process	42000	57820	15820	03 26 2019	03 28 2019	2	Closed	32166	Alutech, SRL	Goods	Female	Legal Person	06 19 2013	Active	Micro company	DISTRITO NACIONAL
843	Consejo Nacional para la Niñez y la Adolescencia	Purchases Below the Threshold	ordinary process	134903.5	134903.5	0	04 10 2019	04 11 2019	1	Closed	32166	Alutech, SRL	Services	Female	Legal Person	06 19 2013	Active	Micro company	DISTRITO NACIONAL
223	Dirección General de Aduanas y Puertos	Purchases Below the Threshold	ordinary process	109960	129752.8	19792.8	05 1 2019	05 1 2019	0	Closed	32166	Alutech, SRL	Goods	Female	Legal Person	06 19 2013	Active	Micro company	DISTRITO NACIONAL
843	Consejo Nacional para la Niñez y la Adolescencia	Purchases Below the Threshold	ordinary process	134048	134048	0	05 3 2019	05 3 2019	0	Closed	32166	Alutech, SRL	Services	Female	Legal Person	06 19 2013	Active	Micro company	DISTRITO NACIONAL
223	Dirección General de Aduanas y Puertos	Purchases Below the Threshold	ordinary process	47970	56604.6	8634.6	05 16 2019	05 16 2019	0	Closed	32166	Alutech, SRL	Goods	Female	Legal Person	06 19 2013	Active	Micro company	DISTRITO NACIONAL
843	Consejo Nacional para la Niñez y la Adolescencia	Purchases Below the Threshold	ordinary process	79650	79650	0	05 20 2019	05 20 2019	0	Closed	32166	Alutech, SRL	Goods	Female	Legal Person	06 19 2013	Active	Micro company	DISTRITO NACIONAL
264	MINISTERIO DE EDUCACION SUPERIOR, CIENCIA Y TECNOLOGIA	Minor Purchases	ordinary process	545201	715080	169879	07 10 2019	07 19 2019	9	Closed	32166	Alutech, SRL	Goods	Female	Legal Person	06 19 2013	Active	Micro company	DISTRITO NACIONAL
843	Consejo Nacional para la Niñez y la Adolescencia	Purchases Below the Threshold	ordinary process	129988.8	129988.8	0	07 18 2019	07 18 2019	0	Closed	32166	Alutech, SRL	Services	Female	Legal Person	06 19 2013	Active	Micro company	DISTRITO NACIONAL
843	Consejo Nacional para la Niñez y la Adolescencia	Purchases Below the Threshold	ordinary process	132160	132160	0	07 24 2019	07 24 2019	0	Closed	32166	Alutech, SRL	Services	Female	Legal Person	06 19 2013	Active	Micro company	DISTRITO NACIONAL
223	Dirección General de Aduanas y Puertos	Purchases Below the Threshold	ordinary process	17980	21216.4	3236.4	07 26 2019	07 26 2019	0	Closed	32166	Alutech, SRL	Goods	Female	Legal Person	06 19 2013	Active	Micro company	DISTRITO NACIONAL
843	Consejo Nacional para la Niñez y la Adolescencia	Purchases Below the Threshold	ordinary process	137000	137918.4	918.4	07 31 2019	07 31 2019	0	Active	32166	Alutech, SRL	Services	Female	Legal Person	06 19 2013	Active	Micro company	DISTRITO NACIONAL
843	Consejo Nacional para la Niñez y la Adolescencia	Price Comparison	ordinary process	3899943	1005442.6	-2894500.4	07 29 2019	08 22 2019	24	Active	32166	Alutech, SRL	Goods	Female	Legal Person	06 19 2013	Active	Micro company	DISTRITO NACIONAL
843	Consejo Nacional para la Niñez y la Adolescencia	Purchases Below the Threshold	ordinary process	137400	138768	1368	08 14 2019	08 15 2019	1	Active	32166	Alutech, SRL	Services	Female	Legal Person	06 19 2013	Active	Micro company	DISTRITO NACIONAL
223	Dirección General de Aduanas y Puertos	Purchases Below the Threshold	ordinary process	79001	78458.79	-542.21	09 4 2019	09 5 2019	1	Closed	32166	Alutech, SRL	Services	Female	Legal Person	06 19 2013	Active	Micro company	DISTRITO NACIONAL
223	Dirección General de Aduanas y Puertos	Exception Processes	single provider	186250	219775	33525	01 2 2018	01 3 2018	1	Closed	6359	Gadintermec, SRL	Services	Male	Legal Person	08 15 2007	Active	Medium company	DISTRITO NACIONAL
5	Ministerio de Obras Públicas y Comunicaciones	Minor Purchases	ordinary process	240366	236894.0152	-3471.9848	05 2 2018	05 11 2018	9	Closed	6359	Gadintermec, SRL	Goods	Male	Legal Person	08 15 2007	Active	Medium company	DISTRITO NACIONAL
248	Oficina Metropolitana de Servicios de Autobuses OMSA	Minor Purchases	ordinary process	102900	121422	18522	05 21 2018	05 30 2018	9	In edition	6359	Gadintermec, SRL	Goods	Male	Legal Person	08 15 2007	Active	Medium company	DISTRITO NACIONAL
582	Programa de Medicamentos Esenciales	Purchases Below the Threshold	ordinary process	16949.15	17700	750.85	06 14 2018	06 15 2018	1	Active	6359	Gadintermec, SRL	Goods	Male	Legal Person	08 15 2007	Active	Medium company	DISTRITO NACIONAL
178	Gabinete de Coordinación de Políticas Sociales	Purchases Below the Threshold	ordinary process	3540	3540	0	06 15 2018	06 15 2018	0	Closed	6359	Gadintermec, SRL	Goods	Male	Legal Person	08 15 2007	Active	Medium company	DISTRITO NACIONAL
5	Ministerio de Obras Públicas y Comunicaciones	Minor Purchases	ordinary process	160480	160480	0	06 18 2018	06 26 2018	8	Closed	6359	Gadintermec, SRL	Goods	Male	Legal Person	08 15 2007	Active	Medium company	DISTRITO NACIONAL
260	Ministerio de Medio Ambiente	Minor Purchases	ordinary process	763400	896800	133400	08 23 2018	09 10 2018	18	Closed	6359	Gadintermec, SRL	Goods	Male	Legal Person	08 15 2007	Active	Medium company	DISTRITO NACIONAL
260	Ministerio de Medio Ambiente	National Public Tender	ordinary process	9360000	10949720.15	1589720.15	07 31 2018	10 10 2018	71	Closed	6359	Gadintermec, SRL	Goods	Male	Legal Person	08 15 2007	Active	Medium company	DISTRITO NACIONAL
223	Dirección General de Aduanas y Puertos	Purchases Below the Threshold	ordinary process	68000	80240	12240	12 4 2018	12 5 2018	1	Closed	6359	Gadintermec, SRL	Goods	Male	Legal Person	08 15 2007	Active	Medium company	DISTRITO NACIONAL
260	Ministerio de Medio Ambiente	Minor Purchases	ordinary process	758756.4	895331.2068	136574.8068	01 18 2019	01 24 2019	6	Closed	6359	Gadintermec, SRL	Goods	Male	Legal Person	08 15 2007	Active	Medium company	DISTRITO NACIONAL
1	Ministerio de Relaciones Exteriores	Price Comparison	ordinary process	3392193.2	3189304	-202889.2	03 19 2019	12 30 2019	286	Active	6359	Gadintermec, SRL	Goods	Male	Legal Person	08 15 2007	Active	Medium company	DISTRITO NACIONAL
260	Ministerio de Medio Ambiente	Minor Purchases	ordinary process	404523.4	477337.612	72814.212	05 1 2019	05 6 2019	5	Closed	6359	Gadintermec, SRL	Goods	Male	Legal Person	08 15 2007	Active	Medium company	DISTRITO NACIONAL
223	Dirección General de Aduanas y Puertos	Purchases Below the Threshold	ordinary process	106320	125457.6	19137.6	05 16 2019	05 16 2019	0	Closed	6359	Gadintermec, SRL	Goods	Male	Legal Person	08 15 2007	Active	Medium company	DISTRITO NACIONAL
725	Consejo Nacional de Competitividad	Purchases Below the Threshold	ordinary process	118000	116820	-1180	06 12 2019	06 13 2019	1	Closed	6359	Gadintermec, SRL	Goods	Male	Legal Person	08 15 2007	Active	Medium company	DISTRITO NACIONAL
614	Ayuntamiento Santo Domingo Norte	Purchases Below the Threshold	ordinary process	120000	107734	-12266	08 9 2019	08 12 2019	3	In edition	6359	Gadintermec, SRL	Goods	Male	Legal Person	08 15 2007	Active	Medium company	DISTRITO NACIONAL
614	Ayuntamiento Santo Domingo Norte	Purchases Below the Threshold	ordinary process	17200	16727.68	-472.32	08 21 2019	08 26 2019	5	In edition	6359	Gadintermec, SRL	Goods	Male	Legal Person	08 15 2007	Active	Medium company	DISTRITO NACIONAL
582	Programa de Medicamentos Esenciales	Purchases Below the Threshold	ordinary process	20000	20886	886	09 9 2019	09 10 2019	1	Active	6359	Gadintermec, SRL	Goods	Male	Legal Person	08 15 2007	Active	Medium company	DISTRITO NACIONAL
260	Ministerio de Medio Ambiente	Price Comparison	ordinary process	3032000	3077440	45440	09 10 2019	09 30 2019	20	Closed	6359	Gadintermec, SRL	Goods	Male	Legal Person	08 15 2007	Active	Medium company	DISTRITO NACIONAL
582	Programa de Medicamentos Esenciales	Purchases Below the Threshold	ordinary process	22500	26137	3637	11 5 2019	11 5 2019	0	Active	6359	Gadintermec, SRL	Goods	Male	Legal Person	08 15 2007	Active	Medium company	DISTRITO NACIONAL
178	Gabinete de Coordinación de Políticas Sociales	Purchases Below the Threshold	ordinary process	15930	15930	0	11 15 2019	11 15 2019	0	Closed	6359	Gadintermec, SRL	Goods	Male	Legal Person	08 15 2007	Active	Medium company	DISTRITO NACIONAL
178	Gabinete de Coordinación de Políticas Sociales	Purchases Below the Threshold	ordinary process	5900	5900	0	12 3 2019	12 3 2019	0	Closed	6359	Gadintermec, SRL	Services	Male	Legal Person	08 15 2007	Active	Medium company	DISTRITO NACIONAL
614	Ayuntamiento Santo Domingo Norte	Purchases Below the Threshold	ordinary process	35000	34059.52	-940.48	01 22 2020	02 7 2020	16	In edition	6359	Gadintermec, SRL	Goods	Male	Legal Person	08 15 2007	Active	Medium company	DISTRITO NACIONAL
260	Ministerio de Medio Ambiente	Minor Purchases	ordinary process	220104.88	220105.0743	0.1943	01 23 2020	01 29 2020	6	Rescinded	6359	Gadintermec, SRL	Goods	Male	Legal Person	08 15 2007	Active	Medium company	DISTRITO NACIONAL
237	Ministerio de Educación	Purchases Below the Threshold	ordinary process	80471.28	80471.28	0	02 3 2020	02 4 2020	1	Closed	6359	Gadintermec, SRL	Goods	Male	Legal Person	08 15 2007	Active	Medium company	DISTRITO NACIONAL
237	Ministerio de Educación	Purchases Below the Threshold	ordinary process	61006	61006	0	02 3 2020	02 4 2020	1	Closed	6359	Gadintermec, SRL	Goods	Male	Legal Person	08 15 2007	Active	Medium company	DISTRITO NACIONAL
237	Ministerio de Educación	Purchases Below the Threshold	ordinary process	147028	147028	0	02 3 2020	02 4 2020	1	Closed	6359	Gadintermec, SRL	Goods	Male	Legal Person	08 15 2007	Active	Medium company	DISTRITO NACIONAL
5	Ministerio de Obras Públicas y Comunicaciones	Minor Purchases	ordinary process	213200	218064	4864	06 10 2020	07 6 2020	26	In edition	6359	Gadintermec, SRL	Goods	Male	Legal Person	08 15 2007	Active	Medium company	DISTRITO NACIONAL
862	HOSPITAL TRAUMATOLOGICO DR. NEY ARIAS LORA	Minor Purchases	ordinary process	250500	236011.8	-14488.2	10 8 2020	10 12 2020	4	Active	6359	Gadintermec, SRL	Goods	Male	Legal Person	08 15 2007	Active	Medium company	DISTRITO NACIONAL
223	Dirección General de Aduanas y Puertos	Purchases Below the Threshold	ordinary process	79200	93456	14256	11 20 2020	11 20 2020	0	Closed	6359	Gadintermec, SRL	Goods	Male	Legal Person	08 15 2007	Active	Medium company	DISTRITO NACIONAL
885	Centro Cardio-Neuro Oftalmologico y Trasplante	Minor Purchases	ordinary process	244000	241640	-2360	12 7 2020	12 17 2020	10	Active	6359	Gadintermec, SRL	Goods	Male	Legal Person	08 15 2007	Active	Medium company	DISTRITO NACIONAL
237	Ministerio de Educación	Purchases Below the Threshold	ordinary process	93456	93456	0	03 25 2021	03 29 2021	4	Closed	6359	Gadintermec, SRL	Unknown	Male	Legal Person	08 15 2007	Active	Medium company	DISTRITO NACIONAL
236	Dirección General de Pasaportes	Minor Purchases	ordinary process	549600	304440	-245160	04 5 2021	04 9 2021	4	Closed	6359	Gadintermec, SRL	Goods	Male	Legal Person	08 15 2007	Active	Medium company	DISTRITO NACIONAL
1154	Ministerio de la Vivienda, Hábitat y Edificaciones	Purchases Below the Threshold	ordinary process	32000	31152	-848	05 19 2022	05 19 2022	0	Closed	6359	Gadintermec, SRL	Goods	Male	Legal Person	08 15 2007	Active	Medium company	DISTRITO NACIONAL
260	Ministerio de Medio Ambiente	Price Comparison	ordinary process	4151000	3204880	-946120	06 20 2022	07 13 2022	23	Active	6359	Gadintermec, SRL	Goods	Male	Legal Person	08 15 2007	Active	Medium company	DISTRITO NACIONAL
1157	Unidad Técnica Ejecutora de Titulación de Terrenos del Estado	Purchases Below the Threshold	ordinary process	39100	39010.8	-89.2	12 9 2022	12 14 2022	5	Closed	6359	Gadintermec, SRL	Goods	Male	Legal Person	08 15 2007	Active	Medium company	DISTRITO NACIONAL
626	Coorporación de Acueducto y Alcantarillado de Santiago	Purchases Below the Threshold	ordinary process	93786.4	18502.4	-75284	04 25 2023	04 27 2023	2	Active	6359	Gadintermec, SRL	Goods	Male	Legal Person	08 15 2007	Active	Medium company	DISTRITO NACIONAL
626	Coorporación de Acueducto y Alcantarillado de Santiago	Purchases Below the Threshold	ordinary process	93786.4	18502.4	-75284	04 25 2023	04 27 2023	2	In edition	6359	Gadintermec, SRL	Unknown	Male	Legal Person	08 15 2007	Active	Medium company	DISTRITO NACIONAL
223	Dirección General de Aduanas y Puertos	Purchases Below the Threshold	ordinary process	11682	11682	0	05 10 2023	05 10 2023	0	Active	6359	Gadintermec, SRL	Goods	Male	Legal Person	08 15 2007	Active	Medium company	DISTRITO NACIONAL
223	Dirección General de Aduanas y Puertos	Minor Purchases	ordinary process	292050	292050	0	05 16 2023	05 22 2023	6	Active	6359	Gadintermec, SRL	Goods	Male	Legal Person	08 15 2007	Active	Medium company	DISTRITO NACIONAL
1157	Unidad Técnica Ejecutora de Titulación de Terrenos del Estado	Purchases Below the Threshold	ordinary process	118944	118944	0	06 14 2023	06 15 2023	1	Active	6359	Gadintermec, SRL	Goods	Male	Legal Person	08 15 2007	Active	Medium company	DISTRITO NACIONAL
202	Comunidad Digna	Purchases Below the Threshold	ordinary process	9000	10620	1620	01 2 2018	01 2 2018	0	Approved flow	5604	ABC Software, SRL	Goods	Male	Legal Person	05 30 2007	Active	Unknown	DISTRITO NACIONAL
223	Dirección General de Aduanas y Puertos	Exception Processes	single provider	900000	1062000	162000	03 5 2018	03 5 2018	0	Active	5604	ABC Software, SRL	Services	Male	Legal Person	05 30 2007	Active	Unknown	DISTRITO NACIONAL
134	Ministerio Administrativo de la Presidencia	Purchases Below the Threshold	ordinary process	82000	96288	14288	03 23 2018	04 2 2018	10	Closed	5604	ABC Software, SRL	Goods	Male	Legal Person	05 30 2007	Active	Unknown	DISTRITO NACIONAL
134	Ministerio Administrativo de la Presidencia	Purchases Below the Threshold	ordinary process	15000	17700	2700	08 9 2018	08 9 2018	0	Closed	5604	ABC Software, SRL	Goods	Male	Legal Person	05 30 2007	Active	Unknown	DISTRITO NACIONAL
202	Comunidad Digna	Purchases Below the Threshold	ordinary process	42480	42480	0	09 6 2018	09 6 2018	0	Active	5604	ABC Software, SRL	Services	Male	Legal Person	05 30 2007	Active	Unknown	DISTRITO NACIONAL
223	Dirección General de Aduanas y Puertos	Purchases Below the Threshold	ordinary process	100000	79777.44	-20222.56	10 11 2018	11 7 2018	27	Active	5604	ABC Software, SRL	Goods	Male	Legal Person	05 30 2007	Active	Unknown	DISTRITO NACIONAL
134	Ministerio Administrativo de la Presidencia	Purchases Below the Threshold	ordinary process	42000	48144	6144	11 29 2018	11 30 2018	1	Closed	5604	ABC Software, SRL	Goods	Male	Legal Person	05 30 2007	Active	Unknown	DISTRITO NACIONAL
134	Ministerio Administrativo de la Presidencia	Purchases Below the Threshold	ordinary process	41850	49383	7533	12 28 2018	12 28 2018	0	Closed	5604	ABC Software, SRL	Goods	Male	Legal Person	05 30 2007	Active	Unknown	DISTRITO NACIONAL
134	Ministerio Administrativo de la Presidencia	Purchases Below the Threshold	ordinary process	47528.5	56083.63	8555.13	02 28 2019	02 28 2019	0	Closed	5604	ABC Software, SRL	Goods	Male	Legal Person	05 30 2007	Active	Unknown	DISTRITO NACIONAL
134	Ministerio Administrativo de la Presidencia	Purchases Below the Threshold	ordinary process	62500	60180	-2320	03 15 2019	03 15 2019	0	Closed	5604	ABC Software, SRL	Goods	Male	Legal Person	05 30 2007	Active	Unknown	DISTRITO NACIONAL
223	Dirección General de Aduanas y Puertos	Minor Purchases	ordinary process	301000	402657.831	101657.831	04 2 2019	05 7 2019	35	Closed	5604	ABC Software, SRL	Goods	Male	Legal Person	05 30 2007	Active	Unknown	DISTRITO NACIONAL
223	Dirección General de Aduanas y Puertos	Minor Purchases	ordinary process	301000	402657.831	101657.831	04 2 2019	05 3 2019	31	Cancelled	5604	ABC Software, SRL	Goods	Male	Legal Person	05 30 2007	Active	Unknown	DISTRITO NACIONAL
223	Dirección General de Aduanas y Puertos	Minor Purchases	ordinary process	301000	366866.0238	65866.0238	04 2 2019	05 3 2019	31	Cancelled	5604	ABC Software, SRL	Goods	Male	Legal Person	05 30 2007	Active	Unknown	DISTRITO NACIONAL
223	Dirección General de Aduanas y Puertos	Minor Purchases	ordinary process	301000	1834206.75	1533206.75	04 2 2019	05 3 2019	31	Cancelled	5604	ABC Software, SRL	Unknown	Male	Legal Person	05 30 2007	Active	Unknown	DISTRITO NACIONAL
134	Ministerio Administrativo de la Presidencia	Exception Processes	single provider	125550	148149	22599	04 8 2019	04 8 2019	0	Closed	5604	ABC Software, SRL	Goods	Male	Legal Person	05 30 2007	Active	Unknown	DISTRITO NACIONAL
223	Dirección General de Aduanas y Puertos	Purchases Below the Threshold	ordinary process	110000	115000.322	5000.322	04 16 2019	04 23 2019	7	Closed	5604	ABC Software, SRL	Services	Male	Legal Person	05 30 2007	Active	Unknown	DISTRITO NACIONAL
223	Dirección General de Aduanas y Puertos	Exception Processes	single provider	1805400	531000	-1274400	05 7 2019	07 5 2019	59	Closed	5604	ABC Software, SRL	Services	Male	Legal Person	05 30 2007	Active	Unknown	DISTRITO NACIONAL
202	Comunidad Digna	Purchases Below the Threshold	ordinary process	24780	24780	0	06 13 2019	06 13 2019	0	In edition	5604	ABC Software, SRL	Unknown	Male	Legal Person	05 30 2007	Active	Unknown	DISTRITO NACIONAL
248	Oficina Metropolitana de Servicios de Autobuses OMSA	Minor Purchases	ordinary process	497349.93	584100	86750.07	08 21 2019	08 23 2019	2	Closed	5604	ABC Software, SRL	Services	Male	Legal Person	05 30 2007	Active	Unknown	DISTRITO NACIONAL
134	Ministerio Administrativo de la Presidencia	Purchases Below the Threshold	ordinary process	102000	120360	18360	12 23 2019	12 23 2019	0	Closed	5604	ABC Software, SRL	Goods	Male	Legal Person	05 30 2007	Active	Unknown	DISTRITO NACIONAL
223	Dirección General de Aduanas y Puertos	Exception Processes	single provider	531000	531000	0	01 8 2020	02 21 2020	44	Closed	5604	ABC Software, SRL	Services	Male	Legal Person	05 30 2007	Active	Unknown	DISTRITO NACIONAL
134	Ministerio Administrativo de la Presidencia	Exception Processes	single provider	163200	192576	29376	05 15 2020	05 15 2020	0	Closed	5604	ABC Software, SRL	Goods	Male	Legal Person	05 30 2007	Active	Unknown	DISTRITO NACIONAL
202	Comunidad Digna	Purchases Below the Threshold	ordinary process	24780	24780	0	05 25 2020	05 25 2020	0	Closed	5604	ABC Software, SRL	Services	Male	Legal Person	05 30 2007	Active	Unknown	DISTRITO NACIONAL
223	Dirección General de Aduanas y Puertos	Exception Processes	single provider	177000	177000	0	07 10 2020	07 31 2020	21	Closed	5604	ABC Software, SRL	Services	Male	Legal Person	05 30 2007	Active	Unknown	DISTRITO NACIONAL
248	Oficina Metropolitana de Servicios de Autobuses OMSA	Minor Purchases	ordinary process	348336	411036.48	62700.48	07 21 2020	07 27 2020	6	Closed	5604	ABC Software, SRL	Services	Male	Legal Person	05 30 2007	Active	Unknown	DISTRITO NACIONAL
134	Ministerio Administrativo de la Presidencia	Exception Processes	single provider	306000	361080	55080	08 3 2020	08 5 2020	2	Closed	5604	ABC Software, SRL	Services	Male	Legal Person	05 30 2007	Active	Unknown	DISTRITO NACIONAL
202	Comunidad Digna	Purchases Below the Threshold	ordinary process	10620	10620	0	03 18 2021	03 19 2021	1	In edition	5604	ABC Software, SRL	Services	Male	Legal Person	05 30 2007	Active	Unknown	DISTRITO NACIONAL
197	Ministerio de la Presidencia	Purchases Below the Threshold	ordinary process	125000	120360	-4640	03 29 2021	03 29 2021	0	Closed	5604	ABC Software, SRL	Goods	Male	Legal Person	05 30 2007	Active	Unknown	DISTRITO NACIONAL
134	Ministerio Administrativo de la Presidencia	Exception Processes	single provider	204000	240720	36720	03 31 2021	04 5 2021	5	Active	5604	ABC Software, SRL	Goods	Male	Legal Person	05 30 2007	Active	Unknown	DISTRITO NACIONAL
248	Oficina Metropolitana de Servicios de Autobuses OMSA	Minor Purchases	ordinary process	540000	637200	97200	05 25 2021	05 31 2021	6	Active	5604	ABC Software, SRL	Services	Male	Legal Person	05 30 2007	Active	Unknown	DISTRITO NACIONAL
134	Ministerio Administrativo de la Presidencia	Purchases Below the Threshold	ordinary process	163200	192576	29376	02 10 2023	02 13 2023	3	Closed	5604	ABC Software, SRL	Goods	Male	Legal Person	05 30 2007	Active	Unknown	DISTRITO NACIONAL
134	Ministerio Administrativo de la Presidencia	Purchases Below the Threshold	ordinary process	185000	218772	33772	02 14 2023	02 15 2023	1	Active	5604	ABC Software, SRL	Services	Male	Legal Person	05 30 2007	Active	Unknown	DISTRITO NACIONAL
134	Ministerio Administrativo de la Presidencia	Exception Processes	single provider	360000	424800	64800	02 22 2023	02 23 2023	1	Active	5604	ABC Software, SRL	Services	Male	Legal Person	05 30 2007	Active	Unknown	DISTRITO NACIONAL
1155	Dirección de Estrategia y Comunicación Gubernamental	Purchases Below the Threshold	ordinary process	12036	12036	0	03 1 2023	03 1 2023	0	Closed	5604	ABC Software, SRL	Goods	Male	Legal Person	05 30 2007	Active	Unknown	DISTRITO NACIONAL
147	Hospital General Docente de la Policía Nacional	Purchases Below the Threshold	ordinary process	30000	35400	5400	03 21 2023	03 30 2023	9	Active	5604	ABC Software, SRL	Services	Male	Legal Person	05 30 2007	Active	Unknown	DISTRITO NACIONAL
691	Corporación Estatal de Radio y Televisión	Purchases Below the Threshold	ordinary process	50000	42480	-7520	05 15 2023	05 15 2023	0	Active	5604	ABC Software, SRL	Services	Male	Legal Person	05 30 2007	Active	Unknown	DISTRITO NACIONAL
223	Dirección General de Aduanas y Puertos	Minor Purchases	ordinary process	531000	531000	0	05 16 2023	06 19 2023	34	Active	5604	ABC Software, SRL	Services	Male	Legal Person	05 30 2007	Active	Unknown	DISTRITO NACIONAL
622	Instituto Postal Dominicano	Exception Processes	air tickets, repairs and fuels	160000	160000	0	01 2 2018	01 2 2018	0	In edition	11916	Abensa (Abreu Energía), SRL	Goods	Male	Legal Person	12 29 2009	Outdated	Unknown	DISTRITO NACIONAL
622	Instituto Postal Dominicano	Exception Processes	air tickets, repairs and fuels	160000	160000	0	01 10 2018	01 10 2018	0	Active	11916	Abensa (Abreu Energía), SRL	Goods	Male	Legal Person	12 29 2009	Outdated	Unknown	DISTRITO NACIONAL
622	Instituto Postal Dominicano	Exception Processes	air tickets, repairs and fuels	160000	160000	0	01 16 2018	01 16 2018	0	In edition	11916	Abensa (Abreu Energía), SRL	Goods	Male	Legal Person	12 29 2009	Outdated	Unknown	DISTRITO NACIONAL
174	Ministerio de la Mujer	Exception Processes	air tickets, repairs and fuels	634000	634000	0	01 23 2018	01 23 2018	0	Active	11916	Abensa (Abreu Energía), SRL	Goods	Male	Legal Person	12 29 2009	Outdated	Unknown	DISTRITO NACIONAL
174	Ministerio de la Mujer	Exception Processes	air tickets, repairs and fuels	15000	15000	0	01 23 2018	01 23 2018	0	Active	11916	Abensa (Abreu Energía), SRL	Goods	Male	Legal Person	12 29 2009	Outdated	Unknown	DISTRITO NACIONAL
174	Ministerio de la Mujer	Exception Processes	air tickets, repairs and fuels	20000	20000	0	01 23 2018	01 23 2018	0	In edition	11916	Abensa (Abreu Energía), SRL	Goods	Male	Legal Person	12 29 2009	Outdated	Unknown	DISTRITO NACIONAL
174	Ministerio de la Mujer	Exception Processes	air tickets, repairs and fuels	76000	76000	0	01 23 2018	01 23 2018	0	Active	11916	Abensa (Abreu Energía), SRL	Goods	Male	Legal Person	12 29 2009	Outdated	Unknown	DISTRITO NACIONAL
622	Instituto Postal Dominicano	Exception Processes	air tickets, repairs and fuels	160000	160000	0	01 24 2018	01 25 2018	1	In edition	11916	Abensa (Abreu Energía), SRL	Goods	Male	Legal Person	12 29 2009	Outdated	Unknown	DISTRITO NACIONAL
670	Instituto Nacional de Auxilios y Viviendas	Exception Processes	air tickets, repairs and fuels	821350	605600	-215750	01 24 2018	01 25 2018	1	Active	11916	Abensa (Abreu Energía), SRL	Goods	Male	Legal Person	12 29 2009	Outdated	Unknown	DISTRITO NACIONAL
174	Ministerio de la Mujer	Exception Processes	air tickets, repairs and fuels	20000	20000	0	01 25 2018	01 25 2018	0	Active	11916	Abensa (Abreu Energía), SRL	Goods	Male	Legal Person	12 29 2009	Outdated	Unknown	DISTRITO NACIONAL
670	Instituto Nacional de Auxilios y Viviendas	Purchases Below the Threshold	ordinary process	35100	35100	0	01 26 2018	01 26 2018	0	In edition	11916	Abensa (Abreu Energía), SRL	Goods	Male	Legal Person	12 29 2009	Outdated	Unknown	DISTRITO NACIONAL
622	Instituto Postal Dominicano	Exception Processes	air tickets, repairs and fuels	160000	160000	0	02 1 2018	02 1 2018	0	Active	11916	Abensa (Abreu Energía), SRL	Goods	Male	Legal Person	12 29 2009	Outdated	Unknown	DISTRITO NACIONAL
622	Instituto Postal Dominicano	Exception Processes	air tickets, repairs and fuels	160000	160000	0	02 2 2018	02 2 2018	0	In edition	11916	Abensa (Abreu Energía), SRL	Goods	Male	Legal Person	12 29 2009	Outdated	Unknown	DISTRITO NACIONAL
174	Ministerio de la Mujer	Exception Processes	air tickets, repairs and fuels	634000	634000	0	02 6 2018	02 6 2018	0	Modified	11916	Abensa (Abreu Energía), SRL	Goods	Male	Legal Person	12 29 2009	Outdated	Unknown	DISTRITO NACIONAL
174	Ministerio de la Mujer	Exception Processes	air tickets, repairs and fuels	40000	40000	0	02 6 2018	02 6 2018	0	Closed	11916	Abensa (Abreu Energía), SRL	Goods	Male	Legal Person	12 29 2009	Outdated	Unknown	DISTRITO NACIONAL
174	Ministerio de la Mujer	Exception Processes	air tickets, repairs and fuels	15000	15000	0	02 6 2018	02 6 2018	0	Active	11916	Abensa (Abreu Energía), SRL	Goods	Male	Legal Person	12 29 2009	Outdated	Unknown	DISTRITO NACIONAL
622	Instituto Postal Dominicano	Exception Processes	air tickets, repairs and fuels	160000	160000	0	02 7 2018	02 7 2018	0	In edition	11916	Abensa (Abreu Energía), SRL	Goods	Male	Legal Person	12 29 2009	Outdated	Unknown	DISTRITO NACIONAL
622	Instituto Postal Dominicano	Exception Processes	air tickets, repairs and fuels	160000	160000	0	02 14 2018	02 14 2018	0	In edition	11916	Abensa (Abreu Energía), SRL	Goods	Male	Legal Person	12 29 2009	Outdated	Unknown	DISTRITO NACIONAL
670	Instituto Nacional de Auxilios y Viviendas	Exception Processes	urgency	821350	605600	-215750	02 20 2018	02 20 2018	0	In edition	11916	Abensa (Abreu Energía), SRL	Goods	Male	Legal Person	12 29 2009	Outdated	Unknown	DISTRITO NACIONAL
174	Ministerio de la Mujer	Exception Processes	air tickets, repairs and fuels	40000	40000	0	02 20 2018	02 20 2018	0	Active	11916	Abensa (Abreu Energía), SRL	Goods	Male	Legal Person	12 29 2009	Outdated	Unknown	DISTRITO NACIONAL
622	Instituto Postal Dominicano	Exception Processes	air tickets, repairs and fuels	160000	160000	0	02 20 2018	02 21 2018	1	In edition	11916	Abensa (Abreu Energía), SRL	Goods	Male	Legal Person	12 29 2009	Outdated	Unknown	DISTRITO NACIONAL
622	Instituto Postal Dominicano	Exception Processes	air tickets, repairs and fuels	160000	160000	0	02 28 2018	02 28 2018	0	In edition	11916	Abensa (Abreu Energía), SRL	Goods	Male	Legal Person	12 29 2009	Outdated	Unknown	DISTRITO NACIONAL
174	Ministerio de la Mujer	Exception Processes	air tickets, repairs and fuels	15000	15000	0	03 1 2018	03 1 2018	0	Closed	11916	Abensa (Abreu Energía), SRL	Goods	Male	Legal Person	12 29 2009	Outdated	Unknown	DISTRITO NACIONAL
174	Ministerio de la Mujer	Exception Processes	air tickets, repairs and fuels	634000	634000	0	03 1 2018	03 1 2018	0	Closed	11916	Abensa (Abreu Energía), SRL	Goods	Male	Legal Person	12 29 2009	Outdated	Unknown	DISTRITO NACIONAL
622	Instituto Postal Dominicano	Exception Processes	air tickets, repairs and fuels	160000	160000	0	03 7 2018	03 9 2018	2	In edition	11916	Abensa (Abreu Energía), SRL	Goods	Male	Legal Person	12 29 2009	Outdated	Unknown	DISTRITO NACIONAL
174	Ministerio de la Mujer	Exception Processes	air tickets, repairs and fuels	66600	66600	0	03 7 2018	03 8 2018	1	Active	11916	Abensa (Abreu Energía), SRL	Goods	Male	Legal Person	12 29 2009	Outdated	Unknown	DISTRITO NACIONAL
174	Ministerio de la Mujer	Exception Processes	air tickets, repairs and fuels	40000	40000	0	03 9 2018	03 9 2018	0	Closed	11916	Abensa (Abreu Energía), SRL	Goods	Male	Legal Person	12 29 2009	Outdated	Unknown	DISTRITO NACIONAL
670	Instituto Nacional de Auxilios y Viviendas	Exception Processes	single provider	821350	605600	-215750	03 15 2018	03 16 2018	1	Active	11916	Abensa (Abreu Energía), SRL	Goods	Male	Legal Person	12 29 2009	Outdated	Unknown	DISTRITO NACIONAL
670	Instituto Nacional de Auxilios y Viviendas	Exception Processes	single provider	821350	605600	-215750	03 15 2018	03 16 2018	1	Cancelled	11916	Abensa (Abreu Energía), SRL	Unknown	Male	Legal Person	12 29 2009	Outdated	Unknown	DISTRITO NACIONAL
622	Instituto Postal Dominicano	Exception Processes	air tickets, repairs and fuels	160000	160000	0	03 16 2018	03 16 2018	0	In edition	11916	Abensa (Abreu Energía), SRL	Goods	Male	Legal Person	12 29 2009	Outdated	Unknown	DISTRITO NACIONAL
670	Instituto Nacional de Auxilios y Viviendas	Purchases Below the Threshold	ordinary process	18900	21995.2	3095.2	03 22 2018	03 22 2018	0	Active	11916	Abensa (Abreu Energía), SRL	Goods	Male	Legal Person	12 29 2009	Outdated	Unknown	DISTRITO NACIONAL
622	Instituto Postal Dominicano	Exception Processes	air tickets, repairs and fuels	160000	160000	0	03 22 2018	03 22 2018	0	In edition	11916	Abensa (Abreu Energía), SRL	Goods	Male	Legal Person	12 29 2009	Outdated	Unknown	DISTRITO NACIONAL
174	Ministerio de la Mujer	Exception Processes	air tickets, repairs and fuels	20000	20000	0	03 27 2018	03 27 2018	0	Closed	11916	Abensa (Abreu Energía), SRL	Goods	Male	Legal Person	12 29 2009	Outdated	Unknown	DISTRITO NACIONAL
622	Instituto Postal Dominicano	Exception Processes	air tickets, repairs and fuels	160000	160000	0	03 28 2018	04 2 2018	5	In edition	11916	Abensa (Abreu Energía), SRL	Goods	Male	Legal Person	12 29 2009	Outdated	Unknown	DISTRITO NACIONAL
174	Ministerio de la Mujer	Exception Processes	air tickets, repairs and fuels	15000	15000	0	04 2 2018	04 2 2018	0	Closed	11916	Abensa (Abreu Energía), SRL	Goods	Male	Legal Person	12 29 2009	Outdated	Unknown	DISTRITO NACIONAL
174	Ministerio de la Mujer	Exception Processes	air tickets, repairs and fuels	77800	77800	0	04 3 2018	04 3 2018	0	Active	11916	Abensa (Abreu Energía), SRL	Goods	Male	Legal Person	12 29 2009	Outdated	Unknown	DISTRITO NACIONAL
622	Instituto Postal Dominicano	Exception Processes	air tickets, repairs and fuels	160000	160000	0	04 4 2018	04 4 2018	0	In edition	11916	Abensa (Abreu Energía), SRL	Goods	Male	Legal Person	12 29 2009	Outdated	Unknown	DISTRITO NACIONAL
174	Ministerio de la Mujer	Exception Processes	air tickets, repairs and fuels	634000	634000	0	04 4 2018	04 4 2018	0	Closed	11916	Abensa (Abreu Energía), SRL	Goods	Male	Legal Person	12 29 2009	Outdated	Unknown	DISTRITO NACIONAL
622	Instituto Postal Dominicano	Exception Processes	air tickets, repairs and fuels	160000	160000	0	04 10 2018	04 10 2018	0	In edition	11916	Abensa (Abreu Energía), SRL	Goods	Male	Legal Person	12 29 2009	Outdated	Unknown	DISTRITO NACIONAL
174	Ministerio de la Mujer	Exception Processes	air tickets, repairs and fuels	40000	40000	0	04 16 2018	04 16 2018	0	Closed	11916	Abensa (Abreu Energía), SRL	Goods	Male	Legal Person	12 29 2009	Outdated	Unknown	DISTRITO NACIONAL
174	Ministerio de la Mujer	Exception Processes	air tickets, repairs and fuels	50000	50000	0	04 16 2018	04 16 2018	0	Closed	11916	Abensa (Abreu Energía), SRL	Goods	Male	Legal Person	12 29 2009	Outdated	Unknown	DISTRITO NACIONAL
622	Instituto Postal Dominicano	Exception Processes	air tickets, repairs and fuels	160000	160000	0	04 18 2018	04 18 2018	0	In edition	11916	Abensa (Abreu Energía), SRL	Goods	Male	Legal Person	12 29 2009	Outdated	Unknown	DISTRITO NACIONAL
622	Instituto Postal Dominicano	Exception Processes	air tickets, repairs and fuels	160000	160000	0	04 25 2018	04 25 2018	0	In edition	11916	Abensa (Abreu Energía), SRL	Goods	Male	Legal Person	12 29 2009	Outdated	Unknown	DISTRITO NACIONAL
174	Ministerio de la Mujer	Exception Processes	air tickets, repairs and fuels	70800	70800	0	05 1 2018	05 1 2018	0	Active	11916	Abensa (Abreu Energía), SRL	Goods	Male	Legal Person	12 29 2009	Outdated	Unknown	DISTRITO NACIONAL
174	Ministerio de la Mujer	Exception Processes	air tickets, repairs and fuels	634000	634000	0	05 2 2018	05 2 2018	0	Closed	11916	Abensa (Abreu Energía), SRL	Goods	Male	Legal Person	12 29 2009	Outdated	Unknown	DISTRITO NACIONAL
174	Ministerio de la Mujer	Exception Processes	air tickets, repairs and fuels	15000	15000	0	05 2 2018	05 2 2018	0	Closed	11916	Abensa (Abreu Energía), SRL	Goods	Male	Legal Person	12 29 2009	Outdated	Unknown	DISTRITO NACIONAL
622	Instituto Postal Dominicano	Exception Processes	air tickets, repairs and fuels	160000	160000	0	05 3 2018	05 3 2018	0	In edition	11916	Abensa (Abreu Energía), SRL	Goods	Male	Legal Person	12 29 2009	Outdated	Unknown	DISTRITO NACIONAL
670	Instituto Nacional de Auxilios y Viviendas	Exception Processes	single provider	639750	605600	-34150	05 4 2018	05 4 2018	0	Approved flow	11916	Abensa (Abreu Energía), SRL	Goods	Male	Legal Person	12 29 2009	Outdated	Unknown	DISTRITO NACIONAL
670	Instituto Nacional de Auxilios y Viviendas	Exception Processes	single provider	639750	605600	-34150	05 4 2018	05 4 2018	0	Cancelled	11916	Abensa (Abreu Energía), SRL	Unknown	Male	Legal Person	12 29 2009	Outdated	Unknown	DISTRITO NACIONAL
174	Ministerio de la Mujer	Exception Processes	air tickets, repairs and fuels	40000	40000	0	05 7 2018	05 7 2018	0	Closed	11916	Abensa (Abreu Energía), SRL	Goods	Male	Legal Person	12 29 2009	Outdated	Unknown	DISTRITO NACIONAL
622	Instituto Postal Dominicano	Exception Processes	air tickets, repairs and fuels	160000	160000	0	05 8 2018	05 8 2018	0	In edition	11916	Abensa (Abreu Energía), SRL	Goods	Male	Legal Person	12 29 2009	Outdated	Unknown	DISTRITO NACIONAL
174	Ministerio de la Mujer	Exception Processes	air tickets, repairs and fuels	20000	20000	0	05 11 2018	05 11 2018	0	Closed	11916	Abensa (Abreu Energía), SRL	Goods	Male	Legal Person	12 29 2009	Outdated	Unknown	DISTRITO NACIONAL
622	Instituto Postal Dominicano	Exception Processes	air tickets, repairs and fuels	160000	160000	0	05 21 2018	05 18 2018	-3	Active	11916	Abensa (Abreu Energía), SRL	Goods	Male	Legal Person	12 29 2009	Outdated	Unknown	DISTRITO NACIONAL
670	Instituto Nacional de Auxilios y Viviendas	Exception Processes	single provider	831450	605600	-225850	05 18 2018	05 18 2018	0	In edition	11916	Abensa (Abreu Energía), SRL	Goods	Male	Legal Person	12 29 2009	Outdated	Unknown	DISTRITO NACIONAL
174	Ministerio de la Mujer	Exception Processes	air tickets, repairs and fuels	40000	40000	0	05 24 2018	05 24 2018	0	Closed	11916	Abensa (Abreu Energía), SRL	Goods	Male	Legal Person	12 29 2009	Outdated	Unknown	DISTRITO NACIONAL
622	Instituto Postal Dominicano	Exception Processes	air tickets, repairs and fuels	160000	160000	0	05 24 2018	05 24 2018	0	Active	11916	Abensa (Abreu Energía), SRL	Goods	Male	Legal Person	12 29 2009	Outdated	Unknown	DISTRITO NACIONAL
622	Instituto Postal Dominicano	Exception Processes	air tickets, repairs and fuels	160000	160000	0	05 29 2018	05 29 2018	0	Active	11916	Abensa (Abreu Energía), SRL	Goods	Male	Legal Person	12 29 2009	Outdated	Unknown	DISTRITO NACIONAL
174	Ministerio de la Mujer	Exception Processes	air tickets, repairs and fuels	15000	15000	0	06 4 2018	06 4 2018	0	Closed	11916	Abensa (Abreu Energía), SRL	Goods	Male	Legal Person	12 29 2009	Outdated	Unknown	DISTRITO NACIONAL
174	Ministerio de la Mujer	Exception Processes	air tickets, repairs and fuels	40000	40000	0	06 4 2018	06 4 2018	0	Closed	11916	Abensa (Abreu Energía), SRL	Goods	Male	Legal Person	12 29 2009	Outdated	Unknown	DISTRITO NACIONAL
174	Ministerio de la Mujer	Exception Processes	air tickets, repairs and fuels	634000	634000	0	06 5 2018	06 5 2018	0	Closed	11916	Abensa (Abreu Energía), SRL	Goods	Male	Legal Person	12 29 2009	Outdated	Unknown	DISTRITO NACIONAL
174	Ministerio de la Mujer	Exception Processes	air tickets, repairs and fuels	72800	72800	0	06 5 2018	06 5 2018	0	Active	11916	Abensa (Abreu Energía), SRL	Goods	Male	Legal Person	12 29 2009	Outdated	Unknown	DISTRITO NACIONAL
622	Instituto Postal Dominicano	Exception Processes	air tickets, repairs and fuels	160000	160000	0	06 6 2018	06 6 2018	0	Active	11916	Abensa (Abreu Energía), SRL	Goods	Male	Legal Person	12 29 2009	Outdated	Unknown	DISTRITO NACIONAL
622	Instituto Postal Dominicano	Exception Processes	air tickets, repairs and fuels	160000	160000	0	06 12 2018	06 12 2018	0	Active	11916	Abensa (Abreu Energía), SRL	Goods	Male	Legal Person	12 29 2009	Outdated	Unknown	DISTRITO NACIONAL
670	Instituto Nacional de Auxilios y Viviendas	Exception Processes	air tickets, repairs and fuels	831450	605600	-225850	06 15 2018	06 18 2018	3	Active	11916	Abensa (Abreu Energía), SRL	Goods	Male	Legal Person	12 29 2009	Outdated	Unknown	DISTRITO NACIONAL
622	Instituto Postal Dominicano	Exception Processes	air tickets, repairs and fuels	160000	160000	0	06 21 2018	06 21 2018	0	Closed	11916	Abensa (Abreu Energía), SRL	Goods	Male	Legal Person	12 29 2009	Outdated	Unknown	DISTRITO NACIONAL
622	Instituto Postal Dominicano	Exception Processes	air tickets, repairs and fuels	160000	160000	0	06 26 2018	06 26 2018	0	Closed	11916	Abensa (Abreu Energía), SRL	Goods	Male	Legal Person	12 29 2009	Outdated	Unknown	DISTRITO NACIONAL
174	Ministerio de la Mujer	Purchases Below the Threshold	ordinary process	20000	20000	0	06 26 2018	06 26 2018	0	Closed	11916	Abensa (Abreu Energía), SRL	Goods	Male	Legal Person	12 29 2009	Outdated	Unknown	DISTRITO NACIONAL
174	Ministerio de la Mujer	Purchases Below the Threshold	ordinary process	20000	20000	0	06 26 2018	06 26 2018	0	Closed	11916	Abensa (Abreu Energía), SRL	Goods	Male	Legal Person	12 29 2009	Outdated	Unknown	DISTRITO NACIONAL
622	Instituto Postal Dominicano	Exception Processes	air tickets, repairs and fuels	160000	160000	0	07 2 2018	07 3 2018	1	Active	11916	Abensa (Abreu Energía), SRL	Goods	Male	Legal Person	12 29 2009	Outdated	Unknown	DISTRITO NACIONAL
174	Ministerio de la Mujer	Exception Processes	air tickets, repairs and fuels	22000	22000	0	07 4 2018	07 4 2018	0	Closed	11916	Abensa (Abreu Energía), SRL	Goods	Male	Legal Person	12 29 2009	Outdated	Unknown	DISTRITO NACIONAL
174	Ministerio de la Mujer	Exception Processes	air tickets, repairs and fuels	15000	15000	0	07 4 2018	07 4 2018	0	Closed	11916	Abensa (Abreu Energía), SRL	Goods	Male	Legal Person	12 29 2009	Outdated	Unknown	DISTRITO NACIONAL
670	Instituto Nacional de Auxilios y Viviendas	Exception Processes	air tickets, repairs and fuels	350000	365000	15000	07 4 2018	07 5 2018	1	Active	11916	Abensa (Abreu Energía), SRL	Goods	Male	Legal Person	12 29 2009	Outdated	Unknown	DISTRITO NACIONAL
174	Ministerio de la Mujer	Exception Processes	air tickets, repairs and fuels	634000	634000	0	07 5 2018	07 5 2018	0	Closed	11916	Abensa (Abreu Energía), SRL	Goods	Male	Legal Person	12 29 2009	Outdated	Unknown	DISTRITO NACIONAL
174	Ministerio de la Mujer	Exception Processes	air tickets, repairs and fuels	72200	72200	0	07 5 2018	07 5 2018	0	Active	11916	Abensa (Abreu Energía), SRL	Goods	Male	Legal Person	12 29 2009	Outdated	Unknown	DISTRITO NACIONAL
174	Ministerio de la Mujer	Exception Processes	air tickets, repairs and fuels	40000	40000	0	07 6 2018	07 6 2018	0	Active	11916	Abensa (Abreu Energía), SRL	Goods	Male	Legal Person	12 29 2009	Outdated	Unknown	DISTRITO NACIONAL
622	Instituto Postal Dominicano	Exception Processes	air tickets, repairs and fuels	160000	160000	0	07 12 2018	07 12 2018	0	Active	11916	Abensa (Abreu Energía), SRL	Goods	Male	Legal Person	12 29 2009	Outdated	Unknown	DISTRITO NACIONAL
670	Instituto Nacional de Auxilios y Viviendas	Exception Processes	single provider	831450	605600	-225850	07 17 2018	07 17 2018	0	Cancelled	11916	Abensa (Abreu Energía), SRL	Goods	Male	Legal Person	12 29 2009	Outdated	Unknown	DISTRITO NACIONAL
670	Instituto Nacional de Auxilios y Viviendas	Exception Processes	single provider	831450	605600	-225850	07 17 2018	08 10 2018	24	In edition	11916	Abensa (Abreu Energía), SRL	Unknown	Male	Legal Person	12 29 2009	Outdated	Unknown	DISTRITO NACIONAL
622	Instituto Postal Dominicano	Exception Processes	air tickets, repairs and fuels	160000	160000	0	07 19 2018	07 19 2018	0	Active	11916	Abensa (Abreu Energía), SRL	Goods	Male	Legal Person	12 29 2009	Outdated	Unknown	DISTRITO NACIONAL
622	Instituto Postal Dominicano	Exception Processes	air tickets, repairs and fuels	160000	160000	0	07 26 2018	07 26 2018	0	Active	11916	Abensa (Abreu Energía), SRL	Goods	Male	Legal Person	12 29 2009	Outdated	Unknown	DISTRITO NACIONAL
622	Instituto Postal Dominicano	Exception Processes	air tickets, repairs and fuels	160000	160000	0	07 31 2018	07 31 2018	0	Active	11916	Abensa (Abreu Energía), SRL	Goods	Male	Legal Person	12 29 2009	Outdated	Unknown	DISTRITO NACIONAL
174	Ministerio de la Mujer	Exception Processes	air tickets, repairs and fuels	634000	634000	0	08 2 2018	08 2 2018	0	Closed	11916	Abensa (Abreu Energía), SRL	Goods	Male	Legal Person	12 29 2009	Outdated	Unknown	DISTRITO NACIONAL
622	Instituto Postal Dominicano	Exception Processes	air tickets, repairs and fuels	160000	160000	0	08 7 2018	08 7 2018	0	Active	11916	Abensa (Abreu Energía), SRL	Goods	Male	Legal Person	12 29 2009	Outdated	Unknown	DISTRITO NACIONAL
174	Ministerio de la Mujer	Exception Processes	air tickets, repairs and fuels	15000	15000	0	08 8 2018	08 8 2018	0	Closed	11916	Abensa (Abreu Energía), SRL	Goods	Male	Legal Person	12 29 2009	Outdated	Unknown	DISTRITO NACIONAL
174	Ministerio de la Mujer	Exception Processes	air tickets, repairs and fuels	63900	63900	0	08 8 2018	08 8 2018	0	Active	11916	Abensa (Abreu Energía), SRL	Goods	Male	Legal Person	12 29 2009	Outdated	Unknown	DISTRITO NACIONAL
174	Ministerio de la Mujer	Exception Processes	air tickets, repairs and fuels	20000	20000	0	08 10 2018	08 10 2018	0	Closed	11916	Abensa (Abreu Energía), SRL	Goods	Male	Legal Person	12 29 2009	Outdated	Unknown	DISTRITO NACIONAL
174	Ministerio de la Mujer	Exception Processes	air tickets, repairs and fuels	40000	40000	0	08 10 2018	08 10 2018	0	Closed	11916	Abensa (Abreu Energía), SRL	Goods	Male	Legal Person	12 29 2009	Outdated	Unknown	DISTRITO NACIONAL
174	Ministerio de la Mujer	Exception Processes	air tickets, repairs and fuels	20000	20000	0	08 14 2018	08 14 2018	0	Closed	11916	Abensa (Abreu Energía), SRL	Goods	Male	Legal Person	12 29 2009	Outdated	Unknown	DISTRITO NACIONAL
622	Instituto Postal Dominicano	Exception Processes	air tickets, repairs and fuels	160000	160000	0	08 15 2018	08 15 2018	0	Active	11916	Abensa (Abreu Energía), SRL	Goods	Male	Legal Person	12 29 2009	Outdated	Unknown	DISTRITO NACIONAL
670	Instituto Nacional de Auxilios y Viviendas	Exception Processes	air tickets, repairs and fuels	605600	605600	0	08 20 2018	08 20 2018	0	Active	11916	Abensa (Abreu Energía), SRL	Goods	Male	Legal Person	12 29 2009	Outdated	Unknown	DISTRITO NACIONAL
622	Instituto Postal Dominicano	Exception Processes	air tickets, repairs and fuels	160000	160000	0	08 22 2018	08 22 2018	0	Active	11916	Abensa (Abreu Energía), SRL	Goods	Male	Legal Person	12 29 2009	Outdated	Unknown	DISTRITO NACIONAL
174	Ministerio de la Mujer	Price Comparison	ordinary process	2187000	2187000	0	08 17 2018	08 29 2018	12	Active	11916	Abensa (Abreu Energía), SRL	Goods	Male	Legal Person	12 29 2009	Outdated	Unknown	DISTRITO NACIONAL
622	Instituto Postal Dominicano	Exception Processes	exclusivity	160000	160000	0	08 29 2018	08 29 2018	0	Active	11916	Abensa (Abreu Energía), SRL	Goods	Male	Legal Person	12 29 2009	Outdated	Unknown	DISTRITO NACIONAL
622	Instituto Postal Dominicano	Exception Processes	exclusivity	160000	160000	0	09 6 2018	09 6 2018	0	Active	11916	Abensa (Abreu Energía), SRL	Goods	Male	Legal Person	12 29 2009	Outdated	Unknown	DISTRITO NACIONAL
622	Instituto Postal Dominicano	Exception Processes	exclusivity	160000	160000	0	09 14 2018	09 14 2018	0	Active	11916	Abensa (Abreu Energía), SRL	Goods	Male	Legal Person	12 29 2009	Outdated	Unknown	DISTRITO NACIONAL
174	Ministerio de la Mujer	Purchases Below the Threshold	ordinary process	72200	72200	0	09 14 2018	09 14 2018	0	Active	11916	Abensa (Abreu Energía), SRL	Goods	Male	Legal Person	12 29 2009	Outdated	Unknown	DISTRITO NACIONAL
622	Instituto Postal Dominicano	Purchases Below the Threshold	ordinary process	39530	39000.003	-529.997	09 20 2018	09 25 2018	5	Active	11916	Abensa (Abreu Energía), SRL	Goods	Male	Legal Person	12 29 2009	Outdated	Unknown	DISTRITO NACIONAL
670	Instituto Nacional de Auxilios y Viviendas	Price Comparison	ordinary process	1816800	1816800	0	09 14 2018	10 16 2018	32	Active	11916	Abensa (Abreu Energía), SRL	Goods	Male	Legal Person	12 29 2009	Outdated	Unknown	DISTRITO NACIONAL
622	Instituto Postal Dominicano	Exception Processes	exclusivity	160000	160000	0	09 28 2018	10 1 2018	3	Active	11916	Abensa (Abreu Energía), SRL	Goods	Male	Legal Person	12 29 2009	Outdated	Unknown	DISTRITO NACIONAL
622	Instituto Postal Dominicano	Exception Processes	exclusivity	160000	160000	0	10 3 2018	10 3 2018	0	Active	11916	Abensa (Abreu Energía), SRL	Goods	Male	Legal Person	12 29 2009	Outdated	Unknown	DISTRITO NACIONAL
622	Instituto Postal Dominicano	Exception Processes	exclusivity	160000	160000	0	10 11 2018	10 11 2018	0	Active	11916	Abensa (Abreu Energía), SRL	Goods	Male	Legal Person	12 29 2009	Outdated	Unknown	DISTRITO NACIONAL
622	Instituto Postal Dominicano	Exception Processes	exclusivity	160000	160000	0	10 16 2018	10 17 2018	1	Active	11916	Abensa (Abreu Energía), SRL	Goods	Male	Legal Person	12 29 2009	Outdated	Unknown	DISTRITO NACIONAL
622	Instituto Postal Dominicano	Exception Processes	exclusivity	160000	160000	0	10 25 2018	10 26 2018	1	Active	11916	Abensa (Abreu Energía), SRL	Goods	Male	Legal Person	12 29 2009	Outdated	Unknown	DISTRITO NACIONAL
622	Instituto Postal Dominicano	Exception Processes	exclusivity	160000	160000	0	10 31 2018	10 31 2018	0	Active	11916	Abensa (Abreu Energía), SRL	Goods	Male	Legal Person	12 29 2009	Outdated	Unknown	DISTRITO NACIONAL
622	Instituto Postal Dominicano	Exception Processes	exclusivity	160000	160000	0	11 8 2018	11 8 2018	0	Active	11916	Abensa (Abreu Energía), SRL	Goods	Male	Legal Person	12 29 2009	Outdated	Unknown	DISTRITO NACIONAL
622	Instituto Postal Dominicano	Exception Processes	exclusivity	160000	160000	0	11 14 2018	11 14 2018	0	In edition	11916	Abensa (Abreu Energía), SRL	Goods	Male	Legal Person	12 29 2009	Outdated	Unknown	DISTRITO NACIONAL
622	Instituto Postal Dominicano	Exception Processes	exclusivity	160000	160000	0	11 22 2018	11 22 2018	0	Active	11916	Abensa (Abreu Energía), SRL	Goods	Male	Legal Person	12 29 2009	Outdated	Unknown	DISTRITO NACIONAL
622	Instituto Postal Dominicano	Exception Processes	exclusivity	160000	160000	0	11 28 2018	11 28 2018	0	Active	11916	Abensa (Abreu Energía), SRL	Goods	Male	Legal Person	12 29 2009	Outdated	Unknown	DISTRITO NACIONAL
670	Instituto Nacional de Auxilios y Viviendas	Minor Purchases	ordinary process	391960	382120	-9840	11 27 2018	11 30 2018	3	Active	11916	Abensa (Abreu Energía), SRL	Goods	Male	Legal Person	12 29 2009	Outdated	Unknown	DISTRITO NACIONAL
622	Instituto Postal Dominicano	Exception Processes	exclusivity	160000	160000	0	12 5 2018	12 5 2018	0	Active	11916	Abensa (Abreu Energía), SRL	Goods	Male	Legal Person	12 29 2009	Outdated	Unknown	DISTRITO NACIONAL
174	Ministerio de la Mujer	Exception Processes	urgency	900000	900000	0	12 6 2018	12 6 2018	0	Closed	11916	Abensa (Abreu Energía), SRL	Goods	Male	Legal Person	12 29 2009	Outdated	Unknown	DISTRITO NACIONAL
622	Instituto Postal Dominicano	Exception Processes	exclusivity	160000	160000	0	12 12 2018	12 12 2018	0	Active	11916	Abensa (Abreu Energía), SRL	Goods	Male	Legal Person	12 29 2009	Outdated	Unknown	DISTRITO NACIONAL
622	Instituto Postal Dominicano	Exception Processes	exclusivity	160000	160000	0	12 21 2018	12 21 2018	0	Active	11916	Abensa (Abreu Energía), SRL	Goods	Male	Legal Person	12 29 2009	Outdated	Unknown	DISTRITO NACIONAL
622	Instituto Postal Dominicano	Exception Processes	exclusivity	160000	160000	0	12 28 2018	12 28 2018	0	Active	11916	Abensa (Abreu Energía), SRL	Goods	Male	Legal Person	12 29 2009	Outdated	Unknown	DISTRITO NACIONAL
670	Instituto Nacional de Auxilios y Viviendas	Price Comparison	ordinary process	1816800	1816800	0	12 21 2018	01 3 2019	13	Closed	11916	Abensa (Abreu Energía), SRL	Goods	Male	Legal Person	12 29 2009	Outdated	Unknown	DISTRITO NACIONAL
622	Instituto Postal Dominicano	Exception Processes	exclusivity	160000	160000	0	01 4 2019	01 4 2019	0	Active	11916	Abensa (Abreu Energía), SRL	Goods	Male	Legal Person	12 29 2009	Outdated	Unknown	DISTRITO NACIONAL
622	Instituto Postal Dominicano	Exception Processes	exclusivity	160000	160000	0	01 10 2019	01 10 2019	0	Active	11916	Abensa (Abreu Energía), SRL	Goods	Male	Legal Person	12 29 2009	Outdated	Unknown	DISTRITO NACIONAL
622	Instituto Postal Dominicano	Exception Processes	exclusivity	160000	160000	0	01 16 2019	01 16 2019	0	Active	11916	Abensa (Abreu Energía), SRL	Goods	Male	Legal Person	12 29 2009	Outdated	Unknown	DISTRITO NACIONAL
622	Instituto Postal Dominicano	Exception Processes	exclusivity	160000	160000	0	01 24 2019	01 25 2019	1	Active	11916	Abensa (Abreu Energía), SRL	Goods	Male	Legal Person	12 29 2009	Outdated	Unknown	DISTRITO NACIONAL
622	Instituto Postal Dominicano	Exception Processes	exclusivity	160000	160000	0	02 1 2019	02 1 2019	0	Active	11916	Abensa (Abreu Energía), SRL	Goods	Male	Legal Person	12 29 2009	Outdated	Unknown	DISTRITO NACIONAL
622	Instituto Postal Dominicano	Exception Processes	exclusivity	160000	160000	0	02 6 2019	02 7 2019	1	Active	11916	Abensa (Abreu Energía), SRL	Goods	Male	Legal Person	12 29 2009	Outdated	Unknown	DISTRITO NACIONAL
622	Instituto Postal Dominicano	Exception Processes	exclusivity	160000	160000	0	02 12 2019	02 12 2019	0	Active	11916	Abensa (Abreu Energía), SRL	Goods	Male	Legal Person	12 29 2009	Outdated	Unknown	DISTRITO NACIONAL
174	Ministerio de la Mujer	Price Comparison	ordinary process	3930000	3930000	0	02 7 2019	02 18 2019	11	Closed	11916	Abensa (Abreu Energía), SRL	Goods	Male	Legal Person	12 29 2009	Outdated	Unknown	DISTRITO NACIONAL
622	Instituto Postal Dominicano	Exception Processes	exclusivity	160000	160000	0	02 20 2019	02 20 2019	0	Active	11916	Abensa (Abreu Energía), SRL	Goods	Male	Legal Person	12 29 2009	Outdated	Unknown	DISTRITO NACIONAL
893	Consejo Nacional de Drogas	Price Comparison	ordinary process	1170000	1170000	0	02 15 2019	02 28 2019	13	Closed	11916	Abensa (Abreu Energía), SRL	Goods	Male	Legal Person	12 29 2009	Outdated	Unknown	DISTRITO NACIONAL
622	Instituto Postal Dominicano	Exception Processes	exclusivity	160000	160000	0	02 26 2019	02 28 2019	2	Active	11916	Abensa (Abreu Energía), SRL	Goods	Male	Legal Person	12 29 2009	Outdated	Unknown	DISTRITO NACIONAL
622	Instituto Postal Dominicano	Exception Processes	exclusivity	160000	160000	0	03 6 2019	03 6 2019	0	Active	11916	Abensa (Abreu Energía), SRL	Goods	Male	Legal Person	12 29 2009	Outdated	Unknown	DISTRITO NACIONAL
893	Consejo Nacional de Drogas	Purchases Below the Threshold	ordinary process	17600	17600	0	03 13 2019	03 13 2019	0	Closed	11916	Abensa (Abreu Energía), SRL	Services	Male	Legal Person	12 29 2009	Outdated	Unknown	DISTRITO NACIONAL
893	Consejo Nacional de Drogas	Purchases Below the Threshold	ordinary process	12000	11999.7504	-0.2496	03 13 2019	03 13 2019	0	Closed	11916	Abensa (Abreu Energía), SRL	Goods	Male	Legal Person	12 29 2009	Outdated	Unknown	DISTRITO NACIONAL
622	Instituto Postal Dominicano	Exception Processes	exclusivity	160000	160000	0	03 15 2019	03 15 2019	0	Active	11916	Abensa (Abreu Energía), SRL	Goods	Male	Legal Person	12 29 2009	Outdated	Unknown	DISTRITO NACIONAL
622	Instituto Postal Dominicano	Exception Processes	exclusivity	160000	160000	0	03 20 2019	03 20 2019	0	Active	11916	Abensa (Abreu Energía), SRL	Services	Male	Legal Person	12 29 2009	Outdated	Unknown	DISTRITO NACIONAL
670	Instituto Nacional de Auxilios y Viviendas	Price Comparison	ordinary process	3633600	3633600	0	03 18 2019	04 5 2019	18	Closed	11916	Abensa (Abreu Energía), SRL	Goods	Male	Legal Person	12 29 2009	Outdated	Unknown	DISTRITO NACIONAL
622	Instituto Postal Dominicano	Exception Processes	exclusivity	160000	160000	0	03 28 2019	03 28 2019	0	Active	11916	Abensa (Abreu Energía), SRL	Goods	Male	Legal Person	12 29 2009	Outdated	Unknown	DISTRITO NACIONAL
622	Instituto Postal Dominicano	Exception Processes	exclusivity	160000	160000	0	04 4 2019	04 4 2019	0	Active	11916	Abensa (Abreu Energía), SRL	Goods	Male	Legal Person	12 29 2009	Outdated	Unknown	DISTRITO NACIONAL
622	Instituto Postal Dominicano	Exception Processes	exclusivity	160000	160000	0	04 12 2019	04 12 2019	0	Active	11916	Abensa (Abreu Energía), SRL	Goods	Male	Legal Person	12 29 2009	Outdated	Unknown	DISTRITO NACIONAL
893	Consejo Nacional de Drogas	Minor Purchases	ordinary process	975000	975000	0	04 9 2019	04 15 2019	6	Closed	11916	Abensa (Abreu Energía), SRL	Services	Male	Legal Person	12 29 2009	Outdated	Unknown	DISTRITO NACIONAL
622	Instituto Postal Dominicano	Exception Processes	exclusivity	160000	160000	0	04 16 2019	04 16 2019	0	Active	11916	Abensa (Abreu Energía), SRL	Goods	Male	Legal Person	12 29 2009	Outdated	Unknown	DISTRITO NACIONAL
670	Instituto Nacional de Auxilios y Viviendas	Minor Purchases	ordinary process	360400	360400	0	04 22 2019	04 25 2019	3	Closed	11916	Abensa (Abreu Energía), SRL	Goods	Male	Legal Person	12 29 2009	Outdated	Unknown	DISTRITO NACIONAL
622	Instituto Postal Dominicano	Exception Processes	exclusivity	160000	160000	0	04 25 2019	04 25 2019	0	Active	11916	Abensa (Abreu Energía), SRL	Goods	Male	Legal Person	12 29 2009	Outdated	Unknown	DISTRITO NACIONAL
670	Instituto Nacional de Auxilios y Viviendas	Minor Purchases	ordinary process	222950	222950	0	06 17 2019	06 21 2019	4	Closed	11916	Abensa (Abreu Energía), SRL	Goods	Male	Legal Person	12 29 2009	Outdated	Unknown	DISTRITO NACIONAL
893	Consejo Nacional de Drogas	Price Comparison	ordinary process	1170000	1170000	0	07 10 2019	08 5 2019	26	Closed	11916	Abensa (Abreu Energía), SRL	Goods	Male	Legal Person	12 29 2009	Outdated	Unknown	DISTRITO NACIONAL
893	Consejo Nacional de Drogas	Purchases Below the Threshold	ordinary process	45000	45000	0	08 8 2019	08 8 2019	0	Closed	11916	Abensa (Abreu Energía), SRL	Goods	Male	Legal Person	12 29 2009	Outdated	Unknown	DISTRITO NACIONAL
893	Consejo Nacional de Drogas	Purchases Below the Threshold	ordinary process	35760	35760	0	08 9 2019	08 9 2019	0	Closed	11916	Abensa (Abreu Energía), SRL	Goods	Male	Legal Person	12 29 2009	Outdated	Unknown	DISTRITO NACIONAL
670	Instituto Nacional de Auxilios y Viviendas	Purchases Below the Threshold	ordinary process	44125	44125	0	09 19 2019	09 19 2019	0	Closed	11916	Abensa (Abreu Energía), SRL	Goods	Male	Legal Person	12 29 2009	Outdated	Unknown	DISTRITO NACIONAL
893	Consejo Nacional de Drogas	Purchases Below the Threshold	ordinary process	21000	21000.02	0.02	05 5 2021	05 5 2021	0	Closed	11916	Abensa (Abreu Energía), SRL	Services	Male	Legal Person	12 29 2009	Outdated	Unknown	DISTRITO NACIONAL
223	Dirección General de Aduanas y Puertos	Exception Processes	air tickets, repairs and fuels	97305	104199.9	6894.9	01 2 2018	01 4 2018	2	Closed	32925	Talleres el Monumento, SRL	Services	Male	Legal Person	07 23 2013	Outdated	Unknown	DISTRITO NACIONAL
223	Dirección General de Aduanas y Puertos	Exception Processes	air tickets, repairs and fuels	124550	146969	22419	01 4 2018	01 4 2018	0	Closed	32925	Talleres el Monumento, SRL	Services	Male	Legal Person	07 23 2013	Outdated	Unknown	DISTRITO NACIONAL
223	Dirección General de Aduanas y Puertos	Exception Processes	air tickets, repairs and fuels	150650	177767	27117	01 12 2018	01 18 2018	6	Closed	32925	Talleres el Monumento, SRL	Services	Male	Legal Person	07 23 2013	Outdated	Unknown	DISTRITO NACIONAL
223	Dirección General de Aduanas y Puertos	Exception Processes	air tickets, repairs and fuels	234450	276651	42201	03 15 2018	03 19 2018	4	Closed	32925	Talleres el Monumento, SRL	Services	Male	Legal Person	07 23 2013	Outdated	Unknown	DISTRITO NACIONAL
223	Dirección General de Aduanas y Puertos	Exception Processes	air tickets, repairs and fuels	240140	283365.2	43225.2	03 15 2018	03 16 2018	1	Closed	32925	Talleres el Monumento, SRL	Services	Male	Legal Person	07 23 2013	Outdated	Unknown	DISTRITO NACIONAL
223	Dirección General de Aduanas y Puertos	Minor Purchases	ordinary process	638200	753076	114876	03 14 2018	03 26 2018	12	Closed	32925	Talleres el Monumento, SRL	Services	Male	Legal Person	07 23 2013	Outdated	Unknown	DISTRITO NACIONAL
223	Dirección General de Aduanas y Puertos	Exception Processes	air tickets, repairs and fuels	62500	73750	11250	03 26 2018	03 27 2018	1	Closed	32925	Talleres el Monumento, SRL	Services	Male	Legal Person	07 23 2013	Outdated	Unknown	DISTRITO NACIONAL
223	Dirección General de Aduanas y Puertos	Minor Purchases	ordinary process	260000	561680	301680	03 23 2018	05 30 2018	68	Closed	32925	Talleres el Monumento, SRL	Services	Male	Legal Person	07 23 2013	Outdated	Unknown	DISTRITO NACIONAL
223	Dirección General de Aduanas y Puertos	Exception Processes	air tickets, repairs and fuels	87805	103609.9	15804.9	04 4 2018	04 9 2018	5	Closed	32925	Talleres el Monumento, SRL	Services	Male	Legal Person	07 23 2013	Outdated	Unknown	DISTRITO NACIONAL
223	Dirección General de Aduanas y Puertos	Exception Processes	air tickets, repairs and fuels	209420	247115.6	37695.6	04 17 2018	04 18 2018	1	Closed	32925	Talleres el Monumento, SRL	Services	Male	Legal Person	07 23 2013	Outdated	Unknown	DISTRITO NACIONAL
223	Dirección General de Aduanas y Puertos	Exception Processes	air tickets, repairs and fuels	311120	367121.6	56001.6	04 20 2018	04 23 2018	3	Closed	32925	Talleres el Monumento, SRL	Services	Male	Legal Person	07 23 2013	Outdated	Unknown	DISTRITO NACIONAL
223	Dirección General de Aduanas y Puertos	Exception Processes	air tickets, repairs and fuels	415050	489759	74709	04 20 2018	04 23 2018	3	Closed	32925	Talleres el Monumento, SRL	Services	Male	Legal Person	07 23 2013	Outdated	Unknown	DISTRITO NACIONAL
223	Dirección General de Aduanas y Puertos	Exception Processes	air tickets, repairs and fuels	143150	168917	25767	04 20 2018	04 24 2018	4	Closed	32925	Talleres el Monumento, SRL	Services	Male	Legal Person	07 23 2013	Outdated	Unknown	DISTRITO NACIONAL
223	Dirección General de Aduanas y Puertos	Exception Processes	air tickets, repairs and fuels	285700	337126	51426	04 23 2018	04 25 2018	2	Closed	32925	Talleres el Monumento, SRL	Services	Male	Legal Person	07 23 2013	Outdated	Unknown	DISTRITO NACIONAL
223	Dirección General de Aduanas y Puertos	Minor Purchases	ordinary process	664800	784464	119664	04 23 2018	05 1 2018	8	Closed	32925	Talleres el Monumento, SRL	Services	Male	Legal Person	07 23 2013	Outdated	Unknown	DISTRITO NACIONAL
616	Ayuntamiento Santo Domingo Oeste	Exception Processes	air tickets, repairs and fuels	62200	73396	11196	06 7 2018	06 7 2018	0	Active	32925	Talleres el Monumento, SRL	Goods	Male	Legal Person	07 23 2013	Outdated	Unknown	DISTRITO NACIONAL
616	Ayuntamiento Santo Domingo Oeste	Exception Processes	air tickets, repairs and fuels	45280	53430.4	8150.4	06 7 2018	06 7 2018	0	Active	32925	Talleres el Monumento, SRL	Goods	Male	Legal Person	07 23 2013	Outdated	Unknown	DISTRITO NACIONAL
616	Ayuntamiento Santo Domingo Oeste	Exception Processes	air tickets, repairs and fuels	15850	18703	2853	06 11 2018	06 11 2018	0	Active	32925	Talleres el Monumento, SRL	Services	Male	Legal Person	07 23 2013	Outdated	Unknown	DISTRITO NACIONAL
223	Dirección General de Aduanas y Puertos	Minor Purchases	ordinary process	805000	899726.4	94726.4	06 14 2018	07 2 2018	18	Closed	32925	Talleres el Monumento, SRL	Services	Male	Legal Person	07 23 2013	Outdated	Unknown	DISTRITO NACIONAL
223	Dirección General de Aduanas y Puertos	Minor Purchases	ordinary process	805000	599.8176	-804400.1824	06 14 2018	07 2 2018	18	Cancelled	32925	Talleres el Monumento, SRL	Services	Male	Legal Person	07 23 2013	Outdated	Unknown	DISTRITO NACIONAL
227	Dirección General de Ganadería	Exception Processes	air tickets, repairs and fuels	186646.5	186646.5	0	06 26 2018	06 26 2018	0	Rescinded	32925	Talleres el Monumento, SRL	Services	Male	Legal Person	07 23 2013	Outdated	Unknown	DISTRITO NACIONAL
724	Instituto Agrario Dominicano	Exception Processes	air tickets, repairs and fuels	210000	209.214	-209790.786	06 27 2018	06 27 2018	0	Rescinded	32925	Talleres el Monumento, SRL	Services	Male	Legal Person	07 23 2013	Outdated	Unknown	DISTRITO NACIONAL
724	Instituto Agrario Dominicano	Exception Processes	air tickets, repairs and fuels	210000	209214	-786	06 28 2018	06 28 2018	0	Active	32925	Talleres el Monumento, SRL	Services	Male	Legal Person	07 23 2013	Outdated	Unknown	DISTRITO NACIONAL
227	Dirección General de Ganadería	Exception Processes	air tickets, repairs and fuels	200000	278568.5	78568.5	07 5 2018	07 5 2018	0	Active	32925	Talleres el Monumento, SRL	Services	Male	Legal Person	07 23 2013	Outdated	Unknown	DISTRITO NACIONAL
724	Instituto Agrario Dominicano	Exception Processes	air tickets, repairs and fuels	163700	193166	29466	07 10 2018	07 10 2018	0	Active	32925	Talleres el Monumento, SRL	Services	Male	Legal Person	07 23 2013	Outdated	Unknown	DISTRITO NACIONAL
724	Instituto Agrario Dominicano	Exception Processes	air tickets, repairs and fuels	250000	236165.2	-13834.8	07 10 2018	07 10 2018	0	Active	32925	Talleres el Monumento, SRL	Services	Male	Legal Person	07 23 2013	Outdated	Unknown	DISTRITO NACIONAL
724	Instituto Agrario Dominicano	Exception Processes	air tickets, repairs and fuels	250000	233758	-16242	07 11 2018	07 11 2018	0	Active	32925	Talleres el Monumento, SRL	Services	Male	Legal Person	07 23 2013	Outdated	Unknown	DISTRITO NACIONAL
724	Instituto Agrario Dominicano	Exception Processes	air tickets, repairs and fuels	250000	236	-249764	07 13 2018	07 13 2018	0	Rescinded	32925	Talleres el Monumento, SRL	Services	Male	Legal Person	07 23 2013	Outdated	Unknown	DISTRITO NACIONAL
724	Instituto Agrario Dominicano	Exception Processes	air tickets, repairs and fuels	210000	209804	-196	07 16 2018	07 16 2018	0	Active	32925	Talleres el Monumento, SRL	Services	Male	Legal Person	07 23 2013	Outdated	Unknown	DISTRITO NACIONAL
724	Instituto Agrario Dominicano	Exception Processes	air tickets, repairs and fuels	400000	354708	-45292	07 16 2018	07 16 2018	0	Modified	32925	Talleres el Monumento, SRL	Services	Male	Legal Person	07 23 2013	Outdated	Unknown	DISTRITO NACIONAL
724	Instituto Agrario Dominicano	Exception Processes	air tickets, repairs and fuels	250000	236000	-14000	07 16 2018	07 16 2018	0	Active	32925	Talleres el Monumento, SRL	Services	Male	Legal Person	07 23 2013	Outdated	Unknown	DISTRITO NACIONAL
724	Instituto Agrario Dominicano	Exception Processes	air tickets, repairs and fuels	75540.5	72540.5	-3000	07 17 2018	07 18 2018	1	Active	32925	Talleres el Monumento, SRL	Services	Male	Legal Person	07 23 2013	Outdated	Unknown	DISTRITO NACIONAL
724	Instituto Agrario Dominicano	Exception Processes	air tickets, repairs and fuels	101397	101397.4	0.4	07 19 2018	07 19 2018	0	Active	32925	Talleres el Monumento, SRL	Services	Male	Legal Person	07 23 2013	Outdated	Unknown	DISTRITO NACIONAL
724	Instituto Agrario Dominicano	Exception Processes	air tickets, repairs and fuels	57000	55755	-1245	07 20 2018	07 20 2018	0	Active	32925	Talleres el Monumento, SRL	Services	Male	Legal Person	07 23 2013	Outdated	Unknown	DISTRITO NACIONAL
724	Instituto Agrario Dominicano	Exception Processes	air tickets, repairs and fuels	53000	52215	-785	07 20 2018	07 20 2018	0	Active	32925	Talleres el Monumento, SRL	Services	Male	Legal Person	07 23 2013	Outdated	Unknown	DISTRITO NACIONAL
724	Instituto Agrario Dominicano	Exception Processes	air tickets, repairs and fuels	87000	86364.2	-635.8	07 23 2018	07 23 2018	0	Active	32925	Talleres el Monumento, SRL	Services	Male	Legal Person	07 23 2013	Outdated	Unknown	DISTRITO NACIONAL
724	Instituto Agrario Dominicano	Exception Processes	air tickets, repairs and fuels	87000	86364.2	-635.8	07 23 2018	07 23 2018	0	Cancelled	32925	Talleres el Monumento, SRL	Unknown	Male	Legal Person	07 23 2013	Outdated	Unknown	DISTRITO NACIONAL
724	Instituto Agrario Dominicano	Exception Processes	air tickets, repairs and fuels	170000	160969.7	-9030.3	07 26 2018	07 26 2018	0	Active	32925	Talleres el Monumento, SRL	Services	Male	Legal Person	07 23 2013	Outdated	Unknown	DISTRITO NACIONAL
227	Dirección General de Ganadería	Exception Processes	air tickets, repairs and fuels	200000	312788.5	112788.5	08 2 2018	08 2 2018	0	Active	32925	Talleres el Monumento, SRL	Services	Male	Legal Person	07 23 2013	Outdated	Unknown	DISTRITO NACIONAL
223	Dirección General de Aduanas y Puertos	Exception Processes	air tickets, repairs and fuels	10000000	399999.9999	-9600000	08 21 2018	08 21 2018	0	Cancelled	32925	Talleres el Monumento, SRL	Unknown	Male	Legal Person	07 23 2013	Outdated	Unknown	DISTRITO NACIONAL
223	Dirección General de Aduanas y Puertos	Exception Processes	air tickets, repairs and fuels	10000000	399999.9999	-9600000	08 21 2018	08 21 2018	0	Active	32925	Talleres el Monumento, SRL	Services	Male	Legal Person	07 23 2013	Outdated	Unknown	DISTRITO NACIONAL
223	Dirección General de Aduanas y Puertos	Purchases Below the Threshold	ordinary process	59800	70564	10764	09 3 2018	09 3 2018	0	Closed	32925	Talleres el Monumento, SRL	Services	Male	Legal Person	07 23 2013	Outdated	Unknown	DISTRITO NACIONAL
612	Empresa de Transmisión Eléctrica Dominicana	Purchases Below the Threshold	ordinary process	54634	39412	-15222	09 25 2018	12 18 2018	84	Active	32925	Talleres el Monumento, SRL	Services	Male	Legal Person	07 23 2013	Outdated	Unknown	DISTRITO NACIONAL
227	Dirección General de Ganadería	Purchases Below the Threshold	ordinary process	30857	30857	0	10 18 2018	10 18 2018	0	Active	32925	Talleres el Monumento, SRL	Services	Male	Legal Person	07 23 2013	Outdated	Unknown	DISTRITO NACIONAL
223	Dirección General de Aduanas y Puertos	Exception Processes	single provider	717600	846768	129168	10 22 2018	10 22 2018	0	Closed	32925	Talleres el Monumento, SRL	Services	Male	Legal Person	07 23 2013	Outdated	Unknown	DISTRITO NACIONAL
227	Dirección General de Ganadería	Purchases Below the Threshold	ordinary process	16700	19706	3006	11 21 2018	11 21 2018	0	Active	32925	Talleres el Monumento, SRL	Goods	Male	Legal Person	07 23 2013	Outdated	Unknown	DISTRITO NACIONAL
612	Empresa de Transmisión Eléctrica Dominicana	Minor Purchases	ordinary process	207739	136933.1	-70805.9	12 10 2018	12 19 2018	9	Active	32925	Talleres el Monumento, SRL	Services	Male	Legal Person	07 23 2013	Outdated	Unknown	DISTRITO NACIONAL
612	Empresa de Transmisión Eléctrica Dominicana	Minor Purchases	ordinary process	532062	266975	-265087	12 28 2018	04 23 2019	116	Closed	32925	Talleres el Monumento, SRL	Services	Male	Legal Person	07 23 2013	Outdated	Unknown	DISTRITO NACIONAL
580	Empresa de Generación Hidroélectrica Dominicana	Purchases Below the Threshold	ordinary process	50000	33984	-16016	02 4 2019	02 5 2019	1	Closed	32925	Talleres el Monumento, SRL	Services	Male	Legal Person	07 23 2013	Outdated	Unknown	DISTRITO NACIONAL
580	Empresa de Generación Hidroélectrica Dominicana	Minor Purchases	ordinary process	425000	327450	-97550	02 26 2019	03 5 2019	7	Closed	32925	Talleres el Monumento, SRL	Goods	Male	Legal Person	07 23 2013	Outdated	Unknown	DISTRITO NACIONAL
174	Ministerio de la Mujer	Price Comparison	ordinary process	2855000	2393040	-461960	02 22 2019	03 11 2019	17	Active	32925	Talleres el Monumento, SRL	Services	Male	Legal Person	07 23 2013	Outdated	Unknown	DISTRITO NACIONAL
612	Empresa de Transmisión Eléctrica Dominicana	Minor Purchases	ordinary process	536634.5	132514	-404120.5	02 26 2019	06 4 2019	98	In edition	32925	Talleres el Monumento, SRL	Services	Male	Legal Person	07 23 2013	Outdated	Unknown	DISTRITO NACIONAL
612	Empresa de Transmisión Eléctrica Dominicana	Minor Purchases	ordinary process	284144	35518	-248626	03 7 2019	06 14 2019	99	Closed	32925	Talleres el Monumento, SRL	Services	Male	Legal Person	07 23 2013	Outdated	Unknown	DISTRITO NACIONAL
612	Empresa de Transmisión Eléctrica Dominicana	Minor Purchases	ordinary process	284144	38940	-245204	03 7 2019	06 14 2019	99	Closed	32925	Talleres el Monumento, SRL	Services	Male	Legal Person	07 23 2013	Outdated	Unknown	DISTRITO NACIONAL
612	Empresa de Transmisión Eléctrica Dominicana	Minor Purchases	ordinary process	284144	16638	-267506	03 7 2019	06 14 2019	99	Closed	32925	Talleres el Monumento, SRL	Services	Male	Legal Person	07 23 2013	Outdated	Unknown	DISTRITO NACIONAL
612	Empresa de Transmisión Eléctrica Dominicana	Minor Purchases	ordinary process	1000000	127440	-872560	03 13 2019	06 13 2019	92	Active	32925	Talleres el Monumento, SRL	Services	Male	Legal Person	07 23 2013	Outdated	Unknown	DISTRITO NACIONAL
612	Empresa de Transmisión Eléctrica Dominicana	Minor Purchases	ordinary process	1000000	166734	-833266	03 13 2019	06 13 2019	92	Active	32925	Talleres el Monumento, SRL	Services	Male	Legal Person	07 23 2013	Outdated	Unknown	DISTRITO NACIONAL
612	Empresa de Transmisión Eléctrica Dominicana	Minor Purchases	ordinary process	300000	24898	-275102	03 13 2019	06 13 2019	92	Approved flow	32925	Talleres el Monumento, SRL	Services	Male	Legal Person	07 23 2013	Outdated	Unknown	DISTRITO NACIONAL
223	Dirección General de Aduanas y Puertos	Minor Purchases	ordinary process	205000	317125	112125	03 14 2019	03 28 2019	14	Closed	32925	Talleres el Monumento, SRL	Services	Male	Legal Person	07 23 2013	Outdated	Unknown	DISTRITO NACIONAL
580	Empresa de Generación Hidroélectrica Dominicana	Minor Purchases	ordinary process	793900	737559	-56341	03 27 2019	04 1 2019	5	Closed	32925	Talleres el Monumento, SRL	Services	Male	Legal Person	07 23 2013	Outdated	Unknown	DISTRITO NACIONAL
223	Dirección General de Aduanas y Puertos	National Public Tender	ordinary process	15000000	1500000	-13500000	02 14 2019	06 26 2019	132	Rescinded	32925	Talleres el Monumento, SRL	Services	Male	Legal Person	07 23 2013	Outdated	Unknown	DISTRITO NACIONAL
612	Empresa de Transmisión Eléctrica Dominicana	Minor Purchases	ordinary process	275580	41654	-233926	04 2 2019	04 30 2019	28	Rescinded	32925	Talleres el Monumento, SRL	Services	Male	Legal Person	07 23 2013	Outdated	Unknown	DISTRITO NACIONAL
889	Consejo Nac Reglamentación y Fomento Industria Lechera	Purchases Below the Threshold	ordinary process	25000	32249.4	7249.4	04 8 2019	04 9 2019	1	Active	32925	Talleres el Monumento, SRL	Services	Male	Legal Person	07 23 2013	Outdated	Unknown	DISTRITO NACIONAL
223	Dirección General de Aduanas y Puertos	Purchases Below the Threshold	ordinary process	21000	16000	-5000	04 11 2019	04 12 2019	1	Closed	32925	Talleres el Monumento, SRL	Services	Male	Legal Person	07 23 2013	Outdated	Unknown	DISTRITO NACIONAL
591	Superintendencia de Salud y Riesgos Laborales	Purchases Below the Threshold	ordinary process	137000	132171.8	-4828.2	04 11 2019	06 24 2019	74	Closed	32925	Talleres el Monumento, SRL	Services	Male	Legal Person	07 23 2013	Outdated	Unknown	DISTRITO NACIONAL
580	Empresa de Generación Hidroélectrica Dominicana	Purchases Below the Threshold	ordinary process	110000	108241.4	-1758.6	04 22 2019	04 23 2019	1	Closed	32925	Talleres el Monumento, SRL	Services	Male	Legal Person	07 23 2013	Outdated	Unknown	DISTRITO NACIONAL
889	Consejo Nac Reglamentación y Fomento Industria Lechera	Purchases Below the Threshold	ordinary process	67026	74168.9	7142.9	04 24 2019	04 25 2019	1	Active	32925	Talleres el Monumento, SRL	Services	Male	Legal Person	07 23 2013	Outdated	Unknown	DISTRITO NACIONAL
580	Empresa de Generación Hidroélectrica Dominicana	Minor Purchases	ordinary process	282000	302965	20965	05 6 2019	05 10 2019	4	Closed	32925	Talleres el Monumento, SRL	Services	Male	Legal Person	07 23 2013	Outdated	Unknown	DISTRITO NACIONAL
724	Instituto Agrario Dominicano	Purchases Below the Threshold	ordinary process	129000	128797	-203	05 14 2019	05 14 2019	0	Active	32925	Talleres el Monumento, SRL	Services	Male	Legal Person	07 23 2013	Outdated	Unknown	DISTRITO NACIONAL
889	Consejo Nac Reglamentación y Fomento Industria Lechera	Minor Purchases	ordinary process	180000	160338.4	-19661.6	05 16 2019	05 27 2019	11	Active	32925	Talleres el Monumento, SRL	Services	Male	Legal Person	07 23 2013	Outdated	Unknown	DISTRITO NACIONAL
580	Empresa de Generación Hidroélectrica Dominicana	National Public Tender	ordinary process	19500000.02	8250088	-11249912.02	04 3 2019	07 31 2019	119	Active	32925	Talleres el Monumento, SRL	Services	Male	Legal Person	07 23 2013	Outdated	Unknown	DISTRITO NACIONAL
580	Empresa de Generación Hidroélectrica Dominicana	National Public Tender	ordinary process	19500000.02	5841000	-13659000.02	04 3 2019	07 31 2019	119	Active	32925	Talleres el Monumento, SRL	Services	Male	Legal Person	07 23 2013	Outdated	Unknown	DISTRITO NACIONAL
580	Empresa de Generación Hidroélectrica Dominicana	Purchases Below the Threshold	ordinary process	46000	42515.4	-3484.6	05 21 2019	05 21 2019	0	Closed	32925	Talleres el Monumento, SRL	Goods	Male	Legal Person	07 23 2013	Outdated	Unknown	DISTRITO NACIONAL
724	Instituto Agrario Dominicano	Purchases Below the Threshold	ordinary process	78200	78021.6	-178.4	05 23 2019	05 24 2019	1	Active	32925	Talleres el Monumento, SRL	Services	Male	Legal Person	07 23 2013	Outdated	Unknown	DISTRITO NACIONAL
223	Dirección General de Aduanas y Puertos	Purchases Below the Threshold	ordinary process	38800	45784	6984	05 24 2019	05 27 2019	3	Rescinded	32925	Talleres el Monumento, SRL	Services	Male	Legal Person	07 23 2013	Outdated	Unknown	DISTRITO NACIONAL
724	Instituto Agrario Dominicano	Purchases Below the Threshold	ordinary process	73000	72924	-76	05 29 2019	05 29 2019	0	Active	32925	Talleres el Monumento, SRL	Services	Male	Legal Person	07 23 2013	Outdated	Unknown	DISTRITO NACIONAL
612	Empresa de Transmisión Eléctrica Dominicana	Minor Purchases	ordinary process	186676	161542	-25134	05 27 2019	05 31 2019	4	Closed	32925	Talleres el Monumento, SRL	Services	Male	Legal Person	07 23 2013	Outdated	Unknown	DISTRITO NACIONAL
612	Empresa de Transmisión Eléctrica Dominicana	Minor Purchases	ordinary process	380048	159300	-220748	05 28 2019	07 31 2019	64	Closed	32925	Talleres el Monumento, SRL	Services	Male	Legal Person	07 23 2013	Outdated	Unknown	DISTRITO NACIONAL
612	Empresa de Transmisión Eléctrica Dominicana	Minor Purchases	ordinary process	380048	44840	-335208	05 28 2019	06 27 2019	30	Closed	32925	Talleres el Monumento, SRL	Services	Male	Legal Person	07 23 2013	Outdated	Unknown	DISTRITO NACIONAL
724	Instituto Agrario Dominicano	National Public Tender	ordinary process	18899930	2081520	-16818410	05 7 2019	07 16 2019	70	Active	32925	Talleres el Monumento, SRL	Services	Male	Legal Person	07 23 2013	Outdated	Unknown	DISTRITO NACIONAL
889	Consejo Nac Reglamentación y Fomento Industria Lechera	Purchases Below the Threshold	ordinary process	130000	89680	-40320	06 21 2019	06 21 2019	0	Active	32925	Talleres el Monumento, SRL	Goods	Male	Legal Person	07 23 2013	Outdated	Unknown	DISTRITO NACIONAL
580	Empresa de Generación Hidroélectrica Dominicana	Minor Purchases	ordinary process	215000	202901	-12099	07 3 2019	07 11 2019	8	Active	32925	Talleres el Monumento, SRL	Services	Male	Legal Person	07 23 2013	Outdated	Unknown	DISTRITO NACIONAL
889	Consejo Nac Reglamentación y Fomento Industria Lechera	Purchases Below the Threshold	ordinary process	3850	7239.3	3389.3	07 15 2019	07 31 2019	16	Active	32925	Talleres el Monumento, SRL	Services	Male	Legal Person	07 23 2013	Outdated	Unknown	DISTRITO NACIONAL
612	Empresa de Transmisión Eléctrica Dominicana	Minor Purchases	ordinary process	530056	148857	-381199	07 15 2019	07 18 2019	3	In edition	32925	Talleres el Monumento, SRL	Services	Male	Legal Person	07 23 2013	Outdated	Unknown	DISTRITO NACIONAL
889	Consejo Nac Reglamentación y Fomento Industria Lechera	Purchases Below the Threshold	ordinary process	15000	23600	8600	07 19 2019	07 31 2019	12	Active	32925	Talleres el Monumento, SRL	Goods	Male	Legal Person	07 23 2013	Outdated	Unknown	DISTRITO NACIONAL
889	Consejo Nac Reglamentación y Fomento Industria Lechera	Purchases Below the Threshold	ordinary process	32000	14868	-17132	07 22 2019	07 31 2019	9	Active	32925	Talleres el Monumento, SRL	Goods	Male	Legal Person	07 23 2013	Outdated	Unknown	DISTRITO NACIONAL
580	Empresa de Generación Hidroélectrica Dominicana	Purchases Below the Threshold	ordinary process	80000	68440	-11560	08 2 2019	08 2 2019	0	Closed	32925	Talleres el Monumento, SRL	Services	Male	Legal Person	07 23 2013	Outdated	Unknown	DISTRITO NACIONAL
580	Empresa de Generación Hidroélectrica Dominicana	Minor Purchases	ordinary process	240800	235410	-5390	07 31 2019	08 13 2019	13	Closed	32925	Talleres el Monumento, SRL	Services	Male	Legal Person	07 23 2013	Outdated	Unknown	DISTRITO NACIONAL
889	Consejo Nac Reglamentación y Fomento Industria Lechera	Purchases Below the Threshold	ordinary process	3900	6295.3	2395.3	08 22 2019	09 3 2019	12	Active	32925	Talleres el Monumento, SRL	Services	Male	Legal Person	07 23 2013	Outdated	Unknown	DISTRITO NACIONAL
612	Empresa de Transmisión Eléctrica Dominicana	Purchases Below the Threshold	ordinary process	108796	58528	-50268	08 29 2019	09 10 2019	12	Closed	32925	Talleres el Monumento, SRL	Services	Male	Legal Person	07 23 2013	Outdated	Unknown	DISTRITO NACIONAL
889	Consejo Nac Reglamentación y Fomento Industria Lechera	Purchases Below the Threshold	ordinary process	15000	15694	694	09 4 2019	09 23 2019	19	Approved flow	32925	Talleres el Monumento, SRL	Goods	Male	Legal Person	07 23 2013	Outdated	Unknown	DISTRITO NACIONAL
612	Empresa de Transmisión Eléctrica Dominicana	Minor Purchases	ordinary process	411684.3	16638	-395046.3	09 4 2019	09 10 2019	6	Closed	32925	Talleres el Monumento, SRL	Services	Male	Legal Person	07 23 2013	Outdated	Unknown	DISTRITO NACIONAL
612	Empresa de Transmisión Eléctrica Dominicana	Purchases Below the Threshold	ordinary process	120596	32037	-88559	09 9 2019	09 11 2019	2	Closed	32925	Talleres el Monumento, SRL	Services	Male	Legal Person	07 23 2013	Outdated	Unknown	DISTRITO NACIONAL
612	Empresa de Transmisión Eléctrica Dominicana	Purchases Below the Threshold	ordinary process	96170	49619	-46551	09 18 2019	10 2 2019	14	Rescinded	32925	Talleres el Monumento, SRL	Services	Male	Legal Person	07 23 2013	Outdated	Unknown	DISTRITO NACIONAL
612	Empresa de Transmisión Eléctrica Dominicana	Minor Purchases	ordinary process	219952	28438	-191514	09 18 2019	10 4 2019	16	In edition	32925	Talleres el Monumento, SRL	Services	Male	Legal Person	07 23 2013	Outdated	Unknown	DISTRITO NACIONAL
612	Empresa de Transmisión Eléctrica Dominicana	Purchases Below the Threshold	ordinary process	101362	16933	-84429	10 9 2019	10 14 2019	5	Closed	32925	Talleres el Monumento, SRL	Services	Male	Legal Person	07 23 2013	Outdated	Unknown	DISTRITO NACIONAL
612	Empresa de Transmisión Eléctrica Dominicana	Purchases Below the Threshold	ordinary process	24999.99	41890	16890.01	10 28 2019	11 5 2019	8	Closed	32925	Talleres el Monumento, SRL	Goods	Male	Legal Person	07 23 2013	Outdated	Unknown	DISTRITO NACIONAL
174	Ministerio de la Mujer	Price Comparison	ordinary process	1250000	1143420	-106580	11 12 2019	12 3 2019	21	Active	32925	Talleres el Monumento, SRL	Services	Male	Legal Person	07 23 2013	Outdated	Unknown	DISTRITO NACIONAL
612	Empresa de Transmisión Eléctrica Dominicana	Minor Purchases	ordinary process	699032	229958.4	-469073.6	11 27 2019	12 11 2019	14	Approved flow	32925	Talleres el Monumento, SRL	Services	Male	Legal Person	07 23 2013	Outdated	Unknown	DISTRITO NACIONAL
612	Empresa de Transmisión Eléctrica Dominicana	Minor Purchases	ordinary process	699032	141600	-557432	11 27 2019	12 11 2019	14	Approved flow	32925	Talleres el Monumento, SRL	Services	Male	Legal Person	07 23 2013	Outdated	Unknown	DISTRITO NACIONAL
612	Empresa de Transmisión Eléctrica Dominicana	Minor Purchases	ordinary process	699032	136148.4	-562883.6	11 27 2019	12 11 2019	14	Approved flow	32925	Talleres el Monumento, SRL	Services	Male	Legal Person	07 23 2013	Outdated	Unknown	DISTRITO NACIONAL
612	Empresa de Transmisión Eléctrica Dominicana	Minor Purchases	ordinary process	699032	102707.2	-596324.8	11 27 2019	12 11 2019	14	Approved flow	32925	Talleres el Monumento, SRL	Services	Male	Legal Person	07 23 2013	Outdated	Unknown	DISTRITO NACIONAL
612	Empresa de Transmisión Eléctrica Dominicana	Minor Purchases	ordinary process	200010	186204	-13806	12 4 2019	12 11 2019	7	Closed	32925	Talleres el Monumento, SRL	Services	Male	Legal Person	07 23 2013	Outdated	Unknown	DISTRITO NACIONAL
612	Empresa de Transmisión Eléctrica Dominicana	Minor Purchases	ordinary process	323792	113280	-210512	12 9 2019	12 26 2019	17	Rescinded	32925	Talleres el Monumento, SRL	Services	Male	Legal Person	07 23 2013	Outdated	Unknown	DISTRITO NACIONAL
612	Empresa de Transmisión Eléctrica Dominicana	Minor Purchases	ordinary process	283554	258656	-24898	12 12 2019	12 18 2019	6	Closed	32925	Talleres el Monumento, SRL	Services	Male	Legal Person	07 23 2013	Outdated	Unknown	DISTRITO NACIONAL
612	Empresa de Transmisión Eléctrica Dominicana	Minor Purchases	ordinary process	172781.5	69700.24	-103081.26	12 12 2019	12 27 2019	15	Closed	32925	Talleres el Monumento, SRL	Services	Male	Legal Person	07 23 2013	Outdated	Unknown	DISTRITO NACIONAL
612	Empresa de Transmisión Eléctrica Dominicana	Minor Purchases	ordinary process	234023.5	51094	-182929.5	12 12 2019	01 9 2020	28	Closed	32925	Talleres el Monumento, SRL	Services	Male	Legal Person	07 23 2013	Outdated	Unknown	DISTRITO NACIONAL
889	Consejo Nac Reglamentación y Fomento Industria Lechera	Purchases Below the Threshold	ordinary process	13000	15340	2340	01 22 2020	01 22 2020	0	Active	32925	Talleres el Monumento, SRL	Goods	Male	Legal Person	07 23 2013	Outdated	Unknown	DISTRITO NACIONAL
889	Consejo Nac Reglamentación y Fomento Industria Lechera	Purchases Below the Threshold	ordinary process	15750	18585	2835	01 22 2020	01 22 2020	0	Active	32925	Talleres el Monumento, SRL	Goods	Male	Legal Person	07 23 2013	Outdated	Unknown	DISTRITO NACIONAL
612	Empresa de Transmisión Eléctrica Dominicana	Minor Purchases	ordinary process	317951	15458	-302493	01 23 2020	02 5 2020	13	In edition	32925	Talleres el Monumento, SRL	Services	Male	Legal Person	07 23 2013	Outdated	Unknown	DISTRITO NACIONAL
612	Empresa de Transmisión Eléctrica Dominicana	Purchases Below the Threshold	ordinary process	63926	59755.2	-4170.8	01 23 2020	01 29 2020	6	Closed	32925	Talleres el Monumento, SRL	Services	Male	Legal Person	07 23 2013	Outdated	Unknown	DISTRITO NACIONAL
612	Empresa de Transmisión Eléctrica Dominicana	Purchases Below the Threshold	ordinary process	115784	47849	-67935	02 7 2020	03 4 2020	26	Closed	32925	Talleres el Monumento, SRL	Services	Male	Legal Person	07 23 2013	Outdated	Unknown	DISTRITO NACIONAL
612	Empresa de Transmisión Eléctrica Dominicana	Minor Purchases	ordinary process	236000	207680	-28320	02 25 2020	03 4 2020	8	In edition	32925	Talleres el Monumento, SRL	Services	Male	Legal Person	07 23 2013	Outdated	Unknown	DISTRITO NACIONAL
889	Consejo Nac Reglamentación y Fomento Industria Lechera	Purchases Below the Threshold	ordinary process	5550	6549	999	03 5 2020	03 6 2020	1	Active	32925	Talleres el Monumento, SRL	Goods	Male	Legal Person	07 23 2013	Outdated	Unknown	DISTRITO NACIONAL
591	Superintendencia de Salud y Riesgos Laborales	Purchases Below the Threshold	ordinary process	65000	49660.3	-15339.7	03 5 2020	05 29 2020	85	Closed	32925	Talleres el Monumento, SRL	Services	Male	Legal Person	07 23 2013	Outdated	Unknown	DISTRITO NACIONAL
612	Empresa de Transmisión Eléctrica Dominicana	Minor Purchases	ordinary process	899160	794730	-104430	03 16 2020	04 27 2020	42	Rescinded	32925	Talleres el Monumento, SRL	Services	Male	Legal Person	07 23 2013	Outdated	Unknown	DISTRITO NACIONAL
612	Empresa de Transmisión Eléctrica Dominicana	Minor Purchases	ordinary process	223556.81	208954.3056	-14602.5044	05 20 2020	06 8 2020	19	Active	32925	Talleres el Monumento, SRL	Services	Male	Legal Person	07 23 2013	Outdated	Unknown	DISTRITO NACIONAL
174	Ministerio de la Mujer	Price Comparison	ordinary process	2500000	34751	-2465249	06 1 2020	06 30 2020	29	Active	32925	Talleres el Monumento, SRL	Services	Male	Legal Person	07 23 2013	Outdated	Unknown	DISTRITO NACIONAL
889	Consejo Nac Reglamentación y Fomento Industria Lechera	Purchases Below the Threshold	ordinary process	38050	44899	6849	08 19 2020	08 19 2020	0	Active	32925	Talleres el Monumento, SRL	Goods	Male	Legal Person	07 23 2013	Outdated	Unknown	DISTRITO NACIONAL
936	Instituto Nacional de Migración	Purchases Below the Threshold	ordinary process	5128.21	5128.221	0.011	01 2 2018	01 2 2018	0	Active	256	Almacenes Unidos, S.A.S	Goods	Male	Legal Person	11 29 2005	Active	Unknown	DISTRITO NACIONAL
171	Ejército de República Dominicana	Purchases Below the Threshold	ordinary process	7320	6865.004	-454.996	01 2 2018	01 2 2018	0	In edition	256	Almacenes Unidos, S.A.S	Goods	Male	Legal Person	11 29 2005	Active	Unknown	DISTRITO NACIONAL
171	Ejército de República Dominicana	Purchases Below the Threshold	ordinary process	2300	1719.85	-580.15	01 4 2018	01 4 2018	0	In edition	256	Almacenes Unidos, S.A.S	Goods	Male	Legal Person	11 29 2005	Active	Unknown	DISTRITO NACIONAL
171	Ejército de República Dominicana	Purchases Below the Threshold	ordinary process	6500	6865.004	365.004	01 4 2018	01 4 2018	0	In edition	256	Almacenes Unidos, S.A.S	Goods	Male	Legal Person	11 29 2005	Active	Unknown	DISTRITO NACIONAL
862	HOSPITAL TRAUMATOLOGICO DR. NEY ARIAS LORA	Purchases Below the Threshold	ordinary process	2169.49	2559.9982	390.5082	01 15 2018	01 15 2018	0	Cancelled	256	Almacenes Unidos, S.A.S	Unknown	Male	Legal Person	11 29 2005	Active	Unknown	DISTRITO NACIONAL
635	Instituto Nacional de Aguas Potables y Alcantarillados	Minor Purchases	ordinary process	99250	9276.157	-89973.843	03 8 2018	03 23 2018	15	Cancelled	256	Almacenes Unidos, S.A.S	Unknown	Male	Legal Person	11 29 2005	Active	Unknown	DISTRITO NACIONAL
635	Instituto Nacional de Aguas Potables y Alcantarillados	Minor Purchases	ordinary process	99250	30858.357	-68391.643	03 8 2018	03 23 2018	15	Cancelled	256	Almacenes Unidos, S.A.S	Unknown	Male	Legal Person	11 29 2005	Active	Unknown	DISTRITO NACIONAL
635	Instituto Nacional de Aguas Potables y Alcantarillados	Minor Purchases	ordinary process	99250	9276.157	-89973.843	03 8 2018	04 9 2018	32	Active	256	Almacenes Unidos, S.A.S	Goods	Male	Legal Person	11 29 2005	Active	Unknown	DISTRITO NACIONAL
862	HOSPITAL TRAUMATOLOGICO DR. NEY ARIAS LORA	Purchases Below the Threshold	ordinary process	35465.98	41849.8564	6383.8764	03 22 2018	03 22 2018	0	Approved flow	256	Almacenes Unidos, S.A.S	Goods	Male	Legal Person	11 29 2005	Active	Unknown	DISTRITO NACIONAL
637	Superintendencia de Electricidad	Purchases Below the Threshold	ordinary process	1500	1364.9886	-135.0114	03 26 2018	03 26 2018	0	Active	256	Almacenes Unidos, S.A.S	Goods	Male	Legal Person	11 29 2005	Active	Unknown	DISTRITO NACIONAL
837	Parque Zoológico Nacional	Purchases Below the Threshold	ordinary process	120100	11945.0102	-108154.9898	04 12 2018	04 12 2018	0	Active	256	Almacenes Unidos, S.A.S	Goods	Male	Legal Person	11 29 2005	Active	Unknown	DISTRITO NACIONAL
837	Parque Zoológico Nacional	Purchases Below the Threshold	ordinary process	120100	11945.0102	-108154.9898	04 12 2018	04 12 2018	0	Cancelled	256	Almacenes Unidos, S.A.S	Unknown	Male	Legal Person	11 29 2005	Active	Unknown	DISTRITO NACIONAL
171	Ejército de República Dominicana	Purchases Below the Threshold	ordinary process	5100	5380.9888	280.9888	04 23 2018	04 23 2018	0	Approved flow	256	Almacenes Unidos, S.A.S	Goods	Male	Legal Person	11 29 2005	Active	Unknown	DISTRITO NACIONAL
171	Ejército de República Dominicana	Purchases Below the Threshold	ordinary process	6889.83	8129.9994	1240.1694	04 24 2018	04 24 2018	0	Approved flow	256	Almacenes Unidos, S.A.S	Goods	Male	Legal Person	11 29 2005	Active	Unknown	DISTRITO NACIONAL
247	Oficina para el Reordenamiento del Transporte	Purchases Below the Threshold	ordinary process	106569	63658.9232	-42910.0768	04 25 2018	04 25 2018	0	Closed	256	Almacenes Unidos, S.A.S	Goods	Male	Legal Person	11 29 2005	Active	Unknown	DISTRITO NACIONAL
171	Ejército de República Dominicana	Purchases Below the Threshold	ordinary process	5500	5460.0016	-39.9984	04 26 2018	04 26 2018	0	Approved flow	256	Almacenes Unidos, S.A.S	Goods	Male	Legal Person	11 29 2005	Active	Unknown	DISTRITO NACIONAL
637	Superintendencia de Electricidad	Purchases Below the Threshold	ordinary process	29913.36	35319.0048	5405.6448	05 1 2018	05 1 2018	0	Active	256	Almacenes Unidos, S.A.S	Goods	Male	Legal Person	11 29 2005	Active	Unknown	DISTRITO NACIONAL
171	Ejército de República Dominicana	Purchases Below the Threshold	ordinary process	3030	2985	-45	05 1 2018	05 1 2018	0	Approved flow	256	Almacenes Unidos, S.A.S	Goods	Male	Legal Person	11 29 2005	Active	Unknown	DISTRITO NACIONAL
635	Instituto Nacional de Aguas Potables y Alcantarillados	Purchases Below the Threshold	ordinary process	31543.75281	28811.9656	-2731.78721	05 4 2018	05 14 2018	10	Rescinded	256	Almacenes Unidos, S.A.S	Goods	Male	Legal Person	11 29 2005	Active	Unknown	DISTRITO NACIONAL
699	Consejo Nacional de Investigaciones Agropecuarias y Forestales	Purchases Below the Threshold	ordinary process	5000	3794.998	-1205.002	05 10 2018	05 11 2018	1	Approved flow	256	Almacenes Unidos, S.A.S	Goods	Male	Legal Person	11 29 2005	Active	Unknown	DISTRITO NACIONAL
554	Junta de Aviación Civil	Purchases Below the Threshold	ordinary process	22000	21945.0264	-54.9736	05 16 2018	05 16 2018	0	Active	256	Almacenes Unidos, S.A.S	Goods	Male	Legal Person	11 29 2005	Active	Unknown	DISTRITO NACIONAL
554	Junta de Aviación Civil	Purchases Below the Threshold	ordinary process	5353	6294.0728	941.0728	05 25 2018	05 25 2018	0	Active	256	Almacenes Unidos, S.A.S	Goods	Male	Legal Person	11 29 2005	Active	Unknown	DISTRITO NACIONAL
140	Oficina de Ingenieros Supervisores de Obras del Estado B&S	Purchases Below the Threshold	ordinary process	68822.87	20322.9984	-48499.8716	05 29 2018	05 29 2018	0	Active	256	Almacenes Unidos, S.A.S	Goods	Male	Legal Person	11 29 2005	Active	Unknown	DISTRITO NACIONAL
862	HOSPITAL TRAUMATOLOGICO DR. NEY ARIAS LORA	Purchases Below the Threshold	ordinary process	2030.52	2396.0136	365.4936	05 29 2018	06 1 2018	3	Approved flow	256	Almacenes Unidos, S.A.S	Goods	Male	Legal Person	11 29 2005	Active	Unknown	DISTRITO NACIONAL
909	Comisión Nacional de Energía	Purchases Below the Threshold	ordinary process	21000	20515.008	-484.992	06 6 2018	06 8 2018	2	Active	256	Almacenes Unidos, S.A.S	Goods	Male	Legal Person	11 29 2005	Active	Unknown	DISTRITO NACIONAL
699	Consejo Nacional de Investigaciones Agropecuarias y Forestales	Purchases Below the Threshold	ordinary process	5000	4175.017	-824.983	06 8 2018	06 8 2018	0	Approved flow	256	Almacenes Unidos, S.A.S	Goods	Male	Legal Person	11 29 2005	Active	Unknown	DISTRITO NACIONAL
905	Dirección de Fomento y Desarrollo de la Artesanía Nacional	Purchases Below the Threshold	ordinary process	40570	39737.326	-832.674	06 28 2018	06 28 2018	0	Closed	256	Almacenes Unidos, S.A.S	Goods	Male	Legal Person	11 29 2005	Active	Unknown	DISTRITO NACIONAL
691	Corporación Estatal de Radio y Televisión	Purchases Below the Threshold	ordinary process	10100	10385.003	285.003	07 4 2018	07 6 2018	2	Active	256	Almacenes Unidos, S.A.S	Goods	Male	Legal Person	11 29 2005	Active	Unknown	DISTRITO NACIONAL
856	INSTITUTO NACIONAL DE BIENESTAR ESTUDIANTIL	Purchases Below the Threshold	ordinary process	92900	92824.7071	-75.2929	07 10 2018	07 10 2018	0	In edition	256	Almacenes Unidos, S.A.S	Goods	Male	Legal Person	11 29 2005	Active	Unknown	DISTRITO NACIONAL
699	Consejo Nacional de Investigaciones Agropecuarias y Forestales	Purchases Below the Threshold	ordinary process	11000	9705.0044	-1294.9956	07 16 2018	07 16 2018	0	Active	256	Almacenes Unidos, S.A.S	Goods	Male	Legal Person	11 29 2005	Active	Unknown	DISTRITO NACIONAL
554	Junta de Aviación Civil	Purchases Below the Threshold	ordinary process	59760	69097.6494	9337.6494	08 8 2018	08 9 2018	1	Active	256	Almacenes Unidos, S.A.S	Goods	Male	Legal Person	11 29 2005	Active	Unknown	DISTRITO NACIONAL
909	Comisión Nacional de Energía	Purchases Below the Threshold	ordinary process	9000	7245.0112	-1754.9888	08 9 2018	08 10 2018	1	Closed	256	Almacenes Unidos, S.A.S	Goods	Male	Legal Person	11 29 2005	Active	Unknown	DISTRITO NACIONAL
140	Oficina de Ingenieros Supervisores de Obras del Estado B&S	Purchases Below the Threshold	ordinary process	44000	52400.496	8400.496	08 23 2018	08 23 2018	0	Cancelled	256	Almacenes Unidos, S.A.S	Unknown	Male	Legal Person	11 29 2005	Active	Unknown	DISTRITO NACIONAL
554	Junta de Aviación Civil	Purchases Below the Threshold	ordinary process	6192	7075.0204	883.0204	09 6 2018	09 6 2018	0	Active	256	Almacenes Unidos, S.A.S	Goods	Male	Legal Person	11 29 2005	Active	Unknown	DISTRITO NACIONAL
637	Superintendencia de Electricidad	Purchases Below the Threshold	ordinary process	23568	25230.5712	1662.5712	09 12 2018	09 12 2018	0	In edition	256	Almacenes Unidos, S.A.S	Goods	Male	Legal Person	11 29 2005	Active	Unknown	DISTRITO NACIONAL
699	Consejo Nacional de Investigaciones Agropecuarias y Forestales	Purchases Below the Threshold	ordinary process	4400	4165.99	-234.01	09 18 2018	09 18 2018	0	Flow in approval	256	Almacenes Unidos, S.A.S	Goods	Male	Legal Person	11 29 2005	Active	Unknown	DISTRITO NACIONAL
670	Instituto Nacional de Auxilios y Viviendas	Purchases Below the Threshold	ordinary process	120055	120054.9464	-0.0536	09 19 2018	09 19 2018	0	Active	256	Almacenes Unidos, S.A.S	Goods	Male	Legal Person	11 29 2005	Active	Unknown	DISTRITO NACIONAL
637	Superintendencia de Electricidad	Purchases Below the Threshold	ordinary process	78000	5785.0208	-72214.9792	09 21 2018	09 21 2018	0	Active	256	Almacenes Unidos, S.A.S	Goods	Male	Legal Person	11 29 2005	Active	Unknown	DISTRITO NACIONAL
862	HOSPITAL TRAUMATOLOGICO DR. NEY ARIAS LORA	Purchases Below the Threshold	ordinary process	13200	14339.9736	1139.9736	09 21 2018	09 25 2018	4	Approved flow	256	Almacenes Unidos, S.A.S	Goods	Male	Legal Person	11 29 2005	Active	Unknown	DISTRITO NACIONAL
206	Dirección General de Desarrollo Comunidad	Purchases Below the Threshold	ordinary process	76702.55	90509.009	13806.459	09 26 2018	10 9 2018	13	Active	256	Almacenes Unidos, S.A.S	Goods	Male	Legal Person	11 29 2005	Active	Unknown	DISTRITO NACIONAL
637	Superintendencia de Electricidad	Purchases Below the Threshold	ordinary process	28560	18375.1134	-10184.8866	09 27 2018	09 27 2018	0	Active	256	Almacenes Unidos, S.A.S	Goods	Male	Legal Person	11 29 2005	Active	Unknown	DISTRITO NACIONAL
255	Consejo Nacional Promoción y Apoyo Micro, Pequeña y Mediana Empresa	Purchases Below the Threshold	ordinary process	18000	16560.002	-1439.998	10 11 2018	10 11 2018	0	Closed	256	Almacenes Unidos, S.A.S	Goods	Male	Legal Person	11 29 2005	Active	Unknown	DISTRITO NACIONAL
637	Superintendencia de Electricidad	Purchases Below the Threshold	ordinary process	37200	36695.0146	-504.9854	10 11 2018	10 15 2018	4	Active	256	Almacenes Unidos, S.A.S	Goods	Male	Legal Person	11 29 2005	Active	Unknown	DISTRITO NACIONAL
1006	Mercados Dominicanos de Abasto Agropecuario	Purchases Below the Threshold	ordinary process	31100	49040	17940	10 19 2018	10 23 2018	4	Active	256	Almacenes Unidos, S.A.S	Goods	Male	Legal Person	11 29 2005	Active	Unknown	DISTRITO NACIONAL
909	Comisión Nacional de Energía	Purchases Below the Threshold	ordinary process	10000	3545.0032	-6454.9968	10 22 2018	10 23 2018	1	Closed	256	Almacenes Unidos, S.A.S	Goods	Male	Legal Person	11 29 2005	Active	Unknown	DISTRITO NACIONAL
856	INSTITUTO NACIONAL DE BIENESTAR ESTUDIANTIL	Minor Purchases	ordinary process	189674.6	163713.79	-25960.81	10 23 2018	11 7 2018	15	In edition	256	Almacenes Unidos, S.A.S	Goods	Male	Legal Person	11 29 2005	Active	Unknown	DISTRITO NACIONAL
1006	Mercados Dominicanos de Abasto Agropecuario	Purchases Below the Threshold	ordinary process	51200	54119.048	2919.048	10 25 2018	10 26 2018	1	Active	256	Almacenes Unidos, S.A.S	Goods	Male	Legal Person	11 29 2005	Active	Unknown	DISTRITO NACIONAL
622	Instituto Postal Dominicano	Purchases Below the Threshold	ordinary process	97303.98	66656.1586	-30647.8214	11 2 2018	11 2 2018	0	Active	256	Almacenes Unidos, S.A.S	Goods	Male	Legal Person	11 29 2005	Active	Unknown	DISTRITO NACIONAL
909	Comisión Nacional de Energía	Purchases Below the Threshold	ordinary process	15000	14529.989	-470.011	11 13 2018	11 13 2018	0	Closed	256	Almacenes Unidos, S.A.S	Goods	Male	Legal Person	11 29 2005	Active	Unknown	DISTRITO NACIONAL
255	Consejo Nacional Promoción y Apoyo Micro, Pequeña y Mediana Empresa	Purchases Below the Threshold	ordinary process	44000	43950.28	-49.72	11 15 2018	11 15 2018	0	Closed	256	Almacenes Unidos, S.A.S	Goods	Male	Legal Person	11 29 2005	Active	Unknown	DISTRITO NACIONAL
846	DIRECCION GENERAL DE COMUNICACION	Minor Purchases	ordinary process	125000	10385.18	-114614.82	11 30 2018	12 19 2018	19	Active	256	Almacenes Unidos, S.A.S	Goods	Male	Legal Person	11 29 2005	Active	Unknown	DISTRITO NACIONAL
856	INSTITUTO NACIONAL DE BIENESTAR ESTUDIANTIL	Minor Purchases	ordinary process	456661.3	136566.887	-320094.413	11 20 2018	11 30 2018	10	Cancelled	256	Almacenes Unidos, S.A.S	Unknown	Male	Legal Person	11 29 2005	Active	Unknown	DISTRITO NACIONAL
856	INSTITUTO NACIONAL DE BIENESTAR ESTUDIANTIL	Minor Purchases	ordinary process	456661.3	5175	-451486.3	11 20 2018	12 3 2018	13	In edition	256	Almacenes Unidos, S.A.S	Goods	Male	Legal Person	11 29 2005	Active	Unknown	DISTRITO NACIONAL
856	INSTITUTO NACIONAL DE BIENESTAR ESTUDIANTIL	Minor Purchases	ordinary process	456661.3	136566.887	-320094.413	11 20 2018	12 3 2018	13	In edition	256	Almacenes Unidos, S.A.S	Goods	Male	Legal Person	11 29 2005	Active	Unknown	DISTRITO NACIONAL
828	Liga Municipal Dominicana	Purchases Below the Threshold	ordinary process	76663.29	84674.0034	8010.7134	11 26 2018	12 5 2018	9	Closed	256	Almacenes Unidos, S.A.S	Goods	Male	Legal Person	11 29 2005	Active	Unknown	DISTRITO NACIONAL
209	Comisión Presidencial Apoyo Desarrollo Provincial	Purchases Below the Threshold	ordinary process	16250	16250	0	12 3 2018	12 3 2018	0	Rescinded	256	Almacenes Unidos, S.A.S	Goods	Male	Legal Person	11 29 2005	Active	Unknown	DISTRITO NACIONAL
862	HOSPITAL TRAUMATOLOGICO DR. NEY ARIAS LORA	Purchases Below the Threshold	ordinary process	11419.49	13474.9982	2055.5082	12 5 2018	12 6 2018	1	In edition	256	Almacenes Unidos, S.A.S	Goods	Male	Legal Person	11 29 2005	Active	Unknown	DISTRITO NACIONAL
209	Comisión Presidencial Apoyo Desarrollo Provincial	Purchases Below the Threshold	ordinary process	16000	16228.0444	228.0444	12 6 2018	12 6 2018	0	Active	256	Almacenes Unidos, S.A.S	Goods	Male	Legal Person	11 29 2005	Active	Unknown	DISTRITO NACIONAL
905	Dirección de Fomento y Desarrollo de la Artesanía Nacional	Purchases Below the Threshold	ordinary process	12087	12087.0114	0.0114	12 10 2018	12 11 2018	1	Active	256	Almacenes Unidos, S.A.S	Goods	Male	Legal Person	11 29 2005	Active	Unknown	DISTRITO NACIONAL
846	DIRECCION GENERAL DE COMUNICACION	Purchases Below the Threshold	ordinary process	50055.1	59065.018	9009.918	12 13 2018	12 13 2018	0	Closed	256	Almacenes Unidos, S.A.S	Goods	Male	Legal Person	11 29 2005	Active	Unknown	DISTRITO NACIONAL
699	Consejo Nacional de Investigaciones Agropecuarias y Forestales	Purchases Below the Threshold	ordinary process	38300	36531.0244	-1768.9756	12 21 2018	12 21 2018	0	Active	256	Almacenes Unidos, S.A.S	Goods	Male	Legal Person	11 29 2005	Active	Unknown	DISTRITO NACIONAL
670	Instituto Nacional de Auxilios y Viviendas	Purchases Below the Threshold	ordinary process	17707.65	20895.027	3187.377	12 28 2018	12 31 2018	3	Active	256	Almacenes Unidos, S.A.S	Goods	Male	Legal Person	11 29 2005	Active	Unknown	DISTRITO NACIONAL
909	Comisión Nacional de Energía	Purchases Below the Threshold	ordinary process	3999.99	3450.0132	-549.9768	01 16 2019	01 17 2019	1	Closed	256	Almacenes Unidos, S.A.S	Goods	Male	Legal Person	11 29 2005	Active	Unknown	DISTRITO NACIONAL
837	Parque Zoológico Nacional	Purchases Below the Threshold	ordinary process	15000	8294.9988	-6705.0012	01 25 2019	01 25 2019	0	Closed	256	Almacenes Unidos, S.A.S	Goods	Male	Legal Person	11 29 2005	Active	Unknown	DISTRITO NACIONAL
909	Comisión Nacional de Energía	Purchases Below the Threshold	ordinary process	4000	3644.843	-355.157	02 11 2019	02 11 2019	0	Closed	256	Almacenes Unidos, S.A.S	Goods	Male	Legal Person	11 29 2005	Active	Unknown	DISTRITO NACIONAL
554	Junta de Aviación Civil	Purchases Below the Threshold	ordinary process	31150	32047.7734	897.7734	02 12 2019	02 12 2019	0	Closed	256	Almacenes Unidos, S.A.S	Goods	Male	Legal Person	11 29 2005	Active	Unknown	DISTRITO NACIONAL
554	Junta de Aviación Civil	Purchases Below the Threshold	ordinary process	5800	6448.0038	648.0038	02 19 2019	02 21 2019	2	Closed	256	Almacenes Unidos, S.A.S	Goods	Male	Legal Person	11 29 2005	Active	Unknown	DISTRITO NACIONAL
637	Superintendencia de Electricidad	Purchases Below the Threshold	ordinary process	11000	9589.934	-1410.066	03 20 2019	03 22 2019	2	Closed	256	Almacenes Unidos, S.A.S	Goods	Male	Legal Person	11 29 2005	Active	Unknown	DISTRITO NACIONAL
909	Comisión Nacional de Energía	Purchases Below the Threshold	ordinary process	25000	28850.0324	3850.0324	03 20 2019	03 26 2019	6	Rescinded	256	Almacenes Unidos, S.A.S	Goods	Male	Legal Person	11 29 2005	Active	Unknown	DISTRITO NACIONAL
676	Departamento Aeroportuario	Purchases Below the Threshold	ordinary process	49500	42983.8836	-6516.1164	03 22 2019	03 27 2019	5	Rescinded	256	Almacenes Unidos, S.A.S	Goods	Male	Legal Person	11 29 2005	Active	Unknown	DISTRITO NACIONAL
637	Superintendencia de Electricidad	Purchases Below the Threshold	ordinary process	13000.02	12637.8	-362.22	03 27 2019	03 27 2019	0	Active	256	Almacenes Unidos, S.A.S	Goods	Male	Legal Person	11 29 2005	Active	Unknown	DISTRITO NACIONAL
622	Instituto Postal Dominicano	Purchases Below the Threshold	ordinary process	100005	97200.081	-2804.919	04 1 2019	04 1 2019	0	Closed	256	Almacenes Unidos, S.A.S	Goods	Male	Legal Person	11 29 2005	Active	Unknown	DISTRITO NACIONAL
909	Comisión Nacional de Energía	Purchases Below the Threshold	ordinary process	5000.04	3974.9598	-1025.0802	04 1 2019	04 2 2019	1	Closed	256	Almacenes Unidos, S.A.S	Goods	Male	Legal Person	11 29 2005	Active	Unknown	DISTRITO NACIONAL
622	Instituto Postal Dominicano	Purchases Below the Threshold	ordinary process	104784	102893.994	-1890.006	04 3 2019	04 4 2019	1	Active	256	Almacenes Unidos, S.A.S	Goods	Male	Legal Person	11 29 2005	Active	Unknown	DISTRITO NACIONAL
846	DIRECCION GENERAL DE COMUNICACION	Minor Purchases	ordinary process	527837	21399.005	-506437.995	04 5 2019	04 12 2019	7	Closed	256	Almacenes Unidos, S.A.S	Goods	Male	Legal Person	11 29 2005	Active	Unknown	DISTRITO NACIONAL
909	Comisión Nacional de Energía	Purchases Below the Threshold	ordinary process	14000	9734.9882	-4265.0118	04 12 2019	04 15 2019	3	Closed	256	Almacenes Unidos, S.A.S	Goods	Male	Legal Person	11 29 2005	Active	Unknown	DISTRITO NACIONAL
616	Ayuntamiento Santo Domingo Oeste	Minor Purchases	ordinary process	310164.41	20881.3862	-289283.0238	04 12 2019	04 23 2019	11	Active	256	Almacenes Unidos, S.A.S	Goods	Male	Legal Person	11 29 2005	Active	Unknown	DISTRITO NACIONAL
846	DIRECCION GENERAL DE COMUNICACION	Purchases Below the Threshold	ordinary process	15372.03	18140.14	2768.11	04 17 2019	04 22 2019	5	Closed	256	Almacenes Unidos, S.A.S	Goods	Male	Legal Person	11 29 2005	Active	Unknown	DISTRITO NACIONAL
699	Consejo Nacional de Investigaciones Agropecuarias y Forestales	Purchases Below the Threshold	ordinary process	19000	18180.0004	-819.9996	04 23 2019	04 24 2019	1	Closed	256	Almacenes Unidos, S.A.S	Services	Male	Legal Person	11 29 2005	Active	Unknown	DISTRITO NACIONAL
691	Corporación Estatal de Radio y Televisión	Purchases Below the Threshold	ordinary process	41200	41170.2	-29.8	04 22 2019	04 25 2019	3	Cancelled	256	Almacenes Unidos, S.A.S	Goods	Male	Legal Person	11 29 2005	Active	Unknown	DISTRITO NACIONAL
691	Corporación Estatal de Radio y Televisión	Purchases Below the Threshold	ordinary process	41200	39220.0494	-1979.9506	04 22 2019	04 30 2019	8	Active	256	Almacenes Unidos, S.A.S	Goods	Male	Legal Person	11 29 2005	Active	Unknown	DISTRITO NACIONAL
928	HOSPITAL PEDIATRICO DR. HUGO DE MENDOZA	Purchases Below the Threshold	ordinary process	8000	5940.12	-2059.88	05 15 2019	05 15 2019	0	In edition	256	Almacenes Unidos, S.A.S	Goods	Male	Legal Person	11 29 2005	Active	Unknown	DISTRITO NACIONAL
939	Ofic. Nac. de Ev. Sísmica y Vulnerabilidad de Infr. y Edificaciones	Purchases Below the Threshold	ordinary process	7950	7950.014	0.014	05 16 2019	05 16 2019	0	Rescinded	256	Almacenes Unidos, S.A.S	Goods	Male	Legal Person	11 29 2005	Active	Unknown	DISTRITO NACIONAL
862	HOSPITAL TRAUMATOLOGICO DR. NEY ARIAS LORA	Purchases Below the Threshold	ordinary process	1200	1295.0028	95.0028	05 17 2019	05 22 2019	5	Active	256	Almacenes Unidos, S.A.S	Goods	Male	Legal Person	11 29 2005	Active	Unknown	DISTRITO NACIONAL
637	Superintendencia de Electricidad	Purchases Below the Threshold	ordinary process	9000	8435.0058	-564.9942	05 22 2019	05 22 2019	0	Active	256	Almacenes Unidos, S.A.S	Goods	Male	Legal Person	11 29 2005	Active	Unknown	DISTRITO NACIONAL
928	HOSPITAL PEDIATRICO DR. HUGO DE MENDOZA	Purchases Below the Threshold	ordinary process	12500	12499.976	-0.024	05 28 2019	05 29 2019	1	In edition	256	Almacenes Unidos, S.A.S	Goods	Male	Legal Person	11 29 2005	Active	Unknown	DISTRITO NACIONAL
809	Superintendencia de Valores	Purchases Below the Threshold	ordinary process	3725	3725.0004	0.0004	06 4 2019	06 5 2019	1	Closed	256	Almacenes Unidos, S.A.S	Goods	Male	Legal Person	11 29 2005	Active	Unknown	DISTRITO NACIONAL
622	Instituto Postal Dominicano	Purchases Below the Threshold	ordinary process	137234	131529.9508	-5704.0492	06 11 2019	06 14 2019	3	Flow in approval	256	Almacenes Unidos, S.A.S	Goods	Male	Legal Person	11 29 2005	Active	Unknown	DISTRITO NACIONAL
637	Superintendencia de Electricidad	Purchases Below the Threshold	ordinary process	4000	3951.9946	-48.0054	06 21 2019	06 24 2019	3	Active	256	Almacenes Unidos, S.A.S	Goods	Male	Legal Person	11 29 2005	Active	Unknown	DISTRITO NACIONAL
637	Superintendencia de Electricidad	Purchases Below the Threshold	ordinary process	6500.9	5919.2387	-581.6613	06 25 2019	06 25 2019	0	Active	256	Almacenes Unidos, S.A.S	Goods	Male	Legal Person	11 29 2005	Active	Unknown	DISTRITO NACIONAL
928	HOSPITAL PEDIATRICO DR. HUGO DE MENDOZA	Purchases Below the Threshold	ordinary process	8078	7656.9728	-421.0272	06 28 2019	08 14 2019	47	In edition	256	Almacenes Unidos, S.A.S	Goods	Male	Legal Person	11 29 2005	Active	Unknown	DISTRITO NACIONAL
909	Comisión Nacional de Energía	Purchases Below the Threshold	ordinary process	11100	11098.9974	-1.0026	07 4 2019	07 8 2019	4	Closed	256	Almacenes Unidos, S.A.S	Goods	Male	Legal Person	11 29 2005	Active	Unknown	DISTRITO NACIONAL
1006	Mercados Dominicanos de Abasto Agropecuario	Purchases Below the Threshold	ordinary process	27680	15311.9868	-12368.0132	07 10 2019	07 11 2019	1	Closed	256	Almacenes Unidos, S.A.S	Goods	Male	Legal Person	11 29 2005	Active	Unknown	DISTRITO NACIONAL
1006	Mercados Dominicanos de Abasto Agropecuario	Purchases Below the Threshold	ordinary process	7999.92	6390.054	-1609.866	07 11 2019	07 11 2019	0	Closed	256	Almacenes Unidos, S.A.S	Goods	Male	Legal Person	11 29 2005	Active	Unknown	DISTRITO NACIONAL
637	Superintendencia de Electricidad	Purchases Below the Threshold	ordinary process	32001.1	31253.952	-747.148	07 16 2019	07 16 2019	0	Closed	256	Almacenes Unidos, S.A.S	Goods	Male	Legal Person	11 29 2005	Active	Unknown	DISTRITO NACIONAL
554	Junta de Aviación Civil	Purchases Below the Threshold	ordinary process	33914	35501.9638	1587.9638	07 18 2019	07 18 2019	0	Closed	256	Almacenes Unidos, S.A.S	Goods	Male	Legal Person	11 29 2005	Active	Unknown	DISTRITO NACIONAL
667	Dirección General de Ordenamiento y Desarrollo Territorial	Purchases Below the Threshold	ordinary process	36737.4	43350.132	6612.732	07 24 2019	07 24 2019	0	Rescinded	256	Almacenes Unidos, S.A.S	Goods	Male	Legal Person	11 29 2005	Active	Unknown	DISTRITO NACIONAL
554	Junta de Aviación Civil	Purchases Below the Threshold	ordinary process	40800	42640.0434	1840.0434	07 25 2019	07 25 2019	0	Closed	256	Almacenes Unidos, S.A.S	Goods	Male	Legal Person	11 29 2005	Active	Unknown	DISTRITO NACIONAL
637	Superintendencia de Electricidad	Purchases Below the Threshold	ordinary process	2500	1975.0014	-524.9986	07 29 2019	07 30 2019	1	Closed	256	Almacenes Unidos, S.A.S	Goods	Male	Legal Person	11 29 2005	Active	Unknown	DISTRITO NACIONAL
872	Organismo Dominicano de Acreditación	Purchases Below the Threshold	ordinary process	26109.06	23347.9992	-2761.0608	07 30 2019	07 30 2019	0	Closed	256	Almacenes Unidos, S.A.S	Goods	Male	Legal Person	11 29 2005	Active	Unknown	DISTRITO NACIONAL
251	Ministerio de Industria, Comercio y Mipymes	Purchases Below the Threshold	ordinary process	11457.06	13519.3308	2062.2708	08 2 2019	08 2 2019	0	Closed	256	Almacenes Unidos, S.A.S	Goods	Male	Legal Person	11 29 2005	Active	Unknown	DISTRITO NACIONAL
928	HOSPITAL PEDIATRICO DR. HUGO DE MENDOZA	Purchases Below the Threshold	ordinary process	17210	9802.6612	-7407.3388	08 2 2019	08 12 2019	10	In edition	256	Almacenes Unidos, S.A.S	Goods	Male	Legal Person	11 29 2005	Active	Unknown	DISTRITO NACIONAL
698	Empresa de Distribución Eléctrica del Norte	Purchases Below the Threshold	ordinary process	53435	53435.002	0.002	08 5 2019	08 7 2019	2	Cancelled	256	Almacenes Unidos, S.A.S	Unknown	Male	Legal Person	11 29 2005	Active	Unknown	DISTRITO NACIONAL
676	Departamento Aeroportuario	Purchases Below the Threshold	ordinary process	15000	13295.001	-1704.999	08 15 2019	08 15 2019	0	Closed	256	Almacenes Unidos, S.A.S	Goods	Male	Legal Person	11 29 2005	Active	Unknown	DISTRITO NACIONAL
675	Consejo Estatal del Azucar	Purchases Below the Threshold	ordinary process	8700	9213.558	513.558	08 21 2019	08 23 2019	2	Active	256	Almacenes Unidos, S.A.S	Goods	Male	Legal Person	11 29 2005	Active	Unknown	DISTRITO NACIONAL
1006	Mercados Dominicanos de Abasto Agropecuario	Purchases Below the Threshold	ordinary process	9000	7967.9358	-1032.0642	08 22 2019	08 23 2019	1	Closed	256	Almacenes Unidos, S.A.S	Goods	Male	Legal Person	11 29 2005	Active	Unknown	DISTRITO NACIONAL
617	AYUNTAMIENTO DISTRITO NACIONAL	Minor Purchases	ordinary process	615000	260997.12	-354002.88	08 22 2019	09 23 2019	32	Cancelled	256	Almacenes Unidos, S.A.S	Unknown	Male	Legal Person	11 29 2005	Active	Unknown	DISTRITO NACIONAL
637	Superintendencia de Electricidad	Purchases Below the Threshold	ordinary process	8000	6000	-2000	08 27 2019	08 28 2019	1	Active	256	Almacenes Unidos, S.A.S	Goods	Male	Legal Person	11 29 2005	Active	Unknown	DISTRITO NACIONAL
637	Superintendencia de Electricidad	Purchases Below the Threshold	ordinary process	3000	2842.9976	-157.0024	08 27 2019	08 28 2019	1	Active	256	Almacenes Unidos, S.A.S	Goods	Male	Legal Person	11 29 2005	Active	Unknown	DISTRITO NACIONAL
909	Comisión Nacional de Energía	Purchases Below the Threshold	ordinary process	13000	13700.036	700.036	08 27 2019	09 9 2019	13	Closed	256	Almacenes Unidos, S.A.S	Goods	Male	Legal Person	11 29 2005	Active	Unknown	DISTRITO NACIONAL
622	Instituto Postal Dominicano	Purchases Below the Threshold	ordinary process	8457.6	7165.019	-1292.581	08 30 2019	09 6 2019	7	Flow in approval	256	Almacenes Unidos, S.A.S	Goods	Male	Legal Person	11 29 2005	Active	Unknown	DISTRITO NACIONAL
637	Superintendencia de Electricidad	Purchases Below the Threshold	ordinary process	5000	3818.067	-1181.933	09 9 2019	09 9 2019	0	Active	256	Almacenes Unidos, S.A.S	Goods	Male	Legal Person	11 29 2005	Active	Unknown	DISTRITO NACIONAL
905	Dirección de Fomento y Desarrollo de la Artesanía Nacional	Purchases Below the Threshold	ordinary process	40111.1	39745.0196	-366.0804	09 10 2019	09 11 2019	1	Closed	256	Almacenes Unidos, S.A.S	Goods	Male	Legal Person	11 29 2005	Active	Unknown	DISTRITO NACIONAL
928	HOSPITAL PEDIATRICO DR. HUGO DE MENDOZA	Purchases Below the Threshold	ordinary process	24150	21240	-2910	09 16 2019	09 17 2019	1	In edition	256	Almacenes Unidos, S.A.S	Goods	Male	Legal Person	11 29 2005	Active	Unknown	DISTRITO NACIONAL
622	Instituto Postal Dominicano	Purchases Below the Threshold	ordinary process	50976	49769.9692	-1206.0308	09 20 2019	09 20 2019	0	Active	256	Almacenes Unidos, S.A.S	Goods	Male	Legal Person	11 29 2005	Active	Unknown	DISTRITO NACIONAL
652	Banco Agrícola de la República Dominicana	Purchases Below the Threshold	ordinary process	3500	3388.0042	-111.9958	09 23 2019	09 27 2019	4	Closed	256	Almacenes Unidos, S.A.S	Goods	Male	Legal Person	11 29 2005	Active	Unknown	DISTRITO NACIONAL
703	Oficina Presidencial de Tecnologias de la Información y Comunicación	Purchases Below the Threshold	ordinary process	107400	111205.0172	3805.0172	09 23 2019	09 23 2019	0	Closed	256	Almacenes Unidos, S.A.S	Goods	Male	Legal Person	11 29 2005	Active	Unknown	DISTRITO NACIONAL
699	Consejo Nacional de Investigaciones Agropecuarias y Forestales	Purchases Below the Threshold	ordinary process	18390	18037.067	-352.933	09 25 2019	09 27 2019	2	Closed	256	Almacenes Unidos, S.A.S	Goods	Male	Legal Person	11 29 2005	Active	Unknown	DISTRITO NACIONAL
928	HOSPITAL PEDIATRICO DR. HUGO DE MENDOZA	Purchases Below the Threshold	ordinary process	7600	6589.9932	-1010.0068	09 27 2019	10 1 2019	4	In edition	256	Almacenes Unidos, S.A.S	Goods	Male	Legal Person	11 29 2005	Active	Unknown	DISTRITO NACIONAL
1006	Mercados Dominicanos de Abasto Agropecuario	Purchases Below the Threshold	ordinary process	6800	5745.0011	-1054.9989	10 2 2019	10 4 2019	2	Rescinded	256	Almacenes Unidos, S.A.S	Goods	Male	Legal Person	11 29 2005	Active	Unknown	DISTRITO NACIONAL
637	Superintendencia de Electricidad	Purchases Below the Threshold	ordinary process	3500	2995.0052	-504.9948	10 7 2019	10 7 2019	0	Active	256	Almacenes Unidos, S.A.S	Goods	Male	Legal Person	11 29 2005	Active	Unknown	DISTRITO NACIONAL
251	Ministerio de Industria, Comercio y Mipymes	Purchases Below the Threshold	ordinary process	16413.58	14687.9556	-1725.6244	10 8 2019	10 8 2019	0	Active	256	Almacenes Unidos, S.A.S	Goods	Male	Legal Person	11 29 2005	Active	Unknown	DISTRITO NACIONAL
909	Comisión Nacional de Energía	Purchases Below the Threshold	ordinary process	15000	13140.0552	-1859.9448	10 17 2019	10 18 2019	1	Closed	256	Almacenes Unidos, S.A.S	Goods	Male	Legal Person	11 29 2005	Active	Unknown	DISTRITO NACIONAL
622	Instituto Postal Dominicano	Purchases Below the Threshold	ordinary process	28646.27	31141.0614	2494.7914	10 22 2019	10 23 2019	1	Flow in approval	256	Almacenes Unidos, S.A.S	Goods	Male	Legal Person	11 29 2005	Active	Unknown	DISTRITO NACIONAL
1006	Mercados Dominicanos de Abasto Agropecuario	Purchases Below the Threshold	ordinary process	14000	8189.9906	-5810.0094	10 22 2019	10 23 2019	1	Closed	256	Almacenes Unidos, S.A.S	Goods	Male	Legal Person	11 29 2005	Active	Unknown	DISTRITO NACIONAL
909	Comisión Nacional de Energía	Purchases Below the Threshold	ordinary process	100000	71995	-28005	10 23 2019	10 24 2019	1	Closed	256	Almacenes Unidos, S.A.S	Goods	Male	Legal Person	11 29 2005	Active	Unknown	DISTRITO NACIONAL
1006	Mercados Dominicanos de Abasto Agropecuario	Purchases Below the Threshold	ordinary process	13000	10995.004	-2004.996	10 23 2019	10 28 2019	5	Closed	256	Almacenes Unidos, S.A.S	Goods	Male	Legal Person	11 29 2005	Active	Unknown	DISTRITO NACIONAL
660	Fondo Patrimonial para las Empresas Reformadas	Purchases Below the Threshold	ordinary process	9000	8485.7458	-514.2542	11 1 2019	11 1 2019	0	Rescinded	256	Almacenes Unidos, S.A.S	Goods	Male	Legal Person	11 29 2005	Active	Unknown	DISTRITO NACIONAL
637	Superintendencia de Electricidad	Purchases Below the Threshold	ordinary process	24000	31169.9832	7169.9832	11 5 2019	11 5 2019	0	Closed	256	Almacenes Unidos, S.A.S	Goods	Male	Legal Person	11 29 2005	Active	Unknown	DISTRITO NACIONAL
803	Oficina de Cooperación Internacional	Purchases Below the Threshold	ordinary process	32320	43391.963	11071.963	11 5 2019	11 18 2019	13	Approved flow	256	Almacenes Unidos, S.A.S	Goods	Male	Legal Person	11 29 2005	Active	Unknown	DISTRITO NACIONAL
909	Comisión Nacional de Energía	Purchases Below the Threshold	ordinary process	20000.04	17455.74	-2544.3	11 6 2019	11 13 2019	7	Closed	256	Almacenes Unidos, S.A.S	Goods	Male	Legal Person	11 29 2005	Active	Unknown	DISTRITO NACIONAL
928	HOSPITAL PEDIATRICO DR. HUGO DE MENDOZA	Purchases Below the Threshold	ordinary process	10150	9073.9404	-1076.0596	11 11 2019	11 11 2019	0	In edition	256	Almacenes Unidos, S.A.S	Goods	Male	Legal Person	11 29 2005	Active	Unknown	DISTRITO NACIONAL
255	Consejo Nacional Promoción y Apoyo Micro, Pequeña y Mediana Empresa	Purchases Below the Threshold	ordinary process	35000.01	32985.012	-2014.998	11 11 2019	11 11 2019	0	Closed	256	Almacenes Unidos, S.A.S	Goods	Male	Legal Person	11 29 2005	Active	Unknown	DISTRITO NACIONAL
928	HOSPITAL PEDIATRICO DR. HUGO DE MENDOZA	Purchases Below the Threshold	ordinary process	23630	22201.936	-1428.064	11 11 2019	11 12 2019	1	In edition	256	Almacenes Unidos, S.A.S	Goods	Male	Legal Person	11 29 2005	Active	Unknown	DISTRITO NACIONAL
637	Superintendencia de Electricidad	Purchases Below the Threshold	ordinary process	59020	53551.0786	-5468.9214	11 11 2019	11 12 2019	1	Closed	256	Almacenes Unidos, S.A.S	Goods	Male	Legal Person	11 29 2005	Active	Unknown	DISTRITO NACIONAL
652	Banco Agrícola de la República Dominicana	Purchases Below the Threshold	ordinary process	84050	83621.0776	-428.9224	11 12 2019	11 20 2019	8	Closed	256	Almacenes Unidos, S.A.S	Goods	Male	Legal Person	11 29 2005	Active	Unknown	DISTRITO NACIONAL
905	Dirección de Fomento y Desarrollo de la Artesanía Nacional	Purchases Below the Threshold	ordinary process	30369.74	30257.2178	-112.5222	11 18 2019	11 19 2019	1	Closed	256	Almacenes Unidos, S.A.S	Goods	Male	Legal Person	11 29 2005	Active	Unknown	DISTRITO NACIONAL
814	Dirección General de Cine	Purchases Below the Threshold	ordinary process	9396.01	9396.0096	-0.0004	11 20 2019	11 20 2019	0	Suspended	256	Almacenes Unidos, S.A.S	Services	Male	Legal Person	11 29 2005	Active	Unknown	DISTRITO NACIONAL
675	Consejo Estatal del Azucar	Minor Purchases	ordinary process	326550	172955.0072	-153594.9928	11 25 2019	12 17 2019	22	Active	256	Almacenes Unidos, S.A.S	Goods	Male	Legal Person	11 29 2005	Active	Unknown	DISTRITO NACIONAL
675	Consejo Estatal del Azucar	Minor Purchases	ordinary process	326550	139501.2756	-187048.7244	11 25 2019	12 11 2019	16	Cancelled	256	Almacenes Unidos, S.A.S	Goods	Male	Legal Person	11 29 2005	Active	Unknown	DISTRITO NACIONAL
675	Consejo Estatal del Azucar	Purchases Below the Threshold	ordinary process	57771.05	40769.767	-17001.283	11 26 2019	12 2 2019	6	Rescinded	256	Almacenes Unidos, S.A.S	Goods	Male	Legal Person	11 29 2005	Active	Unknown	DISTRITO NACIONAL
226	Ministerio de Agricultura	Purchases Below the Threshold	ordinary process	49330	54753.6638	5423.6638	12 3 2019	12 11 2019	8	Active	256	Almacenes Unidos, S.A.S	Goods	Male	Legal Person	11 29 2005	Active	Unknown	DISTRITO NACIONAL
905	Dirección de Fomento y Desarrollo de la Artesanía Nacional	Purchases Below the Threshold	ordinary process	19268.5	19329.6508	61.1508	12 10 2019	12 11 2019	1	Closed	256	Almacenes Unidos, S.A.S	Goods	Male	Legal Person	11 29 2005	Active	Unknown	DISTRITO NACIONAL
905	Dirección de Fomento y Desarrollo de la Artesanía Nacional	Purchases Below the Threshold	ordinary process	50611.02	47972.9	-2638.12	12 10 2019	12 11 2019	1	Closed	256	Almacenes Unidos, S.A.S	Goods	Male	Legal Person	11 29 2005	Active	Unknown	DISTRITO NACIONAL
675	Consejo Estatal del Azucar	Purchases Below the Threshold	ordinary process	14072.08	46046.9276	31974.8476	12 11 2019	12 16 2019	5	Active	256	Almacenes Unidos, S.A.S	Goods	Male	Legal Person	11 29 2005	Active	Unknown	DISTRITO NACIONAL
699	Consejo Nacional de Investigaciones Agropecuarias y Forestales	Purchases Below the Threshold	ordinary process	29816	24259.0536	-5556.9464	12 12 2019	12 12 2019	0	Closed	256	Almacenes Unidos, S.A.S	Goods	Male	Legal Person	11 29 2005	Active	Unknown	DISTRITO NACIONAL
905	Dirección de Fomento y Desarrollo de la Artesanía Nacional	Purchases Below the Threshold	ordinary process	6985	6984.9982	-0.0018	12 13 2019	12 17 2019	4	Closed	256	Almacenes Unidos, S.A.S	Goods	Male	Legal Person	11 29 2005	Active	Unknown	DISTRITO NACIONAL
251	Ministerio de Industria, Comercio y Mipymes	Purchases Below the Threshold	ordinary process	6000	6295.005	295.005	12 23 2019	12 23 2019	0	Closed	256	Almacenes Unidos, S.A.S	Services	Male	Legal Person	11 29 2005	Active	Unknown	DISTRITO NACIONAL
637	Superintendencia de Electricidad	Purchases Below the Threshold	ordinary process	15000	14624.625	-375.375	01 8 2020	01 9 2020	1	Closed	256	Almacenes Unidos, S.A.S	Goods	Male	Legal Person	11 29 2005	Active	Unknown	DISTRITO NACIONAL
928	HOSPITAL PEDIATRICO DR. HUGO DE MENDOZA	Purchases Below the Threshold	ordinary process	15464	17135.7712	1671.7712	01 9 2020	01 14 2020	5	In edition	256	Almacenes Unidos, S.A.S	Goods	Male	Legal Person	11 29 2005	Active	Unknown	DISTRITO NACIONAL
674	Superintendencia de Pensiones	Purchases Below the Threshold	ordinary process	12000	11495.0054	-504.9946	01 17 2020	01 17 2020	0	Closed	256	Almacenes Unidos, S.A.S	Goods	Male	Legal Person	11 29 2005	Active	Unknown	DISTRITO NACIONAL
928	HOSPITAL PEDIATRICO DR. HUGO DE MENDOZA	Purchases Below the Threshold	ordinary process	21776.26	24414.8608	2638.6008	01 30 2020	01 30 2020	0	In edition	256	Almacenes Unidos, S.A.S	Goods	Male	Legal Person	11 29 2005	Active	Unknown	DISTRITO NACIONAL
675	Consejo Estatal del Azucar	Purchases Below the Threshold	ordinary process	37000	36495.0046	-504.9954	02 4 2020	02 4 2020	0	Active	256	Almacenes Unidos, S.A.S	Goods	Male	Legal Person	11 29 2005	Active	Unknown	DISTRITO NACIONAL
900	Instituto Duartiano	Purchases Below the Threshold	ordinary process	82920	99745.4236	16825.4236	02 12 2020	02 14 2020	2	Closed	256	Almacenes Unidos, S.A.S	Goods	Male	Legal Person	11 29 2005	Active	Unknown	DISTRITO NACIONAL
637	Superintendencia de Electricidad	Purchases Below the Threshold	ordinary process	6000	5995.0018	-4.9982	02 20 2020	02 20 2020	0	Closed	256	Almacenes Unidos, S.A.S	Goods	Male	Legal Person	11 29 2005	Active	Unknown	DISTRITO NACIONAL
675	Consejo Estatal del Azucar	Purchases Below the Threshold	ordinary process	79700	77590.074	-2109.926	03 10 2020	03 11 2020	1	Active	256	Almacenes Unidos, S.A.S	Goods	Male	Legal Person	11 29 2005	Active	Unknown	DISTRITO NACIONAL
889	Consejo Nac Reglamentación y Fomento Industria Lechera	Purchases Below the Threshold	ordinary process	89410.9	103030.4744	13619.5744	03 11 2020	03 11 2020	0	In edition	256	Almacenes Unidos, S.A.S	Goods	Male	Legal Person	11 29 2005	Active	Unknown	DISTRITO NACIONAL
251	Ministerio de Industria, Comercio y Mipymes	Purchases Below the Threshold	ordinary process	137249.5	137249.93	0.43	03 12 2020	03 12 2020	0	Rescinded	256	Almacenes Unidos, S.A.S	Goods	Male	Legal Person	11 29 2005	Active	Unknown	DISTRITO NACIONAL
928	HOSPITAL PEDIATRICO DR. HUGO DE MENDOZA	Purchases Below the Threshold	ordinary process	3175	3320.0008	145.0008	03 18 2020	03 18 2020	0	In edition	256	Almacenes Unidos, S.A.S	Goods	Male	Legal Person	11 29 2005	Active	Unknown	DISTRITO NACIONAL
200	Comedores Económicos	Purchases Below the Threshold	ordinary process	21335	21332.9958	-2.0042	04 22 2020	04 22 2020	0	Active	256	Almacenes Unidos, S.A.S	Goods	Male	Legal Person	11 29 2005	Active	Unknown	DISTRITO NACIONAL
200	Comedores Económicos	Purchases Below the Threshold	ordinary process	36273	36272.9994	-0.0006	05 15 2020	05 15 2020	0	Active	256	Almacenes Unidos, S.A.S	Goods	Male	Legal Person	11 29 2005	Active	Unknown	DISTRITO NACIONAL
200	Comedores Económicos	Purchases Below the Threshold	ordinary process	15000	14757.9768	-242.0232	05 20 2020	05 20 2020	0	Active	256	Almacenes Unidos, S.A.S	Goods	Male	Legal Person	11 29 2005	Active	Unknown	DISTRITO NACIONAL
548	Instituto Dominicano de las Telecomunicaciones	Purchases Below the Threshold	ordinary process	17000	15804.0022	-1195.9978	06 1 2020	06 2 2020	1	Closed	256	Almacenes Unidos, S.A.S	Goods	Male	Legal Person	11 29 2005	Active	Unknown	DISTRITO NACIONAL
928	HOSPITAL PEDIATRICO DR. HUGO DE MENDOZA	Purchases Below the Threshold	ordinary process	3800	4058.99	258.99	06 22 2020	06 23 2020	1	In edition	256	Almacenes Unidos, S.A.S	Goods	Male	Legal Person	11 29 2005	Active	Unknown	DISTRITO NACIONAL
173	Fuerza Aérea Dominicana	Purchases Below the Threshold	ordinary process	54941.5	64830.99	9889.49	06 30 2020	06 30 2020	0	Closed	256	Almacenes Unidos, S.A.S	Goods	Male	Legal Person	11 29 2005	Active	Unknown	DISTRITO NACIONAL
1006	Mercados Dominicanos de Abasto Agropecuario	Purchases Below the Threshold	ordinary process	72700	62689.91	-10010.09	07 21 2020	07 22 2020	1	Closed	256	Almacenes Unidos, S.A.S	Goods	Male	Legal Person	11 29 2005	Active	Unknown	DISTRITO NACIONAL
1006	Mercados Dominicanos de Abasto Agropecuario	Purchases Below the Threshold	ordinary process	56000	45535.92	-10464.08	07 24 2020	07 24 2020	0	Closed	256	Almacenes Unidos, S.A.S	Goods	Male	Legal Person	11 29 2005	Active	Unknown	DISTRITO NACIONAL
670	Instituto Nacional de Auxilios y Viviendas	Purchases Below the Threshold	ordinary process	10000	37554	27554	07 27 2020	07 27 2020	0	Closed	256	Almacenes Unidos, S.A.S	Goods	Male	Legal Person	11 29 2005	Active	Unknown	DISTRITO NACIONAL
670	Instituto Nacional de Auxilios y Viviendas	Purchases Below the Threshold	ordinary process	5000	3349.43	-1650.57	07 28 2020	07 28 2020	0	Closed	256	Almacenes Unidos, S.A.S	Goods	Male	Legal Person	11 29 2005	Active	Unknown	DISTRITO NACIONAL
670	Instituto Nacional de Auxilios y Viviendas	Purchases Below the Threshold	ordinary process	10000	52405.99	42405.99	07 29 2020	07 30 2020	1	Closed	256	Almacenes Unidos, S.A.S	Goods	Male	Legal Person	11 29 2005	Active	Unknown	DISTRITO NACIONAL
986	Hospital General Dr. Vinicio Calventi	Purchases Below the Threshold	ordinary process	32000	30652	-1348	07 30 2020	08 6 2020	7	In edition	256	Almacenes Unidos, S.A.S	Goods	Male	Legal Person	11 29 2005	Active	Unknown	DISTRITO NACIONAL
1006	Mercados Dominicanos de Abasto Agropecuario	Purchases Below the Threshold	ordinary process	63000	52193.93	-10806.07	07 31 2020	07 31 2020	0	Closed	256	Almacenes Unidos, S.A.S	Goods	Male	Legal Person	11 29 2005	Active	Unknown	DISTRITO NACIONAL
986	Hospital General Dr. Vinicio Calventi	Purchases Below the Threshold	ordinary process	25685	33510.84	7825.84	08 3 2020	08 6 2020	3	In edition	256	Almacenes Unidos, S.A.S	Goods	Male	Legal Person	11 29 2005	Active	Unknown	DISTRITO NACIONAL
947	Cuerpo de Bomberos de Santo Domingo Este	Purchases Below the Threshold	ordinary process	1957.62	2309.99	352.37	09 3 2020	09 3 2020	0	Approved flow	256	Almacenes Unidos, S.A.S	Goods	Male	Legal Person	11 29 2005	Active	Unknown	DISTRITO NACIONAL
637	Superintendencia de Electricidad	Purchases Below the Threshold	ordinary process	4000	3749.97	-250.03	09 4 2020	09 4 2020	0	Closed	256	Almacenes Unidos, S.A.S	Goods	Male	Legal Person	11 29 2005	Active	Unknown	DISTRITO NACIONAL
947	Cuerpo de Bomberos de Santo Domingo Este	Minor Purchases	ordinary process	15923.35	18789.55	2866.2	09 7 2020	09 10 2020	3	Approved flow	256	Almacenes Unidos, S.A.S	Goods	Male	Legal Person	11 29 2005	Active	Unknown	DISTRITO NACIONAL
554	Junta de Aviación Civil	Purchases Below the Threshold	ordinary process	20400	18988.91	-1411.09	09 17 2020	09 17 2020	0	Closed	256	Almacenes Unidos, S.A.S	Goods	Male	Legal Person	11 29 2005	Active	Unknown	DISTRITO NACIONAL
670	Instituto Nacional de Auxilios y Viviendas	Purchases Below the Threshold	ordinary process	7600	4730.99	-2869.01	09 22 2020	09 22 2020	0	Closed	256	Almacenes Unidos, S.A.S	Goods	Male	Legal Person	11 29 2005	Active	Unknown	DISTRITO NACIONAL
872	Organismo Dominicano de Acreditación	Purchases Below the Threshold	ordinary process	6726	5799	-927	09 23 2020	09 23 2020	0	Closed	256	Almacenes Unidos, S.A.S	Goods	Male	Legal Person	11 29 2005	Active	Unknown	DISTRITO NACIONAL
623	Centro de Exportación e Inversión de la Republica Dominicana	Purchases Below the Threshold	ordinary process	20250	28076.97	7826.97	10 5 2020	10 5 2020	0	Active	256	Almacenes Unidos, S.A.S	Goods	Male	Legal Person	11 29 2005	Active	Unknown	DISTRITO NACIONAL
623	Centro de Exportación e Inversión de la Republica Dominicana	Purchases Below the Threshold	ordinary process	20250	28076.97	7826.97	10 5 2020	10 5 2020	0	Cancelled	256	Almacenes Unidos, S.A.S	Unknown	Male	Legal Person	11 29 2005	Active	Unknown	DISTRITO NACIONAL
623	Centro de Exportación e Inversión de la Republica Dominicana	Purchases Below the Threshold	ordinary process	20250	28076.97	7826.97	10 5 2020	10 5 2020	0	Cancelled	256	Almacenes Unidos, S.A.S	Unknown	Male	Legal Person	11 29 2005	Active	Unknown	DISTRITO NACIONAL
623	Centro de Exportación e Inversión de la Republica Dominicana	Purchases Below the Threshold	ordinary process	20250	28076.97	7826.97	10 5 2020	10 5 2020	0	Cancelled	256	Almacenes Unidos, S.A.S	Unknown	Male	Legal Person	11 29 2005	Active	Unknown	DISTRITO NACIONAL
554	Junta de Aviación Civil	Purchases Below the Threshold	ordinary process	13820	13278.95	-541.05	10 15 2020	11 2 2020	18	Closed	256	Almacenes Unidos, S.A.S	Goods	Male	Legal Person	11 29 2005	Active	Unknown	DISTRITO NACIONAL
809	Superintendencia de Valores	Purchases Below the Threshold	ordinary process	12159.97	12159.99	0.02	10 16 2020	10 16 2020	0	Closed	256	Almacenes Unidos, S.A.S	Goods	Male	Legal Person	11 29 2005	Active	Unknown	DISTRITO NACIONAL
247	Oficina para el Reordenamiento del Transporte	Purchases Below the Threshold	ordinary process	75500	75499.94	-0.06	10 27 2020	10 27 2020	0	Active	256	Almacenes Unidos, S.A.S	Goods	Male	Legal Person	11 29 2005	Active	Unknown	DISTRITO NACIONAL
637	Superintendencia de Electricidad	Purchases Below the Threshold	ordinary process	5500	4968	-532	11 4 2020	11 5 2020	1	Closed	256	Almacenes Unidos, S.A.S	Goods	Male	Legal Person	11 29 2005	Active	Unknown	DISTRITO NACIONAL
660	Fondo Patrimonial para las Empresas Reformadas	Purchases Below the Threshold	ordinary process	22000	21990.01	-9.99	11 5 2020	11 10 2020	5	Active	256	Almacenes Unidos, S.A.S	Goods	Male	Legal Person	11 29 2005	Active	Unknown	DISTRITO NACIONAL
660	Fondo Patrimonial para las Empresas Reformadas	Purchases Below the Threshold	ordinary process	120110	108091.03	-12018.97	11 10 2020	11 11 2020	1	Active	256	Almacenes Unidos, S.A.S	Goods	Male	Legal Person	11 29 2005	Active	Unknown	DISTRITO NACIONAL
701	DIRECCION NACIONAL DE CONTROL DE DROGAS	Purchases Below the Threshold	ordinary process	146810	140832.7	-5977.3	11 25 2020	11 25 2020	0	In edition	256	Almacenes Unidos, S.A.S	Goods	Male	Legal Person	11 29 2005	Active	Unknown	DISTRITO NACIONAL
652	Banco Agrícola de la República Dominicana	Purchases Below the Threshold	ordinary process	41300	41269.99	-30.01	11 26 2020	12 7 2020	11	Closed	256	Almacenes Unidos, S.A.S	Goods	Male	Legal Person	11 29 2005	Active	Unknown	DISTRITO NACIONAL
251	Ministerio de Industria, Comercio y Mipymes	Purchases Below the Threshold	ordinary process	16350	16325.74	-24.26	11 30 2020	11 30 2020	0	Closed	256	Almacenes Unidos, S.A.S	Goods	Male	Legal Person	11 29 2005	Active	Unknown	DISTRITO NACIONAL
554	Junta de Aviación Civil	Purchases Below the Threshold	ordinary process	2600	2550	-50	12 1 2020	12 1 2020	0	Closed	256	Almacenes Unidos, S.A.S	Goods	Male	Legal Person	11 29 2005	Active	Unknown	DISTRITO NACIONAL
928	HOSPITAL PEDIATRICO DR. HUGO DE MENDOZA	Purchases Below the Threshold	ordinary process	20632	23740	3108	12 4 2020	12 4 2020	0	In edition	256	Almacenes Unidos, S.A.S	Goods	Male	Legal Person	11 29 2005	Active	Unknown	DISTRITO NACIONAL
928	HOSPITAL PEDIATRICO DR. HUGO DE MENDOZA	Purchases Below the Threshold	ordinary process	19244	21259.54	2015.54	12 10 2020	12 10 2020	0	In edition	256	Almacenes Unidos, S.A.S	Goods	Male	Legal Person	11 29 2005	Active	Unknown	DISTRITO NACIONAL
701	DIRECCION NACIONAL DE CONTROL DE DROGAS	Purchases Below the Threshold	ordinary process	147130	143217.92	-3912.08	12 11 2020	12 11 2020	0	In edition	256	Almacenes Unidos, S.A.S	Goods	Male	Legal Person	11 29 2005	Active	Unknown	DISTRITO NACIONAL
670	Instituto Nacional de Auxilios y Viviendas	Purchases Below the Threshold	ordinary process	7250	7130	-120	12 16 2020	12 16 2020	0	Closed	256	Almacenes Unidos, S.A.S	Goods	Male	Legal Person	11 29 2005	Active	Unknown	DISTRITO NACIONAL
201	Dirección General de Desarrollo Fronterizo	Purchases Below the Threshold	ordinary process	4200	5368	1168	12 24 2020	12 29 2020	5	In edition	256	Almacenes Unidos, S.A.S	Goods	Male	Legal Person	11 29 2005	Active	Unknown	DISTRITO NACIONAL
175	Ministerio de Administración Pública	Purchases Below the Threshold	ordinary process	98669.56	83318.5	-15351.06	12 29 2020	01 8 2021	10	Cancelled	256	Almacenes Unidos, S.A.S	Unknown	Male	Legal Person	11 29 2005	Active	Unknown	DISTRITO NACIONAL
175	Ministerio de Administración Pública	Purchases Below the Threshold	ordinary process	98669.56	83318.5	-15351.06	12 29 2020	01 7 2021	9	Rescinded	256	Almacenes Unidos, S.A.S	Goods	Male	Legal Person	11 29 2005	Active	Unknown	DISTRITO NACIONAL
986	Hospital General Dr. Vinicio Calventi	Purchases Below the Threshold	ordinary process	120000	117590	-2410	01 7 2021	01 7 2021	0	In edition	256	Almacenes Unidos, S.A.S	Goods	Male	Legal Person	11 29 2005	Active	Unknown	DISTRITO NACIONAL
809	Superintendencia de Valores	Purchases Below the Threshold	ordinary process	45294	45293.96	-0.04	02 2 2021	02 2 2021	0	Closed	256	Almacenes Unidos, S.A.S	Goods	Male	Legal Person	11 29 2005	Active	Unknown	DISTRITO NACIONAL
554	Junta de Aviación Civil	Purchases Below the Threshold	ordinary process	23100	23800.03	700.03	02 16 2021	02 22 2021	6	Closed	256	Almacenes Unidos, S.A.S	Goods	Male	Legal Person	11 29 2005	Active	Unknown	DISTRITO NACIONAL
554	Junta de Aviación Civil	Purchases Below the Threshold	ordinary process	23100	23800.03	700.03	02 16 2021	02 16 2021	0	Cancelled	256	Almacenes Unidos, S.A.S	Unknown	Male	Legal Person	11 29 2005	Active	Unknown	DISTRITO NACIONAL
545	Tesorería de la Seguridad Social	Purchases Below the Threshold	ordinary process	37399.98	36042.02	-1357.96	02 23 2021	02 24 2021	1	Rescinded	256	Almacenes Unidos, S.A.S	Goods	Male	Legal Person	11 29 2005	Active	Unknown	DISTRITO NACIONAL
964	Defensor del Pueblo	Purchases Below the Threshold	ordinary process	24000	21174.03	-2825.97	02 25 2021	02 26 2021	1	Closed	256	Almacenes Unidos, S.A.S	Goods	Male	Legal Person	11 29 2005	Active	Unknown	DISTRITO NACIONAL
196	Dirección General de Catastro Nacional	Purchases Below the Threshold	ordinary process	12869.87	12868.95	-0.92	03 9 2021	03 9 2021	0	Rescinded	256	Almacenes Unidos, S.A.S	Goods	Male	Legal Person	11 29 2005	Active	Unknown	DISTRITO NACIONAL
652	Banco Agrícola de la República Dominicana	Purchases Below the Threshold	ordinary process	98500	98356.36	-143.64	03 11 2021	03 23 2021	12	Closed	256	Almacenes Unidos, S.A.S	Goods	Male	Legal Person	11 29 2005	Active	Unknown	DISTRITO NACIONAL
719	Centro Educacion Medica de Amistad Dominico-Japonesa	Purchases Below the Threshold	ordinary process	27717.16	24654.05	-3063.11	03 19 2021	03 19 2021	0	Closed	256	Almacenes Unidos, S.A.S	Services	Male	Legal Person	11 29 2005	Active	Unknown	DISTRITO NACIONAL
637	Superintendencia de Electricidad	Purchases Below the Threshold	ordinary process	38500	36364.98	-2135.02	03 24 2021	03 24 2021	0	Closed	256	Almacenes Unidos, S.A.S	Goods	Male	Legal Person	11 29 2005	Active	Unknown	DISTRITO NACIONAL
637	Superintendencia de Electricidad	Purchases Below the Threshold	ordinary process	32000	31328.03	-671.97	04 14 2021	04 14 2021	0	Closed	256	Almacenes Unidos, S.A.S	Goods	Male	Legal Person	11 29 2005	Active	Unknown	DISTRITO NACIONAL
139	Contraloría Gral de la República	Purchases Below the Threshold	ordinary process	40422.89	47699.01	7276.12	05 4 2021	05 4 2021	0	Closed	256	Almacenes Unidos, S.A.S	Goods	Male	Legal Person	11 29 2005	Active	Unknown	DISTRITO NACIONAL
928	HOSPITAL PEDIATRICO DR. HUGO DE MENDOZA	Purchases Below the Threshold	ordinary process	38200	44804.01	6604.01	06 2 2021	06 2 2021	0	In edition	256	Almacenes Unidos, S.A.S	Goods	Male	Legal Person	11 29 2005	Active	Unknown	DISTRITO NACIONAL
554	Junta de Aviación Civil	Purchases Below the Threshold	ordinary process	20879.52	20219.01	-660.51	06 16 2021	06 16 2021	0	Closed	256	Almacenes Unidos, S.A.S	Goods	Male	Legal Person	11 29 2005	Active	Unknown	DISTRITO NACIONAL
837	Parque Zoológico Nacional	Minor Purchases	ordinary process	905290	23904.99	-881385.01	06 18 2021	06 29 2021	11	Closed	256	Almacenes Unidos, S.A.S	Goods	Male	Legal Person	11 29 2005	Active	Unknown	DISTRITO NACIONAL
846	DIRECCION GENERAL DE COMUNICACION	Purchases Below the Threshold	ordinary process	97790	32946	-64844	06 23 2021	06 26 2021	3	Closed	256	Almacenes Unidos, S.A.S	Goods	Male	Legal Person	11 29 2005	Active	Unknown	DISTRITO NACIONAL
652	Banco Agrícola de la República Dominicana	Purchases Below the Threshold	ordinary process	160500	153886.79	-6613.21	05 18 2022	06 6 2022	19	Closed	256	Almacenes Unidos, S.A.S	Goods	Male	Legal Person	11 29 2005	Active	Unknown	DISTRITO NACIONAL
3	Ministerio de la Juventud	Purchases Below the Threshold	ordinary process	61826.26	72954.99	11128.73	06 2 2022	06 2 2022	0	Rescinded	256	Almacenes Unidos, S.A.S	Goods	Male	Legal Person	11 29 2005	Active	Unknown	DISTRITO NACIONAL
637	Superintendencia de Electricidad	Purchases Below the Threshold	ordinary process	61875	61499.95	-375.05	06 30 2022	06 30 2022	0	Closed	256	Almacenes Unidos, S.A.S	Goods	Male	Legal Person	11 29 2005	Active	Unknown	DISTRITO NACIONAL
652	Banco Agrícola de la República Dominicana	Purchases Below the Threshold	ordinary process	66500	66280.36	-219.64	07 18 2022	07 27 2022	9	Closed	256	Almacenes Unidos, S.A.S	Goods	Male	Legal Person	11 29 2005	Active	Unknown	DISTRITO NACIONAL
652	Banco Agrícola de la República Dominicana	Purchases Below the Threshold	ordinary process	26460.22	26460.02	-0.2	07 22 2022	08 15 2022	24	Approved flow	256	Almacenes Unidos, S.A.S	Goods	Male	Legal Person	11 29 2005	Active	Unknown	DISTRITO NACIONAL
862	HOSPITAL TRAUMATOLOGICO DR. NEY ARIAS LORA	Purchases Below the Threshold	ordinary process	13485	13485	0	07 29 2022	07 29 2022	0	Closed	256	Almacenes Unidos, S.A.S	Goods	Male	Legal Person	11 29 2005	Active	Unknown	DISTRITO NACIONAL
809	Superintendencia de Valores	Purchases Below the Threshold	ordinary process	28519	28517	-2	09 6 2022	09 6 2022	0	Closed	256	Almacenes Unidos, S.A.S	Goods	Male	Legal Person	11 29 2005	Active	Unknown	DISTRITO NACIONAL
828	Liga Municipal Dominicana	Purchases Below the Threshold	ordinary process	119300	105098.99	-14201.01	09 8 2022	09 9 2022	1	Closed	256	Almacenes Unidos, S.A.S	Goods	Male	Legal Person	11 29 2005	Active	Unknown	DISTRITO NACIONAL
1088	Junta de Retiro y Fondo de Pensiones de las Fuerzas Armadas	Purchases Below the Threshold	ordinary process	44404.48	52397.3	7992.82	09 21 2022	09 21 2022	0	Closed	256	Almacenes Unidos, S.A.S	Goods	Male	Legal Person	11 29 2005	Active	Unknown	DISTRITO NACIONAL
1092	Hospital Provincial Dr. Rafael J. Mañón	Purchases Below the Threshold	ordinary process	33305	39299.9	5994.9	03 10 2023	03 10 2023	0	Active	256	Almacenes Unidos, S.A.S	Goods	Male	Legal Person	11 29 2005	Active	Unknown	DISTRITO NACIONAL
676	Departamento Aeroportuario	Purchases Below the Threshold	ordinary process	15000	14735	-265	06 16 2023	06 16 2023	0	In edition	256	Almacenes Unidos, S.A.S	Goods	Male	Legal Person	11 29 2005	Active	Unknown	DISTRITO NACIONAL
223	Dirección General de Aduanas y Puertos	Purchases Below the Threshold	ordinary process	10000	8139.64	-1860.36	01 2 2018	01 2 2018	0	Closed	20891	Almoda Almacén de la Moda, SRL	Goods	Male	Legal Person	11 21 2012	Active	Small company	DISTRITO NACIONAL
223	Dirección General de Aduanas y Puertos	Purchases Below the Threshold	ordinary process	27529	32484.22	4955.22	01 2 2018	01 3 2018	1	Closed	20891	Almoda Almacén de la Moda, SRL	Goods	Male	Legal Person	11 21 2012	Active	Small company	DISTRITO NACIONAL
223	Dirección General de Aduanas y Puertos	Purchases Below the Threshold	ordinary process	58444	68963.92	10519.92	01 9 2018	01 9 2018	0	Closed	20891	Almoda Almacén de la Moda, SRL	Goods	Male	Legal Person	11 21 2012	Active	Small company	DISTRITO NACIONAL
223	Dirección General de Aduanas y Puertos	Purchases Below the Threshold	ordinary process	16760	19776.8	3016.8	01 15 2018	01 15 2018	0	Closed	20891	Almoda Almacén de la Moda, SRL	Goods	Male	Legal Person	11 21 2012	Active	Small company	DISTRITO NACIONAL
223	Dirección General de Aduanas y Puertos	Purchases Below the Threshold	ordinary process	83850	98943	15093	01 17 2018	01 19 2018	2	Cancelled	20891	Almoda Almacén de la Moda, SRL	Goods	Male	Legal Person	11 21 2012	Active	Small company	DISTRITO NACIONAL
223	Dirección General de Aduanas y Puertos	Purchases Below the Threshold	ordinary process	83850	98166.56	14316.56	01 17 2018	02 22 2018	36	Closed	20891	Almoda Almacén de la Moda, SRL	Goods	Male	Legal Person	11 21 2012	Active	Small company	DISTRITO NACIONAL
223	Dirección General de Aduanas y Puertos	Purchases Below the Threshold	ordinary process	8335	9835.3	1500.3	01 19 2018	01 23 2018	4	Closed	20891	Almoda Almacén de la Moda, SRL	Goods	Male	Legal Person	11 21 2012	Active	Small company	DISTRITO NACIONAL
909	Comisión Nacional de Energía	Purchases Below the Threshold	ordinary process	33100	11915.5	-21184.5	01 19 2018	01 24 2018	5	Closed	20891	Almoda Almacén de la Moda, SRL	Goods	Male	Legal Person	11 21 2012	Active	Small company	DISTRITO NACIONAL
223	Dirección General de Aduanas y Puertos	Purchases Below the Threshold	ordinary process	88000	59188.8	-28811.2	01 26 2018	01 31 2018	5	Closed	20891	Almoda Almacén de la Moda, SRL	Goods	Male	Legal Person	11 21 2012	Active	Small company	DISTRITO NACIONAL
223	Dirección General de Aduanas y Puertos	Purchases Below the Threshold	ordinary process	18230.4	21511.872	3281.472	01 31 2018	01 31 2018	0	Closed	20891	Almoda Almacén de la Moda, SRL	Goods	Male	Legal Person	11 21 2012	Active	Small company	DISTRITO NACIONAL
909	Comisión Nacional de Energía	Purchases Below the Threshold	ordinary process	60321.6	47940	-12381.6	02 19 2018	02 19 2018	0	Closed	20891	Almoda Almacén de la Moda, SRL	Goods	Male	Legal Person	11 21 2012	Active	Small company	DISTRITO NACIONAL
223	Dirección General de Aduanas y Puertos	Purchases Below the Threshold	ordinary process	47250	55755	8505	02 19 2018	02 19 2018	0	Closed	20891	Almoda Almacén de la Moda, SRL	Goods	Male	Legal Person	11 21 2012	Active	Small company	DISTRITO NACIONAL
223	Dirección General de Aduanas y Puertos	Purchases Below the Threshold	ordinary process	5060	5970.8	910.8	03 1 2018	03 1 2018	0	Closed	20891	Almoda Almacén de la Moda, SRL	Goods	Male	Legal Person	11 21 2012	Active	Small company	DISTRITO NACIONAL
223	Dirección General de Aduanas y Puertos	Purchases Below the Threshold	ordinary process	11700	13806	2106	03 1 2018	03 1 2018	0	Closed	20891	Almoda Almacén de la Moda, SRL	Goods	Male	Legal Person	11 21 2012	Active	Small company	DISTRITO NACIONAL
223	Dirección General de Aduanas y Puertos	Purchases Below the Threshold	ordinary process	19300	22774	3474	03 2 2018	03 12 2018	10	Closed	20891	Almoda Almacén de la Moda, SRL	Goods	Male	Legal Person	11 21 2012	Active	Small company	DISTRITO NACIONAL
223	Dirección General de Aduanas y Puertos	Purchases Below the Threshold	ordinary process	45600	43872.4	-1727.6	03 2 2018	03 13 2018	11	Closed	20891	Almoda Almacén de la Moda, SRL	Goods	Male	Legal Person	11 21 2012	Active	Small company	DISTRITO NACIONAL
223	Dirección General de Aduanas y Puertos	Purchases Below the Threshold	ordinary process	41886	49425.48	7539.48	03 12 2018	03 12 2018	0	Rescinded	20891	Almoda Almacén de la Moda, SRL	Goods	Male	Legal Person	11 21 2012	Active	Small company	DISTRITO NACIONAL
223	Dirección General de Aduanas y Puertos	Purchases Below the Threshold	ordinary process	32100	37878	5778	03 15 2018	03 20 2018	5	Closed	20891	Almoda Almacén de la Moda, SRL	Goods	Male	Legal Person	11 21 2012	Active	Small company	DISTRITO NACIONAL
223	Dirección General de Aduanas y Puertos	Purchases Below the Threshold	ordinary process	22680	21098.4	-1581.6	03 23 2018	03 23 2018	0	Closed	20891	Almoda Almacén de la Moda, SRL	Goods	Male	Legal Person	11 21 2012	Active	Small company	DISTRITO NACIONAL
223	Dirección General de Aduanas y Puertos	Purchases Below the Threshold	ordinary process	9550	11269	1719	03 26 2018	03 26 2018	0	Closed	20891	Almoda Almacén de la Moda, SRL	Goods	Male	Legal Person	11 21 2012	Active	Small company	DISTRITO NACIONAL
223	Dirección General de Aduanas y Puertos	Purchases Below the Threshold	ordinary process	67420	79555.6	12135.6	04 9 2018	04 10 2018	1	Closed	20891	Almoda Almacén de la Moda, SRL	Services	Male	Legal Person	11 21 2012	Active	Small company	DISTRITO NACIONAL
223	Dirección General de Aduanas y Puertos	Purchases Below the Threshold	ordinary process	2775	3274.5	499.5	04 11 2018	04 11 2018	0	Closed	20891	Almoda Almacén de la Moda, SRL	Goods	Male	Legal Person	11 21 2012	Active	Small company	DISTRITO NACIONAL
909	Comisión Nacional de Energía	Minor Purchases	ordinary process	166540	96358.8	-70181.2	04 16 2018	04 24 2018	8	Closed	20891	Almoda Almacén de la Moda, SRL	Goods	Male	Legal Person	11 21 2012	Active	Small company	DISTRITO NACIONAL
909	Comisión Nacional de Energía	Minor Purchases	ordinary process	166540	96358.8	-70181.2	04 16 2018	04 20 2018	4	Cancelled	20891	Almoda Almacén de la Moda, SRL	Goods	Male	Legal Person	11 21 2012	Active	Small company	DISTRITO NACIONAL
223	Dirección General de Aduanas y Puertos	Purchases Below the Threshold	ordinary process	83200	98176	14976	04 19 2018	04 19 2018	0	Closed	20891	Almoda Almacén de la Moda, SRL	Goods	Male	Legal Person	11 21 2012	Active	Small company	DISTRITO NACIONAL
223	Dirección General de Aduanas y Puertos	Purchases Below the Threshold	ordinary process	12600	14868	2268	04 24 2018	04 24 2018	0	Closed	20891	Almoda Almacén de la Moda, SRL	Goods	Male	Legal Person	11 21 2012	Active	Small company	DISTRITO NACIONAL
223	Dirección General de Aduanas y Puertos	Purchases Below the Threshold	ordinary process	19880	23458.4	3578.4	04 26 2018	04 26 2018	0	Closed	20891	Almoda Almacén de la Moda, SRL	Goods	Male	Legal Person	11 21 2012	Active	Small company	DISTRITO NACIONAL
223	Dirección General de Aduanas y Puertos	Minor Purchases	ordinary process	102750	76464	-26286	04 27 2018	06 19 2018	53	Cancelled	20891	Almoda Almacén de la Moda, SRL	Unknown	Male	Legal Person	11 21 2012	Active	Small company	DISTRITO NACIONAL
223	Dirección General de Aduanas y Puertos	Minor Purchases	ordinary process	102750	88146	-14604	04 27 2018	06 19 2018	53	Closed	20891	Almoda Almacén de la Moda, SRL	Goods	Male	Legal Person	11 21 2012	Active	Small company	DISTRITO NACIONAL
223	Dirección General de Aduanas y Puertos	Purchases Below the Threshold	ordinary process	98930	116737.4	17807.4	05 3 2018	05 3 2018	0	Closed	20891	Almoda Almacén de la Moda, SRL	Goods	Male	Legal Person	11 21 2012	Active	Small company	DISTRITO NACIONAL
223	Dirección General de Aduanas y Puertos	Purchases Below the Threshold	ordinary process	12138	14322.84	2184.84	05 8 2018	05 8 2018	0	Closed	20891	Almoda Almacén de la Moda, SRL	Goods	Male	Legal Person	11 21 2012	Active	Small company	DISTRITO NACIONAL
223	Dirección General de Aduanas y Puertos	Purchases Below the Threshold	ordinary process	50400	58976.4	8576.4	05 10 2018	05 11 2018	1	Closed	20891	Almoda Almacén de la Moda, SRL	Goods	Male	Legal Person	11 21 2012	Active	Small company	DISTRITO NACIONAL
223	Dirección General de Aduanas y Puertos	Purchases Below the Threshold	ordinary process	26460	18849.32	-7610.68	05 21 2018	05 22 2018	1	Closed	20891	Almoda Almacén de la Moda, SRL	Goods	Male	Legal Person	11 21 2012	Active	Small company	DISTRITO NACIONAL
223	Dirección General de Aduanas y Puertos	Purchases Below the Threshold	ordinary process	17880	21098.4	3218.4	05 22 2018	05 22 2018	0	Closed	20891	Almoda Almacén de la Moda, SRL	Goods	Male	Legal Person	11 21 2012	Active	Small company	DISTRITO NACIONAL
223	Dirección General de Aduanas y Puertos	Purchases Below the Threshold	ordinary process	18060	21310.8	3250.8	06 4 2018	06 4 2018	0	Closed	20891	Almoda Almacén de la Moda, SRL	Goods	Male	Legal Person	11 21 2012	Active	Small company	DISTRITO NACIONAL
223	Dirección General de Aduanas y Puertos	Purchases Below the Threshold	ordinary process	2754	3249.72	495.72	06 5 2018	06 5 2018	0	Closed	20891	Almoda Almacén de la Moda, SRL	Goods	Male	Legal Person	11 21 2012	Active	Small company	DISTRITO NACIONAL
223	Dirección General de Aduanas y Puertos	Purchases Below the Threshold	ordinary process	48150	56817	8667	06 14 2018	06 14 2018	0	Closed	20891	Almoda Almacén de la Moda, SRL	Goods	Male	Legal Person	11 21 2012	Active	Small company	DISTRITO NACIONAL
223	Dirección General de Aduanas y Puertos	Purchases Below the Threshold	ordinary process	19192	43803.96	24611.96	06 19 2018	06 19 2018	0	Closed	20891	Almoda Almacén de la Moda, SRL	Goods	Male	Legal Person	11 21 2012	Active	Small company	DISTRITO NACIONAL
223	Dirección General de Aduanas y Puertos	Price Comparison	ordinary process	1945200	1495529.64	-449670.36	06 18 2018	07 23 2018	35	Closed	20891	Almoda Almacén de la Moda, SRL	Goods	Male	Legal Person	11 21 2012	Active	Small company	DISTRITO NACIONAL
223	Dirección General de Aduanas y Puertos	Purchases Below the Threshold	ordinary process	3840	4531.2	691.2	06 26 2018	06 26 2018	0	Closed	20891	Almoda Almacén de la Moda, SRL	Goods	Male	Legal Person	11 21 2012	Active	Small company	DISTRITO NACIONAL
223	Dirección General de Aduanas y Puertos	Purchases Below the Threshold	ordinary process	8975	10590.5	1615.5	06 27 2018	06 27 2018	0	Closed	20891	Almoda Almacén de la Moda, SRL	Goods	Male	Legal Person	11 21 2012	Active	Small company	DISTRITO NACIONAL
909	Comisión Nacional de Energía	Minor Purchases	ordinary process	250000	26219.6	-223780.4	06 26 2018	07 4 2018	8	Closed	20891	Almoda Almacén de la Moda, SRL	Goods	Male	Legal Person	11 21 2012	Active	Small company	DISTRITO NACIONAL
223	Dirección General de Aduanas y Puertos	Purchases Below the Threshold	ordinary process	17950	21181	3231	07 4 2018	07 4 2018	0	Closed	20891	Almoda Almacén de la Moda, SRL	Goods	Male	Legal Person	11 21 2012	Active	Small company	DISTRITO NACIONAL
223	Dirección General de Aduanas y Puertos	Purchases Below the Threshold	ordinary process	22350	26373	4023	07 17 2018	07 17 2018	0	Closed	20891	Almoda Almacén de la Moda, SRL	Goods	Male	Legal Person	11 21 2012	Active	Small company	DISTRITO NACIONAL
223	Dirección General de Aduanas y Puertos	Purchases Below the Threshold	ordinary process	6890	8130.2	1240.2	07 17 2018	07 17 2018	0	Closed	20891	Almoda Almacén de la Moda, SRL	Goods	Male	Legal Person	11 21 2012	Active	Small company	DISTRITO NACIONAL
223	Dirección General de Aduanas y Puertos	Purchases Below the Threshold	ordinary process	20880	24638.4	3758.4	07 18 2018	07 18 2018	0	Closed	20891	Almoda Almacén de la Moda, SRL	Goods	Male	Legal Person	11 21 2012	Active	Small company	DISTRITO NACIONAL
223	Dirección General de Aduanas y Puertos	Purchases Below the Threshold	ordinary process	18180	21452.4	3272.4	07 18 2018	07 18 2018	0	Closed	20891	Almoda Almacén de la Moda, SRL	Goods	Male	Legal Person	11 21 2012	Active	Small company	DISTRITO NACIONAL
223	Dirección General de Aduanas y Puertos	Purchases Below the Threshold	ordinary process	15840	18691.2	2851.2	07 19 2018	07 19 2018	0	Closed	20891	Almoda Almacén de la Moda, SRL	Goods	Male	Legal Person	11 21 2012	Active	Small company	DISTRITO NACIONAL
223	Dirección General de Aduanas y Puertos	Purchases Below the Threshold	ordinary process	100800	118944	18144	07 23 2018	07 23 2018	0	Closed	20891	Almoda Almacén de la Moda, SRL	Goods	Male	Legal Person	11 21 2012	Active	Small company	DISTRITO NACIONAL
223	Dirección General de Aduanas y Puertos	Purchases Below the Threshold	ordinary process	101200	119416	18216	07 26 2018	07 26 2018	0	Closed	20891	Almoda Almacén de la Moda, SRL	Goods	Male	Legal Person	11 21 2012	Active	Small company	DISTRITO NACIONAL
223	Dirección General de Aduanas y Puertos	Purchases Below the Threshold	ordinary process	17880	21098.4	3218.4	07 31 2018	07 31 2018	0	Closed	20891	Almoda Almacén de la Moda, SRL	Goods	Male	Legal Person	11 21 2012	Active	Small company	DISTRITO NACIONAL
223	Dirección General de Aduanas y Puertos	Minor Purchases	ordinary process	156000	270810	114810	08 3 2018	08 20 2018	17	Closed	20891	Almoda Almacén de la Moda, SRL	Goods	Male	Legal Person	11 21 2012	Active	Small company	DISTRITO NACIONAL
223	Dirección General de Aduanas y Puertos	Purchases Below the Threshold	ordinary process	10004	11804.72	1800.72	08 15 2018	08 15 2018	0	Closed	20891	Almoda Almacén de la Moda, SRL	Goods	Male	Legal Person	11 21 2012	Active	Small company	DISTRITO NACIONAL
843	Consejo Nacional para la Niñez y la Adolescencia	Price Comparison	ordinary process	1395000	630828	-764172	08 13 2018	08 28 2018	15	Active	20891	Almoda Almacén de la Moda, SRL	Goods	Male	Legal Person	11 21 2012	Active	Small company	DISTRITO NACIONAL
223	Dirección General de Aduanas y Puertos	Purchases Below the Threshold	ordinary process	68745	81119.1	12374.1	08 22 2018	08 22 2018	0	Closed	20891	Almoda Almacén de la Moda, SRL	Goods	Male	Legal Person	11 21 2012	Active	Small company	DISTRITO NACIONAL
223	Dirección General de Aduanas y Puertos	Purchases Below the Threshold	ordinary process	9750	11505	1755	08 24 2018	08 24 2018	0	Closed	20891	Almoda Almacén de la Moda, SRL	Goods	Male	Legal Person	11 21 2012	Active	Small company	DISTRITO NACIONAL
223	Dirección General de Aduanas y Puertos	Purchases Below the Threshold	ordinary process	20220	23859.6	3639.6	08 29 2018	08 29 2018	0	Closed	20891	Almoda Almacén de la Moda, SRL	Goods	Male	Legal Person	11 21 2012	Active	Small company	DISTRITO NACIONAL
223	Dirección General de Aduanas y Puertos	Purchases Below the Threshold	ordinary process	2760	3256.8	496.8	08 30 2018	08 30 2018	0	Closed	20891	Almoda Almacén de la Moda, SRL	Goods	Male	Legal Person	11 21 2012	Active	Small company	DISTRITO NACIONAL
223	Dirección General de Aduanas y Puertos	Purchases Below the Threshold	ordinary process	53640	63295.2	9655.2	09 3 2018	09 3 2018	0	Closed	20891	Almoda Almacén de la Moda, SRL	Goods	Male	Legal Person	11 21 2012	Active	Small company	DISTRITO NACIONAL
843	Consejo Nacional para la Niñez y la Adolescencia	Price Comparison	ordinary process	3756150	2455444.3	-1300705.7	08 27 2018	09 11 2018	15	Active	20891	Almoda Almacén de la Moda, SRL	Goods	Male	Legal Person	11 21 2012	Active	Small company	DISTRITO NACIONAL
223	Dirección General de Aduanas y Puertos	Purchases Below the Threshold	ordinary process	99160	117008.8	17848.8	09 7 2018	09 7 2018	0	Closed	20891	Almoda Almacén de la Moda, SRL	Goods	Male	Legal Person	11 21 2012	Active	Small company	DISTRITO NACIONAL
223	Dirección General de Aduanas y Puertos	Purchases Below the Threshold	ordinary process	120024	113506.56	-6517.44	09 12 2018	09 13 2018	1	Closed	20891	Almoda Almacén de la Moda, SRL	Goods	Male	Legal Person	11 21 2012	Active	Small company	DISTRITO NACIONAL
174	Ministerio de la Mujer	Minor Purchases	ordinary process	859998.96	855424.6452	-4574.3148	09 19 2018	09 26 2018	7	Closed	20891	Almoda Almacén de la Moda, SRL	Goods	Male	Legal Person	11 21 2012	Active	Small company	DISTRITO NACIONAL
223	Dirección General de Aduanas y Puertos	Purchases Below the Threshold	ordinary process	10450	12331	1881	09 26 2018	09 26 2018	0	Closed	20891	Almoda Almacén de la Moda, SRL	Goods	Male	Legal Person	11 21 2012	Active	Small company	DISTRITO NACIONAL
223	Dirección General de Aduanas y Puertos	Purchases Below the Threshold	ordinary process	56500	103529.837	47029.837	10 9 2018	11 6 2018	28	Active	20891	Almoda Almacén de la Moda, SRL	Goods	Male	Legal Person	11 21 2012	Active	Small company	DISTRITO NACIONAL
223	Dirección General de Aduanas y Puertos	Minor Purchases	ordinary process	265000	608290	343290	10 5 2018	01 4 2019	91	Closed	20891	Almoda Almacén de la Moda, SRL	Goods	Male	Legal Person	11 21 2012	Active	Small company	DISTRITO NACIONAL
223	Dirección General de Aduanas y Puertos	Minor Purchases	ordinary process	265000	556134	291134	10 5 2018	01 4 2019	91	Cancelled	20891	Almoda Almacén de la Moda, SRL	Goods	Male	Legal Person	11 21 2012	Active	Small company	DISTRITO NACIONAL
223	Dirección General de Aduanas y Puertos	Minor Purchases	ordinary process	699999.6	770834.528	70834.928	10 5 2018	10 22 2018	17	Cancelled	20891	Almoda Almacén de la Moda, SRL	Goods	Male	Legal Person	11 21 2012	Active	Small company	DISTRITO NACIONAL
223	Dirección General de Aduanas y Puertos	Minor Purchases	ordinary process	699999.6	652752.4	-47247.2	10 5 2018	10 16 2018	11	Cancelled	20891	Almoda Almacén de la Moda, SRL	Goods	Male	Legal Person	11 21 2012	Active	Small company	DISTRITO NACIONAL
223	Dirección General de Aduanas y Puertos	Minor Purchases	ordinary process	699999.6	800252.4	100252.8	10 5 2018	10 25 2018	20	Active	20891	Almoda Almacén de la Moda, SRL	Goods	Male	Legal Person	11 21 2012	Active	Small company	DISTRITO NACIONAL
843	Consejo Nacional para la Niñez y la Adolescencia	Price Comparison	ordinary process	3824222.6	3775622.4	-48600.2	10 2 2018	10 17 2018	15	Active	20891	Almoda Almacén de la Moda, SRL	Goods	Male	Legal Person	11 21 2012	Active	Small company	DISTRITO NACIONAL
843	Consejo Nacional para la Niñez y la Adolescencia	National Public Tender	ordinary process	11072730	5922442.42	-5150287.58	08 29 2018	11 1 2018	64	Active	20891	Almoda Almacén de la Moda, SRL	Goods	Male	Legal Person	11 21 2012	Active	Small company	DISTRITO NACIONAL
223	Dirección General de Aduanas y Puertos	Purchases Below the Threshold	ordinary process	36000	35069.6	-930.4	10 15 2018	10 15 2018	0	Closed	20891	Almoda Almacén de la Moda, SRL	Goods	Male	Legal Person	11 21 2012	Active	Small company	DISTRITO NACIONAL
174	Ministerio de la Mujer	Minor Purchases	ordinary process	900000	575250	-324750	10 25 2018	10 31 2018	6	Closed	20891	Almoda Almacén de la Moda, SRL	Goods	Male	Legal Person	11 21 2012	Active	Small company	DISTRITO NACIONAL
223	Dirección General de Aduanas y Puertos	Purchases Below the Threshold	ordinary process	13635	16089.3	2454.3	11 1 2018	11 1 2018	0	Active	20891	Almoda Almacén de la Moda, SRL	Goods	Male	Legal Person	11 21 2012	Active	Small company	DISTRITO NACIONAL
223	Dirección General de Aduanas y Puertos	Purchases Below the Threshold	ordinary process	49000	35341	-13659	11 6 2018	11 8 2018	2	Active	20891	Almoda Almacén de la Moda, SRL	Goods	Male	Legal Person	11 21 2012	Active	Small company	DISTRITO NACIONAL
223	Dirección General de Aduanas y Puertos	Purchases Below the Threshold	ordinary process	5000	28272.8	23272.8	11 7 2018	11 8 2018	1	Active	20891	Almoda Almacén de la Moda, SRL	Goods	Male	Legal Person	11 21 2012	Active	Small company	DISTRITO NACIONAL
223	Dirección General de Aduanas y Puertos	Purchases Below the Threshold	ordinary process	111854	131987.72	20133.72	11 23 2018	11 23 2018	0	Active	20891	Almoda Almacén de la Moda, SRL	Goods	Male	Legal Person	11 21 2012	Active	Small company	DISTRITO NACIONAL
223	Dirección General de Aduanas y Puertos	Purchases Below the Threshold	ordinary process	24250	28615	4365	11 23 2018	11 23 2018	0	Modified	20891	Almoda Almacén de la Moda, SRL	Goods	Male	Legal Person	11 21 2012	Active	Small company	DISTRITO NACIONAL
223	Dirección General de Aduanas y Puertos	Minor Purchases	ordinary process	584000	533360	-50640	12 11 2018	12 17 2018	6	Active	20891	Almoda Almacén de la Moda, SRL	Goods	Male	Legal Person	11 21 2012	Active	Small company	DISTRITO NACIONAL
223	Dirección General de Aduanas y Puertos	Purchases Below the Threshold	ordinary process	38450	45371	6921	12 20 2018	01 2 2019	13	Closed	20891	Almoda Almacén de la Moda, SRL	Goods	Male	Legal Person	11 21 2012	Active	Small company	DISTRITO NACIONAL
843	Consejo Nacional para la Niñez y la Adolescencia	Price Comparison	ordinary process	3805100	1047970	-2757130	02 14 2019	03 4 2019	18	Closed	20891	Almoda Almacén de la Moda, SRL	Goods	Male	Legal Person	11 21 2012	Active	Small company	DISTRITO NACIONAL
223	Dirección General de Aduanas y Puertos	Purchases Below the Threshold	ordinary process	64102.76	76580.82	12478.06	02 25 2019	03 5 2019	8	Closed	20891	Almoda Almacén de la Moda, SRL	Goods	Male	Legal Person	11 21 2012	Active	Small company	DISTRITO NACIONAL
223	Dirección General de Aduanas y Puertos	Minor Purchases	ordinary process	319602	102103.04	-217498.96	03 1 2019	03 28 2019	27	Closed	20891	Almoda Almacén de la Moda, SRL	Goods	Male	Legal Person	11 21 2012	Active	Small company	DISTRITO NACIONAL
223	Dirección General de Aduanas y Puertos	Purchases Below the Threshold	ordinary process	1990	2348.2	358.2	03 7 2019	03 7 2019	0	Closed	20891	Almoda Almacén de la Moda, SRL	Goods	Male	Legal Person	11 21 2012	Active	Small company	DISTRITO NACIONAL
223	Dirección General de Aduanas y Puertos	Purchases Below the Threshold	ordinary process	32238	38040.84	5802.84	03 20 2019	03 20 2019	0	Closed	20891	Almoda Almacén de la Moda, SRL	Goods	Male	Legal Person	11 21 2012	Active	Small company	DISTRITO NACIONAL
223	Dirección General de Aduanas y Puertos	Minor Purchases	ordinary process	910000	1029904	119904	03 21 2019	03 27 2019	6	Closed	20891	Almoda Almacén de la Moda, SRL	Goods	Male	Legal Person	11 21 2012	Active	Small company	DISTRITO NACIONAL
223	Dirección General de Aduanas y Puertos	Purchases Below the Threshold	ordinary process	3900	4602	702	04 2 2019	04 2 2019	0	Closed	20891	Almoda Almacén de la Moda, SRL	Goods	Male	Legal Person	11 21 2012	Active	Small company	DISTRITO NACIONAL
843	Consejo Nacional para la Niñez y la Adolescencia	Price Comparison	ordinary process	3900450	2526540	-1373910	03 28 2019	04 24 2019	27	Active	20891	Almoda Almacén de la Moda, SRL	Goods	Male	Legal Person	11 21 2012	Active	Small company	DISTRITO NACIONAL
174	Ministerio de la Mujer	Minor Purchases	ordinary process	649000	649000	0	04 2 2019	04 4 2019	2	Closed	20891	Almoda Almacén de la Moda, SRL	Goods	Male	Legal Person	11 21 2012	Active	Small company	DISTRITO NACIONAL
223	Dirección General de Aduanas y Puertos	Purchases Below the Threshold	ordinary process	77840	91851.2	14011.2	04 18 2019	04 22 2019	4	Closed	20891	Almoda Almacén de la Moda, SRL	Goods	Male	Legal Person	11 21 2012	Active	Small company	DISTRITO NACIONAL
843	Consejo Nacional para la Niñez y la Adolescencia	Purchases Below the Threshold	ordinary process	118573.3	118572.3	-1	04 24 2019	04 25 2019	1	Closed	20891	Almoda Almacén de la Moda, SRL	Goods	Male	Legal Person	11 21 2012	Active	Small company	DISTRITO NACIONAL
843	Consejo Nacional para la Niñez y la Adolescencia	Purchases Below the Threshold	ordinary process	115517.1	115516.1	-1	04 24 2019	04 24 2019	0	Closed	20891	Almoda Almacén de la Moda, SRL	Goods	Male	Legal Person	11 21 2012	Active	Small company	DISTRITO NACIONAL
223	Dirección General de Aduanas y Puertos	Purchases Below the Threshold	ordinary process	9950	11741	1791	05 8 2019	05 8 2019	0	Closed	20891	Almoda Almacén de la Moda, SRL	Goods	Male	Legal Person	11 21 2012	Active	Small company	DISTRITO NACIONAL
223	Dirección General de Aduanas y Puertos	Purchases Below the Threshold	ordinary process	85144	100469.92	15325.92	05 15 2019	05 15 2019	0	Closed	20891	Almoda Almacén de la Moda, SRL	Goods	Male	Legal Person	11 21 2012	Active	Small company	DISTRITO NACIONAL
223	Dirección General de Aduanas y Puertos	Minor Purchases	ordinary process	247000	268815.8	21815.8	05 17 2019	05 29 2019	12	Closed	20891	Almoda Almacén de la Moda, SRL	Goods	Male	Legal Person	11 21 2012	Active	Small company	DISTRITO NACIONAL
264	MINISTERIO DE EDUCACION SUPERIOR, CIENCIA Y TECNOLOGIA	Minor Purchases	ordinary process	993160	601231	-391929	05 21 2019	05 31 2019	10	Closed	20891	Almoda Almacén de la Moda, SRL	Goods	Male	Legal Person	11 21 2012	Active	Small company	DISTRITO NACIONAL
174	Ministerio de la Mujer	Purchases Below the Threshold	ordinary process	103810.5	103810.5	0	05 23 2019	05 23 2019	0	Closed	20891	Almoda Almacén de la Moda, SRL	Goods	Male	Legal Person	11 21 2012	Active	Small company	DISTRITO NACIONAL
223	Dirección General de Aduanas y Puertos	Purchases Below the Threshold	ordinary process	32160	37948.8	5788.8	06 5 2019	06 5 2019	0	Closed	20891	Almoda Almacén de la Moda, SRL	Goods	Male	Legal Person	11 21 2012	Active	Small company	DISTRITO NACIONAL
223	Dirección General de Aduanas y Puertos	Purchases Below the Threshold	ordinary process	104655	123492.9	18837.9	06 6 2019	06 6 2019	0	Closed	20891	Almoda Almacén de la Moda, SRL	Goods	Male	Legal Person	11 21 2012	Active	Small company	DISTRITO NACIONAL
223	Dirección General de Aduanas y Puertos	Purchases Below the Threshold	ordinary process	130000	149860	19860	06 7 2019	06 10 2019	3	Closed	20891	Almoda Almacén de la Moda, SRL	Goods	Male	Legal Person	11 21 2012	Active	Small company	DISTRITO NACIONAL
223	Dirección General de Aduanas y Puertos	Purchases Below the Threshold	ordinary process	18990	21511.872	2521.872	06 10 2019	06 10 2019	0	Closed	20891	Almoda Almacén de la Moda, SRL	Goods	Male	Legal Person	11 21 2012	Active	Small company	DISTRITO NACIONAL
223	Dirección General de Aduanas y Puertos	Purchases Below the Threshold	ordinary process	21480	25346.4	3866.4	06 11 2019	06 25 2019	14	Closed	20891	Almoda Almacén de la Moda, SRL	Goods	Male	Legal Person	11 21 2012	Active	Small company	DISTRITO NACIONAL
223	Dirección General de Aduanas y Puertos	Purchases Below the Threshold	ordinary process	21480	25346.4	3866.4	06 11 2019	06 11 2019	0	Cancelled	20891	Almoda Almacén de la Moda, SRL	Goods	Male	Legal Person	11 21 2012	Active	Small company	DISTRITO NACIONAL
223	Dirección General de Aduanas y Puertos	Purchases Below the Threshold	ordinary process	13350	15753	2403	07 1 2019	07 1 2019	0	Closed	20891	Almoda Almacén de la Moda, SRL	Goods	Male	Legal Person	11 21 2012	Active	Small company	DISTRITO NACIONAL
223	Dirección General de Aduanas y Puertos	Purchases Below the Threshold	ordinary process	10135	8112.5	-2022.5	07 3 2019	07 8 2019	5	Closed	20891	Almoda Almacén de la Moda, SRL	Goods	Male	Legal Person	11 21 2012	Active	Small company	DISTRITO NACIONAL
174	Ministerio de la Mujer	Minor Purchases	ordinary process	1029999.5	1028960	-1039.5	07 4 2019	07 9 2019	5	Closed	20891	Almoda Almacén de la Moda, SRL	Goods	Male	Legal Person	11 21 2012	Active	Small company	DISTRITO NACIONAL
843	Consejo Nacional para la Niñez y la Adolescencia	Price Comparison	ordinary process	3900085	515220	-3384865	06 28 2019	07 18 2019	20	Active	20891	Almoda Almacén de la Moda, SRL	Goods	Male	Legal Person	11 21 2012	Active	Small company	DISTRITO NACIONAL
843	Consejo Nacional para la Niñez y la Adolescencia	Purchases Below the Threshold	ordinary process	104052	104052	0	07 18 2019	07 18 2019	0	Closed	20891	Almoda Almacén de la Moda, SRL	Goods	Male	Legal Person	11 21 2012	Active	Small company	DISTRITO NACIONAL
843	Consejo Nacional para la Niñez y la Adolescencia	Purchases Below the Threshold	ordinary process	131192.4	131192.4	0	07 18 2019	07 18 2019	0	Closed	20891	Almoda Almacén de la Moda, SRL	Goods	Male	Legal Person	11 21 2012	Active	Small company	DISTRITO NACIONAL
223	Dirección General de Aduanas y Puertos	Purchases Below the Threshold	ordinary process	70000.2	68994.6	-1005.6	07 24 2019	07 29 2019	5	Closed	20891	Almoda Almacén de la Moda, SRL	Goods	Male	Legal Person	11 21 2012	Active	Small company	DISTRITO NACIONAL
223	Dirección General de Aduanas y Puertos	Purchases Below the Threshold	ordinary process	46410	54763.8	8353.8	07 25 2019	07 30 2019	5	Closed	20891	Almoda Almacén de la Moda, SRL	Goods	Male	Legal Person	11 21 2012	Active	Small company	DISTRITO NACIONAL
843	Consejo Nacional para la Niñez y la Adolescencia	Price Comparison	ordinary process	3900000	1446249.064	-2453750.936	07 22 2019	08 22 2019	31	Active	20891	Almoda Almacén de la Moda, SRL	Goods	Male	Legal Person	11 21 2012	Active	Small company	DISTRITO NACIONAL
843	Consejo Nacional para la Niñez y la Adolescencia	Purchases Below the Threshold	ordinary process	129800	129800	0	08 1 2019	08 2 2019	1	Closed	20891	Almoda Almacén de la Moda, SRL	Goods	Male	Legal Person	11 21 2012	Active	Small company	DISTRITO NACIONAL
223	Dirección General de Aduanas y Puertos	Minor Purchases	ordinary process	582700	981080.1548	398380.1548	07 30 2019	08 28 2019	29	Closed	20891	Almoda Almacén de la Moda, SRL	Goods	Male	Legal Person	11 21 2012	Active	Small company	DISTRITO NACIONAL
223	Dirección General de Aduanas y Puertos	Purchases Below the Threshold	ordinary process	35280	41630.4	6350.4	08 5 2019	08 5 2019	0	Closed	20891	Almoda Almacén de la Moda, SRL	Goods	Male	Legal Person	11 21 2012	Active	Small company	DISTRITO NACIONAL
223	Dirección General de Aduanas y Puertos	Purchases Below the Threshold	ordinary process	16450	19411	2961	08 15 2019	08 15 2019	0	Closed	20891	Almoda Almacén de la Moda, SRL	Goods	Male	Legal Person	11 21 2012	Active	Small company	DISTRITO NACIONAL
223	Dirección General de Aduanas y Puertos	Purchases Below the Threshold	ordinary process	54950	64841	9891	08 19 2019	08 19 2019	0	Closed	20891	Almoda Almacén de la Moda, SRL	Goods	Male	Legal Person	11 21 2012	Active	Small company	DISTRITO NACIONAL
843	Consejo Nacional para la Niñez y la Adolescencia	Purchases Below the Threshold	ordinary process	90860	90860	0	08 23 2019	08 23 2019	0	Suspended	20891	Almoda Almacén de la Moda, SRL	Goods	Male	Legal Person	11 21 2012	Active	Small company	DISTRITO NACIONAL
223	Dirección General de Aduanas y Puertos	Purchases Below the Threshold	ordinary process	4680	5522.4	842.4	08 29 2019	08 29 2019	0	Closed	20891	Almoda Almacén de la Moda, SRL	Goods	Male	Legal Person	11 21 2012	Active	Small company	DISTRITO NACIONAL
223	Dirección General de Aduanas y Puertos	Purchases Below the Threshold	ordinary process	22680	26762.4	4082.4	08 30 2019	08 30 2019	0	Closed	20891	Almoda Almacén de la Moda, SRL	Goods	Male	Legal Person	11 21 2012	Active	Small company	DISTRITO NACIONAL
223	Dirección General de Aduanas y Puertos	Exception Processes	air tickets, repairs and fuels	65800	65800	0	01 2 2018	01 2 2018	0	Closed	18261	Elías Pérez Combustibles, SRL	Goods	Female	Legal Person	02 1 2012	Active	Unknown	SANTIAGO
195	Sistema Unico de Beneficiarios (SIUBEN)	Exception Processes	air tickets, repairs and fuels	500000	500000	0	01 22 2018	01 23 2018	1	Closed	18261	Elías Pérez Combustibles, SRL	Goods	Female	Legal Person	02 1 2012	Active	Unknown	SANTIAGO
636	Instituto Nacional de Protección de los Derechos del Consumidor	Exception Processes	air tickets, repairs and fuels	15000	15000	0	01 31 2018	01 31 2018	0	Active	18261	Elías Pérez Combustibles, SRL	Goods	Female	Legal Person	02 1 2012	Active	Unknown	SANTIAGO
636	Instituto Nacional de Protección de los Derechos del Consumidor	Exception Processes	air tickets, repairs and fuels	16000	16000	0	01 31 2018	01 31 2018	0	Active	18261	Elías Pérez Combustibles, SRL	Goods	Female	Legal Person	02 1 2012	Active	Unknown	SANTIAGO
632	Despacho de la Primera Dama	Exception Processes	air tickets, repairs and fuels	89999.7	89999.7	0	01 31 2018	01 31 2018	0	Active	18261	Elías Pérez Combustibles, SRL	Goods	Female	Legal Person	02 1 2012	Active	Unknown	SANTIAGO
134	Ministerio Administrativo de la Presidencia	Exception Processes	air tickets, repairs and fuels	34971.1	34971.1	0	02 5 2018	02 5 2018	0	Closed	18261	Elías Pérez Combustibles, SRL	Services	Female	Legal Person	02 1 2012	Active	Unknown	SANTIAGO
735	Instituto Dominicano de la Prevención y Protección de Riesgos Laborales	Exception Processes	air tickets, repairs and fuels	219200	219200000	218980800	02 7 2018	02 7 2018	0	In edition	18261	Elías Pérez Combustibles, SRL	Services	Female	Legal Person	02 1 2012	Active	Unknown	SANTIAGO
545	Tesorería de la Seguridad Social	Exception Processes	air tickets, repairs and fuels	94200	3500	-90700	02 7 2018	02 12 2018	5	Closed	18261	Elías Pérez Combustibles, SRL	Services	Female	Legal Person	02 1 2012	Active	Unknown	SANTIAGO
134	Ministerio Administrativo de la Presidencia	Exception Processes	air tickets, repairs and fuels	34997.6	34997.6	0	02 9 2018	02 9 2018	0	Closed	18261	Elías Pérez Combustibles, SRL	Services	Female	Legal Person	02 1 2012	Active	Unknown	SANTIAGO
735	Instituto Dominicano de la Prevención y Protección de Riesgos Laborales	Exception Processes	air tickets, repairs and fuels	219200	219200	0	02 13 2018	02 14 2018	1	In edition	18261	Elías Pérez Combustibles, SRL	Services	Female	Legal Person	02 1 2012	Active	Unknown	SANTIAGO
223	Dirección General de Aduanas y Puertos	Exception Processes	air tickets, repairs and fuels	76900	76900	0	02 16 2018	02 16 2018	0	Closed	18261	Elías Pérez Combustibles, SRL	Goods	Female	Legal Person	02 1 2012	Active	Unknown	SANTIAGO
240	Ministerio de Salud Pública y Asistencia Social	Exception Processes	air tickets, repairs and fuels	450000	450000	0	02 19 2018	02 20 2018	1	Closed	18261	Elías Pérez Combustibles, SRL	Goods	Female	Legal Person	02 1 2012	Active	Unknown	SANTIAGO
240	Ministerio de Salud Pública y Asistencia Social	Exception Processes	air tickets, repairs and fuels	50000	50000	0	02 21 2018	02 22 2018	1	Closed	18261	Elías Pérez Combustibles, SRL	Goods	Female	Legal Person	02 1 2012	Active	Unknown	SANTIAGO
582	Programa de Medicamentos Esenciales	Exception Processes	air tickets, repairs and fuels	1200000	1200000	0	02 22 2018	02 26 2018	4	Closed	18261	Elías Pérez Combustibles, SRL	Services	Female	Legal Person	02 1 2012	Active	Unknown	SANTIAGO
226	Ministerio de Agricultura	Exception Processes	air tickets, repairs and fuels	665160	665160	0	03 2 2018	03 7 2018	5	In edition	18261	Elías Pérez Combustibles, SRL	Goods	Female	Legal Person	02 1 2012	Active	Unknown	SANTIAGO
226	Ministerio de Agricultura	Exception Processes	air tickets, repairs and fuels	665160	665160	0	03 2 2018	03 7 2018	5	Cancelled	18261	Elías Pérez Combustibles, SRL	Unknown	Female	Legal Person	02 1 2012	Active	Unknown	SANTIAGO
545	Tesorería de la Seguridad Social	Exception Processes	air tickets, repairs and fuels	91200	3400	-87800	03 6 2018	03 7 2018	1	Closed	18261	Elías Pérez Combustibles, SRL	Goods	Female	Legal Person	02 1 2012	Active	Unknown	SANTIAGO
636	Instituto Nacional de Protección de los Derechos del Consumidor	Exception Processes	air tickets, repairs and fuels	16000	16000	0	03 9 2018	03 9 2018	0	Active	18261	Elías Pérez Combustibles, SRL	Goods	Female	Legal Person	02 1 2012	Active	Unknown	SANTIAGO
134	Ministerio Administrativo de la Presidencia	Exception Processes	air tickets, repairs and fuels	34840.4	34840.4	0	03 14 2018	03 14 2018	0	Closed	18261	Elías Pérez Combustibles, SRL	Services	Female	Legal Person	02 1 2012	Active	Unknown	SANTIAGO
223	Dirección General de Aduanas y Puertos	Exception Processes	air tickets, repairs and fuels	16835	16835	0	03 14 2018	03 14 2018	0	Closed	18261	Elías Pérez Combustibles, SRL	Goods	Female	Legal Person	02 1 2012	Active	Unknown	SANTIAGO
223	Dirección General de Aduanas y Puertos	Exception Processes	air tickets, repairs and fuels	50000	50000	0	03 19 2018	03 22 2018	3	Closed	18261	Elías Pérez Combustibles, SRL	Goods	Female	Legal Person	02 1 2012	Active	Unknown	SANTIAGO
240	Ministerio de Salud Pública y Asistencia Social	Exception Processes	air tickets, repairs and fuels	450000	450000	0	03 26 2018	03 26 2018	0	Closed	18261	Elías Pérez Combustibles, SRL	Goods	Female	Legal Person	02 1 2012	Active	Unknown	SANTIAGO
223	Dirección General de Aduanas y Puertos	Exception Processes	air tickets, repairs and fuels	32500	32500	0	04 3 2018	04 3 2018	0	Closed	18261	Elías Pérez Combustibles, SRL	Goods	Female	Legal Person	02 1 2012	Active	Unknown	SANTIAGO
545	Tesorería de la Seguridad Social	Exception Processes	air tickets, repairs and fuels	102200	3400	-98800	04 5 2018	04 5 2018	0	Closed	18261	Elías Pérez Combustibles, SRL	Goods	Female	Legal Person	02 1 2012	Active	Unknown	SANTIAGO
223	Dirección General de Aduanas y Puertos	Exception Processes	air tickets, repairs and fuels	82000	82000	0	04 10 2018	04 10 2018	0	Closed	18261	Elías Pérez Combustibles, SRL	Goods	Female	Legal Person	02 1 2012	Active	Unknown	SANTIAGO
636	Instituto Nacional de Protección de los Derechos del Consumidor	Purchases Below the Threshold	ordinary process	16000	16000	0	04 11 2018	04 11 2018	0	Active	18261	Elías Pérez Combustibles, SRL	Goods	Female	Legal Person	02 1 2012	Active	Unknown	SANTIAGO
134	Ministerio Administrativo de la Presidencia	Exception Processes	air tickets, repairs and fuels	34891.6	34891.6	0	04 17 2018	04 17 2018	0	Closed	18261	Elías Pérez Combustibles, SRL	Services	Female	Legal Person	02 1 2012	Active	Unknown	SANTIAGO
636	Instituto Nacional de Protección de los Derechos del Consumidor	Exception Processes	air tickets, repairs and fuels	16000	16000	0	04 27 2018	04 27 2018	0	Active	18261	Elías Pérez Combustibles, SRL	Goods	Female	Legal Person	02 1 2012	Active	Unknown	SANTIAGO
195	Sistema Unico de Beneficiarios (SIUBEN)	Exception Processes	air tickets, repairs and fuels	500000	500000	0	04 27 2018	05 2 2018	5	Closed	18261	Elías Pérez Combustibles, SRL	Goods	Female	Legal Person	02 1 2012	Active	Unknown	SANTIAGO
545	Tesorería de la Seguridad Social	Exception Processes	air tickets, repairs and fuels	155700	3600	-152100	05 4 2018	05 7 2018	3	Closed	18261	Elías Pérez Combustibles, SRL	Goods	Female	Legal Person	02 1 2012	Active	Unknown	SANTIAGO
134	Ministerio Administrativo de la Presidencia	Exception Processes	air tickets, repairs and fuels	34984.7	34984.7	0	05 7 2018	05 7 2018	0	Closed	18261	Elías Pérez Combustibles, SRL	Services	Female	Legal Person	02 1 2012	Active	Unknown	SANTIAGO
240	Ministerio de Salud Pública y Asistencia Social	Exception Processes	air tickets, repairs and fuels	600000	150000	-450000	05 7 2018	05 8 2018	1	Closed	18261	Elías Pérez Combustibles, SRL	Goods	Female	Legal Person	02 1 2012	Active	Unknown	SANTIAGO
226	Ministerio de Agricultura	Exception Processes	air tickets, repairs and fuels	665160	665160	0	05 8 2018	05 8 2018	0	In edition	18261	Elías Pérez Combustibles, SRL	Goods	Female	Legal Person	02 1 2012	Active	Unknown	SANTIAGO
898	Instituto Dominicano del Café	Exception Processes	air tickets, repairs and fuels	80000	80000	0	05 9 2018	05 9 2018	0	Active	18261	Elías Pérez Combustibles, SRL	Goods	Female	Legal Person	02 1 2012	Active	Unknown	SANTIAGO
898	Instituto Dominicano del Café	Exception Processes	air tickets, repairs and fuels	30000	30000	0	05 10 2018	05 10 2018	0	Modified	18261	Elías Pérez Combustibles, SRL	Goods	Female	Legal Person	02 1 2012	Active	Unknown	SANTIAGO
240	Ministerio de Salud Pública y Asistencia Social	Exception Processes	air tickets, repairs and fuels	1500000	1350000	-150000	05 10 2018	05 17 2018	7	Closed	18261	Elías Pérez Combustibles, SRL	Goods	Female	Legal Person	02 1 2012	Active	Unknown	SANTIAGO
632	Despacho de la Primera Dama	Exception Processes	air tickets, repairs and fuels	90000	90000	0	05 16 2018	05 16 2018	0	Active	18261	Elías Pérez Combustibles, SRL	Goods	Female	Legal Person	02 1 2012	Active	Unknown	SANTIAGO
195	Sistema Unico de Beneficiarios (SIUBEN)	Exception Processes	air tickets, repairs and fuels	135000	35000	-100000	05 17 2018	05 21 2018	4	Cancelled	18261	Elías Pérez Combustibles, SRL	Unknown	Female	Legal Person	02 1 2012	Active	Unknown	SANTIAGO
195	Sistema Unico de Beneficiarios (SIUBEN)	Exception Processes	air tickets, repairs and fuels	135000	35000	-100000	05 17 2018	05 21 2018	4	Closed	18261	Elías Pérez Combustibles, SRL	Services	Female	Legal Person	02 1 2012	Active	Unknown	SANTIAGO
582	Programa de Medicamentos Esenciales	Exception Processes	air tickets, repairs and fuels	500000	500000	0	05 18 2018	05 21 2018	3	Closed	18261	Elías Pérez Combustibles, SRL	Services	Female	Legal Person	02 1 2012	Active	Unknown	SANTIAGO
223	Dirección General de Aduanas y Puertos	Exception Processes	air tickets, repairs and fuels	50000	50000	0	05 22 2018	05 24 2018	2	Closed	18261	Elías Pérez Combustibles, SRL	Goods	Female	Legal Person	02 1 2012	Active	Unknown	SANTIAGO
735	Instituto Dominicano de la Prevención y Protección de Riesgos Laborales	Exception Processes	air tickets, repairs and fuels	232200	232200	0	05 23 2018	05 24 2018	1	Approved flow	18261	Elías Pérez Combustibles, SRL	Services	Female	Legal Person	02 1 2012	Active	Unknown	SANTIAGO
223	Dirección General de Aduanas y Puertos	Exception Processes	air tickets, repairs and fuels	45000	45000	0	05 28 2018	05 29 2018	1	Closed	18261	Elías Pérez Combustibles, SRL	Goods	Female	Legal Person	02 1 2012	Active	Unknown	SANTIAGO
636	Instituto Nacional de Protección de los Derechos del Consumidor	Exception Processes	air tickets, repairs and fuels	16000	16000	0	05 29 2018	05 29 2018	0	Active	18261	Elías Pérez Combustibles, SRL	Goods	Female	Legal Person	02 1 2012	Active	Unknown	SANTIAGO
545	Tesorería de la Seguridad Social	Exception Processes	air tickets, repairs and fuels	110100	3700	-106400	05 30 2018	06 1 2018	2	Closed	18261	Elías Pérez Combustibles, SRL	Goods	Female	Legal Person	02 1 2012	Active	Unknown	SANTIAGO
134	Ministerio Administrativo de la Presidencia	Exception Processes	air tickets, repairs and fuels	34950.1	34950.1	0	06 6 2018	06 6 2018	0	Closed	18261	Elías Pérez Combustibles, SRL	Goods	Female	Legal Person	02 1 2012	Active	Unknown	SANTIAGO
898	Instituto Dominicano del Café	Exception Processes	air tickets, repairs and fuels	80000	80000	0	06 8 2018	06 8 2018	0	Active	18261	Elías Pérez Combustibles, SRL	Goods	Female	Legal Person	02 1 2012	Active	Unknown	SANTIAGO
223	Dirección General de Aduanas y Puertos	Exception Processes	air tickets, repairs and fuels	50000	50000	0	06 12 2018	06 12 2018	0	Closed	18261	Elías Pérez Combustibles, SRL	Goods	Female	Legal Person	02 1 2012	Active	Unknown	SANTIAGO
898	Instituto Dominicano del Café	Exception Processes	air tickets, repairs and fuels	30000	30000	0	06 15 2018	06 15 2018	0	Active	18261	Elías Pérez Combustibles, SRL	Goods	Female	Legal Person	02 1 2012	Active	Unknown	SANTIAGO
223	Dirección General de Aduanas y Puertos	Exception Processes	air tickets, repairs and fuels	18200	18200	0	06 27 2018	06 28 2018	1	Closed	18261	Elías Pérez Combustibles, SRL	Goods	Female	Legal Person	02 1 2012	Active	Unknown	SANTIAGO
636	Instituto Nacional de Protección de los Derechos del Consumidor	Exception Processes	air tickets, repairs and fuels	15000	15000	0	06 29 2018	06 29 2018	0	Rescinded	18261	Elías Pérez Combustibles, SRL	Goods	Female	Legal Person	02 1 2012	Active	Unknown	SANTIAGO
545	Tesorería de la Seguridad Social	Exception Processes	air tickets, repairs and fuels	105500	3500	-102000	07 3 2018	07 4 2018	1	Closed	18261	Elías Pérez Combustibles, SRL	Goods	Female	Legal Person	02 1 2012	Active	Unknown	SANTIAGO
134	Ministerio Administrativo de la Presidencia	Exception Processes	air tickets, repairs and fuels	34930.9	34930.9	0	07 5 2018	07 5 2018	0	Closed	18261	Elías Pérez Combustibles, SRL	Goods	Female	Legal Person	02 1 2012	Active	Unknown	SANTIAGO
898	Instituto Dominicano del Café	Exception Processes	air tickets, repairs and fuels	80000	80000	0	07 6 2018	07 9 2018	3	Active	18261	Elías Pérez Combustibles, SRL	Goods	Female	Legal Person	02 1 2012	Active	Unknown	SANTIAGO
582	Programa de Medicamentos Esenciales	Exception Processes	air tickets, repairs and fuels	1315068	1200000	-115068	07 6 2018	07 6 2018	0	Closed	18261	Elías Pérez Combustibles, SRL	Services	Female	Legal Person	02 1 2012	Active	Unknown	SANTIAGO
636	Instituto Nacional de Protección de los Derechos del Consumidor	Purchases Below the Threshold	ordinary process	16000	16000	0	07 9 2018	07 9 2018	0	Active	18261	Elías Pérez Combustibles, SRL	Goods	Female	Legal Person	02 1 2012	Active	Unknown	SANTIAGO
223	Dirección General de Aduanas y Puertos	Exception Processes	air tickets, repairs and fuels	33000	33400	400	07 11 2018	07 11 2018	0	Closed	18261	Elías Pérez Combustibles, SRL	Goods	Female	Legal Person	02 1 2012	Active	Unknown	SANTIAGO
632	Despacho de la Primera Dama	Exception Processes	air tickets, repairs and fuels	79000	79000	0	07 12 2018	07 12 2018	0	Active	18261	Elías Pérez Combustibles, SRL	Goods	Female	Legal Person	02 1 2012	Active	Unknown	SANTIAGO
545	Tesorería de la Seguridad Social	Exception Processes	air tickets, repairs and fuels	107800	3600	-104200	07 17 2018	07 18 2018	1	Closed	18261	Elías Pérez Combustibles, SRL	Goods	Female	Legal Person	02 1 2012	Active	Unknown	SANTIAGO
240	Ministerio de Salud Pública y Asistencia Social	Exception Processes	air tickets, repairs and fuels	1350000	1350000	0	07 24 2018	07 25 2018	1	In edition	18261	Elías Pérez Combustibles, SRL	Goods	Female	Legal Person	02 1 2012	Active	Unknown	SANTIAGO
223	Dirección General de Aduanas y Puertos	Exception Processes	air tickets, repairs and fuels	50000	50000	0	07 25 2018	07 25 2018	0	Closed	18261	Elías Pérez Combustibles, SRL	Goods	Female	Legal Person	02 1 2012	Active	Unknown	SANTIAGO
735	Instituto Dominicano de la Prevención y Protección de Riesgos Laborales	Exception Processes	air tickets, repairs and fuels	226200	226200	0	07 31 2018	08 1 2018	1	Approved flow	18261	Elías Pérez Combustibles, SRL	Services	Female	Legal Person	02 1 2012	Active	Unknown	SANTIAGO
636	Instituto Nacional de Protección de los Derechos del Consumidor	Exception Processes	air tickets, repairs and fuels	16000	16000	0	08 7 2018	08 7 2018	0	Active	18261	Elías Pérez Combustibles, SRL	Goods	Female	Legal Person	02 1 2012	Active	Unknown	SANTIAGO
898	Instituto Dominicano del Café	Exception Processes	air tickets, repairs and fuels	80000	80000	0	08 9 2018	08 9 2018	0	Active	18261	Elías Pérez Combustibles, SRL	Goods	Female	Legal Person	02 1 2012	Active	Unknown	SANTIAGO
223	Dirección General de Aduanas y Puertos	Exception Processes	air tickets, repairs and fuels	50000	50000	0	08 9 2018	08 9 2018	0	Closed	18261	Elías Pérez Combustibles, SRL	Goods	Female	Legal Person	02 1 2012	Active	Unknown	SANTIAGO
134	Ministerio Administrativo de la Presidencia	Exception Processes	air tickets, repairs and fuels	34951.2	34951.2	0	08 9 2018	08 9 2018	0	Closed	18261	Elías Pérez Combustibles, SRL	Goods	Female	Legal Person	02 1 2012	Active	Unknown	SANTIAGO
226	Ministerio de Agricultura	Exception Processes	air tickets, repairs and fuels	702360	703960	1600	08 13 2018	08 13 2018	0	Cancelled	18261	Elías Pérez Combustibles, SRL	Goods	Female	Legal Person	02 1 2012	Active	Unknown	SANTIAGO
226	Ministerio de Agricultura	Exception Processes	air tickets, repairs and fuels	702360	702360	0	08 13 2018	08 14 2018	1	In edition	18261	Elías Pérez Combustibles, SRL	Goods	Female	Legal Person	02 1 2012	Active	Unknown	SANTIAGO
898	Instituto Dominicano del Café	Exception Processes	air tickets, repairs and fuels	30000	30000	0	08 15 2018	08 15 2018	0	Active	18261	Elías Pérez Combustibles, SRL	Goods	Female	Legal Person	02 1 2012	Active	Unknown	SANTIAGO
632	Despacho de la Primera Dama	Exception Processes	air tickets, repairs and fuels	62500	62500	0	08 22 2018	08 23 2018	1	Active	18261	Elías Pérez Combustibles, SRL	Goods	Female	Legal Person	02 1 2012	Active	Unknown	SANTIAGO
223	Dirección General de Aduanas y Puertos	Purchases Below the Threshold	ordinary process	38000	37745	-255	08 30 2018	08 30 2018	0	Closed	18261	Elías Pérez Combustibles, SRL	Goods	Female	Legal Person	02 1 2012	Active	Unknown	SANTIAGO
636	Instituto Nacional de Protección de los Derechos del Consumidor	Purchases Below the Threshold	ordinary process	16000	16000	0	09 4 2018	09 4 2018	0	In edition	18261	Elías Pérez Combustibles, SRL	Goods	Female	Legal Person	02 1 2012	Active	Unknown	SANTIAGO
223	Dirección General de Aduanas y Puertos	Purchases Below the Threshold	ordinary process	97063	83000	-14063	09 21 2018	09 21 2018	0	Active	18261	Elías Pérez Combustibles, SRL	Goods	Female	Legal Person	02 1 2012	Active	Unknown	SANTIAGO
735	Instituto Dominicano de la Prevención y Protección de Riesgos Laborales	Minor Purchases	ordinary process	699990	690600	-9390	09 26 2018	10 1 2018	5	Closed	18261	Elías Pérez Combustibles, SRL	Services	Female	Legal Person	02 1 2012	Active	Unknown	SANTIAGO
632	Despacho de la Primera Dama	Purchases Below the Threshold	ordinary process	38500	38500	0	10 1 2018	10 1 2018	0	Active	18261	Elías Pérez Combustibles, SRL	Goods	Female	Legal Person	02 1 2012	Active	Unknown	SANTIAGO
223	Dirección General de Aduanas y Puertos	Purchases Below the Threshold	ordinary process	50000	50000	0	10 23 2018	10 24 2018	1	Closed	18261	Elías Pérez Combustibles, SRL	Goods	Female	Legal Person	02 1 2012	Active	Unknown	SANTIAGO
223	Dirección General de Aduanas y Puertos	Purchases Below the Threshold	ordinary process	34000	33635	-365	10 26 2018	10 29 2018	3	Closed	18261	Elías Pérez Combustibles, SRL	Goods	Female	Legal Person	02 1 2012	Active	Unknown	SANTIAGO
632	Despacho de la Primera Dama	Purchases Below the Threshold	ordinary process	120000	120000	0	11 1 2018	11 1 2018	0	Active	18261	Elías Pérez Combustibles, SRL	Goods	Female	Legal Person	02 1 2012	Active	Unknown	SANTIAGO
636	Instituto Nacional de Protección de los Derechos del Consumidor	Purchases Below the Threshold	ordinary process	48000	48000	0	11 21 2018	11 21 2018	0	Modified	18261	Elías Pérez Combustibles, SRL	Goods	Female	Legal Person	02 1 2012	Active	Unknown	SANTIAGO
223	Dirección General de Aduanas y Puertos	Purchases Below the Threshold	ordinary process	108600	108600	0	12 11 2018	12 11 2018	0	Active	18261	Elías Pérez Combustibles, SRL	Goods	Female	Legal Person	02 1 2012	Active	Unknown	SANTIAGO
223	Dirección General de Aduanas y Puertos	Purchases Below the Threshold	ordinary process	22400	22400	0	01 7 2019	01 7 2019	0	Closed	18261	Elías Pérez Combustibles, SRL	Goods	Female	Legal Person	02 1 2012	Active	Unknown	SANTIAGO
223	Dirección General de Aduanas y Puertos	Purchases Below the Threshold	ordinary process	50000	50000	0	01 9 2019	01 9 2019	0	Closed	18261	Elías Pérez Combustibles, SRL	Goods	Female	Legal Person	02 1 2012	Active	Unknown	SANTIAGO
693	Instituto Nacional del Tabaco (INTABACO)	Price Comparison	ordinary process	3800000	3800000	0	01 15 2019	02 7 2019	23	Modified	18261	Elías Pérez Combustibles, SRL	Goods	Female	Legal Person	02 1 2012	Active	Unknown	SANTIAGO
632	Despacho de la Primera Dama	Purchases Below the Threshold	ordinary process	81200	81200	0	02 4 2019	02 4 2019	0	Closed	18261	Elías Pérez Combustibles, SRL	Goods	Female	Legal Person	02 1 2012	Active	Unknown	SANTIAGO
223	Dirección General de Aduanas y Puertos	Purchases Below the Threshold	ordinary process	53000	76500	23500	03 20 2019	03 21 2019	1	Closed	18261	Elías Pérez Combustibles, SRL	Goods	Female	Legal Person	02 1 2012	Active	Unknown	SANTIAGO
223	Dirección General de Aduanas y Puertos	Purchases Below the Threshold	ordinary process	70000	120550	50550	04 12 2019	04 15 2019	3	Closed	18261	Elías Pérez Combustibles, SRL	Goods	Female	Legal Person	02 1 2012	Active	Unknown	SANTIAGO
632	Despacho de la Primera Dama	Purchases Below the Threshold	ordinary process	115000	115000	0	04 15 2019	04 15 2019	0	Closed	18261	Elías Pérez Combustibles, SRL	Goods	Female	Legal Person	02 1 2012	Active	Unknown	SANTIAGO
223	Dirección General de Aduanas y Puertos	Purchases Below the Threshold	ordinary process	45000	72500	27500	04 25 2019	05 1 2019	6	Closed	18261	Elías Pérez Combustibles, SRL	Goods	Female	Legal Person	02 1 2012	Active	Unknown	SANTIAGO
223	Dirección General de Aduanas y Puertos	Purchases Below the Threshold	ordinary process	45000	95000	50000	06 5 2019	06 6 2019	1	Closed	18261	Elías Pérez Combustibles, SRL	Goods	Female	Legal Person	02 1 2012	Active	Unknown	SANTIAGO
632	Despacho de la Primera Dama	Purchases Below the Threshold	ordinary process	108500	108500	0	07 5 2019	07 5 2019	0	Closed	18261	Elías Pérez Combustibles, SRL	Goods	Female	Legal Person	02 1 2012	Active	Unknown	SANTIAGO
223	Dirección General de Aduanas y Puertos	Purchases Below the Threshold	ordinary process	32000	32200	200	07 11 2019	07 11 2019	0	Closed	18261	Elías Pérez Combustibles, SRL	Goods	Female	Legal Person	02 1 2012	Active	Unknown	SANTIAGO
223	Dirección General de Aduanas y Puertos	Purchases Below the Threshold	ordinary process	12700	12700	0	07 24 2019	07 26 2019	2	Closed	18261	Elías Pérez Combustibles, SRL	Goods	Female	Legal Person	02 1 2012	Active	Unknown	SANTIAGO
223	Dirección General de Aduanas y Puertos	Purchases Below the Threshold	ordinary process	29500	29500	0	08 26 2019	08 29 2019	3	Closed	18261	Elías Pérez Combustibles, SRL	Goods	Female	Legal Person	02 1 2012	Active	Unknown	SANTIAGO
632	Despacho de la Primera Dama	Purchases Below the Threshold	ordinary process	130575	130575	0	08 29 2019	08 29 2019	0	Closed	18261	Elías Pérez Combustibles, SRL	Services	Female	Legal Person	02 1 2012	Active	Unknown	SANTIAGO
632	Despacho de la Primera Dama	Purchases Below the Threshold	ordinary process	132495	132375	-120	09 16 2019	09 16 2019	0	Closed	18261	Elías Pérez Combustibles, SRL	Goods	Female	Legal Person	02 1 2012	Active	Unknown	SANTIAGO
223	Dirección General de Aduanas y Puertos	Purchases Below the Threshold	ordinary process	22000	20900	-1100	09 20 2019	09 20 2019	0	Closed	18261	Elías Pérez Combustibles, SRL	Goods	Female	Legal Person	02 1 2012	Active	Unknown	SANTIAGO
632	Despacho de la Primera Dama	Purchases Below the Threshold	ordinary process	90000	90000	0	09 25 2019	09 25 2019	0	Closed	18261	Elías Pérez Combustibles, SRL	Goods	Female	Legal Person	02 1 2012	Active	Unknown	SANTIAGO
720	Dirección nacional de Ética e Integridad Gubernamental	Purchases Below the Threshold	ordinary process	65000	65000	0	09 25 2019	09 26 2019	1	Closed	18261	Elías Pérez Combustibles, SRL	Goods	Female	Legal Person	02 1 2012	Active	Unknown	SANTIAGO
223	Dirección General de Aduanas y Puertos	Purchases Below the Threshold	ordinary process	21000	20600	-400	10 25 2019	10 25 2019	0	Closed	18261	Elías Pérez Combustibles, SRL	Goods	Female	Legal Person	02 1 2012	Active	Unknown	SANTIAGO
735	Instituto Dominicano de la Prevención y Protección de Riesgos Laborales	Minor Purchases	ordinary process	824900	824900	0	10 28 2019	10 31 2019	3	Active	18261	Elías Pérez Combustibles, SRL	Services	Female	Legal Person	02 1 2012	Active	Unknown	SANTIAGO
693	Instituto Nacional del Tabaco (INTABACO)	Price Comparison	ordinary process	3800000.09	3675000.921	-124999.169	11 12 2019	12 6 2019	24	Active	18261	Elías Pérez Combustibles, SRL	Goods	Female	Legal Person	02 1 2012	Active	Unknown	SANTIAGO
632	Despacho de la Primera Dama	Purchases Below the Threshold	ordinary process	120000	120000	0	12 5 2019	12 5 2019	0	Closed	18261	Elías Pérez Combustibles, SRL	Goods	Female	Legal Person	02 1 2012	Active	Unknown	SANTIAGO
223	Dirección General de Aduanas y Puertos	Purchases Below the Threshold	ordinary process	29000	28200	-800	12 9 2019	12 9 2019	0	Closed	18261	Elías Pérez Combustibles, SRL	Goods	Female	Legal Person	02 1 2012	Active	Unknown	SANTIAGO
720	Dirección nacional de Ética e Integridad Gubernamental	Purchases Below the Threshold	ordinary process	90000	90000	0	01 22 2020	01 24 2020	2	Closed	18261	Elías Pérez Combustibles, SRL	Services	Female	Legal Person	02 1 2012	Active	Unknown	SANTIAGO
223	Dirección General de Aduanas y Puertos	Purchases Below the Threshold	ordinary process	26200.01	26200.01	0	01 29 2020	01 30 2020	1	Closed	18261	Elías Pérez Combustibles, SRL	Goods	Female	Legal Person	02 1 2012	Active	Unknown	SANTIAGO
632	Despacho de la Primera Dama	Purchases Below the Threshold	ordinary process	107000	107000	0	03 11 2020	03 12 2020	1	Closed	18261	Elías Pérez Combustibles, SRL	Goods	Female	Legal Person	02 1 2012	Active	Unknown	SANTIAGO
223	Dirección General de Aduanas y Puertos	Purchases Below the Threshold	ordinary process	21525.42	25400.0001	3874.5801	03 24 2020	03 24 2020	0	Closed	18261	Elías Pérez Combustibles, SRL	Goods	Female	Legal Person	02 1 2012	Active	Unknown	SANTIAGO
693	Instituto Nacional del Tabaco (INTABACO)	National Public Tender	ordinary process	16999998.43	8800012.29	-8199986.14	03 2 2020	04 21 2020	50	Closed	18261	Elías Pérez Combustibles, SRL	Goods	Female	Legal Person	02 1 2012	Active	Unknown	SANTIAGO
223	Dirección General de Aduanas y Puertos	Purchases Below the Threshold	ordinary process	50900	50900	0	04 16 2020	04 16 2020	0	Closed	18261	Elías Pérez Combustibles, SRL	Goods	Female	Legal Person	02 1 2012	Active	Unknown	SANTIAGO
223	Dirección General de Aduanas y Puertos	Purchases Below the Threshold	ordinary process	14000	14700	700	05 12 2020	05 12 2020	0	Closed	18261	Elías Pérez Combustibles, SRL	Goods	Female	Legal Person	02 1 2012	Active	Unknown	SANTIAGO
693	Instituto Nacional del Tabaco (INTABACO)	Price Comparison	ordinary process	4106500	2007915	-2098585	06 4 2020	06 22 2020	18	Closed	18261	Elías Pérez Combustibles, SRL	Goods	Female	Legal Person	02 1 2012	Active	Unknown	SANTIAGO
223	Dirección General de Aduanas y Puertos	Purchases Below the Threshold	ordinary process	12100	12100	0	06 30 2020	07 9 2020	9	Closed	18261	Elías Pérez Combustibles, SRL	Goods	Female	Legal Person	02 1 2012	Active	Unknown	SANTIAGO
223	Dirección General de Aduanas y Puertos	Purchases Below the Threshold	ordinary process	7800	7800	0	07 24 2020	07 24 2020	0	Closed	18261	Elías Pérez Combustibles, SRL	Goods	Female	Legal Person	02 1 2012	Active	Unknown	SANTIAGO
223	Dirección General de Aduanas y Puertos	Purchases Below the Threshold	ordinary process	25000	25000	0	09 28 2020	09 28 2020	0	Closed	18261	Elías Pérez Combustibles, SRL	Goods	Female	Legal Person	02 1 2012	Active	Unknown	SANTIAGO
735	Instituto Dominicano de la Prevención y Protección de Riesgos Laborales	Purchases Below the Threshold	ordinary process	98150	98150	0	12 8 2020	12 8 2020	0	Active	18261	Elías Pérez Combustibles, SRL	Services	Female	Legal Person	02 1 2012	Active	Unknown	SANTIAGO
223	Dirección General de Aduanas y Puertos	Purchases Below the Threshold	ordinary process	14001.67	14001.67	0	02 26 2021	02 26 2021	0	Closed	18261	Elías Pérez Combustibles, SRL	Goods	Female	Legal Person	02 1 2012	Active	Unknown	SANTIAGO
223	Dirección General de Aduanas y Puertos	Purchases Below the Threshold	ordinary process	33701.33	33701.33	0	04 15 2021	04 15 2021	0	Closed	18261	Elías Pérez Combustibles, SRL	Goods	Female	Legal Person	02 1 2012	Active	Unknown	SANTIAGO
223	Dirección General de Aduanas y Puertos	Purchases Below the Threshold	ordinary process	22300.48	22300.48	0	05 7 2021	05 7 2021	0	Closed	18261	Elías Pérez Combustibles, SRL	Goods	Female	Legal Person	02 1 2012	Active	Unknown	SANTIAGO
223	Dirección General de Aduanas y Puertos	Purchases Below the Threshold	ordinary process	67201.82	67201.82	0	06 28 2021	06 29 2021	1	Active	18261	Elías Pérez Combustibles, SRL	Unknown	Female	Legal Person	02 1 2012	Active	Unknown	SANTIAGO
735	Instituto Dominicano de la Prevención y Protección de Riesgos Laborales	Purchases Below the Threshold	ordinary process	137250	137250	0	08 11 2022	08 11 2022	0	Active	18261	Elías Pérez Combustibles, SRL	Goods	Female	Legal Person	02 1 2012	Active	Unknown	SANTIAGO
735	Instituto Dominicano de la Prevención y Protección de Riesgos Laborales	Minor Purchases	ordinary process	228000	218800	-9200	05 17 2023	05 29 2023	12	Active	18261	Elías Pérez Combustibles, SRL	Goods	Female	Legal Person	02 1 2012	Active	Unknown	SANTIAGO
207	Programa Supérate	Purchases Below the Threshold	ordinary process	80417.12	96861.5862	16444.4662	01 2 2018	01 4 2018	2	Closed	31466	Wendy Carolina Rodriguez Feliz	Goods	Female	Natural Person	06 5 2013	Active	Woman MSME - Micro Company	SANTO DOMINGO
207	Programa Supérate	Purchases Below the Threshold	ordinary process	93379.61	106703.6476	13324.0376	01 3 2018	01 3 2018	0	Closed	31466	Wendy Carolina Rodriguez Feliz	Goods	Female	Natural Person	06 5 2013	Active	Woman MSME - Micro Company	SANTO DOMINGO
207	Programa Supérate	Purchases Below the Threshold	ordinary process	67000	79744.4	12744.4	10 2 2019	10 4 2019	2	Closed	31466	Wendy Carolina Rodriguez Feliz	Services	Female	Natural Person	06 5 2013	Active	Woman MSME - Micro Company	SANTO DOMINGO
207	Programa Supérate	Purchases Below the Threshold	ordinary process	15000	10030	-4970	10 23 2019	10 23 2019	0	Closed	31466	Wendy Carolina Rodriguez Feliz	Services	Female	Natural Person	06 5 2013	Active	Woman MSME - Micro Company	SANTO DOMINGO
936	Instituto Nacional de Migración	Purchases Below the Threshold	ordinary process	6442.8	6442.8	0	01 2 2018	01 2 2018	0	Active	1774	Repuestos de Jesús, SRL	Goods	Female	Legal Person	09 15 2006	Active	Unknown	DISTRITO NACIONAL
223	Dirección General de Aduanas y Puertos	Exception Processes	air tickets, repairs and fuels	52030	61395.4	9365.4	01 19 2018	01 24 2018	5	Closed	1774	Repuestos de Jesús, SRL	Services	Female	Legal Person	09 15 2006	Active	Unknown	DISTRITO NACIONAL
223	Dirección General de Aduanas y Puertos	Exception Processes	air tickets, repairs and fuels	48212	56890.16	8678.16	02 21 2018	02 23 2018	2	Closed	1774	Repuestos de Jesús, SRL	Services	Female	Legal Person	09 15 2006	Active	Unknown	DISTRITO NACIONAL
223	Dirección General de Aduanas y Puertos	Exception Processes	air tickets, repairs and fuels	103028	121573.04	18545.04	02 22 2018	03 13 2018	19	Closed	1774	Repuestos de Jesús, SRL	Services	Female	Legal Person	09 15 2006	Active	Unknown	DISTRITO NACIONAL
225	Ministerio de Deportes, Educación Física y Recreación	Exception Processes	air tickets, repairs and fuels	13100.3	15458.354	2358.054	02 26 2018	02 26 2018	0	Closed	1774	Repuestos de Jesús, SRL	Services	Female	Legal Person	09 15 2006	Active	Unknown	DISTRITO NACIONAL
195	Sistema Unico de Beneficiarios (SIUBEN)	Exception Processes	air tickets, repairs and fuels	11270	13298.6	2028.6	03 5 2018	03 9 2018	4	Closed	1774	Repuestos de Jesús, SRL	Services	Female	Legal Person	09 15 2006	Active	Unknown	DISTRITO NACIONAL
260	Ministerio de Medio Ambiente	Purchases Below the Threshold	ordinary process	3600	4248	648	03 12 2018	03 16 2018	4	Active	1774	Repuestos de Jesús, SRL	Goods	Female	Legal Person	09 15 2006	Active	Unknown	DISTRITO NACIONAL
223	Dirección General de Aduanas y Puertos	Exception Processes	air tickets, repairs and fuels	30502	35992.36	5490.36	03 13 2018	03 16 2018	3	Closed	1774	Repuestos de Jesús, SRL	Services	Female	Legal Person	09 15 2006	Active	Unknown	DISTRITO NACIONAL
225	Ministerio de Deportes, Educación Física y Recreación	Exception Processes	air tickets, repairs and fuels	16203.25	19119.8468	2916.5968	03 13 2018	03 13 2018	0	In edition	1774	Repuestos de Jesús, SRL	Services	Female	Legal Person	09 15 2006	Active	Unknown	DISTRITO NACIONAL
225	Ministerio de Deportes, Educación Física y Recreación	Purchases Below the Threshold	ordinary process	4700	5546	846	03 15 2018	03 16 2018	1	Closed	1774	Repuestos de Jesús, SRL	Goods	Female	Legal Person	09 15 2006	Active	Unknown	DISTRITO NACIONAL
178	Gabinete de Coordinación de Políticas Sociales	Purchases Below the Threshold	ordinary process	2159.4	2159.4	0	03 21 2018	03 21 2018	0	Closed	1774	Repuestos de Jesús, SRL	Services	Female	Legal Person	09 15 2006	Active	Unknown	DISTRITO NACIONAL
195	Sistema Unico de Beneficiarios (SIUBEN)	Purchases Below the Threshold	ordinary process	18930	22058.92	3128.92	03 22 2018	03 23 2018	1	Closed	1774	Repuestos de Jesús, SRL	Goods	Female	Legal Person	09 15 2006	Active	Unknown	DISTRITO NACIONAL
176	Instituto Nacional de Administración Pública	Purchases Below the Threshold	ordinary process	11466	13417.78	1951.78	03 23 2018	03 23 2018	0	Closed	1774	Repuestos de Jesús, SRL	Services	Female	Legal Person	09 15 2006	Active	Unknown	DISTRITO NACIONAL
223	Dirección General de Aduanas y Puertos	Exception Processes	air tickets, repairs and fuels	34387	40576.66	6189.66	03 26 2018	03 27 2018	1	Closed	1774	Repuestos de Jesús, SRL	Services	Female	Legal Person	09 15 2006	Active	Unknown	DISTRITO NACIONAL
180	Dirección General de Seguridad de Tránsito y Transporte Terrestre	Minor Purchases	ordinary process	508470	599994.6	91524.6	03 23 2018	04 2 2018	10	Closed	1774	Repuestos de Jesús, SRL	Goods	Female	Legal Person	09 15 2006	Active	Unknown	DISTRITO NACIONAL
171	Ejército de República Dominicana	Purchases Below the Threshold	ordinary process	18100	20355	2255	03 28 2018	03 28 2018	0	Approved flow	1774	Repuestos de Jesús, SRL	Goods	Female	Legal Person	09 15 2006	Active	Unknown	DISTRITO NACIONAL
195	Sistema Unico de Beneficiarios (SIUBEN)	Purchases Below the Threshold	ordinary process	31800	33630	1830	04 4 2018	04 4 2018	0	Rescinded	1774	Repuestos de Jesús, SRL	Goods	Female	Legal Person	09 15 2006	Active	Unknown	DISTRITO NACIONAL
207	Programa Supérate	Exception Processes	air tickets, repairs and fuels	42000	41592.64	-407.36	04 4 2018	04 6 2018	2	Closed	1774	Repuestos de Jesús, SRL	Services	Female	Legal Person	09 15 2006	Active	Unknown	DISTRITO NACIONAL
195	Sistema Unico de Beneficiarios (SIUBEN)	Purchases Below the Threshold	ordinary process	6700	2655	-4045	04 10 2018	04 11 2018	1	Closed	1774	Repuestos de Jesús, SRL	Goods	Female	Legal Person	09 15 2006	Active	Unknown	DISTRITO NACIONAL
225	Ministerio de Deportes, Educación Física y Recreación	Exception Processes	air tickets, repairs and fuels	69210.9	81668.862	12457.962	04 13 2018	05 8 2018	25	Closed	1774	Repuestos de Jesús, SRL	Services	Female	Legal Person	09 15 2006	Active	Unknown	DISTRITO NACIONAL
207	Programa Supérate	Exception Processes	air tickets, repairs and fuels	1300	12602.4	11302.4	04 17 2018	04 17 2018	0	Closed	1774	Repuestos de Jesús, SRL	Services	Female	Legal Person	09 15 2006	Active	Unknown	DISTRITO NACIONAL
145	Instituto Policial de Educación	Purchases Below the Threshold	ordinary process	79082.88	93317.7984	14234.9184	05 3 2018	05 3 2018	0	Closed	1774	Repuestos de Jesús, SRL	Goods	Female	Legal Person	09 15 2006	Active	Unknown	DISTRITO NACIONAL
175	Ministerio de Administración Pública	Exception Processes	air tickets, repairs and fuels	27799.62	27799.62	0	05 3 2018	05 8 2018	5	Closed	1774	Repuestos de Jesús, SRL	Services	Female	Legal Person	09 15 2006	Active	Unknown	DISTRITO NACIONAL
207	Programa Supérate	Purchases Below the Threshold	ordinary process	76000	51743	-24257	05 15 2018	05 24 2018	9	Closed	1774	Repuestos de Jesús, SRL	Services	Female	Legal Person	09 15 2006	Active	Unknown	DISTRITO NACIONAL
207	Programa Supérate	Exception Processes	air tickets, repairs and fuels	112100	110458.325	-1641.675	05 30 2018	05 30 2018	0	Closed	1774	Repuestos de Jesús, SRL	Services	Female	Legal Person	09 15 2006	Active	Unknown	DISTRITO NACIONAL
207	Programa Supérate	Exception Processes	air tickets, repairs and fuels	7000	6407.4	-592.6	05 30 2018	06 1 2018	2	Closed	1774	Repuestos de Jesús, SRL	Services	Female	Legal Person	09 15 2006	Active	Unknown	DISTRITO NACIONAL
207	Programa Supérate	Purchases Below the Threshold	ordinary process	16600	18933.1	2333.1	06 4 2018	06 4 2018	0	Closed	1774	Repuestos de Jesús, SRL	Services	Female	Legal Person	09 15 2006	Active	Unknown	DISTRITO NACIONAL
886	Comisión para la Readecuación de La Barquita y Entorno.	Purchases Below the Threshold	ordinary process	84240	84228.4	-11.6	06 18 2018	06 18 2018	0	Active	1774	Repuestos de Jesús, SRL	Goods	Female	Legal Person	09 15 2006	Active	Unknown	DISTRITO NACIONAL
207	Programa Supérate	Exception Processes	air tickets, repairs and fuels	67500	66668.938	-831.062	06 21 2018	06 21 2018	0	Closed	1774	Repuestos de Jesús, SRL	Services	Female	Legal Person	09 15 2006	Active	Unknown	DISTRITO NACIONAL
195	Sistema Unico de Beneficiarios (SIUBEN)	Purchases Below the Threshold	ordinary process	2360	2360	0	06 21 2018	06 22 2018	1	Closed	1774	Repuestos de Jesús, SRL	Services	Female	Legal Person	09 15 2006	Active	Unknown	DISTRITO NACIONAL
207	Programa Supérate	Exception Processes	air tickets, repairs and fuels	23000	22988.76	-11.24	07 9 2018	07 10 2018	1	Closed	1774	Repuestos de Jesús, SRL	Services	Female	Legal Person	09 15 2006	Active	Unknown	DISTRITO NACIONAL
178	Gabinete de Coordinación de Políticas Sociales	Purchases Below the Threshold	ordinary process	5711.2	5711.2	0	07 17 2018	07 17 2018	0	Closed	1774	Repuestos de Jesús, SRL	Goods	Female	Legal Person	09 15 2006	Active	Unknown	DISTRITO NACIONAL
260	Ministerio de Medio Ambiente	Purchases Below the Threshold	ordinary process	15910	20762.1	4852.1	07 19 2018	08 6 2018	18	Closed	1774	Repuestos de Jesús, SRL	Goods	Female	Legal Person	09 15 2006	Active	Unknown	DISTRITO NACIONAL
260	Ministerio de Medio Ambiente	Purchases Below the Threshold	ordinary process	15910	17595	1685	07 19 2018	07 24 2018	5	Cancelled	1774	Repuestos de Jesús, SRL	Unknown	Female	Legal Person	09 15 2006	Active	Unknown	DISTRITO NACIONAL
176	Instituto Nacional de Administración Pública	Purchases Below the Threshold	ordinary process	12098.9	14276.702	2177.802	07 24 2018	07 24 2018	0	Closed	1774	Repuestos de Jesús, SRL	Services	Female	Legal Person	09 15 2006	Active	Unknown	DISTRITO NACIONAL
178	Gabinete de Coordinación de Políticas Sociales	Exception Processes	air tickets, repairs and fuels	6230.4	6230.4	0	07 25 2018	07 25 2018	0	Closed	1774	Repuestos de Jesús, SRL	Goods	Female	Legal Person	09 15 2006	Active	Unknown	DISTRITO NACIONAL
175	Ministerio de Administración Pública	Exception Processes	air tickets, repairs and fuels	30001	41610.34	11609.34	07 31 2018	08 8 2018	8	Closed	1774	Repuestos de Jesús, SRL	Services	Female	Legal Person	09 15 2006	Active	Unknown	DISTRITO NACIONAL
1020	Consejo de Coordinación de la Zona Especial de Desarrollo Fronterizo	Purchases Below the Threshold	ordinary process	6273.8	8701.084	2427.284	08 8 2018	08 8 2018	0	Active	1774	Repuestos de Jesús, SRL	Goods	Female	Legal Person	09 15 2006	Active	Unknown	DISTRITO NACIONAL
225	Ministerio de Deportes, Educación Física y Recreación	Exception Processes	air tickets, repairs and fuels	9541	11258.38	1717.38	08 9 2018	08 9 2018	0	Closed	1774	Repuestos de Jesús, SRL	Services	Female	Legal Person	09 15 2006	Active	Unknown	DISTRITO NACIONAL
207	Programa Supérate	Exception Processes	air tickets, repairs and fuels	279700	277417.1209	-2282.8791	08 9 2018	08 9 2018	0	Closed	1774	Repuestos de Jesús, SRL	Services	Female	Legal Person	09 15 2006	Active	Unknown	DISTRITO NACIONAL
207	Programa Supérate	Purchases Below the Threshold	ordinary process	14985	13275	-1710	08 10 2018	08 13 2018	3	Closed	1774	Repuestos de Jesús, SRL	Services	Female	Legal Person	09 15 2006	Active	Unknown	DISTRITO NACIONAL
225	Ministerio de Deportes, Educación Física y Recreación	Exception Processes	air tickets, repairs and fuels	16225	19145.5	2920.5	09 27 2018	08 17 2018	-41	Closed	1774	Repuestos de Jesús, SRL	Services	Female	Legal Person	09 15 2006	Active	Unknown	DISTRITO NACIONAL
225	Ministerio de Deportes, Educación Física y Recreación	Exception Processes	air tickets, repairs and fuels	2149.5	2536.41	386.91	08 23 2018	08 23 2018	0	Closed	1774	Repuestos de Jesús, SRL	Services	Female	Legal Person	09 15 2006	Active	Unknown	DISTRITO NACIONAL
180	Dirección General de Seguridad de Tránsito y Transporte Terrestre	Minor Purchases	ordinary process	340707.5	395131.85	54424.35	08 21 2018	08 23 2018	2	Closed	1774	Repuestos de Jesús, SRL	Goods	Female	Legal Person	09 15 2006	Active	Unknown	DISTRITO NACIONAL
207	Programa Supérate	Exception Processes	air tickets, repairs and fuels	3400	3292.2	-107.8	08 24 2018	08 24 2018	0	Closed	1774	Repuestos de Jesús, SRL	Services	Female	Legal Person	09 15 2006	Active	Unknown	DISTRITO NACIONAL
225	Ministerio de Deportes, Educación Física y Recreación	Purchases Below the Threshold	ordinary process	8455	9976.9	1521.9	08 27 2018	08 27 2018	0	Closed	1774	Repuestos de Jesús, SRL	Services	Female	Legal Person	09 15 2006	Active	Unknown	DISTRITO NACIONAL
175	Ministerio de Administración Pública	Minor Purchases	ordinary process	764000	88500	-675500	08 28 2018	09 12 2018	15	Closed	1774	Repuestos de Jesús, SRL	Services	Female	Legal Person	09 15 2006	Active	Unknown	DISTRITO NACIONAL
1020	Consejo de Coordinación de la Zona Especial de Desarrollo Fronterizo	Purchases Below the Threshold	ordinary process	22600	26668	4068	08 30 2018	08 30 2018	0	Active	1774	Repuestos de Jesús, SRL	Goods	Female	Legal Person	09 15 2006	Active	Unknown	DISTRITO NACIONAL
225	Ministerio de Deportes, Educación Física y Recreación	Purchases Below the Threshold	ordinary process	9312	10988.16	1676.16	09 3 2018	09 3 2018	0	Closed	1774	Repuestos de Jesús, SRL	Services	Female	Legal Person	09 15 2006	Active	Unknown	DISTRITO NACIONAL
225	Ministerio de Deportes, Educación Física y Recreación	Purchases Below the Threshold	ordinary process	21422	25277.96	3855.96	09 14 2018	09 18 2018	4	Closed	1774	Repuestos de Jesús, SRL	Services	Female	Legal Person	09 15 2006	Active	Unknown	DISTRITO NACIONAL
225	Ministerio de Deportes, Educación Física y Recreación	Purchases Below the Threshold	ordinary process	16060	18950.8	2890.8	09 25 2018	09 25 2018	0	Closed	1774	Repuestos de Jesús, SRL	Goods	Female	Legal Person	09 15 2006	Active	Unknown	DISTRITO NACIONAL
225	Ministerio de Deportes, Educación Física y Recreación	Purchases Below the Threshold	ordinary process	4736	5588.48	852.48	09 27 2018	09 28 2018	1	Closed	1774	Repuestos de Jesús, SRL	Goods	Female	Legal Person	09 15 2006	Active	Unknown	DISTRITO NACIONAL
225	Ministerio de Deportes, Educación Física y Recreación	Purchases Below the Threshold	ordinary process	1850	2124	274	10 12 2018	10 12 2018	0	Closed	1774	Repuestos de Jesús, SRL	Goods	Female	Legal Person	09 15 2006	Active	Unknown	DISTRITO NACIONAL
886	Comisión para la Readecuación de La Barquita y Entorno.	Purchases Below the Threshold	ordinary process	8130	8106.6	-23.4	10 18 2018	10 18 2018	0	Active	1774	Repuestos de Jesús, SRL	Goods	Female	Legal Person	09 15 2006	Active	Unknown	DISTRITO NACIONAL
178	Gabinete de Coordinación de Políticas Sociales	Purchases Below the Threshold	ordinary process	74715.54	6994.45	-67721.09	10 23 2018	10 23 2018	0	Closed	1774	Repuestos de Jesús, SRL	Services	Female	Legal Person	09 15 2006	Active	Unknown	DISTRITO NACIONAL
1020	Consejo de Coordinación de la Zona Especial de Desarrollo Fronterizo	Purchases Below the Threshold	ordinary process	16423	19379.14	2956.14	10 29 2018	10 29 2018	0	Active	1774	Repuestos de Jesús, SRL	Services	Female	Legal Person	09 15 2006	Active	Unknown	DISTRITO NACIONAL
199	Dirección de Inf. Analisis y Prog. Estratégica	Purchases Below the Threshold	ordinary process	17930	21157.4	3227.4	11 19 2018	11 19 2018	0	Active	1774	Repuestos de Jesús, SRL	Services	Female	Legal Person	09 15 2006	Active	Unknown	DISTRITO NACIONAL
207	Programa Supérate	Purchases Below the Threshold	ordinary process	25000	24372.9	-627.1	11 28 2018	12 5 2018	7	Closed	1774	Repuestos de Jesús, SRL	Services	Female	Legal Person	09 15 2006	Active	Unknown	DISTRITO NACIONAL
176	Instituto Nacional de Administración Pública	Purchases Below the Threshold	ordinary process	24555	28974.9	4419.9	11 29 2018	11 30 2018	1	Closed	1774	Repuestos de Jesús, SRL	Services	Female	Legal Person	09 15 2006	Active	Unknown	DISTRITO NACIONAL
175	Ministerio de Administración Pública	Minor Purchases	ordinary process	600000	88500	-511500	12 4 2018	12 13 2018	9	Cancelled	1774	Repuestos de Jesús, SRL	Unknown	Female	Legal Person	09 15 2006	Active	Unknown	DISTRITO NACIONAL
175	Ministerio de Administración Pública	Minor Purchases	ordinary process	600000	88500	-511500	12 4 2018	12 13 2018	9	Cancelled	1774	Repuestos de Jesús, SRL	Unknown	Female	Legal Person	09 15 2006	Active	Unknown	DISTRITO NACIONAL
178	Gabinete de Coordinación de Políticas Sociales	Purchases Below the Threshold	ordinary process	16250.96	16250.96	0	12 6 2018	12 6 2018	0	Closed	1774	Repuestos de Jesús, SRL	Services	Female	Legal Person	09 15 2006	Active	Unknown	DISTRITO NACIONAL
207	Programa Supérate	Purchases Below the Threshold	ordinary process	115300	112494.002	-2805.998	12 6 2018	12 10 2018	4	Closed	1774	Repuestos de Jesús, SRL	Services	Female	Legal Person	09 15 2006	Active	Unknown	DISTRITO NACIONAL
207	Programa Supérate	Purchases Below the Threshold	ordinary process	35000	34913.84	-86.16	12 7 2018	12 10 2018	3	Closed	1774	Repuestos de Jesús, SRL	Services	Female	Legal Person	09 15 2006	Active	Unknown	DISTRITO NACIONAL
180	Dirección General de Seguridad de Tránsito y Transporte Terrestre	Price Comparison	ordinary process	2542346.5	498053.22	-2044293.28	11 30 2018	12 26 2018	26	Closed	1774	Repuestos de Jesús, SRL	Goods	Female	Legal Person	09 15 2006	Active	Unknown	DISTRITO NACIONAL
180	Dirección General de Seguridad de Tránsito y Transporte Terrestre	Price Comparison	ordinary process	2542346.5	498053.22	-2044293.28	11 30 2018	12 19 2018	19	Cancelled	1774	Repuestos de Jesús, SRL	Goods	Female	Legal Person	09 15 2006	Active	Unknown	DISTRITO NACIONAL
180	Dirección General de Seguridad de Tránsito y Transporte Terrestre	Minor Purchases	ordinary process	672000	85550	-586450	12 24 2018	12 27 2018	3	Closed	1774	Repuestos de Jesús, SRL	Goods	Female	Legal Person	09 15 2006	Active	Unknown	DISTRITO NACIONAL
207	Programa Supérate	Purchases Below the Threshold	ordinary process	13000	12036	-964	12 28 2018	01 8 2019	11	Closed	1774	Repuestos de Jesús, SRL	Services	Female	Legal Person	09 15 2006	Active	Unknown	DISTRITO NACIONAL
207	Programa Supérate	Purchases Below the Threshold	ordinary process	107000	105417.66	-1582.34	01 4 2019	01 4 2019	0	Closed	1774	Repuestos de Jesús, SRL	Services	Female	Legal Person	09 15 2006	Active	Unknown	DISTRITO NACIONAL
207	Programa Supérate	Purchases Below the Threshold	ordinary process	55000	53175.0515	-1824.9485	01 4 2019	01 4 2019	0	Closed	1774	Repuestos de Jesús, SRL	Services	Female	Legal Person	09 15 2006	Active	Unknown	DISTRITO NACIONAL
207	Programa Supérate	Purchases Below the Threshold	ordinary process	79000	41960.8	-37039.2	01 7 2019	01 7 2019	0	Closed	1774	Repuestos de Jesús, SRL	Services	Female	Legal Person	09 15 2006	Active	Unknown	DISTRITO NACIONAL
207	Programa Supérate	Purchases Below the Threshold	ordinary process	79000	78956.16	-43.84	01 7 2019	01 7 2019	0	Cancelled	1774	Repuestos de Jesús, SRL	Services	Female	Legal Person	09 15 2006	Active	Unknown	DISTRITO NACIONAL
207	Programa Supérate	Purchases Below the Threshold	ordinary process	32000	30241.04	-1758.96	01 8 2019	01 8 2019	0	Closed	1774	Repuestos de Jesús, SRL	Services	Female	Legal Person	09 15 2006	Active	Unknown	DISTRITO NACIONAL
207	Programa Supérate	Purchases Below the Threshold	ordinary process	4350	4307	-43	01 9 2019	01 10 2019	1	Closed	1774	Repuestos de Jesús, SRL	Goods	Female	Legal Person	09 15 2006	Active	Unknown	DISTRITO NACIONAL
207	Programa Supérate	Purchases Below the Threshold	ordinary process	11000	10679	-321	01 14 2019	01 14 2019	0	Closed	1774	Repuestos de Jesús, SRL	Services	Female	Legal Person	09 15 2006	Active	Unknown	DISTRITO NACIONAL
207	Programa Supérate	Purchases Below the Threshold	ordinary process	80000	30616.28	-49383.72	01 30 2019	03 18 2019	47	Closed	1774	Repuestos de Jesús, SRL	Services	Female	Legal Person	09 15 2006	Active	Unknown	DISTRITO NACIONAL
1006	Mercados Dominicanos de Abasto Agropecuario	Purchases Below the Threshold	ordinary process	47295	48580.7888	1285.7888	02 14 2019	02 18 2019	4	Rescinded	1774	Repuestos de Jesús, SRL	Goods	Female	Legal Person	09 15 2006	Active	Unknown	DISTRITO NACIONAL
225	Ministerio de Deportes, Educación Física y Recreación	Purchases Below the Threshold	ordinary process	31153	36760.54	5607.54	02 14 2019	02 14 2019	0	Closed	1774	Repuestos de Jesús, SRL	Services	Female	Legal Person	09 15 2006	Active	Unknown	DISTRITO NACIONAL
1006	Mercados Dominicanos de Abasto Agropecuario	Purchases Below the Threshold	ordinary process	47295	48639.7888	1344.7888	02 18 2019	02 18 2019	0	Closed	1774	Repuestos de Jesús, SRL	Goods	Female	Legal Person	09 15 2006	Active	Unknown	DISTRITO NACIONAL
178	Gabinete de Coordinación de Políticas Sociales	Purchases Below the Threshold	ordinary process	6702.4	6702.4	0	03 5 2019	03 5 2019	0	Closed	1774	Repuestos de Jesús, SRL	Services	Female	Legal Person	09 15 2006	Active	Unknown	DISTRITO NACIONAL
199	Dirección de Inf. Analisis y Prog. Estratégica	Purchases Below the Threshold	ordinary process	18820	22207.6	3387.6	03 5 2019	03 6 2019	1	Closed	1774	Repuestos de Jesús, SRL	Services	Female	Legal Person	09 15 2006	Active	Unknown	DISTRITO NACIONAL
225	Ministerio de Deportes, Educación Física y Recreación	Purchases Below the Threshold	ordinary process	30797	36340.4954	5543.4954	03 14 2019	03 15 2019	1	Closed	1774	Repuestos de Jesús, SRL	Services	Female	Legal Person	09 15 2006	Active	Unknown	DISTRITO NACIONAL
207	Programa Supérate	Purchases Below the Threshold	ordinary process	118135	118031.5414	-103.4586	03 18 2019	03 19 2019	1	Cancelled	1774	Repuestos de Jesús, SRL	Services	Female	Legal Person	09 15 2006	Active	Unknown	DISTRITO NACIONAL
207	Programa Supérate	Purchases Below the Threshold	ordinary process	118135	128497.8535	10362.8535	03 18 2019	04 2 2019	15	Closed	1774	Repuestos de Jesús, SRL	Services	Female	Legal Person	09 15 2006	Active	Unknown	DISTRITO NACIONAL
207	Programa Supérate	Purchases Below the Threshold	ordinary process	19300	18207.4	-1092.6	03 27 2019	03 28 2019	1	Closed	1774	Repuestos de Jesús, SRL	Services	Female	Legal Person	09 15 2006	Active	Unknown	DISTRITO NACIONAL
175	Ministerio de Administración Pública	Minor Purchases	ordinary process	900000	88500	-811500	03 25 2019	03 28 2019	3	Closed	1774	Repuestos de Jesús, SRL	Services	Female	Legal Person	09 15 2006	Active	Unknown	DISTRITO NACIONAL
180	Dirección General de Seguridad de Tránsito y Transporte Terrestre	Minor Purchases	ordinary process	762711.86	899999.9948	137288.1348	03 26 2019	04 1 2019	6	Closed	1774	Repuestos de Jesús, SRL	Goods	Female	Legal Person	09 15 2006	Active	Unknown	DISTRITO NACIONAL
207	Programa Supérate	Purchases Below the Threshold	ordinary process	25000	22803.736	-2196.264	04 1 2019	04 1 2019	0	Closed	1774	Repuestos de Jesús, SRL	Services	Female	Legal Person	09 15 2006	Active	Unknown	DISTRITO NACIONAL
207	Programa Supérate	Purchases Below the Threshold	ordinary process	50000	18752.56	-31247.44	04 1 2019	04 2 2019	1	Closed	1774	Repuestos de Jesús, SRL	Services	Female	Legal Person	09 15 2006	Active	Unknown	DISTRITO NACIONAL
225	Ministerio de Deportes, Educación Física y Recreación	Purchases Below the Threshold	ordinary process	7775	9174.5	1399.5	04 8 2019	04 9 2019	1	Closed	1774	Repuestos de Jesús, SRL	Services	Female	Legal Person	09 15 2006	Active	Unknown	DISTRITO NACIONAL
207	Programa Supérate	Purchases Below the Threshold	ordinary process	69659.4	82198.092	12538.692	04 11 2019	04 15 2019	4	Closed	1774	Repuestos de Jesús, SRL	Services	Female	Legal Person	09 15 2006	Active	Unknown	DISTRITO NACIONAL
207	Programa Supérate	Purchases Below the Threshold	ordinary process	90000	82755.76	-7244.24	04 17 2019	04 24 2019	7	Closed	1774	Repuestos de Jesús, SRL	Services	Female	Legal Person	09 15 2006	Active	Unknown	DISTRITO NACIONAL
688	Jardín Botánico Nacional	Purchases Below the Threshold	ordinary process	34837.41	34037.395	-800.015	04 22 2019	04 24 2019	2	Closed	1774	Repuestos de Jesús, SRL	Goods	Female	Legal Person	09 15 2006	Active	Unknown	DISTRITO NACIONAL
176	Instituto Nacional de Administración Pública	Purchases Below the Threshold	ordinary process	15935	18803.3	2868.3	04 24 2019	04 25 2019	1	Closed	1774	Repuestos de Jesús, SRL	Services	Female	Legal Person	09 15 2006	Active	Unknown	DISTRITO NACIONAL
207	Programa Supérate	Purchases Below the Threshold	ordinary process	110778.4	5245.1	-105533.3	04 24 2019	04 25 2019	1	Closed	1774	Repuestos de Jesús, SRL	Services	Female	Legal Person	09 15 2006	Active	Unknown	DISTRITO NACIONAL
207	Programa Supérate	Purchases Below the Threshold	ordinary process	21724.45	21724.449	-0.001	05 7 2019	05 7 2019	0	Closed	1774	Repuestos de Jesús, SRL	Services	Female	Legal Person	09 15 2006	Active	Unknown	DISTRITO NACIONAL
207	Programa Supérate	Purchases Below the Threshold	ordinary process	79266.5	6991.5	-72275	05 14 2019	05 14 2019	0	Closed	1774	Repuestos de Jesús, SRL	Services	Female	Legal Person	09 15 2006	Active	Unknown	DISTRITO NACIONAL
225	Ministerio de Deportes, Educación Física y Recreación	Purchases Below the Threshold	ordinary process	20789	24531.02	3742.02	05 16 2019	05 16 2019	0	Closed	1774	Repuestos de Jesús, SRL	Services	Female	Legal Person	09 15 2006	Active	Unknown	DISTRITO NACIONAL
207	Programa Supérate	Purchases Below the Threshold	ordinary process	84152.74	84152.703	-0.037	05 17 2019	05 17 2019	0	Closed	1774	Repuestos de Jesús, SRL	Services	Female	Legal Person	09 15 2006	Active	Unknown	DISTRITO NACIONAL
225	Ministerio de Deportes, Educación Física y Recreación	Purchases Below the Threshold	ordinary process	9727	11477.86	1750.86	05 20 2019	05 21 2019	1	Active	1774	Repuestos de Jesús, SRL	Services	Female	Legal Person	09 15 2006	Active	Unknown	DISTRITO NACIONAL
225	Ministerio de Deportes, Educación Física y Recreación	Purchases Below the Threshold	ordinary process	20917	24682.06	3765.06	05 21 2019	05 21 2019	0	Closed	1774	Repuestos de Jesús, SRL	Services	Female	Legal Person	09 15 2006	Active	Unknown	DISTRITO NACIONAL
207	Programa Supérate	Purchases Below the Threshold	ordinary process	30000	22656	-7344	05 21 2019	05 27 2019	6	Closed	1774	Repuestos de Jesús, SRL	Goods	Female	Legal Person	09 15 2006	Active	Unknown	DISTRITO NACIONAL
225	Ministerio de Deportes, Educación Física y Recreación	Purchases Below the Threshold	ordinary process	25124	29646.32	4522.32	05 22 2019	05 23 2019	1	Closed	1774	Repuestos de Jesús, SRL	Services	Female	Legal Person	09 15 2006	Active	Unknown	DISTRITO NACIONAL
207	Programa Supérate	Purchases Below the Threshold	ordinary process	100614.6	118725.228	18110.628	05 27 2019	05 27 2019	0	Closed	1774	Repuestos de Jesús, SRL	Services	Female	Legal Person	09 15 2006	Active	Unknown	DISTRITO NACIONAL
207	Programa Supérate	Purchases Below the Threshold	ordinary process	26215.59	26215.588	-0.002	05 29 2019	05 29 2019	0	Closed	1774	Repuestos de Jesús, SRL	Services	Female	Legal Person	09 15 2006	Active	Unknown	DISTRITO NACIONAL
889	Consejo Nac Reglamentación y Fomento Industria Lechera	Purchases Below the Threshold	ordinary process	6000	5593.2	-406.8	05 29 2019	05 30 2019	1	Active	1774	Repuestos de Jesús, SRL	Services	Female	Legal Person	09 15 2006	Active	Unknown	DISTRITO NACIONAL
207	Programa Supérate	Purchases Below the Threshold	ordinary process	83468.13	83468.126	-0.004	05 29 2019	05 29 2019	0	Closed	1774	Repuestos de Jesús, SRL	Services	Female	Legal Person	09 15 2006	Active	Unknown	DISTRITO NACIONAL
1043	Vicepresidencia de la República Dominicana	Purchases Below the Threshold	ordinary process	90000	84028.39	-5971.61	06 4 2019	06 4 2019	0	Closed	1774	Repuestos de Jesús, SRL	Services	Female	Legal Person	09 15 2006	Active	Unknown	DISTRITO NACIONAL
207	Programa Supérate	Purchases Below the Threshold	ordinary process	111002.62	130983.0916	19980.4716	06 6 2019	06 6 2019	0	Closed	1774	Repuestos de Jesús, SRL	Services	Female	Legal Person	09 15 2006	Active	Unknown	DISTRITO NACIONAL
207	Programa Supérate	Purchases Below the Threshold	ordinary process	115270	126224.6	10954.6	06 6 2019	06 7 2019	1	Closed	1774	Repuestos de Jesús, SRL	Services	Female	Legal Person	09 15 2006	Active	Unknown	DISTRITO NACIONAL
207	Programa Supérate	Purchases Below the Threshold	ordinary process	114042.08	22136.8	-91905.28	06 6 2019	06 7 2019	1	Closed	1774	Repuestos de Jesús, SRL	Services	Female	Legal Person	09 15 2006	Active	Unknown	DISTRITO NACIONAL
207	Programa Supérate	Purchases Below the Threshold	ordinary process	74231.77	29992.768	-44239.002	06 7 2019	06 7 2019	0	Closed	1774	Repuestos de Jesús, SRL	Services	Female	Legal Person	09 15 2006	Active	Unknown	DISTRITO NACIONAL
199	Dirección de Inf. Analisis y Prog. Estratégica	Purchases Below the Threshold	ordinary process	3800	3622.6	-177.4	06 12 2019	06 12 2019	0	Closed	1774	Repuestos de Jesús, SRL	Services	Female	Legal Person	09 15 2006	Active	Unknown	DISTRITO NACIONAL
207	Programa Supérate	Purchases Below the Threshold	ordinary process	58115.71	58115.708	-0.002	06 17 2019	06 17 2019	0	Closed	1774	Repuestos de Jesús, SRL	Services	Female	Legal Person	09 15 2006	Active	Unknown	DISTRITO NACIONAL
1043	Vicepresidencia de la República Dominicana	Purchases Below the Threshold	ordinary process	70000	62284.766	-7715.234	06 17 2019	06 17 2019	0	Closed	1774	Repuestos de Jesús, SRL	Services	Female	Legal Person	09 15 2006	Active	Unknown	DISTRITO NACIONAL
207	Programa Supérate	Purchases Below the Threshold	ordinary process	94451.8	74979.442	-19472.358	06 24 2019	06 24 2019	0	Closed	1774	Repuestos de Jesús, SRL	Services	Female	Legal Person	09 15 2006	Active	Unknown	DISTRITO NACIONAL
207	Programa Supérate	Purchases Below the Threshold	ordinary process	92000	61626.68	-30373.32	06 25 2019	06 26 2019	1	Closed	1774	Repuestos de Jesús, SRL	Services	Female	Legal Person	09 15 2006	Active	Unknown	DISTRITO NACIONAL
207	Programa Supérate	Purchases Below the Threshold	ordinary process	65589.29	38959.588	-26629.702	07 2 2019	07 2 2019	0	Active	1774	Repuestos de Jesús, SRL	Services	Female	Legal Person	09 15 2006	Active	Unknown	DISTRITO NACIONAL
866	Comision de Defensa Comercial	Purchases Below the Threshold	ordinary process	11000	10885.1814	-114.8186	07 2 2019	07 4 2019	2	Closed	1774	Repuestos de Jesús, SRL	Services	Female	Legal Person	09 15 2006	Active	Unknown	DISTRITO NACIONAL
207	Programa Supérate	Purchases Below the Threshold	ordinary process	123652.12	21240	-102412.12	07 2 2019	07 2 2019	0	Active	1774	Repuestos de Jesús, SRL	Services	Female	Legal Person	09 15 2006	Active	Unknown	DISTRITO NACIONAL
207	Programa Supérate	Purchases Below the Threshold	ordinary process	91395.48	91395.484	0.004	07 8 2019	07 8 2019	0	Active	1774	Repuestos de Jesús, SRL	Services	Female	Legal Person	09 15 2006	Active	Unknown	DISTRITO NACIONAL
207	Programa Supérate	Purchases Below the Threshold	ordinary process	31635.8	31635.8	0	07 17 2019	07 17 2019	0	Active	1774	Repuestos de Jesús, SRL	Services	Female	Legal Person	09 15 2006	Active	Unknown	DISTRITO NACIONAL
180	Dirección General de Seguridad de Tránsito y Transporte Terrestre	Price Comparison	ordinary process	1525214.02	781731.828	-743482.192	07 9 2019	07 25 2019	16	Active	1774	Repuestos de Jesús, SRL	Goods	Female	Legal Person	09 15 2006	Active	Unknown	DISTRITO NACIONAL
207	Programa Supérate	Purchases Below the Threshold	ordinary process	80760.38	80760.38	0	07 23 2019	07 23 2019	0	Active	1774	Repuestos de Jesús, SRL	Services	Female	Legal Person	09 15 2006	Active	Unknown	DISTRITO NACIONAL
207	Programa Supérate	Purchases Below the Threshold	ordinary process	83262.15	61183	-22079.15	07 29 2019	07 29 2019	0	Active	1774	Repuestos de Jesús, SRL	Services	Female	Legal Person	09 15 2006	Active	Unknown	DISTRITO NACIONAL
178	Gabinete de Coordinación de Políticas Sociales	Purchases Below the Threshold	ordinary process	3327.6	3327.6	0	07 31 2019	07 31 2019	0	Closed	1774	Repuestos de Jesús, SRL	Services	Female	Legal Person	09 15 2006	Active	Unknown	DISTRITO NACIONAL
207	Programa Supérate	Purchases Below the Threshold	ordinary process	55698.7	5103.5	-50595.2	08 19 2019	08 19 2019	0	Active	1774	Repuestos de Jesús, SRL	Services	Female	Legal Person	09 15 2006	Active	Unknown	DISTRITO NACIONAL
866	Comision de Defensa Comercial	Purchases Below the Threshold	ordinary process	8110	8324.9	214.9	09 4 2019	09 4 2019	0	Closed	1774	Repuestos de Jesús, SRL	Services	Female	Legal Person	09 15 2006	Active	Unknown	DISTRITO NACIONAL
225	Ministerio de Deportes, Educación Física y Recreación	Purchases Below the Threshold	ordinary process	22230.5	26231.99	4001.49	09 10 2019	09 10 2019	0	Closed	1774	Repuestos de Jesús, SRL	Services	Female	Legal Person	09 15 2006	Active	Unknown	DISTRITO NACIONAL
207	Programa Supérate	Purchases Below the Threshold	ordinary process	72038.23	43033.833	-29004.397	09 12 2019	09 12 2019	0	Active	1774	Repuestos de Jesús, SRL	Services	Female	Legal Person	09 15 2006	Active	Unknown	DISTRITO NACIONAL
175	Ministerio de Administración Pública	Minor Purchases	ordinary process	900000	106200	-793800	09 5 2019	09 17 2019	12	Closed	1774	Repuestos de Jesús, SRL	Services	Female	Legal Person	09 15 2006	Active	Unknown	DISTRITO NACIONAL
842	MUSEO HISTORIA NATURAL	Purchases Below the Threshold	ordinary process	1375	1622.5	247.5	10 15 2019	10 16 2019	1	Closed	1774	Repuestos de Jesús, SRL	Services	Female	Legal Person	09 15 2006	Active	Unknown	DISTRITO NACIONAL
225	Ministerio de Deportes, Educación Física y Recreación	Purchases Below the Threshold	ordinary process	7737	9129.66	1392.66	10 17 2019	10 17 2019	0	Active	1774	Repuestos de Jesús, SRL	Services	Female	Legal Person	09 15 2006	Active	Unknown	DISTRITO NACIONAL
225	Ministerio de Deportes, Educación Física y Recreación	Purchases Below the Threshold	ordinary process	2750	3245	495	10 24 2019	10 24 2019	0	Active	1774	Repuestos de Jesús, SRL	Goods	Female	Legal Person	09 15 2006	Active	Unknown	DISTRITO NACIONAL
725	Consejo Nacional de Competitividad	Purchases Below the Threshold	ordinary process	29500	29009.9814	-490.0186	11 6 2019	11 7 2019	1	Closed	1774	Repuestos de Jesús, SRL	Services	Female	Legal Person	09 15 2006	Active	Unknown	DISTRITO NACIONAL
178	Gabinete de Coordinación de Políticas Sociales	Purchases Below the Threshold	ordinary process	19836.98	19836.98	0	11 6 2019	11 7 2019	1	Closed	1774	Repuestos de Jesús, SRL	Goods	Female	Legal Person	09 15 2006	Active	Unknown	DISTRITO NACIONAL
176	Instituto Nacional de Administración Pública	Purchases Below the Threshold	ordinary process	5355	6318.9	963.9	11 12 2019	11 12 2019	0	Closed	1774	Repuestos de Jesús, SRL	Services	Female	Legal Person	09 15 2006	Active	Unknown	DISTRITO NACIONAL
225	Ministerio de Deportes, Educación Física y Recreación	Purchases Below the Threshold	ordinary process	3630	4283.4	653.4	11 15 2019	11 15 2019	0	Closed	1774	Repuestos de Jesús, SRL	Services	Female	Legal Person	09 15 2006	Active	Unknown	DISTRITO NACIONAL
842	MUSEO HISTORIA NATURAL	Purchases Below the Threshold	ordinary process	2360	2784.8	424.8	11 21 2019	11 21 2019	0	Closed	1774	Repuestos de Jesús, SRL	Goods	Female	Legal Person	09 15 2006	Active	Unknown	DISTRITO NACIONAL
207	Programa Supérate	Purchases Below the Threshold	ordinary process	15000	9820.373	-5179.627	12 2 2019	12 2 2019	0	Closed	1774	Repuestos de Jesús, SRL	Services	Female	Legal Person	09 15 2006	Active	Unknown	DISTRITO NACIONAL
1043	Vicepresidencia de la República Dominicana	Purchases Below the Threshold	ordinary process	75000	70735.7018	-4264.2982	12 4 2019	12 4 2019	0	Closed	1774	Repuestos de Jesús, SRL	Services	Female	Legal Person	09 15 2006	Active	Unknown	DISTRITO NACIONAL
1043	Vicepresidencia de la República Dominicana	Purchases Below the Threshold	ordinary process	75000	59945.51	-15054.49	12 4 2019	12 4 2019	0	Cancelled	1774	Repuestos de Jesús, SRL	Unknown	Female	Legal Person	09 15 2006	Active	Unknown	DISTRITO NACIONAL
1043	Vicepresidencia de la República Dominicana	Purchases Below the Threshold	ordinary process	71000	70752.5758	-247.4242	12 10 2019	12 10 2019	0	Closed	1774	Repuestos de Jesús, SRL	Services	Female	Legal Person	09 15 2006	Active	Unknown	DISTRITO NACIONAL
866	Comision de Defensa Comercial	Purchases Below the Threshold	ordinary process	10000	10612.92	612.92	12 11 2019	12 12 2019	1	Closed	1774	Repuestos de Jesús, SRL	Services	Female	Legal Person	09 15 2006	Active	Unknown	DISTRITO NACIONAL
981	Instituto Geográfico Nacional José Joaquín Hungría Morel	Purchases Below the Threshold	ordinary process	6000	5032.7	-967.3	12 12 2019	12 12 2019	0	Closed	1774	Repuestos de Jesús, SRL	Services	Female	Legal Person	09 15 2006	Active	Unknown	DISTRITO NACIONAL
175	Ministerio de Administración Pública	Minor Purchases	ordinary process	900001	49999.9984	-850001.0016	12 12 2019	12 19 2019	7	Active	1774	Repuestos de Jesús, SRL	Services	Female	Legal Person	09 15 2006	Active	Unknown	DISTRITO NACIONAL
180	Dirección General de Seguridad de Tránsito y Transporte Terrestre	Price Comparison	ordinary process	3220244.8	1390495.244	-1829749.556	12 10 2019	12 23 2019	13	Active	1774	Repuestos de Jesús, SRL	Goods	Female	Legal Person	09 15 2006	Active	Unknown	DISTRITO NACIONAL
225	Ministerio de Deportes, Educación Física y Recreación	Purchases Below the Threshold	ordinary process	7217	8516.06	1299.06	12 24 2019	12 26 2019	2	Closed	1774	Repuestos de Jesús, SRL	Services	Female	Legal Person	09 15 2006	Active	Unknown	DISTRITO NACIONAL
180	Dirección General de Seguridad de Tránsito y Transporte Terrestre	Price Comparison	ordinary process	3305039	3899946.02	594907.02	12 16 2019	12 28 2019	12	Active	1774	Repuestos de Jesús, SRL	Goods	Female	Legal Person	09 15 2006	Active	Unknown	DISTRITO NACIONAL
180	Dirección General de Seguridad de Tránsito y Transporte Terrestre	Price Comparison	ordinary process	3643969.85	1481355.244	-2162614.606	02 12 2020	02 26 2020	14	Closed	1774	Repuestos de Jesús, SRL	Services	Female	Legal Person	09 15 2006	Active	Unknown	DISTRITO NACIONAL
225	Ministerio de Deportes, Educación Física y Recreación	Purchases Below the Threshold	ordinary process	4755	5610.9	855.9	03 5 2020	03 5 2020	0	Closed	1774	Repuestos de Jesús, SRL	Services	Female	Legal Person	09 15 2006	Active	Unknown	DISTRITO NACIONAL
225	Ministerio de Deportes, Educación Física y Recreación	Purchases Below the Threshold	ordinary process	7810	9215.8	1405.8	03 6 2020	03 9 2020	3	Closed	1774	Repuestos de Jesús, SRL	Goods	Female	Legal Person	09 15 2006	Active	Unknown	DISTRITO NACIONAL
225	Ministerio de Deportes, Educación Física y Recreación	Purchases Below the Threshold	ordinary process	3875	4572.5	697.5	03 6 2020	03 9 2020	3	Rescinded	1774	Repuestos de Jesús, SRL	Goods	Female	Legal Person	09 15 2006	Active	Unknown	DISTRITO NACIONAL
225	Ministerio de Deportes, Educación Física y Recreación	Purchases Below the Threshold	ordinary process	82080.25	96854.695	14774.445	03 10 2020	03 10 2020	0	Closed	1774	Repuestos de Jesús, SRL	Services	Female	Legal Person	09 15 2006	Active	Unknown	DISTRITO NACIONAL
225	Ministerio de Deportes, Educación Física y Recreación	Purchases Below the Threshold	ordinary process	19672	23212.96	3540.96	03 13 2020	03 16 2020	3	Closed	1774	Repuestos de Jesús, SRL	Services	Female	Legal Person	09 15 2006	Active	Unknown	DISTRITO NACIONAL
225	Ministerio de Deportes, Educación Física y Recreación	Purchases Below the Threshold	ordinary process	12861.2	15176.216	2315.016	03 20 2020	03 20 2020	0	Closed	1774	Repuestos de Jesús, SRL	Goods	Female	Legal Person	09 15 2006	Active	Unknown	DISTRITO NACIONAL
199	Dirección de Inf. Analisis y Prog. Estratégica	Purchases Below the Threshold	ordinary process	9000	8909	-91	06 15 2020	06 15 2020	0	Closed	1774	Repuestos de Jesús, SRL	Services	Female	Legal Person	09 15 2006	Active	Unknown	DISTRITO NACIONAL
866	Comision de Defensa Comercial	Purchases Below the Threshold	ordinary process	10000	9527.32	-472.68	06 19 2020	06 19 2020	0	Closed	1774	Repuestos de Jesús, SRL	Services	Female	Legal Person	09 15 2006	Active	Unknown	DISTRITO NACIONAL
225	Ministerio de Deportes, Educación Física y Recreación	Purchases Below the Threshold	ordinary process	12977	15312.86	2335.86	06 30 2020	06 30 2020	0	Closed	1774	Repuestos de Jesús, SRL	Services	Female	Legal Person	09 15 2006	Active	Unknown	DISTRITO NACIONAL
1043	Vicepresidencia de la República Dominicana	Purchases Below the Threshold	ordinary process	80000	87023.94	7023.94	07 7 2020	07 7 2020	0	Closed	1774	Repuestos de Jesús, SRL	Services	Female	Legal Person	09 15 2006	Active	Unknown	DISTRITO NACIONAL
225	Ministerio de Deportes, Educación Física y Recreación	Purchases Below the Threshold	ordinary process	10112	11932.16	1820.16	07 15 2020	07 15 2020	0	Closed	1774	Repuestos de Jesús, SRL	Services	Female	Legal Person	09 15 2006	Active	Unknown	DISTRITO NACIONAL
180	Dirección General de Seguridad de Tránsito y Transporte Terrestre	Price Comparison	ordinary process	3627593.8	522499.04	-3105094.76	07 14 2020	07 27 2020	13	Closed	1774	Repuestos de Jesús, SRL	Services	Female	Legal Person	09 15 2006	Active	Unknown	DISTRITO NACIONAL
1043	Vicepresidencia de la República Dominicana	Purchases Below the Threshold	ordinary process	20000	14590.7	-5409.3	07 30 2020	07 30 2020	0	Active	1774	Repuestos de Jesús, SRL	Services	Female	Legal Person	09 15 2006	Active	Unknown	DISTRITO NACIONAL
981	Instituto Geográfico Nacional José Joaquín Hungría Morel	Purchases Below the Threshold	ordinary process	20000	18297.08	-1702.92	09 15 2020	09 15 2020	0	Closed	1774	Repuestos de Jesús, SRL	Services	Female	Legal Person	09 15 2006	Active	Unknown	DISTRITO NACIONAL
176	Instituto Nacional de Administración Pública	Purchases Below the Threshold	ordinary process	14828.5	17497.63	2669.13	10 8 2020	10 8 2020	0	Closed	1774	Repuestos de Jesús, SRL	Goods	Female	Legal Person	09 15 2006	Active	Unknown	DISTRITO NACIONAL
201	Dirección General de Desarrollo Fronterizo	Purchases Below the Threshold	ordinary process	10400	10417.04	17.04	10 20 2020	10 20 2020	0	Closed	1774	Repuestos de Jesús, SRL	Services	Female	Legal Person	09 15 2006	Active	Unknown	DISTRITO NACIONAL
225	Ministerio de Deportes, Educación Física y Recreación	Purchases Below the Threshold	ordinary process	4561.88	4561.88	0	10 26 2020	10 26 2020	0	Closed	1774	Repuestos de Jesús, SRL	Services	Female	Legal Person	09 15 2006	Active	Unknown	DISTRITO NACIONAL
842	MUSEO HISTORIA NATURAL	Purchases Below the Threshold	ordinary process	1600	1888	288	11 6 2020	11 6 2020	0	Closed	1774	Repuestos de Jesús, SRL	Goods	Female	Legal Person	09 15 2006	Active	Unknown	DISTRITO NACIONAL
225	Ministerio de Deportes, Educación Física y Recreación	Minor Purchases	ordinary process	930000	17583.18	-912416.82	11 11 2020	11 16 2020	5	Closed	1774	Repuestos de Jesús, SRL	Services	Female	Legal Person	09 15 2006	Active	Unknown	DISTRITO NACIONAL
831	Comisión Nacional de Defensa de la Competencia	Purchases Below the Threshold	ordinary process	6000	5664	-336	12 7 2020	12 8 2020	1	Closed	1774	Repuestos de Jesús, SRL	Goods	Female	Legal Person	09 15 2006	Active	Unknown	DISTRITO NACIONAL
866	Comision de Defensa Comercial	Purchases Below the Threshold	ordinary process	14600	14549.4	-50.6	12 9 2020	12 9 2020	0	Active	1774	Repuestos de Jesús, SRL	Services	Female	Legal Person	09 15 2006	Active	Unknown	DISTRITO NACIONAL
210	Consejo Nacional de la Persona Envejeciente	Purchases Below the Threshold	ordinary process	17200	15340	-1860	12 10 2020	12 10 2020	0	Rescinded	1774	Repuestos de Jesús, SRL	Goods	Female	Legal Person	09 15 2006	Active	Unknown	DISTRITO NACIONAL
1043	Vicepresidencia de la República Dominicana	Purchases Below the Threshold	ordinary process	45000	35205.3	-9794.7	12 16 2020	12 16 2020	0	Closed	1774	Repuestos de Jesús, SRL	Services	Female	Legal Person	09 15 2006	Active	Unknown	DISTRITO NACIONAL
1043	Vicepresidencia de la República Dominicana	Purchases Below the Threshold	ordinary process	54000	52911.2	-1088.8	12 18 2020	12 18 2020	0	Closed	1774	Repuestos de Jesús, SRL	Services	Female	Legal Person	09 15 2006	Active	Unknown	DISTRITO NACIONAL
842	MUSEO HISTORIA NATURAL	Purchases Below the Threshold	ordinary process	3350	3953	603	12 18 2020	12 18 2020	0	Closed	1774	Repuestos de Jesús, SRL	Goods	Female	Legal Person	09 15 2006	Active	Unknown	DISTRITO NACIONAL
1043	Vicepresidencia de la República Dominicana	Purchases Below the Threshold	ordinary process	96000	95538	-462	12 21 2020	12 21 2020	0	Closed	1774	Repuestos de Jesús, SRL	Services	Female	Legal Person	09 15 2006	Active	Unknown	DISTRITO NACIONAL
176	Instituto Nacional de Administración Pública	Purchases Below the Threshold	ordinary process	10555	12454.9	1899.9	02 25 2021	03 2 2021	5	Closed	1774	Repuestos de Jesús, SRL	Services	Female	Legal Person	09 15 2006	Active	Unknown	DISTRITO NACIONAL
688	Jardín Botánico Nacional	Purchases Below the Threshold	ordinary process	48500.12	61929.47	13429.35	03 23 2021	03 25 2021	2	Closed	1774	Repuestos de Jesús, SRL	Goods	Female	Legal Person	09 15 2006	Active	Unknown	DISTRITO NACIONAL
866	Comision de Defensa Comercial	Purchases Below the Threshold	ordinary process	14000	11410.25	-2589.75	04 7 2021	04 7 2021	0	Closed	1774	Repuestos de Jesús, SRL	Services	Female	Legal Person	09 15 2006	Active	Unknown	DISTRITO NACIONAL
842	MUSEO HISTORIA NATURAL	Purchases Below the Threshold	ordinary process	11844.2	13976.16	2131.96	04 27 2021	04 27 2021	0	Closed	1774	Repuestos de Jesús, SRL	Services	Female	Legal Person	09 15 2006	Active	Unknown	DISTRITO NACIONAL
889	Consejo Nac Reglamentación y Fomento Industria Lechera	Purchases Below the Threshold	ordinary process	8694.5	10259.51	1565.01	05 18 2021	05 18 2021	0	Active	1774	Repuestos de Jesús, SRL	Goods	Female	Legal Person	09 15 2006	Active	Unknown	DISTRITO NACIONAL
711	Administradora de Riesgos de Salud para los Maestros	Purchases Below the Threshold	ordinary process	7702.45	7702.45	0	05 25 2021	05 31 2021	6	Active	1774	Repuestos de Jesús, SRL	Goods	Female	Legal Person	09 15 2006	Active	Unknown	DISTRITO NACIONAL
1043	Vicepresidencia de la República Dominicana	Purchases Below the Threshold	ordinary process	127000	126751.84	-248.16	06 11 2021	06 11 2021	0	Closed	1774	Repuestos de Jesús, SRL	Unknown	Female	Legal Person	09 15 2006	Active	Unknown	DISTRITO NACIONAL
176	Instituto Nacional de Administración Pública	Purchases Below the Threshold	ordinary process	7015	8277.7	1262.7	06 18 2021	06 21 2021	3	Closed	1774	Repuestos de Jesús, SRL	Services	Female	Legal Person	09 15 2006	Active	Unknown	DISTRITO NACIONAL
842	MUSEO HISTORIA NATURAL	Purchases Below the Threshold	ordinary process	2390	2820.2	430.2	06 22 2021	06 22 2021	0	Closed	1774	Repuestos de Jesús, SRL	Goods	Female	Legal Person	09 15 2006	Active	Unknown	DISTRITO NACIONAL
210	Consejo Nacional de la Persona Envejeciente	Purchases Below the Threshold	ordinary process	12800	8496	-4304	06 28 2021	06 29 2021	1	Closed	1774	Repuestos de Jesús, SRL	Goods	Female	Legal Person	09 15 2006	Active	Unknown	DISTRITO NACIONAL
1006	Mercados Dominicanos de Abasto Agropecuario	Purchases Below the Threshold	ordinary process	17345	15065.65	-2279.35	06 29 2021	07 5 2021	6	Active	1774	Repuestos de Jesús, SRL	Goods	Female	Legal Person	09 15 2006	Active	Unknown	DISTRITO NACIONAL
1006	Mercados Dominicanos de Abasto Agropecuario	Purchases Below the Threshold	ordinary process	17650	16901.14	-748.86	06 29 2021	07 5 2021	6	Active	1774	Repuestos de Jesús, SRL	Goods	Female	Legal Person	09 15 2006	Active	Unknown	DISTRITO NACIONAL
1006	Mercados Dominicanos de Abasto Agropecuario	Purchases Below the Threshold	ordinary process	63150	54787.4	-8362.6	07 6 2021	07 7 2021	1	Active	1774	Repuestos de Jesús, SRL	Goods	Female	Legal Person	09 15 2006	Active	Unknown	DISTRITO NACIONAL
988	Servicio Regional de Salud Metropolitano	Purchases Below the Threshold	ordinary process	7640.5	7434	-206.5	05 13 2022	05 24 2022	11	Closed	1774	Repuestos de Jesús, SRL	Goods	Female	Legal Person	09 15 2006	Active	Unknown	DISTRITO NACIONAL
842	MUSEO HISTORIA NATURAL	Purchases Below the Threshold	ordinary process	9364.5	11050.11	1685.61	05 23 2022	05 23 2022	0	Closed	1774	Repuestos de Jesús, SRL	Services	Female	Legal Person	09 15 2006	Active	Unknown	DISTRITO NACIONAL
889	Consejo Nac Reglamentación y Fomento Industria Lechera	Purchases Below the Threshold	ordinary process	19095.2	22532.34	3437.14	05 27 2022	05 27 2022	0	Active	1774	Repuestos de Jesús, SRL	Goods	Female	Legal Person	09 15 2006	Active	Unknown	DISTRITO NACIONAL
178	Gabinete de Coordinación de Políticas Sociales	Purchases Below the Threshold	ordinary process	8219.29	8219.29	0	05 31 2022	05 31 2022	0	Closed	1774	Repuestos de Jesús, SRL	Services	Female	Legal Person	09 15 2006	Active	Unknown	DISTRITO NACIONAL
1006	Mercados Dominicanos de Abasto Agropecuario	Purchases Below the Threshold	ordinary process	86010	85278.6	-731.4	06 8 2022	06 8 2022	0	In edition	1774	Repuestos de Jesús, SRL	Goods	Female	Legal Person	09 15 2006	Active	Unknown	DISTRITO NACIONAL
178	Gabinete de Coordinación de Políticas Sociales	Purchases Below the Threshold	ordinary process	3363	3363	0	06 17 2022	06 17 2022	0	Active	1774	Repuestos de Jesús, SRL	Goods	Female	Legal Person	09 15 2006	Active	Unknown	DISTRITO NACIONAL
178	Gabinete de Coordinación de Políticas Sociales	Purchases Below the Threshold	ordinary process	2684.5	2684.5	0	06 22 2022	06 23 2022	1	Active	1774	Repuestos de Jesús, SRL	Services	Female	Legal Person	09 15 2006	Active	Unknown	DISTRITO NACIONAL
178	Gabinete de Coordinación de Políticas Sociales	Purchases Below the Threshold	ordinary process	12577.62	12577.62	0	07 8 2022	07 8 2022	0	Active	1774	Repuestos de Jesús, SRL	Services	Female	Legal Person	09 15 2006	Active	Unknown	DISTRITO NACIONAL
1043	Vicepresidencia de la República Dominicana	Purchases Below the Threshold	ordinary process	112341.9	101155.5	-11186.4	07 15 2022	07 15 2022	0	Closed	1774	Repuestos de Jesús, SRL	Goods	Female	Legal Person	09 15 2006	Active	Unknown	DISTRITO NACIONAL
1043	Vicepresidencia de la República Dominicana	Minor Purchases	ordinary process	1200000	300000	-900000	07 18 2022	07 26 2022	8	Active	1774	Repuestos de Jesús, SRL	Services	Female	Legal Person	09 15 2006	Active	Unknown	DISTRITO NACIONAL
988	Servicio Regional de Salud Metropolitano	Minor Purchases	ordinary process	300000	278165.24	-21834.76	07 19 2022	08 3 2022	15	Closed	1774	Repuestos de Jesús, SRL	Services	Female	Legal Person	09 15 2006	Active	Unknown	DISTRITO NACIONAL
176	Instituto Nacional de Administración Pública	Purchases Below the Threshold	ordinary process	11505	11505	0	08 11 2022	08 11 2022	0	Closed	1774	Repuestos de Jesús, SRL	Goods	Female	Legal Person	09 15 2006	Active	Unknown	DISTRITO NACIONAL
176	Instituto Nacional de Administración Pública	Purchases Below the Threshold	ordinary process	11505	11505	0	08 24 2022	08 25 2022	1	Closed	1774	Repuestos de Jesús, SRL	Goods	Female	Legal Person	09 15 2006	Active	Unknown	DISTRITO NACIONAL
886	Comisión para la Readecuación de La Barquita y Entorno.	Purchases Below the Threshold	ordinary process	16000	15180.7	-819.3	09 2 2022	09 2 2022	0	Closed	1774	Repuestos de Jesús, SRL	Goods	Female	Legal Person	09 15 2006	Active	Unknown	DISTRITO NACIONAL
253	DIRECCION GENERAL DE MINERIA	Purchases Below the Threshold	ordinary process	144000	9115.5	-134884.5	09 9 2022	09 20 2022	11	Closed	1774	Repuestos de Jesús, SRL	Goods	Female	Legal Person	09 15 2006	Active	Unknown	DISTRITO NACIONAL
253	DIRECCION GENERAL DE MINERIA	Purchases Below the Threshold	ordinary process	24600	26786	2186	09 26 2022	09 27 2022	1	Closed	1774	Repuestos de Jesús, SRL	Goods	Female	Legal Person	09 15 2006	Active	Unknown	DISTRITO NACIONAL
253	DIRECCION GENERAL DE MINERIA	Purchases Below the Threshold	ordinary process	68000	2301	-65699	02 15 2023	02 22 2023	7	Closed	1774	Repuestos de Jesús, SRL	Goods	Female	Legal Person	09 15 2006	Active	Unknown	DISTRITO NACIONAL
842	MUSEO HISTORIA NATURAL	Purchases Below the Threshold	ordinary process	5982.6	5982.6	0	02 22 2023	02 22 2023	0	Closed	1774	Repuestos de Jesús, SRL	Services	Female	Legal Person	09 15 2006	Active	Unknown	DISTRITO NACIONAL
988	Servicio Regional de Salud Metropolitano	Purchases Below the Threshold	ordinary process	200000	192051.17	-7948.83	03 1 2023	03 3 2023	2	Closed	1774	Repuestos de Jesús, SRL	Services	Female	Legal Person	09 15 2006	Active	Unknown	DISTRITO NACIONAL
866	Comision de Defensa Comercial	Purchases Below the Threshold	ordinary process	10389.9	10389.9	0	03 21 2023	03 21 2023	0	Closed	1774	Repuestos de Jesús, SRL	Services	Female	Legal Person	09 15 2006	Active	Unknown	DISTRITO NACIONAL
733	Corporación de Fomento Industria Hotelera y Desarrollo del Turismo	Purchases Below the Threshold	ordinary process	19890	28051.2	8161.2	03 30 2023	04 3 2023	4	Closed	1774	Repuestos de Jesús, SRL	Goods	Female	Legal Person	09 15 2006	Active	Unknown	DISTRITO NACIONAL
842	MUSEO HISTORIA NATURAL	Purchases Below the Threshold	ordinary process	4012	4012	0	04 18 2023	04 18 2023	0	Closed	1774	Repuestos de Jesús, SRL	Services	Female	Legal Person	09 15 2006	Active	Unknown	DISTRITO NACIONAL
889	Consejo Nac Reglamentación y Fomento Industria Lechera	Purchases Below the Threshold	ordinary process	25378	19192.7	-6185.3	05 5 2023	05 8 2023	3	Closed	1774	Repuestos de Jesús, SRL	Goods	Female	Legal Person	09 15 2006	Active	Unknown	DISTRITO NACIONAL
842	MUSEO HISTORIA NATURAL	Purchases Below the Threshold	ordinary process	932.2	932.2	0	06 19 2023	06 19 2023	0	Active	1774	Repuestos de Jesús, SRL	Goods	Female	Legal Person	09 15 2006	Active	Unknown	DISTRITO NACIONAL
866	Comision de Defensa Comercial	Purchases Below the Threshold	ordinary process	9209.9	9209.9	0	07 13 2023	07 13 2023	0	Active	1774	Repuestos de Jesús, SRL	Services	Female	Legal Person	09 15 2006	Active	Unknown	DISTRITO NACIONAL
964	Defensor del Pueblo	Purchases Below the Threshold	ordinary process	3920	3451.5	-468.5	01 2 2018	01 2 2018	0	Closed	2656	MG General Supply, SRL	Goods	Female	Legal Person	11 7 2006	Active	Medium company	DISTRITO NACIONAL
632	Despacho de la Primera Dama	Purchases Below the Threshold	ordinary process	104500	86553	-17947	01 9 2018	01 10 2018	1	Active	2656	MG General Supply, SRL	Goods	Female	Legal Person	11 7 2006	Active	Medium company	DISTRITO NACIONAL
964	Defensor del Pueblo	Purchases Below the Threshold	ordinary process	8010	7150.8	-859.2	02 5 2018	02 6 2018	1	Closed	2656	MG General Supply, SRL	Goods	Female	Legal Person	11 7 2006	Active	Medium company	DISTRITO NACIONAL
545	Tesorería de la Seguridad Social	Minor Purchases	ordinary process	177041.3	62194.1656	-114847.1344	02 22 2018	03 7 2018	13	Cancelled	2656	MG General Supply, SRL	Goods	Female	Legal Person	11 7 2006	Active	Medium company	DISTRITO NACIONAL
545	Tesorería de la Seguridad Social	Minor Purchases	ordinary process	177041.3	62194.1656	-114847.1344	02 22 2018	03 8 2018	14	Closed	2656	MG General Supply, SRL	Goods	Female	Legal Person	11 7 2006	Active	Medium company	DISTRITO NACIONAL
964	Defensor del Pueblo	Purchases Below the Threshold	ordinary process	6960	6815.68	-144.32	03 26 2018	03 27 2018	1	Closed	2656	MG General Supply, SRL	Services	Female	Legal Person	11 7 2006	Active	Medium company	DISTRITO NACIONAL
887	Sistema Nacional de Atención a Emergencias y Seguridad 9-1-1	Minor Purchases	ordinary process	901000	24780	-876220	04 2 2018	04 19 2018	17	Closed	2656	MG General Supply, SRL	Goods	Female	Legal Person	11 7 2006	Active	Medium company	DISTRITO NACIONAL
684	Instituto Tecnológico de las Américas	Minor Purchases	ordinary process	700960	29382	-671578	04 10 2018	05 22 2018	42	Closed	2656	MG General Supply, SRL	Goods	Female	Legal Person	11 7 2006	Active	Medium company	DISTRITO NACIONAL
964	Defensor del Pueblo	Purchases Below the Threshold	ordinary process	4770	5787.9	1017.9	04 23 2018	04 24 2018	1	Closed	2656	MG General Supply, SRL	Goods	Female	Legal Person	11 7 2006	Active	Medium company	DISTRITO NACIONAL
964	Defensor del Pueblo	Purchases Below the Threshold	ordinary process	8445	9062.4	617.4	05 17 2018	05 21 2018	4	Closed	2656	MG General Supply, SRL	Services	Female	Legal Person	11 7 2006	Active	Medium company	DISTRITO NACIONAL
545	Tesorería de la Seguridad Social	Minor Purchases	ordinary process	138921.4	56809.92	-82111.48	05 22 2018	06 4 2018	13	Closed	2656	MG General Supply, SRL	Goods	Female	Legal Person	11 7 2006	Active	Medium company	DISTRITO NACIONAL
964	Defensor del Pueblo	Purchases Below the Threshold	ordinary process	6525	8914.9	2389.9	06 18 2018	06 20 2018	2	Closed	2656	MG General Supply, SRL	Goods	Female	Legal Person	11 7 2006	Active	Medium company	DISTRITO NACIONAL
637	Superintendencia de Electricidad	Purchases Below the Threshold	ordinary process	13000	15340	2340	07 26 2018	07 30 2018	4	Approved flow	2656	MG General Supply, SRL	Goods	Female	Legal Person	11 7 2006	Active	Medium company	DISTRITO NACIONAL
208	Administradora de Subsidios Sociales	Purchases Below the Threshold	ordinary process	34621.2	36462	1840.8	09 4 2018	09 7 2018	3	Closed	2656	MG General Supply, SRL	Goods	Female	Legal Person	11 7 2006	Active	Medium company	DISTRITO NACIONAL
632	Despacho de la Primera Dama	Price Comparison	ordinary process	1903395	757519.88	-1145875.12	09 11 2018	10 4 2018	23	Active	2656	MG General Supply, SRL	Goods	Female	Legal Person	11 7 2006	Active	Medium company	DISTRITO NACIONAL
905	Dirección de Fomento y Desarrollo de la Artesanía Nacional	Purchases Below the Threshold	ordinary process	9746.8	9746.8	0	11 28 2018	11 30 2018	2	Closed	2656	MG General Supply, SRL	Goods	Female	Legal Person	11 7 2006	Active	Medium company	DISTRITO NACIONAL
725	Consejo Nacional de Competitividad	Minor Purchases	ordinary process	694581.65	27130.8432	-667450.8068	12 7 2018	12 14 2018	7	Active	2656	MG General Supply, SRL	Goods	Female	Legal Person	11 7 2006	Active	Medium company	DISTRITO NACIONAL
964	Defensor del Pueblo	Purchases Below the Threshold	ordinary process	11250	9428.2	-1821.8	01 31 2019	02 4 2019	4	Closed	2656	MG General Supply, SRL	Goods	Female	Legal Person	11 7 2006	Active	Medium company	DISTRITO NACIONAL
637	Superintendencia de Electricidad	Purchases Below the Threshold	ordinary process	85000	58705	-26295	01 31 2019	02 1 2019	1	Active	2656	MG General Supply, SRL	Goods	Female	Legal Person	11 7 2006	Active	Medium company	DISTRITO NACIONAL
725	Consejo Nacional de Competitividad	Purchases Below the Threshold	ordinary process	125586.72	14375.232	-111211.488	03 25 2019	03 27 2019	2	Closed	2656	MG General Supply, SRL	Goods	Female	Legal Person	11 7 2006	Active	Medium company	DISTRITO NACIONAL
545	Tesorería de la Seguridad Social	Minor Purchases	ordinary process	143912.8	68554.7904	-75358.0096	03 20 2019	03 29 2019	9	Closed	2656	MG General Supply, SRL	Goods	Female	Legal Person	11 7 2006	Active	Medium company	DISTRITO NACIONAL
964	Defensor del Pueblo	Purchases Below the Threshold	ordinary process	12075	10649.5	-1425.5	04 1 2019	04 1 2019	0	Closed	2656	MG General Supply, SRL	Goods	Female	Legal Person	11 7 2006	Active	Medium company	DISTRITO NACIONAL
674	Superintendencia de Pensiones	Minor Purchases	ordinary process	147950	116121.44	-31828.56	04 16 2019	04 23 2019	7	Closed	2656	MG General Supply, SRL	Goods	Female	Legal Person	11 7 2006	Active	Medium company	DISTRITO NACIONAL
905	Dirección de Fomento y Desarrollo de la Artesanía Nacional	Purchases Below the Threshold	ordinary process	10537.4	10537.4	0	04 30 2019	05 2 2019	2	Closed	2656	MG General Supply, SRL	Goods	Female	Legal Person	11 7 2006	Active	Medium company	DISTRITO NACIONAL
964	Defensor del Pueblo	Purchases Below the Threshold	ordinary process	8500	7080	-1420	06 4 2019	06 5 2019	1	Closed	2656	MG General Supply, SRL	Goods	Female	Legal Person	11 7 2006	Active	Medium company	DISTRITO NACIONAL
887	Sistema Nacional de Atención a Emergencias y Seguridad 9-1-1	Minor Purchases	ordinary process	1020844.95	343359.35	-677485.6	06 5 2019	06 17 2019	12	Active	2656	MG General Supply, SRL	Goods	Female	Legal Person	11 7 2006	Active	Medium company	DISTRITO NACIONAL
208	Administradora de Subsidios Sociales	Purchases Below the Threshold	ordinary process	63342.4	63342.4	0	06 12 2019	06 13 2019	1	Closed	2656	MG General Supply, SRL	Goods	Female	Legal Person	11 7 2006	Active	Medium company	DISTRITO NACIONAL
545	Tesorería de la Seguridad Social	Minor Purchases	ordinary process	172610.4	38438.736	-134171.664	06 27 2019	07 24 2019	27	Closed	2656	MG General Supply, SRL	Goods	Female	Legal Person	11 7 2006	Active	Medium company	DISTRITO NACIONAL
255	Consejo Nacional Promoción y Apoyo Micro, Pequeña y Mediana Empresa	Minor Purchases	ordinary process	223280	18856.4	-204423.6	07 2 2019	07 5 2019	3	Closed	2656	MG General Supply, SRL	Goods	Female	Legal Person	11 7 2006	Active	Medium company	DISTRITO NACIONAL
674	Superintendencia de Pensiones	Purchases Below the Threshold	ordinary process	67890	52797.92	-15092.08	07 3 2019	07 5 2019	2	Closed	2656	MG General Supply, SRL	Goods	Female	Legal Person	11 7 2006	Active	Medium company	DISTRITO NACIONAL
674	Superintendencia de Pensiones	Purchases Below the Threshold	ordinary process	67890	3020.8	-64869.2	07 3 2019	07 5 2019	2	Cancelled	2656	MG General Supply, SRL	Unknown	Female	Legal Person	11 7 2006	Active	Medium company	DISTRITO NACIONAL
964	Defensor del Pueblo	Purchases Below the Threshold	ordinary process	9050	7416.3	-1633.7	07 10 2019	07 10 2019	0	Closed	2656	MG General Supply, SRL	Goods	Female	Legal Person	11 7 2006	Active	Medium company	DISTRITO NACIONAL
883	Instituto Superior de Formación Docente Salomé Ureña	Minor Purchases	ordinary process	811914	72570	-739344	07 4 2019	07 23 2019	19	Closed	2656	MG General Supply, SRL	Goods	Female	Legal Person	11 7 2006	Active	Medium company	DISTRITO NACIONAL
857	CONSEJO NACIONAL DE ZONAS FRANCAS DE EXPORTACION	Minor Purchases	ordinary process	252000	5380.8	-246619.2	07 8 2019	08 9 2019	32	Closed	2656	MG General Supply, SRL	Goods	Female	Legal Person	11 7 2006	Active	Medium company	DISTRITO NACIONAL
964	Defensor del Pueblo	Purchases Below the Threshold	ordinary process	9300	16201.4	6901.4	07 22 2019	07 23 2019	1	Closed	2656	MG General Supply, SRL	Goods	Female	Legal Person	11 7 2006	Active	Medium company	DISTRITO NACIONAL
197	Ministerio de la Presidencia	Minor Purchases	ordinary process	662240	9676	-652564	07 22 2019	08 5 2019	14	Closed	2656	MG General Supply, SRL	Goods	Female	Legal Person	11 7 2006	Active	Medium company	DISTRITO NACIONAL
197	Ministerio de la Presidencia	Minor Purchases	ordinary process	662240	9676	-652564	07 22 2019	08 5 2019	14	Cancelled	2656	MG General Supply, SRL	Goods	Female	Legal Person	11 7 2006	Active	Medium company	DISTRITO NACIONAL
905	Dirección de Fomento y Desarrollo de la Artesanía Nacional	Purchases Below the Threshold	ordinary process	8705	8691.88	-13.12	08 1 2019	08 15 2019	14	Closed	2656	MG General Supply, SRL	Goods	Female	Legal Person	11 7 2006	Active	Medium company	DISTRITO NACIONAL
964	Defensor del Pueblo	Purchases Below the Threshold	ordinary process	7200	8496	1296	08 30 2019	08 30 2019	0	Closed	2656	MG General Supply, SRL	Goods	Female	Legal Person	11 7 2006	Active	Medium company	DISTRITO NACIONAL
703	Oficina Presidencial de Tecnologias de la Información y Comunicación	Minor Purchases	ordinary process	472520	162132	-310388	08 27 2019	09 4 2019	8	Closed	2656	MG General Supply, SRL	Goods	Female	Legal Person	11 7 2006	Active	Medium company	DISTRITO NACIONAL
674	Superintendencia de Pensiones	Minor Purchases	ordinary process	173425	69266	-104159	10 8 2019	10 11 2019	3	Cancelled	2656	MG General Supply, SRL	Goods	Female	Legal Person	11 7 2006	Active	Medium company	DISTRITO NACIONAL
674	Superintendencia de Pensiones	Minor Purchases	ordinary process	173425	69266	-104159	10 8 2019	10 11 2019	3	Closed	2656	MG General Supply, SRL	Goods	Female	Legal Person	11 7 2006	Active	Medium company	DISTRITO NACIONAL
139	Contraloría Gral de la República	Minor Purchases	ordinary process	226578.97	12649.6	-213929.37	10 15 2019	11 7 2019	23	Active	2656	MG General Supply, SRL	Goods	Female	Legal Person	11 7 2006	Active	Medium company	DISTRITO NACIONAL
139	Contraloría Gral de la República	Minor Purchases	ordinary process	226578.97	12649.6	-213929.37	10 15 2019	10 31 2019	16	Cancelled	2656	MG General Supply, SRL	Unknown	Female	Legal Person	11 7 2006	Active	Medium company	DISTRITO NACIONAL
632	Despacho de la Primera Dama	Price Comparison	ordinary process	1993400	773146.62	-1220253.38	10 14 2019	11 8 2019	25	Closed	2656	MG General Supply, SRL	Goods	Female	Legal Person	11 7 2006	Active	Medium company	DISTRITO NACIONAL
964	Defensor del Pueblo	Purchases Below the Threshold	ordinary process	10200	8496	-1704	10 29 2019	10 29 2019	0	Closed	2656	MG General Supply, SRL	Goods	Female	Legal Person	11 7 2006	Active	Medium company	DISTRITO NACIONAL
545	Tesorería de la Seguridad Social	Minor Purchases	ordinary process	118566.4	66798.738	-51767.662	10 28 2019	11 11 2019	14	Closed	2656	MG General Supply, SRL	Goods	Female	Legal Person	11 7 2006	Active	Medium company	DISTRITO NACIONAL
905	Dirección de Fomento y Desarrollo de la Artesanía Nacional	Purchases Below the Threshold	ordinary process	33866	33866	0	11 8 2019	11 11 2019	3	Closed	2656	MG General Supply, SRL	Goods	Female	Legal Person	11 7 2006	Active	Medium company	DISTRITO NACIONAL
887	Sistema Nacional de Atención a Emergencias y Seguridad 9-1-1	Minor Purchases	ordinary process	1030000.09	9292.5	-1020707.59	11 11 2019	12 3 2019	22	Active	2656	MG General Supply, SRL	Goods	Female	Legal Person	11 7 2006	Active	Medium company	DISTRITO NACIONAL
887	Sistema Nacional de Atención a Emergencias y Seguridad 9-1-1	Minor Purchases	ordinary process	1030000.09	167041.98	-862958.11	11 11 2019	11 20 2019	9	Active	2656	MG General Supply, SRL	Goods	Female	Legal Person	11 7 2006	Active	Medium company	DISTRITO NACIONAL
982	Teatro Nacional Eduardo Brito	Minor Purchases	ordinary process	237500	201426	-36074	11 21 2019	12 3 2019	12	Closed	2656	MG General Supply, SRL	Goods	Female	Legal Person	11 7 2006	Active	Medium company	DISTRITO NACIONAL
964	Defensor del Pueblo	Purchases Below the Threshold	ordinary process	4350	3764.2	-585.8	12 2 2019	12 2 2019	0	Closed	2656	MG General Supply, SRL	Goods	Female	Legal Person	11 7 2006	Active	Medium company	DISTRITO NACIONAL
178	Gabinete de Coordinación de Políticas Sociales	Minor Purchases	ordinary process	527665	203520.5	-324144.5	12 2 2019	12 12 2019	10	Closed	2656	MG General Supply, SRL	Goods	Female	Legal Person	11 7 2006	Active	Medium company	DISTRITO NACIONAL
964	Defensor del Pueblo	Purchases Below the Threshold	ordinary process	12585	10697.88	-1887.12	01 23 2020	01 23 2020	0	Closed	2656	MG General Supply, SRL	Goods	Female	Legal Person	11 7 2006	Active	Medium company	DISTRITO NACIONAL
717	Oficina Nacional de la Propiedad Industrial	Minor Purchases	ordinary process	430750	55884.8	-374865.2	01 27 2020	02 7 2020	11	Closed	2656	MG General Supply, SRL	Goods	Female	Legal Person	11 7 2006	Active	Medium company	DISTRITO NACIONAL
674	Superintendencia de Pensiones	Minor Purchases	ordinary process	179175	103486	-75689	01 27 2020	01 30 2020	3	Closed	2656	MG General Supply, SRL	Goods	Female	Legal Person	11 7 2006	Active	Medium company	DISTRITO NACIONAL
982	Teatro Nacional Eduardo Brito	Purchases Below the Threshold	ordinary process	18690	10430.256	-8259.744	01 28 2020	02 4 2020	7	Closed	2656	MG General Supply, SRL	Goods	Female	Legal Person	11 7 2006	Active	Medium company	DISTRITO NACIONAL
885	Centro Cardio-Neuro Oftalmologico y Trasplante	Minor Purchases	ordinary process	384000	348052.8	-35947.2	02 5 2020	02 24 2020	19	Active	2656	MG General Supply, SRL	Goods	Female	Legal Person	11 7 2006	Active	Medium company	DISTRITO NACIONAL
672	Dirección de Información y Defensa Afiliados Seguridad Social	Purchases Below the Threshold	ordinary process	89797.9	104488.056	14690.156	02 11 2020	02 11 2020	0	Closed	2656	MG General Supply, SRL	Goods	Female	Legal Person	11 7 2006	Active	Medium company	DISTRITO NACIONAL
545	Tesorería de la Seguridad Social	Minor Purchases	ordinary process	146768.4	116805.84	-29962.56	02 14 2020	02 21 2020	7	Closed	2656	MG General Supply, SRL	Goods	Female	Legal Person	11 7 2006	Active	Medium company	DISTRITO NACIONAL
964	Defensor del Pueblo	Purchases Below the Threshold	ordinary process	12250	12939.88	689.88	03 5 2020	03 5 2020	0	Closed	2656	MG General Supply, SRL	Goods	Female	Legal Person	11 7 2006	Active	Medium company	DISTRITO NACIONAL
122	Dirección General de Bienes Nacionales	Purchases Below the Threshold	ordinary process	113240	120360	7120	05 12 2020	05 12 2020	0	Closed	2656	MG General Supply, SRL	Goods	Female	Legal Person	11 7 2006	Active	Medium company	DISTRITO NACIONAL
964	Defensor del Pueblo	Purchases Below the Threshold	ordinary process	7540	7227.5	-312.5	06 15 2020	06 15 2020	0	Closed	2656	MG General Supply, SRL	Goods	Female	Legal Person	11 7 2006	Active	Medium company	DISTRITO NACIONAL
905	Dirección de Fomento y Desarrollo de la Artesanía Nacional	Purchases Below the Threshold	ordinary process	6065.2	4838	-1227.2	08 19 2020	08 20 2020	1	Closed	2656	MG General Supply, SRL	Goods	Female	Legal Person	11 7 2006	Active	Medium company	DISTRITO NACIONAL
672	Dirección de Información y Defensa Afiliados Seguridad Social	Purchases Below the Threshold	ordinary process	146937	80535	-66402	09 4 2020	09 4 2020	0	Closed	2656	MG General Supply, SRL	Goods	Female	Legal Person	11 7 2006	Active	Medium company	DISTRITO NACIONAL
964	Defensor del Pueblo	Purchases Below the Threshold	ordinary process	19000	1935.2	-17064.8	09 25 2020	09 28 2020	3	Closed	2656	MG General Supply, SRL	Goods	Female	Legal Person	11 7 2006	Active	Medium company	DISTRITO NACIONAL
964	Defensor del Pueblo	Purchases Below the Threshold	ordinary process	34200	12224.8	-21975.2	11 3 2020	11 4 2020	1	Closed	2656	MG General Supply, SRL	Goods	Female	Legal Person	11 7 2006	Active	Medium company	DISTRITO NACIONAL
905	Dirección de Fomento y Desarrollo de la Artesanía Nacional	Purchases Below the Threshold	ordinary process	22448.32	22448.32	0	12 1 2020	12 3 2020	2	Closed	2656	MG General Supply, SRL	Goods	Female	Legal Person	11 7 2006	Active	Medium company	DISTRITO NACIONAL
964	Defensor del Pueblo	Purchases Below the Threshold	ordinary process	17500	16590.8	-909.2	04 20 2021	04 20 2021	0	Closed	2656	MG General Supply, SRL	Goods	Female	Legal Person	11 7 2006	Active	Medium company	DISTRITO NACIONAL
982	Teatro Nacional Eduardo Brito	Minor Purchases	ordinary process	107066	66290.04	-40775.96	05 25 2021	06 7 2021	13	Closed	2656	MG General Supply, SRL	Goods	Female	Legal Person	11 7 2006	Active	Medium company	DISTRITO NACIONAL
964	Defensor del Pueblo	Purchases Below the Threshold	ordinary process	28500	14295.7	-14204.3	06 9 2021	06 10 2021	1	Closed	2656	MG General Supply, SRL	Goods	Female	Legal Person	11 7 2006	Active	Medium company	DISTRITO NACIONAL
905	Dirección de Fomento y Desarrollo de la Artesanía Nacional	Purchases Below the Threshold	ordinary process	7440	7186.2	-253.8	06 17 2021	06 18 2021	1	Closed	2656	MG General Supply, SRL	Goods	Female	Legal Person	11 7 2006	Active	Medium company	DISTRITO NACIONAL
825	Instituto Dominicano de Investigaciones Agropecuarias y Forestales	Purchases Below the Threshold	ordinary process	136800.16	136800.06	-0.1	05 6 2022	05 10 2022	4	Closed	2656	MG General Supply, SRL	Goods	Female	Legal Person	11 7 2006	Active	Medium company	DISTRITO NACIONAL
6	Procuraduría General de la República	Purchases Below the Threshold	ordinary process	42000	45475.0052	3475.0052	01 2 2018	01 10 2018	8	Active	29785	CEMEX Dominicana, SA	Services	Male	Legal Person	03 4 2013	Active	Large company	DISTRITO NACIONAL
837	Parque Zoológico Nacional	Minor Purchases	ordinary process	320000	288000.24	-31999.76	01 22 2020	01 24 2020	2	Rescinded	29785	CEMEX Dominicana, SA	Services	Male	Legal Person	03 4 2013	Active	Large company	DISTRITO NACIONAL
837	Parque Zoológico Nacional	Purchases Below the Threshold	ordinary process	70000	56800.008	-13199.992	05 19 2020	05 20 2020	1	Closed	29785	CEMEX Dominicana, SA	Services	Male	Legal Person	03 4 2013	Active	Large company	DISTRITO NACIONAL
997	Caja de Ahorros Para Obreros y Monte de Piedad	Exception Processes	air tickets, repairs and fuels	150000	150000	0	01 2 2018	01 2 2018	0	Closed	1758	Erik Gas del 2000, SRL	Services	Male	Legal Person	09 14 2006	Active	Unknown	DISTRITO NACIONAL
152	Comité de Retiro de la Policia Nacional	Exception Processes	exclusivity	464000	464000	0	01 24 2018	01 24 2018	0	Active	1758	Erik Gas del 2000, SRL	Goods	Male	Legal Person	09 14 2006	Active	Unknown	DISTRITO NACIONAL
7	Dirección General de Contrataciones Públicas	Exception Processes	air tickets, repairs and fuels	425000	200000	-225000	01 24 2018	01 24 2018	0	Closed	1758	Erik Gas del 2000, SRL	Services	Male	Legal Person	09 14 2006	Active	Unknown	DISTRITO NACIONAL
253	DIRECCION GENERAL DE MINERIA	Exception Processes	air tickets, repairs and fuels	200000	200000	0	01 31 2018	01 31 2018	0	Active	1758	Erik Gas del 2000, SRL	Goods	Male	Legal Person	09 14 2006	Active	Unknown	DISTRITO NACIONAL
997	Caja de Ahorros Para Obreros y Monte de Piedad	Exception Processes	air tickets, repairs and fuels	150000	150000	0	02 1 2018	02 1 2018	0	Closed	1758	Erik Gas del 2000, SRL	Goods	Male	Legal Person	09 14 2006	Active	Unknown	DISTRITO NACIONAL
264	MINISTERIO DE EDUCACION SUPERIOR, CIENCIA Y TECNOLOGIA	Exception Processes	air tickets, repairs and fuels	650100	650000	-100	02 7 2018	02 7 2018	0	Active	1758	Erik Gas del 2000, SRL	Services	Male	Legal Person	09 14 2006	Active	Unknown	DISTRITO NACIONAL
699	Consejo Nacional de Investigaciones Agropecuarias y Forestales	Exception Processes	air tickets, repairs and fuels	131000.26	130999.9598	-0.3002	02 8 2018	02 8 2018	0	Active	1758	Erik Gas del 2000, SRL	Goods	Male	Legal Person	09 14 2006	Active	Unknown	DISTRITO NACIONAL
152	Comité de Retiro de la Policia Nacional	Exception Processes	exclusivity	464000	464000	0	02 8 2018	02 8 2018	0	Active	1758	Erik Gas del 2000, SRL	Goods	Male	Legal Person	09 14 2006	Active	Unknown	DISTRITO NACIONAL
253	DIRECCION GENERAL DE MINERIA	Exception Processes	air tickets, repairs and fuels	200000	200000	0	02 9 2018	02 12 2018	3	Active	1758	Erik Gas del 2000, SRL	Services	Male	Legal Person	09 14 2006	Active	Unknown	DISTRITO NACIONAL
256	REMEDIACION AMBIENTAL MINA PUEBLO VIEJO	Exception Processes	air tickets, repairs and fuels	140000	140000	0	02 16 2018	02 16 2018	0	Active	1758	Erik Gas del 2000, SRL	Goods	Male	Legal Person	09 14 2006	Active	Unknown	DISTRITO NACIONAL
217	Dirección General de Presupuesto	Exception Processes	air tickets, repairs and fuels	48000	48000	0	02 20 2018	02 20 2018	0	Closed	1758	Erik Gas del 2000, SRL	Goods	Male	Legal Person	09 14 2006	Active	Unknown	DISTRITO NACIONAL
699	Consejo Nacional de Investigaciones Agropecuarias y Forestales	Exception Processes	air tickets, repairs and fuels	197557.5	178299.549	-19257.951	02 20 2018	02 20 2018	0	Active	1758	Erik Gas del 2000, SRL	Goods	Male	Legal Person	09 14 2006	Active	Unknown	DISTRITO NACIONAL
7	Dirección General de Contrataciones Públicas	Exception Processes	air tickets, repairs and fuels	425000	200000	-225000	02 22 2018	02 23 2018	1	Closed	1758	Erik Gas del 2000, SRL	Services	Male	Legal Person	09 14 2006	Active	Unknown	DISTRITO NACIONAL
264	MINISTERIO DE EDUCACION SUPERIOR, CIENCIA Y TECNOLOGIA	Exception Processes	air tickets, repairs and fuels	89250	89250	0	02 26 2018	02 26 2018	0	Active	1758	Erik Gas del 2000, SRL	Services	Male	Legal Person	09 14 2006	Active	Unknown	DISTRITO NACIONAL
997	Caja de Ahorros Para Obreros y Monte de Piedad	Exception Processes	air tickets, repairs and fuels	150000	150000	0	03 1 2018	03 1 2018	0	Closed	1758	Erik Gas del 2000, SRL	Services	Male	Legal Person	09 14 2006	Active	Unknown	DISTRITO NACIONAL
586	Consejo Nacional de la Seguridad Social	Purchases Below the Threshold	ordinary process	9000	9000.2376	0.2376	03 5 2018	03 7 2018	2	Active	1758	Erik Gas del 2000, SRL	Services	Male	Legal Person	09 14 2006	Active	Unknown	DISTRITO NACIONAL
264	MINISTERIO DE EDUCACION SUPERIOR, CIENCIA Y TECNOLOGIA	Exception Processes	air tickets, repairs and fuels	650100	650000	-100	03 7 2018	03 8 2018	1	Active	1758	Erik Gas del 2000, SRL	Services	Male	Legal Person	09 14 2006	Active	Unknown	DISTRITO NACIONAL
152	Comité de Retiro de la Policia Nacional	Exception Processes	exclusivity	464000	464000	0	03 7 2018	03 8 2018	1	Active	1758	Erik Gas del 2000, SRL	Goods	Male	Legal Person	09 14 2006	Active	Unknown	DISTRITO NACIONAL
217	Dirección General de Presupuesto	Exception Processes	air tickets, repairs and fuels	24000	24000	0	03 8 2018	03 9 2018	1	Closed	1758	Erik Gas del 2000, SRL	Goods	Male	Legal Person	09 14 2006	Active	Unknown	DISTRITO NACIONAL
253	DIRECCION GENERAL DE MINERIA	Minor Purchases	ordinary process	200000	200000	0	03 13 2018	03 16 2018	3	Active	1758	Erik Gas del 2000, SRL	Goods	Male	Legal Person	09 14 2006	Active	Unknown	DISTRITO NACIONAL
711	Administradora de Riesgos de Salud para los Maestros	Exception Processes	air tickets, repairs and fuels	70000	73440	3440	03 15 2018	03 19 2018	4	Closed	1758	Erik Gas del 2000, SRL	Services	Male	Legal Person	09 14 2006	Active	Unknown	DISTRITO NACIONAL
699	Consejo Nacional de Investigaciones Agropecuarias y Forestales	Exception Processes	air tickets, repairs and fuels	178299.81	178299.807	-0.003	03 23 2018	03 23 2018	0	Active	1758	Erik Gas del 2000, SRL	Goods	Male	Legal Person	09 14 2006	Active	Unknown	DISTRITO NACIONAL
997	Caja de Ahorros Para Obreros y Monte de Piedad	Exception Processes	air tickets, repairs and fuels	150000	150000	0	04 2 2018	04 2 2018	0	Closed	1758	Erik Gas del 2000, SRL	Services	Male	Legal Person	09 14 2006	Active	Unknown	DISTRITO NACIONAL
217	Dirección General de Presupuesto	Exception Processes	air tickets, repairs and fuels	50000	50000	0	04 4 2018	04 6 2018	2	Closed	1758	Erik Gas del 2000, SRL	Goods	Male	Legal Person	09 14 2006	Active	Unknown	DISTRITO NACIONAL
253	DIRECCION GENERAL DE MINERIA	Minor Purchases	ordinary process	200000	200000	0	04 3 2018	04 6 2018	3	Closed	1758	Erik Gas del 2000, SRL	Goods	Male	Legal Person	09 14 2006	Active	Unknown	DISTRITO NACIONAL
152	Comité de Retiro de la Policia Nacional	Exception Processes	exclusivity	464000	464000	0	04 5 2018	04 6 2018	1	Active	1758	Erik Gas del 2000, SRL	Goods	Male	Legal Person	09 14 2006	Active	Unknown	DISTRITO NACIONAL
264	MINISTERIO DE EDUCACION SUPERIOR, CIENCIA Y TECNOLOGIA	Exception Processes	air tickets, repairs and fuels	650100	650000	-100	04 6 2018	04 6 2018	0	Approved flow	1758	Erik Gas del 2000, SRL	Services	Male	Legal Person	09 14 2006	Active	Unknown	DISTRITO NACIONAL
924	Direccion General de Proyectos Estrategicos y Especiales de la Presidencia de la Republica (PROPEEP)	Purchases Below the Threshold	ordinary process	80000	80000	0	04 12 2018	04 12 2018	0	Active	1758	Erik Gas del 2000, SRL	Goods	Male	Legal Person	09 14 2006	Active	Unknown	DISTRITO NACIONAL
7	Dirección General de Contrataciones Públicas	Exception Processes	air tickets, repairs and fuels	850000	400000	-450000	04 16 2018	04 17 2018	1	Closed	1758	Erik Gas del 2000, SRL	Services	Male	Legal Person	09 14 2006	Active	Unknown	DISTRITO NACIONAL
264	MINISTERIO DE EDUCACION SUPERIOR, CIENCIA Y TECNOLOGIA	Exception Processes	air tickets, repairs and fuels	650100	650000	-100	04 16 2018	04 16 2018	0	Approved flow	1758	Erik Gas del 2000, SRL	Services	Male	Legal Person	09 14 2006	Active	Unknown	DISTRITO NACIONAL
217	Dirección General de Presupuesto	Exception Processes	air tickets, repairs and fuels	96500	98800	2300	04 16 2018	05 3 2018	17	Closed	1758	Erik Gas del 2000, SRL	Services	Male	Legal Person	09 14 2006	Active	Unknown	DISTRITO NACIONAL
814	Dirección General de Cine	Exception Processes	air tickets, repairs and fuels	38520	38520	0	04 20 2018	04 20 2018	0	Closed	1758	Erik Gas del 2000, SRL	Services	Male	Legal Person	09 14 2006	Active	Unknown	DISTRITO NACIONAL
699	Consejo Nacional de Investigaciones Agropecuarias y Forestales	Exception Processes	air tickets, repairs and fuels	178299.78	178299.777	-0.003	04 25 2018	04 25 2018	0	Active	1758	Erik Gas del 2000, SRL	Goods	Male	Legal Person	09 14 2006	Active	Unknown	DISTRITO NACIONAL
264	MINISTERIO DE EDUCACION SUPERIOR, CIENCIA Y TECNOLOGIA	Exception Processes	air tickets, repairs and fuels	650100	650000	-100	05 1 2018	05 1 2018	0	Approved flow	1758	Erik Gas del 2000, SRL	Services	Male	Legal Person	09 14 2006	Active	Unknown	DISTRITO NACIONAL
997	Caja de Ahorros Para Obreros y Monte de Piedad	Exception Processes	air tickets, repairs and fuels	150000	150000	0	05 1 2018	05 1 2018	0	Closed	1758	Erik Gas del 2000, SRL	Services	Male	Legal Person	09 14 2006	Active	Unknown	DISTRITO NACIONAL
217	Dirección General de Presupuesto	Exception Processes	air tickets, repairs and fuels	30000	30000	0	05 7 2018	05 8 2018	1	Closed	1758	Erik Gas del 2000, SRL	Goods	Male	Legal Person	09 14 2006	Active	Unknown	DISTRITO NACIONAL
152	Comité de Retiro de la Policia Nacional	Exception Processes	exclusivity	464000	464000	0	05 9 2018	05 9 2018	0	Active	1758	Erik Gas del 2000, SRL	Goods	Male	Legal Person	09 14 2006	Active	Unknown	DISTRITO NACIONAL
253	DIRECCION GENERAL DE MINERIA	Minor Purchases	ordinary process	200000	200000	0	05 9 2018	05 15 2018	6	Active	1758	Erik Gas del 2000, SRL	Goods	Male	Legal Person	09 14 2006	Active	Unknown	DISTRITO NACIONAL
264	MINISTERIO DE EDUCACION SUPERIOR, CIENCIA Y TECNOLOGIA	Exception Processes	air tickets, repairs and fuels	652000	650000	-2000	05 23 2018	05 23 2018	0	Active	1758	Erik Gas del 2000, SRL	Services	Male	Legal Person	09 14 2006	Active	Unknown	DISTRITO NACIONAL
699	Consejo Nacional de Investigaciones Agropecuarias y Forestales	Exception Processes	air tickets, repairs and fuels	178299.74	178299.735	-0.005	05 25 2018	05 25 2018	0	Active	1758	Erik Gas del 2000, SRL	Goods	Male	Legal Person	09 14 2006	Active	Unknown	DISTRITO NACIONAL
997	Caja de Ahorros Para Obreros y Monte de Piedad	Exception Processes	air tickets, repairs and fuels	150000	150000	0	06 1 2018	06 1 2018	0	Closed	1758	Erik Gas del 2000, SRL	Services	Male	Legal Person	09 14 2006	Active	Unknown	DISTRITO NACIONAL
217	Dirección General de Presupuesto	Exception Processes	air tickets, repairs and fuels	44000	44000	0	06 6 2018	06 7 2018	1	Closed	1758	Erik Gas del 2000, SRL	Goods	Male	Legal Person	09 14 2006	Active	Unknown	DISTRITO NACIONAL
253	DIRECCION GENERAL DE MINERIA	Minor Purchases	ordinary process	200000	200000	0	06 8 2018	06 12 2018	4	Active	1758	Erik Gas del 2000, SRL	Goods	Male	Legal Person	09 14 2006	Active	Unknown	DISTRITO NACIONAL
699	Consejo Nacional de Investigaciones Agropecuarias y Forestales	Exception Processes	air tickets, repairs and fuels	2000	1000.0028	-999.9972	06 12 2018	06 12 2018	0	Active	1758	Erik Gas del 2000, SRL	Services	Male	Legal Person	09 14 2006	Active	Unknown	DISTRITO NACIONAL
264	MINISTERIO DE EDUCACION SUPERIOR, CIENCIA Y TECNOLOGIA	Exception Processes	air tickets, repairs and fuels	99900	99800	-100	06 12 2018	06 12 2018	0	Approved flow	1758	Erik Gas del 2000, SRL	Services	Male	Legal Person	09 14 2006	Active	Unknown	DISTRITO NACIONAL
152	Comité de Retiro de la Policia Nacional	Exception Processes	exclusivity	464000	464000	0	06 15 2018	06 15 2018	0	Active	1758	Erik Gas del 2000, SRL	Goods	Male	Legal Person	09 14 2006	Active	Unknown	DISTRITO NACIONAL
997	Caja de Ahorros Para Obreros y Monte de Piedad	Exception Processes	air tickets, repairs and fuels	150000	150000	0	07 2 2018	07 2 2018	0	Closed	1758	Erik Gas del 2000, SRL	Services	Male	Legal Person	09 14 2006	Active	Unknown	DISTRITO NACIONAL
264	MINISTERIO DE EDUCACION SUPERIOR, CIENCIA Y TECNOLOGIA	Exception Processes	air tickets, repairs and fuels	650100	650000	-100	07 2 2018	07 2 2018	0	Active	1758	Erik Gas del 2000, SRL	Services	Male	Legal Person	09 14 2006	Active	Unknown	DISTRITO NACIONAL
814	Dirección General de Cine	Exception Processes	air tickets, repairs and fuels	219000	219000	0	07 2 2018	07 2 2018	0	Closed	1758	Erik Gas del 2000, SRL	Goods	Male	Legal Person	09 14 2006	Active	Unknown	DISTRITO NACIONAL
699	Consejo Nacional de Investigaciones Agropecuarias y Forestales	Exception Processes	air tickets, repairs and fuels	178300.59	178300.588	-0.002	07 11 2018	07 11 2018	0	Active	1758	Erik Gas del 2000, SRL	Goods	Male	Legal Person	09 14 2006	Active	Unknown	DISTRITO NACIONAL
152	Comité de Retiro de la Policia Nacional	Exception Processes	exclusivity	464000	464000	0	07 12 2018	07 12 2018	0	Active	1758	Erik Gas del 2000, SRL	Goods	Male	Legal Person	09 14 2006	Active	Unknown	DISTRITO NACIONAL
711	Administradora de Riesgos de Salud para los Maestros	Exception Processes	single provider	69999	60180	-9819	07 13 2018	07 16 2018	3	Cancelled	1758	Erik Gas del 2000, SRL	Unknown	Male	Legal Person	09 14 2006	Active	Unknown	DISTRITO NACIONAL
711	Administradora de Riesgos de Salud para los Maestros	Exception Processes	single provider	69999	60180	-9819	07 13 2018	07 16 2018	3	Closed	1758	Erik Gas del 2000, SRL	Services	Male	Legal Person	09 14 2006	Active	Unknown	DISTRITO NACIONAL
217	Dirección General de Presupuesto	Exception Processes	air tickets, repairs and fuels	84000	84000	0	07 16 2018	07 16 2018	0	Closed	1758	Erik Gas del 2000, SRL	Goods	Male	Legal Person	09 14 2006	Active	Unknown	DISTRITO NACIONAL
997	Caja de Ahorros Para Obreros y Monte de Piedad	Exception Processes	air tickets, repairs and fuels	150000	150000	0	08 1 2018	08 1 2018	0	Closed	1758	Erik Gas del 2000, SRL	Services	Male	Legal Person	09 14 2006	Active	Unknown	DISTRITO NACIONAL
264	MINISTERIO DE EDUCACION SUPERIOR, CIENCIA Y TECNOLOGIA	Exception Processes	air tickets, repairs and fuels	650100	650000	-100	08 8 2018	08 9 2018	1	Active	1758	Erik Gas del 2000, SRL	Services	Male	Legal Person	09 14 2006	Active	Unknown	DISTRITO NACIONAL
253	DIRECCION GENERAL DE MINERIA	Minor Purchases	ordinary process	200000	200000	0	08 6 2018	08 8 2018	2	Active	1758	Erik Gas del 2000, SRL	Goods	Male	Legal Person	09 14 2006	Active	Unknown	DISTRITO NACIONAL
217	Dirección General de Presupuesto	Purchases Below the Threshold	ordinary process	36000	36000	0	08 9 2018	08 9 2018	0	Closed	1758	Erik Gas del 2000, SRL	Goods	Male	Legal Person	09 14 2006	Active	Unknown	DISTRITO NACIONAL
152	Comité de Retiro de la Policia Nacional	Exception Processes	exclusivity	464000	464000	0	08 13 2018	08 13 2018	0	Active	1758	Erik Gas del 2000, SRL	Goods	Male	Legal Person	09 14 2006	Active	Unknown	DISTRITO NACIONAL
699	Consejo Nacional de Investigaciones Agropecuarias y Forestales	Exception Processes	air tickets, repairs and fuels	178299.78	178299.781	0.001	08 17 2018	08 20 2018	3	Active	1758	Erik Gas del 2000, SRL	Goods	Male	Legal Person	09 14 2006	Active	Unknown	DISTRITO NACIONAL
586	Consejo Nacional de la Seguridad Social	Purchases Below the Threshold	ordinary process	9000	9000.004	0.004	08 20 2018	08 20 2018	0	Active	1758	Erik Gas del 2000, SRL	Services	Male	Legal Person	09 14 2006	Active	Unknown	DISTRITO NACIONAL
997	Caja de Ahorros Para Obreros y Monte de Piedad	Minor Purchases	ordinary process	150000	150000	0	08 31 2018	09 4 2018	4	Closed	1758	Erik Gas del 2000, SRL	Services	Male	Legal Person	09 14 2006	Active	Unknown	DISTRITO NACIONAL
253	DIRECCION GENERAL DE MINERIA	Minor Purchases	ordinary process	200000	200000	0	09 4 2018	09 7 2018	3	Active	1758	Erik Gas del 2000, SRL	Goods	Male	Legal Person	09 14 2006	Active	Unknown	DISTRITO NACIONAL
217	Dirección General de Presupuesto	Purchases Below the Threshold	ordinary process	36000	36000	0	09 11 2018	09 11 2018	0	Closed	1758	Erik Gas del 2000, SRL	Goods	Male	Legal Person	09 14 2006	Active	Unknown	DISTRITO NACIONAL
977	Dirección General de Bellas Artes	Purchases Below the Threshold	ordinary process	76000	78320	2320	09 11 2018	09 12 2018	1	Closed	1758	Erik Gas del 2000, SRL	Goods	Male	Legal Person	09 14 2006	Active	Unknown	DISTRITO NACIONAL
152	Comité de Retiro de la Policia Nacional	Minor Purchases	ordinary process	464000	464000	0	09 12 2018	09 17 2018	5	Closed	1758	Erik Gas del 2000, SRL	Goods	Male	Legal Person	09 14 2006	Active	Unknown	DISTRITO NACIONAL
997	Caja de Ahorros Para Obreros y Monte de Piedad	Minor Purchases	ordinary process	150000	150000	0	09 25 2018	09 27 2018	2	Closed	1758	Erik Gas del 2000, SRL	Services	Male	Legal Person	09 14 2006	Active	Unknown	DISTRITO NACIONAL
699	Consejo Nacional de Investigaciones Agropecuarias y Forestales	Minor Purchases	ordinary process	187790	178299.286	-9490.714	09 25 2018	10 2 2018	7	Active	1758	Erik Gas del 2000, SRL	Goods	Male	Legal Person	09 14 2006	Active	Unknown	DISTRITO NACIONAL
977	Dirección General de Bellas Artes	Minor Purchases	ordinary process	165400	165400	0	10 4 2018	10 31 2018	27	Closed	1758	Erik Gas del 2000, SRL	Goods	Male	Legal Person	09 14 2006	Active	Unknown	DISTRITO NACIONAL
901	Unidad de Análisis Financiero	Minor Purchases	ordinary process	430000	260000	-170000	10 9 2018	10 12 2018	3	Closed	1758	Erik Gas del 2000, SRL	Services	Male	Legal Person	09 14 2006	Active	Unknown	DISTRITO NACIONAL
217	Dirección General de Presupuesto	Purchases Below the Threshold	ordinary process	120000	120000	0	10 18 2018	10 18 2018	0	Closed	1758	Erik Gas del 2000, SRL	Goods	Male	Legal Person	09 14 2006	Active	Unknown	DISTRITO NACIONAL
253	DIRECCION GENERAL DE MINERIA	Minor Purchases	ordinary process	600000	600000	0	10 17 2018	10 23 2018	6	Active	1758	Erik Gas del 2000, SRL	Goods	Male	Legal Person	09 14 2006	Active	Unknown	DISTRITO NACIONAL
699	Consejo Nacional de Investigaciones Agropecuarias y Forestales	Minor Purchases	ordinary process	780400.35	778622.073	-1778.277	10 24 2018	10 30 2018	6	Active	1758	Erik Gas del 2000, SRL	Goods	Male	Legal Person	09 14 2006	Active	Unknown	DISTRITO NACIONAL
997	Caja de Ahorros Para Obreros y Monte de Piedad	Minor Purchases	ordinary process	150000	150000	0	10 25 2018	10 30 2018	5	Closed	1758	Erik Gas del 2000, SRL	Services	Male	Legal Person	09 14 2006	Active	Unknown	DISTRITO NACIONAL
814	Dirección General de Cine	Purchases Below the Threshold	ordinary process	77520	77520	0	10 30 2018	10 30 2018	0	Closed	1758	Erik Gas del 2000, SRL	Goods	Male	Legal Person	09 14 2006	Active	Unknown	DISTRITO NACIONAL
977	Dirección General de Bellas Artes	Minor Purchases	ordinary process	184400	184400	0	11 2 2018	11 26 2018	24	Closed	1758	Erik Gas del 2000, SRL	Goods	Male	Legal Person	09 14 2006	Active	Unknown	DISTRITO NACIONAL
940	Biblioteca Nacional Pedro Henríquez Ureña	Minor Purchases	ordinary process	555000	555000	0	11 13 2018	11 15 2018	2	Closed	1758	Erik Gas del 2000, SRL	Goods	Male	Legal Person	09 14 2006	Active	Unknown	DISTRITO NACIONAL
253	DIRECCION GENERAL DE MINERIA	Minor Purchases	ordinary process	149644	141052	-8592	11 23 2018	11 28 2018	5	Modified	1758	Erik Gas del 2000, SRL	Goods	Male	Legal Person	09 14 2006	Active	Unknown	DISTRITO NACIONAL
997	Caja de Ahorros Para Obreros y Monte de Piedad	Minor Purchases	ordinary process	150000	150000	0	11 28 2018	12 3 2018	5	Closed	1758	Erik Gas del 2000, SRL	Services	Male	Legal Person	09 14 2006	Active	Unknown	DISTRITO NACIONAL
977	Dirección General de Bellas Artes	Minor Purchases	ordinary process	184400	184400	0	12 5 2018	12 7 2018	2	Closed	1758	Erik Gas del 2000, SRL	Goods	Male	Legal Person	09 14 2006	Active	Unknown	DISTRITO NACIONAL
997	Caja de Ahorros Para Obreros y Monte de Piedad	Minor Purchases	ordinary process	450000	450000	0	01 2 2019	01 7 2019	5	Closed	1758	Erik Gas del 2000, SRL	Services	Male	Legal Person	09 14 2006	Active	Unknown	DISTRITO NACIONAL
977	Dirección General de Bellas Artes	Minor Purchases	ordinary process	553200	553200	0	01 23 2019	01 29 2019	6	Closed	1758	Erik Gas del 2000, SRL	Goods	Male	Legal Person	09 14 2006	Active	Unknown	DISTRITO NACIONAL
940	Biblioteca Nacional Pedro Henríquez Ureña	Price Comparison	ordinary process	1140000	1140000	0	02 13 2019	03 7 2019	22	Closed	1758	Erik Gas del 2000, SRL	Goods	Male	Legal Person	09 14 2006	Active	Unknown	DISTRITO NACIONAL
146	Dirección Central de Policía de Turismo	National Public Tender	ordinary process	20988000	6000000	-14988000	01 17 2019	03 14 2019	56	Closed	1758	Erik Gas del 2000, SRL	Goods	Male	Legal Person	09 14 2006	Active	Unknown	DISTRITO NACIONAL
699	Consejo Nacional de Investigaciones Agropecuarias y Forestales	Minor Purchases	ordinary process	1020000	1020000	0	03 8 2019	03 15 2019	7	Closed	1758	Erik Gas del 2000, SRL	Goods	Male	Legal Person	09 14 2006	Active	Unknown	DISTRITO NACIONAL
901	Unidad de Análisis Financiero	Minor Purchases	ordinary process	200000	75000	-125000	04 1 2019	04 10 2019	9	Closed	1758	Erik Gas del 2000, SRL	Services	Male	Legal Person	09 14 2006	Active	Unknown	DISTRITO NACIONAL
997	Caja de Ahorros Para Obreros y Monte de Piedad	Minor Purchases	ordinary process	450000	450000	0	04 1 2019	04 5 2019	4	Closed	1758	Erik Gas del 2000, SRL	Services	Male	Legal Person	09 14 2006	Active	Unknown	DISTRITO NACIONAL
977	Dirección General de Bellas Artes	Minor Purchases	ordinary process	970000	360400	-609600	04 5 2019	04 11 2019	6	Closed	1758	Erik Gas del 2000, SRL	Goods	Male	Legal Person	09 14 2006	Active	Unknown	DISTRITO NACIONAL
1040	Quisqueya Empieza Contigo	Minor Purchases	ordinary process	800000	800000	0	04 12 2019	04 23 2019	11	Active	1758	Erik Gas del 2000, SRL	Goods	Male	Legal Person	09 14 2006	Active	Unknown	DISTRITO NACIONAL
901	Unidad de Análisis Financiero	Minor Purchases	ordinary process	280000	170000	-110000	07 2 2019	07 5 2019	3	Closed	1758	Erik Gas del 2000, SRL	Goods	Male	Legal Person	09 14 2006	Active	Unknown	DISTRITO NACIONAL
997	Caja de Ahorros Para Obreros y Monte de Piedad	Minor Purchases	ordinary process	450000	450000	0	07 1 2019	07 5 2019	4	Closed	1758	Erik Gas del 2000, SRL	Services	Male	Legal Person	09 14 2006	Active	Unknown	DISTRITO NACIONAL
711	Administradora de Riesgos de Salud para los Maestros	Purchases Below the Threshold	ordinary process	51810	51810	0	08 13 2019	08 14 2019	1	Closed	1758	Erik Gas del 2000, SRL	Goods	Male	Legal Person	09 14 2006	Active	Unknown	DISTRITO NACIONAL
814	Dirección General de Cine	Purchases Below the Threshold	ordinary process	35220	35220	0	08 20 2019	08 20 2019	0	Closed	1758	Erik Gas del 2000, SRL	Services	Male	Legal Person	09 14 2006	Active	Unknown	DISTRITO NACIONAL
982	Teatro Nacional Eduardo Brito	Price Comparison	ordinary process	1531100	1492940	-38160	08 14 2019	09 13 2019	30	Closed	1758	Erik Gas del 2000, SRL	Goods	Male	Legal Person	09 14 2006	Active	Unknown	DISTRITO NACIONAL
253	DIRECCION GENERAL DE MINERIA	Purchases Below the Threshold	ordinary process	8400	8400.0004	0.0004	09 12 2019	09 17 2019	5	Active	1758	Erik Gas del 2000, SRL	Services	Male	Legal Person	09 14 2006	Active	Unknown	DISTRITO NACIONAL
997	Caja de Ahorros Para Obreros y Monte de Piedad	Minor Purchases	ordinary process	450000	450000	0	10 1 2019	10 4 2019	3	Closed	1758	Erik Gas del 2000, SRL	Services	Male	Legal Person	09 14 2006	Active	Unknown	DISTRITO NACIONAL
253	DIRECCION GENERAL DE MINERIA	Purchases Below the Threshold	ordinary process	8960	8400.0004	-559.9996	11 18 2019	11 20 2019	2	Closed	1758	Erik Gas del 2000, SRL	Goods	Male	Legal Person	09 14 2006	Active	Unknown	DISTRITO NACIONAL
901	Unidad de Análisis Financiero	Purchases Below the Threshold	ordinary process	120000	50000	-70000	12 13 2019	12 16 2019	3	Closed	1758	Erik Gas del 2000, SRL	Goods	Male	Legal Person	09 14 2006	Active	Unknown	DISTRITO NACIONAL
997	Caja de Ahorros Para Obreros y Monte de Piedad	Minor Purchases	ordinary process	450000	450000	0	01 2 2020	01 8 2020	6	Closed	1758	Erik Gas del 2000, SRL	Services	Male	Legal Person	09 14 2006	Active	Unknown	DISTRITO NACIONAL
940	Biblioteca Nacional Pedro Henríquez Ureña	Price Comparison	ordinary process	1170000	1170000	0	01 29 2020	02 17 2020	19	Closed	1758	Erik Gas del 2000, SRL	Goods	Male	Legal Person	09 14 2006	Active	Unknown	DISTRITO NACIONAL
711	Administradora de Riesgos de Salud para los Maestros	Purchases Below the Threshold	ordinary process	34960	34960	0	02 19 2020	02 20 2020	1	Closed	1758	Erik Gas del 2000, SRL	Goods	Male	Legal Person	09 14 2006	Active	Unknown	DISTRITO NACIONAL
253	DIRECCION GENERAL DE MINERIA	Purchases Below the Threshold	ordinary process	9800	8400.0004	-1399.9996	02 20 2020	02 21 2020	1	Closed	1758	Erik Gas del 2000, SRL	Services	Male	Legal Person	09 14 2006	Active	Unknown	DISTRITO NACIONAL
901	Unidad de Análisis Financiero	Minor Purchases	ordinary process	350000	124999.996	-225000.004	03 16 2020	03 18 2020	2	Closed	1758	Erik Gas del 2000, SRL	Goods	Male	Legal Person	09 14 2006	Active	Unknown	DISTRITO NACIONAL
997	Caja de Ahorros Para Obreros y Monte de Piedad	Minor Purchases	ordinary process	450000	450000	0	05 21 2020	05 27 2020	6	Closed	1758	Erik Gas del 2000, SRL	Services	Male	Legal Person	09 14 2006	Active	Unknown	DISTRITO NACIONAL
253	DIRECCION GENERAL DE MINERIA	Purchases Below the Threshold	ordinary process	8960	8400	-560	06 18 2020	06 19 2020	1	Active	1758	Erik Gas del 2000, SRL	Services	Male	Legal Person	09 14 2006	Active	Unknown	DISTRITO NACIONAL
711	Administradora de Riesgos de Salud para los Maestros	Purchases Below the Threshold	ordinary process	30000	32600	2600	07 20 2020	07 21 2020	1	Closed	1758	Erik Gas del 2000, SRL	Goods	Male	Legal Person	09 14 2006	Active	Unknown	DISTRITO NACIONAL
940	Biblioteca Nacional Pedro Henríquez Ureña	Price Comparison	ordinary process	1170000	1170000	0	07 15 2020	08 4 2020	20	Active	1758	Erik Gas del 2000, SRL	Goods	Male	Legal Person	09 14 2006	Active	Unknown	DISTRITO NACIONAL
997	Caja de Ahorros Para Obreros y Monte de Piedad	Minor Purchases	ordinary process	450000	450000	0	08 5 2020	08 10 2020	5	Closed	1758	Erik Gas del 2000, SRL	Services	Male	Legal Person	09 14 2006	Active	Unknown	DISTRITO NACIONAL
814	Dirección General de Cine	Purchases Below the Threshold	ordinary process	147000	156200	9200	09 28 2020	09 28 2020	0	Closed	1758	Erik Gas del 2000, SRL	Goods	Male	Legal Person	09 14 2006	Active	Unknown	DISTRITO NACIONAL
954	Orquesta Sinfónica Nacional	Purchases Below the Threshold	ordinary process	21000	21000	0	10 12 2020	10 13 2020	1	Closed	1758	Erik Gas del 2000, SRL	Goods	Male	Legal Person	09 14 2006	Active	Unknown	DISTRITO NACIONAL
253	DIRECCION GENERAL DE MINERIA	Purchases Below the Threshold	ordinary process	8400	8399.76	-0.24	10 13 2020	10 14 2020	1	Active	1758	Erik Gas del 2000, SRL	Services	Male	Legal Person	09 14 2006	Active	Unknown	DISTRITO NACIONAL
814	Dirección General de Cine	Purchases Below the Threshold	ordinary process	64000	64000	0	11 19 2020	11 20 2020	1	Closed	1758	Erik Gas del 2000, SRL	Services	Male	Legal Person	09 14 2006	Active	Unknown	DISTRITO NACIONAL
264	MINISTERIO DE EDUCACION SUPERIOR, CIENCIA Y TECNOLOGIA	Minor Purchases	ordinary process	808500	805900	-2600	12 14 2020	01 8 2021	25	In edition	1758	Erik Gas del 2000, SRL	Services	Male	Legal Person	09 14 2006	Active	Unknown	DISTRITO NACIONAL
839	Instituto de Desarrollo y Crédito Cooperativo	Purchases Below the Threshold	ordinary process	138000	138000	0	12 31 2020	12 31 2020	0	Active	1758	Erik Gas del 2000, SRL	Goods	Male	Legal Person	09 14 2006	Active	Unknown	DISTRITO NACIONAL
839	Instituto de Desarrollo y Crédito Cooperativo	Purchases Below the Threshold	ordinary process	147000	147000	0	12 31 2020	12 31 2020	0	Active	1758	Erik Gas del 2000, SRL	Goods	Male	Legal Person	09 14 2006	Active	Unknown	DISTRITO NACIONAL
222	Tesorería Nacional	Price Comparison	ordinary process	2400000	2400000	0	01 15 2021	02 4 2021	20	Closed	1758	Erik Gas del 2000, SRL	Goods	Male	Legal Person	09 14 2006	Active	Unknown	DISTRITO NACIONAL
814	Dirección General de Cine	Purchases Below the Threshold	ordinary process	17540	19030	1490	02 22 2021	02 22 2021	0	Closed	1758	Erik Gas del 2000, SRL	Goods	Male	Legal Person	09 14 2006	Active	Unknown	DISTRITO NACIONAL
954	Orquesta Sinfónica Nacional	Purchases Below the Threshold	ordinary process	21000	21000	0	03 3 2021	03 8 2021	5	Closed	1758	Erik Gas del 2000, SRL	Goods	Male	Legal Person	09 14 2006	Active	Unknown	DISTRITO NACIONAL
814	Dirección General de Cine	Purchases Below the Threshold	ordinary process	98750	98750	0	03 10 2021	03 10 2021	0	Active	1758	Erik Gas del 2000, SRL	Services	Male	Legal Person	09 14 2006	Active	Unknown	DISTRITO NACIONAL
138	GOBERNACION DE EDIFICIO. J.P. D.	Price Comparison	ordinary process	2400000	2400000	0	03 19 2021	04 12 2021	24	Active	1758	Erik Gas del 2000, SRL	Goods	Male	Legal Person	09 14 2006	Active	Unknown	DISTRITO NACIONAL
978	Hospital Materno Dr. Reynaldo Almanzar	Minor Purchases	ordinary process	908000	908000	0	03 29 2021	04 1 2021	3	In edition	1758	Erik Gas del 2000, SRL	Goods	Male	Legal Person	09 14 2006	Active	Unknown	DISTRITO NACIONAL
982	Teatro Nacional Eduardo Brito	Minor Purchases	ordinary process	828000	828000	0	04 20 2021	04 26 2021	6	Closed	1758	Erik Gas del 2000, SRL	Goods	Male	Legal Person	09 14 2006	Active	Unknown	DISTRITO NACIONAL
839	Instituto de Desarrollo y Crédito Cooperativo	Minor Purchases	ordinary process	974000	974000	0	05 25 2021	05 28 2021	3	Closed	1758	Erik Gas del 2000, SRL	Goods	Male	Legal Person	09 14 2006	Active	Unknown	DISTRITO NACIONAL
814	Dirección General de Cine	Purchases Below the Threshold	ordinary process	30000	30000	0	06 21 2021	06 21 2021	0	Closed	1758	Erik Gas del 2000, SRL	Goods	Male	Legal Person	09 14 2006	Active	Unknown	DISTRITO NACIONAL
954	Orquesta Sinfónica Nacional	Purchases Below the Threshold	ordinary process	21000	21000	0	07 9 2021	07 23 2021	14	Closed	1758	Erik Gas del 2000, SRL	Goods	Male	Legal Person	09 14 2006	Active	Unknown	DISTRITO NACIONAL
982	Teatro Nacional Eduardo Brito	Minor Purchases	ordinary process	1128000	1128000	0	05 3 2022	05 10 2022	7	Closed	1758	Erik Gas del 2000, SRL	Goods	Male	Legal Person	09 14 2006	Active	Unknown	DISTRITO NACIONAL
224	Dirección General Impuestos Internos	Purchases Below the Threshold	ordinary process	100000	100000	0	06 3 2022	06 3 2022	0	Closed	1758	Erik Gas del 2000, SRL	Services	Male	Legal Person	09 14 2006	Active	Unknown	DISTRITO NACIONAL
839	Instituto de Desarrollo y Crédito Cooperativo	Minor Purchases	ordinary process	300000	300000	0	06 22 2022	06 28 2022	6	Active	1758	Erik Gas del 2000, SRL	Services	Male	Legal Person	09 14 2006	Active	Unknown	DISTRITO NACIONAL
224	Dirección General Impuestos Internos	Purchases Below the Threshold	ordinary process	160000	160000	0	07 5 2022	07 5 2022	0	Closed	1758	Erik Gas del 2000, SRL	Services	Male	Legal Person	09 14 2006	Active	Unknown	DISTRITO NACIONAL
906	Comisión Permanente de Efemérides Patrias	Minor Purchases	ordinary process	650000	650000	0	07 14 2022	07 19 2022	5	Active	1758	Erik Gas del 2000, SRL	Goods	Male	Legal Person	09 14 2006	Active	Unknown	DISTRITO NACIONAL
814	Dirección General de Cine	Purchases Below the Threshold	ordinary process	100056.5	100056.5	0	12 7 2022	12 15 2022	8	Active	1758	Erik Gas del 2000, SRL	Goods	Male	Legal Person	09 14 2006	Active	Unknown	DISTRITO NACIONAL
982	Teatro Nacional Eduardo Brito	Minor Purchases	ordinary process	828000	828000	0	01 23 2023	02 1 2023	9	Closed	1758	Erik Gas del 2000, SRL	Services	Male	Legal Person	09 14 2006	Active	Unknown	DISTRITO NACIONAL
964	Defensor del Pueblo	Purchases Below the Threshold	ordinary process	63000	62999.99	-0.01	02 22 2023	02 22 2023	0	Closed	1758	Erik Gas del 2000, SRL	Services	Male	Legal Person	09 14 2006	Active	Unknown	DISTRITO NACIONAL
982	Teatro Nacional Eduardo Brito	Minor Purchases	ordinary process	852000	852000	0	04 5 2023	04 17 2023	12	Active	1758	Erik Gas del 2000, SRL	Services	Male	Legal Person	09 14 2006	Active	Unknown	DISTRITO NACIONAL
954	Orquesta Sinfónica Nacional	Purchases Below the Threshold	ordinary process	94000	91000	-3000	05 19 2023	06 12 2023	24	Closed	1758	Erik Gas del 2000, SRL	Goods	Male	Legal Person	09 14 2006	Active	Unknown	DISTRITO NACIONAL
906	Comisión Permanente de Efemérides Patrias	Minor Purchases	ordinary process	750000	750000	0	07 5 2023	07 7 2023	2	In edition	1758	Erik Gas del 2000, SRL	Goods	Male	Legal Person	09 14 2006	Active	Unknown	DISTRITO NACIONAL
222	Tesorería Nacional	Purchases Below the Threshold	ordinary process	200000	200000	0	07 14 2023	07 14 2023	0	Cancelled	1758	Erik Gas del 2000, SRL	Unknown	Male	Legal Person	09 14 2006	Active	Unknown	DISTRITO NACIONAL
222	Tesorería Nacional	Purchases Below the Threshold	ordinary process	200000	200000	0	07 14 2023	07 14 2023	0	In edition	1758	Erik Gas del 2000, SRL	Unknown	Male	Legal Person	09 14 2006	Active	Unknown	DISTRITO NACIONAL
691	Corporación Estatal de Radio y Televisión	Exception Processes	air tickets, repairs and fuels	250500	243750	-6750	01 2 2018	01 2 2018	0	Active	61746	Gacerca, SRL	Goods	Male	Legal Person	06 9 2016	Active	Unknown	SANTO DOMINGO
691	Corporación Estatal de Radio y Televisión	Exception Processes	air tickets, repairs and fuels	257250	257250	0	02 8 2018	02 8 2018	0	Approved flow	61746	Gacerca, SRL	Goods	Male	Legal Person	06 9 2016	Active	Unknown	SANTO DOMINGO
691	Corporación Estatal de Radio y Televisión	Exception Processes	air tickets, repairs and fuels	246750	246750	0	03 15 2018	03 16 2018	1	Active	61746	Gacerca, SRL	Goods	Male	Legal Person	06 9 2016	Active	Unknown	SANTO DOMINGO
691	Corporación Estatal de Radio y Televisión	Exception Processes	air tickets, repairs and fuels	260250	260250	0	04 10 2018	04 10 2018	0	Active	61746	Gacerca, SRL	Goods	Male	Legal Person	06 9 2016	Active	Unknown	SANTO DOMINGO
691	Corporación Estatal de Radio y Televisión	Exception Processes	air tickets, repairs and fuels	129500	123550	-5950	04 23 2018	04 23 2018	0	Active	61746	Gacerca, SRL	Goods	Male	Legal Person	06 9 2016	Active	Unknown	SANTO DOMINGO
691	Corporación Estatal de Radio y Televisión	Exception Processes	air tickets, repairs and fuels	74800	70600	-4200	04 24 2018	04 24 2018	0	Active	61746	Gacerca, SRL	Goods	Male	Legal Person	06 9 2016	Active	Unknown	SANTO DOMINGO
691	Corporación Estatal de Radio y Televisión	Exception Processes	air tickets, repairs and fuels	264000	263250	-750	05 7 2018	05 8 2018	1	Active	61746	Gacerca, SRL	Goods	Male	Legal Person	06 9 2016	Active	Unknown	SANTO DOMINGO
691	Corporación Estatal de Radio y Televisión	Exception Processes	air tickets, repairs and fuels	276000	263250	-12750	05 9 2018	05 9 2018	0	Active	61746	Gacerca, SRL	Goods	Male	Legal Person	06 9 2016	Active	Unknown	SANTO DOMINGO
691	Corporación Estatal de Radio y Televisión	Exception Processes	air tickets, repairs and fuels	285000	264750	-20250	06 11 2018	06 11 2018	0	In edition	61746	Gacerca, SRL	Goods	Male	Legal Person	06 9 2016	Active	Unknown	SANTO DOMINGO
691	Corporación Estatal de Radio y Televisión	Exception Processes	air tickets, repairs and fuels	88750	88750	0	07 13 2018	07 16 2018	3	Active	61746	Gacerca, SRL	Goods	Male	Legal Person	06 9 2016	Active	Unknown	SANTO DOMINGO
691	Corporación Estatal de Radio y Televisión	Exception Processes	air tickets, repairs and fuels	285000	269250	-15750	07 16 2018	07 17 2018	1	In edition	61746	Gacerca, SRL	Goods	Male	Legal Person	06 9 2016	Active	Unknown	SANTO DOMINGO
983	Servicio Nacional de Salud	Exception Processes	air tickets, repairs and fuels	3781264.65	3781264.65	0	07 20 2018	07 20 2018	0	Cancelled	61746	Gacerca, SRL	Goods	Male	Legal Person	06 9 2016	Active	Unknown	SANTO DOMINGO
983	Servicio Nacional de Salud	Exception Processes	air tickets, repairs and fuels	3781264.65	2228254.65	-1553010	07 20 2018	07 24 2018	4	Closed	61746	Gacerca, SRL	Goods	Male	Legal Person	06 9 2016	Active	Unknown	SANTO DOMINGO
983	Servicio Nacional de Salud	Exception Processes	air tickets, repairs and fuels	1553010	1553010	0	07 24 2018	07 24 2018	0	Closed	61746	Gacerca, SRL	Goods	Male	Legal Person	06 9 2016	Active	Unknown	SANTO DOMINGO
200	Comedores Económicos	Exception Processes	air tickets, repairs and fuels	730000	730000	0	07 24 2018	07 24 2018	0	Active	61746	Gacerca, SRL	Goods	Male	Legal Person	06 9 2016	Active	Unknown	SANTO DOMINGO
747	Hospital Docente SEMMA	Exception Processes	air tickets, repairs and fuels	186500	172500	-14000	07 25 2018	07 26 2018	1	Approved flow	61746	Gacerca, SRL	Goods	Male	Legal Person	06 9 2016	Active	Unknown	SANTO DOMINGO
691	Corporación Estatal de Radio y Televisión	Exception Processes	air tickets, repairs and fuels	285000	276750	-8250	08 15 2018	08 15 2018	0	Active	61746	Gacerca, SRL	Goods	Male	Legal Person	06 9 2016	Active	Unknown	SANTO DOMINGO
691	Corporación Estatal de Radio y Televisión	Exception Processes	air tickets, repairs and fuels	285000	122150	-162850	08 15 2018	08 17 2018	2	Active	61746	Gacerca, SRL	Goods	Male	Legal Person	06 9 2016	Active	Unknown	SANTO DOMINGO
691	Corporación Estatal de Radio y Televisión	Minor Purchases	ordinary process	300000	293700	-6300	09 7 2018	09 11 2018	4	Active	61746	Gacerca, SRL	Goods	Male	Legal Person	06 9 2016	Active	Unknown	SANTO DOMINGO
691	Corporación Estatal de Radio y Televisión	Minor Purchases	ordinary process	300000	281700	-18300	09 7 2018	09 12 2018	5	Active	61746	Gacerca, SRL	Goods	Male	Legal Person	06 9 2016	Active	Unknown	SANTO DOMINGO
691	Corporación Estatal de Radio y Televisión	Minor Purchases	ordinary process	160000	148640	-11360	09 11 2018	09 14 2018	3	In edition	61746	Gacerca, SRL	Goods	Male	Legal Person	06 9 2016	Active	Unknown	SANTO DOMINGO
747	Hospital Docente SEMMA	Purchases Below the Threshold	ordinary process	117480	112680	-4800	09 14 2018	09 14 2018	0	Active	61746	Gacerca, SRL	Goods	Male	Legal Person	06 9 2016	Active	Unknown	SANTO DOMINGO
691	Corporación Estatal de Radio y Televisión	Price Comparison	ordinary process	2600000	2376400	-223600	10 10 2018	11 8 2018	29	Active	61746	Gacerca, SRL	Goods	Male	Legal Person	06 9 2016	Active	Unknown	SANTO DOMINGO
691	Corporación Estatal de Radio y Televisión	Price Comparison	ordinary process	2068800	1912800	-156000	01 31 2019	02 25 2019	25	Active	61746	Gacerca, SRL	Goods	Male	Legal Person	06 9 2016	Active	Unknown	SANTO DOMINGO
691	Corporación Estatal de Radio y Televisión	Price Comparison	ordinary process	2888000	916980	-1971020	06 25 2019	07 19 2019	24	Active	61746	Gacerca, SRL	Goods	Male	Legal Person	06 9 2016	Active	Unknown	SANTO DOMINGO
691	Corporación Estatal de Radio y Televisión	Price Comparison	ordinary process	2888000	1486140	-1401860	06 25 2019	07 19 2019	24	Active	61746	Gacerca, SRL	Goods	Male	Legal Person	06 9 2016	Active	Unknown	SANTO DOMINGO
691	Corporación Estatal de Radio y Televisión	Price Comparison	ordinary process	2888000	1486140	-1401860	06 25 2019	07 19 2019	24	Cancelled	61746	Gacerca, SRL	Unknown	Male	Legal Person	06 9 2016	Active	Unknown	SANTO DOMINGO
691	Corporación Estatal de Radio y Televisión	Price Comparison	ordinary process	2888000	2533840	-354160	11 12 2019	12 16 2019	34	Active	61746	Gacerca, SRL	Goods	Male	Legal Person	06 9 2016	Active	Unknown	SANTO DOMINGO
1006	Mercados Dominicanos de Abasto Agropecuario	Purchases Below the Threshold	ordinary process	20000	20000	0	02 24 2020	02 26 2020	2	Closed	61746	Gacerca, SRL	Goods	Male	Legal Person	06 9 2016	Active	Unknown	SANTO DOMINGO
1006	Mercados Dominicanos de Abasto Agropecuario	Purchases Below the Threshold	ordinary process	55000	20000	-35000	03 2 2020	03 4 2020	2	Closed	61746	Gacerca, SRL	Goods	Male	Legal Person	06 9 2016	Active	Unknown	SANTO DOMINGO
691	Corporación Estatal de Radio y Televisión	Price Comparison	ordinary process	1862000	1862000	0	06 5 2020	07 7 2020	32	Active	61746	Gacerca, SRL	Goods	Male	Legal Person	06 9 2016	Active	Unknown	SANTO DOMINGO
1006	Mercados Dominicanos de Abasto Agropecuario	Purchases Below the Threshold	ordinary process	31500	31500	0	02 15 2021	02 22 2021	7	Active	61746	Gacerca, SRL	Goods	Male	Legal Person	06 9 2016	Active	Unknown	SANTO DOMINGO
1006	Mercados Dominicanos de Abasto Agropecuario	Purchases Below the Threshold	ordinary process	32000	32000	0	03 9 2021	03 10 2021	1	Active	61746	Gacerca, SRL	Goods	Male	Legal Person	06 9 2016	Active	Unknown	SANTO DOMINGO
1006	Mercados Dominicanos de Abasto Agropecuario	Purchases Below the Threshold	ordinary process	36000	36000	0	03 23 2021	03 24 2021	1	Active	61746	Gacerca, SRL	Goods	Male	Legal Person	06 9 2016	Active	Unknown	SANTO DOMINGO
1006	Mercados Dominicanos de Abasto Agropecuario	Purchases Below the Threshold	ordinary process	34000	34000	0	04 12 2021	04 13 2021	1	Active	61746	Gacerca, SRL	Goods	Male	Legal Person	06 9 2016	Active	Unknown	SANTO DOMINGO
1006	Mercados Dominicanos de Abasto Agropecuario	Purchases Below the Threshold	ordinary process	33000	33000	0	04 29 2021	05 5 2021	6	Active	61746	Gacerca, SRL	Goods	Male	Legal Person	06 9 2016	Active	Unknown	SANTO DOMINGO
1006	Mercados Dominicanos de Abasto Agropecuario	Purchases Below the Threshold	ordinary process	29500	29500	0	05 18 2021	05 20 2021	2	Active	61746	Gacerca, SRL	Goods	Male	Legal Person	06 9 2016	Active	Unknown	SANTO DOMINGO
1006	Mercados Dominicanos de Abasto Agropecuario	Purchases Below the Threshold	ordinary process	32500	32500	0	06 8 2021	06 8 2021	0	Closed	61746	Gacerca, SRL	Goods	Male	Legal Person	06 9 2016	Active	Unknown	SANTO DOMINGO
1006	Mercados Dominicanos de Abasto Agropecuario	Purchases Below the Threshold	ordinary process	32500	32500	0	06 17 2021	06 18 2021	1	Closed	61746	Gacerca, SRL	Goods	Male	Legal Person	06 9 2016	Active	Unknown	SANTO DOMINGO
1006	Mercados Dominicanos de Abasto Agropecuario	Purchases Below the Threshold	ordinary process	30000	30000	0	07 1 2021	07 2 2021	1	Active	61746	Gacerca, SRL	Goods	Male	Legal Person	06 9 2016	Active	Unknown	SANTO DOMINGO
1006	Mercados Dominicanos de Abasto Agropecuario	Purchases Below the Threshold	ordinary process	25000	25000	0	07 21 2021	07 22 2021	1	Active	61746	Gacerca, SRL	Goods	Male	Legal Person	06 9 2016	Active	Unknown	SANTO DOMINGO
1006	Mercados Dominicanos de Abasto Agropecuario	Purchases Below the Threshold	ordinary process	29000	29000	0	08 3 2021	08 3 2021	0	Active	61746	Gacerca, SRL	Goods	Male	Legal Person	06 9 2016	Active	Unknown	SANTO DOMINGO
1006	Mercados Dominicanos de Abasto Agropecuario	Minor Purchases	ordinary process	500000	500000	0	07 22 2022	07 28 2022	6	Active	61746	Gacerca, SRL	Goods	Male	Legal Person	06 9 2016	Active	Unknown	SANTO DOMINGO
1006	Mercados Dominicanos de Abasto Agropecuario	Minor Purchases	ordinary process	600000	600000	0	04 17 2023	04 20 2023	3	Active	61746	Gacerca, SRL	Goods	Male	Legal Person	06 9 2016	Active	Unknown	SANTO DOMINGO
632	Despacho de la Primera Dama	Exception Processes	Science, art and monuments restoration	5838750	6889725	1050975	01 2 2018	01 2 2018	0	Active	7643	Skene, SRL	Services	Male	Legal Person	12 4 2007	Active	Small company	DISTRITO NACIONAL
632	Despacho de la Primera Dama	Exception Processes	Science, art and monuments restoration	704460	704460	0	02 9 2018	02 9 2018	0	Active	7643	Skene, SRL	Services	Male	Legal Person	12 4 2007	Active	Small company	DISTRITO NACIONAL
632	Despacho de la Primera Dama	Purchases Below the Threshold	ordinary process	119800	119770	-30	02 12 2018	02 12 2018	0	Active	7643	Skene, SRL	Services	Male	Legal Person	12 4 2007	Active	Small company	DISTRITO NACIONAL
581	Instituto Nacional de formación Técnico Profesional	Exception Processes	Science, art and monuments restoration	2775360	2775360	0	03 5 2018	06 28 2018	115	Closed	7643	Skene, SRL	Services	Male	Legal Person	12 4 2007	Active	Small company	DISTRITO NACIONAL
632	Despacho de la Primera Dama	Exception Processes	Science, art and monuments restoration	809126	809126	0	04 6 2018	04 6 2018	0	Approved flow	7643	Skene, SRL	Services	Male	Legal Person	12 4 2007	Active	Small company	DISTRITO NACIONAL
632	Despacho de la Primera Dama	Exception Processes	Science, art and monuments restoration	7838516	7838516.001	0.001	04 18 2018	04 18 2018	0	Active	7643	Skene, SRL	Services	Male	Legal Person	12 4 2007	Active	Small company	DISTRITO NACIONAL
632	Despacho de la Primera Dama	Exception Processes	Science, art and monuments restoration	7718763.5	7718763.5	0	05 16 2018	05 16 2018	0	Approved flow	7643	Skene, SRL	Services	Male	Legal Person	12 4 2007	Active	Small company	DISTRITO NACIONAL
632	Despacho de la Primera Dama	Exception Processes	Science, art and monuments restoration	744875	744875	0	06 12 2018	06 20 2018	8	Active	7643	Skene, SRL	Services	Male	Legal Person	12 4 2007	Active	Small company	DISTRITO NACIONAL
225	Ministerio de Deportes, Educación Física y Recreación	Minor Purchases	ordinary process	255000	295944	40944	07 26 2018	08 1 2018	6	Closed	7643	Skene, SRL	Services	Male	Legal Person	12 4 2007	Active	Small company	DISTRITO NACIONAL
632	Despacho de la Primera Dama	Purchases Below the Threshold	ordinary process	15000	14750	-250	08 7 2018	08 7 2018	0	Active	7643	Skene, SRL	Services	Male	Legal Person	12 4 2007	Active	Small company	DISTRITO NACIONAL
632	Despacho de la Primera Dama	Exception Processes	Science, art and monuments restoration	1061528	1061528	0	09 4 2018	09 4 2018	0	Closed	7643	Skene, SRL	Services	Male	Legal Person	12 4 2007	Active	Small company	DISTRITO NACIONAL
632	Despacho de la Primera Dama	Purchases Below the Threshold	ordinary process	36108	36108	0	09 19 2018	09 19 2018	0	Active	7643	Skene, SRL	Services	Male	Legal Person	12 4 2007	Active	Small company	DISTRITO NACIONAL
632	Despacho de la Primera Dama	Exception Processes	Science, art and monuments restoration	911255	911255	0	09 26 2018	09 26 2018	0	Closed	7643	Skene, SRL	Services	Male	Legal Person	12 4 2007	Active	Small company	DISTRITO NACIONAL
581	Instituto Nacional de formación Técnico Profesional	Price Comparison	ordinary process	3800000	3832345	32345	10 17 2018	11 12 2018	26	Closed	7643	Skene, SRL	Goods	Male	Legal Person	12 4 2007	Active	Small company	DISTRITO NACIONAL
581	Instituto Nacional de formación Técnico Profesional	Minor Purchases	ordinary process	901800	458430	-443370	11 19 2018	11 27 2018	8	Closed	7643	Skene, SRL	Services	Male	Legal Person	12 4 2007	Active	Small company	DISTRITO NACIONAL
581	Instituto Nacional de formación Técnico Profesional	Minor Purchases	ordinary process	901800	835440	-66360	11 19 2018	11 23 2018	4	Closed	7643	Skene, SRL	Services	Male	Legal Person	12 4 2007	Active	Small company	DISTRITO NACIONAL
632	Despacho de la Primera Dama	Exception Processes	Science, art and monuments restoration	888304	888304	0	12 17 2018	12 17 2018	0	Closed	7643	Skene, SRL	Services	Male	Legal Person	12 4 2007	Active	Small company	DISTRITO NACIONAL
632	Despacho de la Primera Dama	Exception Processes	Science, art and monuments restoration	7205080	7205080	0	01 2 2019	01 2 2019	0	Closed	7643	Skene, SRL	Services	Male	Legal Person	12 4 2007	Active	Small company	DISTRITO NACIONAL
632	Despacho de la Primera Dama	Exception Processes	Science, art and monuments restoration	1779204	1779204	0	02 14 2019	02 14 2019	0	Closed	7643	Skene, SRL	Services	Male	Legal Person	12 4 2007	Active	Small company	DISTRITO NACIONAL
581	Instituto Nacional de formación Técnico Profesional	Minor Purchases	ordinary process	800000	885926.3	85926.3	03 25 2019	04 2 2019	8	Closed	7643	Skene, SRL	Services	Male	Legal Person	12 4 2007	Active	Small company	DISTRITO NACIONAL
632	Despacho de la Primera Dama	Exception Processes	Science, art and monuments restoration	566636	566636	0	04 1 2019	04 1 2019	0	Closed	7643	Skene, SRL	Services	Male	Legal Person	12 4 2007	Active	Small company	DISTRITO NACIONAL
632	Despacho de la Primera Dama	Exception Processes	Science, art and monuments restoration	5470450.5	5470450.5	0	04 24 2019	04 24 2019	0	Closed	7643	Skene, SRL	Services	Male	Legal Person	12 4 2007	Active	Small company	DISTRITO NACIONAL
632	Despacho de la Primera Dama	Purchases Below the Threshold	ordinary process	100000	99946	-54	05 2 2019	05 2 2019	0	Closed	7643	Skene, SRL	Services	Male	Legal Person	12 4 2007	Active	Small company	DISTRITO NACIONAL
632	Despacho de la Primera Dama	Exception Processes	Science, art and monuments restoration	5934810	5934810	0	05 15 2019	05 15 2019	0	Closed	7643	Skene, SRL	Services	Male	Legal Person	12 4 2007	Active	Small company	DISTRITO NACIONAL
581	Instituto Nacional de formación Técnico Profesional	Exception Processes	exclusivity	3482686	3482686.008	0.008	05 16 2019	05 16 2019	0	Closed	7643	Skene, SRL	Services	Male	Legal Person	12 4 2007	Active	Small company	DISTRITO NACIONAL
581	Instituto Nacional de formación Técnico Profesional	Minor Purchases	ordinary process	900000	909780	9780	07 11 2019	07 18 2019	7	Closed	7643	Skene, SRL	Services	Male	Legal Person	12 4 2007	Active	Small company	DISTRITO NACIONAL
632	Despacho de la Primera Dama	Purchases Below the Threshold	ordinary process	111000	110802	-198	08 6 2019	08 6 2019	0	Closed	7643	Skene, SRL	Services	Male	Legal Person	12 4 2007	Active	Small company	DISTRITO NACIONAL
632	Despacho de la Primera Dama	Exception Processes	Science, art and monuments restoration	1919860	1919860	0	09 12 2019	09 12 2019	0	Closed	7643	Skene, SRL	Services	Male	Legal Person	12 4 2007	Active	Small company	DISTRITO NACIONAL
632	Despacho de la Primera Dama	Purchases Below the Threshold	ordinary process	120000	118000	-2000	09 30 2019	09 30 2019	0	Closed	7643	Skene, SRL	Services	Male	Legal Person	12 4 2007	Active	Small company	DISTRITO NACIONAL
581	Instituto Nacional de formación Técnico Profesional	Price Comparison	ordinary process	3800000	3785558	-14442	10 28 2019	12 23 2019	56	Closed	7643	Skene, SRL	Services	Male	Legal Person	12 4 2007	Active	Small company	DISTRITO NACIONAL
632	Despacho de la Primera Dama	Exception Processes	Science, art and monuments restoration	3202520	3202520	0	12 10 2019	12 10 2019	0	Closed	7643	Skene, SRL	Services	Male	Legal Person	12 4 2007	Active	Small company	DISTRITO NACIONAL
632	Despacho de la Primera Dama	Exception Processes	Science, art and monuments restoration	9672460	9672460	0	01 3 2020	01 3 2020	0	Active	7643	Skene, SRL	Services	Male	Legal Person	12 4 2007	Active	Small company	DISTRITO NACIONAL
581	Instituto Nacional de formación Técnico Profesional	Minor Purchases	ordinary process	400000	403560	3560	01 27 2020	02 11 2020	15	Closed	7643	Skene, SRL	Services	Male	Legal Person	12 4 2007	Active	Small company	DISTRITO NACIONAL
977	Dirección General de Bellas Artes	Minor Purchases	ordinary process	350000	295000	-55000	02 7 2020	02 13 2020	6	Active	7643	Skene, SRL	Services	Male	Legal Person	12 4 2007	Active	Small company	DISTRITO NACIONAL
259	Ministerio de Cultura	Price Comparison	ordinary process	4347688	2006000	-2341688	02 6 2020	03 4 2020	27	Closed	7643	Skene, SRL	Services	Male	Legal Person	12 4 2007	Active	Small company	DISTRITO NACIONAL
977	Dirección General de Bellas Artes	Purchases Below the Threshold	ordinary process	100000	99946	-54	11 24 2020	11 25 2020	1	Closed	7643	Skene, SRL	Services	Male	Legal Person	12 4 2007	Active	Small company	DISTRITO NACIONAL
977	Dirección General de Bellas Artes	Minor Purchases	ordinary process	225000	223964	-1036	03 24 2021	03 26 2021	2	In edition	7643	Skene, SRL	Services	Male	Legal Person	12 4 2007	Active	Small company	DISTRITO NACIONAL
977	Dirección General de Bellas Artes	Minor Purchases	ordinary process	250000	250000	0	05 25 2022	05 27 2022	2	Closed	7643	Skene, SRL	Services	Male	Legal Person	12 4 2007	Active	Small company	DISTRITO NACIONAL
954	Orquesta Sinfónica Nacional	Purchases Below the Threshold	ordinary process	164750	164315	-435	07 20 2022	07 20 2022	0	Closed	7643	Skene, SRL	Services	Male	Legal Person	12 4 2007	Active	Small company	DISTRITO NACIONAL
977	Dirección General de Bellas Artes	Minor Purchases	ordinary process	750000	350000.01	-399999.99	08 4 2022	08 9 2022	5	Closed	7643	Skene, SRL	Services	Male	Legal Person	12 4 2007	Active	Small company	DISTRITO NACIONAL
982	Teatro Nacional Eduardo Brito	Minor Purchases	ordinary process	222000	217134.75	-4865.25	09 8 2022	09 16 2022	8	Closed	7643	Skene, SRL	Services	Male	Legal Person	12 4 2007	Active	Small company	DISTRITO NACIONAL
258	Industria Nacional de la Aguja	Purchases Below the Threshold	ordinary process	205700	224000	18300	02 17 2023	02 17 2023	0	Closed	7643	Skene, SRL	Services	Male	Legal Person	12 4 2007	Active	Small company	DISTRITO NACIONAL
207	Programa Supérate	Purchases Below the Threshold	ordinary process	35340	27180.0001	-8159.9999	01 2 2018	01 11 2018	9	Closed	1462	Nas, E.I.R.L	Services	Male	Legal Person	07 4 2006	Active	Unknown	DISTRITO NACIONAL
207	Programa Supérate	Exception Processes	air tickets, repairs and fuels	1000000	1000000	0	01 4 2018	01 4 2018	0	Closed	1462	Nas, E.I.R.L	Services	Male	Legal Person	07 4 2006	Active	Unknown	DISTRITO NACIONAL
258	Industria Nacional de la Aguja	Exception Processes	air tickets, repairs and fuels	249998.32	249998.546	0.226	01 19 2018	01 22 2018	3	Closed	1462	Nas, E.I.R.L	Goods	Male	Legal Person	07 4 2006	Active	Unknown	DISTRITO NACIONAL
7	Dirección General de Contrataciones Públicas	Exception Processes	air tickets, repairs and fuels	425000	225000	-200000	01 24 2018	01 24 2018	0	Closed	1462	Nas, E.I.R.L	Services	Male	Legal Person	07 4 2006	Active	Unknown	DISTRITO NACIONAL
195	Sistema Unico de Beneficiarios (SIUBEN)	Exception Processes	air tickets, repairs and fuels	4270	4270.42	0.42	01 24 2018	01 25 2018	1	Closed	1462	Nas, E.I.R.L	Services	Male	Legal Person	07 4 2006	Active	Unknown	DISTRITO NACIONAL
936	Instituto Nacional de Migración	Exception Processes	air tickets, repairs and fuels	43000	43000	0	01 25 2018	01 25 2018	0	Active	1462	Nas, E.I.R.L	Services	Male	Legal Person	07 4 2006	Active	Unknown	DISTRITO NACIONAL
195	Sistema Unico de Beneficiarios (SIUBEN)	Exception Processes	air tickets, repairs and fuels	190000	190000	0	01 25 2018	01 30 2018	5	Closed	1462	Nas, E.I.R.L	Goods	Male	Legal Person	07 4 2006	Active	Unknown	DISTRITO NACIONAL
207	Programa Supérate	Purchases Below the Threshold	ordinary process	39659.4	46800.0036	7140.6036	01 30 2018	01 31 2018	1	Closed	1462	Nas, E.I.R.L	Goods	Male	Legal Person	07 4 2006	Active	Unknown	DISTRITO NACIONAL
139	Contraloría Gral de la República	Exception Processes	air tickets, repairs and fuels	30000	30000	0	01 31 2018	01 31 2018	0	Closed	1462	Nas, E.I.R.L	Goods	Male	Legal Person	07 4 2006	Active	Unknown	DISTRITO NACIONAL
172	Armada de República Dominicana	Exception Processes	air tickets, repairs and fuels	1464553.6	1464553.6	0	01 31 2018	02 1 2018	1	Active	1462	Nas, E.I.R.L	Goods	Male	Legal Person	07 4 2006	Active	Unknown	DISTRITO NACIONAL
178	Gabinete de Coordinación de Políticas Sociales	Exception Processes	air tickets, repairs and fuels	359998.74	259999.696	-99999.044	02 1 2018	02 1 2018	0	Closed	1462	Nas, E.I.R.L	Goods	Male	Legal Person	07 4 2006	Active	Unknown	DISTRITO NACIONAL
131	Ministerio de Economía, Planificación y Desarrollo	Exception Processes	air tickets, repairs and fuels	1056500	1056500	0	02 2 2018	02 2 2018	0	Closed	1462	Nas, E.I.R.L	Goods	Male	Legal Person	07 4 2006	Active	Unknown	DISTRITO NACIONAL
131	Ministerio de Economía, Planificación y Desarrollo	Exception Processes	air tickets, repairs and fuels	100000	100000	0	02 2 2018	02 2 2018	0	Closed	1462	Nas, E.I.R.L	Goods	Male	Legal Person	07 4 2006	Active	Unknown	DISTRITO NACIONAL
258	Industria Nacional de la Aguja	Exception Processes	air tickets, repairs and fuels	383332.15	249999.792	-133332.358	02 2 2018	02 5 2018	3	In edition	1462	Nas, E.I.R.L	Unknown	Male	Legal Person	07 4 2006	Active	Unknown	DISTRITO NACIONAL
258	Industria Nacional de la Aguja	Exception Processes	air tickets, repairs and fuels	383332.15	249999.792	-133332.358	02 2 2018	02 5 2018	3	Closed	1462	Nas, E.I.R.L	Goods	Male	Legal Person	07 4 2006	Active	Unknown	DISTRITO NACIONAL
207	Programa Supérate	Exception Processes	air tickets, repairs and fuels	1000000	1000000	0	02 2 2018	02 2 2018	0	Closed	1462	Nas, E.I.R.L	Goods	Male	Legal Person	07 4 2006	Active	Unknown	DISTRITO NACIONAL
936	Instituto Nacional de Migración	Exception Processes	air tickets, repairs and fuels	43000	43000	0	02 2 2018	02 2 2018	0	Active	1462	Nas, E.I.R.L	Goods	Male	Legal Person	07 4 2006	Active	Unknown	DISTRITO NACIONAL
2	Dirección Gral de Contabilidad Gubernamental	Exception Processes	air tickets, repairs and fuels	550000	550000	0	02 7 2018	02 7 2018	0	Closed	1462	Nas, E.I.R.L	Goods	Male	Legal Person	07 4 2006	Active	Unknown	DISTRITO NACIONAL
172	Armada de República Dominicana	Exception Processes	air tickets, repairs and fuels	234300	234300	0	02 8 2018	02 8 2018	0	Active	1462	Nas, E.I.R.L	Goods	Male	Legal Person	07 4 2006	Active	Unknown	DISTRITO NACIONAL
2	Dirección Gral de Contabilidad Gubernamental	Exception Processes	air tickets, repairs and fuels	550000	550000	0	02 9 2018	02 9 2018	0	Closed	1462	Nas, E.I.R.L	Goods	Male	Legal Person	07 4 2006	Active	Unknown	DISTRITO NACIONAL
139	Contraloría Gral de la República	Exception Processes	air tickets, repairs and fuels	30000	30000	0	02 20 2018	02 20 2018	0	Closed	1462	Nas, E.I.R.L	Goods	Male	Legal Person	07 4 2006	Active	Unknown	DISTRITO NACIONAL
172	Armada de República Dominicana	Exception Processes	air tickets, repairs and fuels	830760	830760	0	02 21 2018	02 22 2018	1	Active	1462	Nas, E.I.R.L	Goods	Male	Legal Person	07 4 2006	Active	Unknown	DISTRITO NACIONAL
7	Dirección General de Contrataciones Públicas	Exception Processes	air tickets, repairs and fuels	425000	225000	-200000	02 22 2018	02 23 2018	1	Closed	1462	Nas, E.I.R.L	Services	Male	Legal Person	07 4 2006	Active	Unknown	DISTRITO NACIONAL
172	Armada de República Dominicana	Exception Processes	air tickets, repairs and fuels	1677313.84	1677313.84	0	03 1 2018	03 1 2018	0	Active	1462	Nas, E.I.R.L	Goods	Male	Legal Person	07 4 2006	Active	Unknown	DISTRITO NACIONAL
178	Gabinete de Coordinación de Políticas Sociales	Exception Processes	air tickets, repairs and fuels	199998.99	199998.994	0.004	03 2 2018	03 6 2018	4	Closed	1462	Nas, E.I.R.L	Goods	Male	Legal Person	07 4 2006	Active	Unknown	DISTRITO NACIONAL
178	Gabinete de Coordinación de Políticas Sociales	Exception Processes	air tickets, repairs and fuels	160000.04	59999.488	-100000.552	03 2 2018	03 6 2018	4	Closed	1462	Nas, E.I.R.L	Goods	Male	Legal Person	07 4 2006	Active	Unknown	DISTRITO NACIONAL
195	Sistema Unico de Beneficiarios (SIUBEN)	Exception Processes	air tickets, repairs and fuels	570000	570000	0	03 2 2018	03 6 2018	4	Closed	1462	Nas, E.I.R.L	Goods	Male	Legal Person	07 4 2006	Active	Unknown	DISTRITO NACIONAL
258	Industria Nacional de la Aguja	Exception Processes	air tickets, repairs and fuels	250001158.5	249999.246	-249751159.3	03 5 2018	03 6 2018	1	Closed	1462	Nas, E.I.R.L	Goods	Male	Legal Person	07 4 2006	Active	Unknown	DISTRITO NACIONAL
936	Instituto Nacional de Migración	Exception Processes	air tickets, repairs and fuels	43000	43000	0	03 6 2018	03 9 2018	3	Active	1462	Nas, E.I.R.L	Goods	Male	Legal Person	07 4 2006	Active	Unknown	DISTRITO NACIONAL
139	Contraloría Gral de la República	Exception Processes	air tickets, repairs and fuels	30000	30000	0	03 9 2018	03 9 2018	0	Closed	1462	Nas, E.I.R.L	Goods	Male	Legal Person	07 4 2006	Active	Unknown	DISTRITO NACIONAL
2	Dirección Gral de Contabilidad Gubernamental	Exception Processes	air tickets, repairs and fuels	550000	550000	0	03 16 2018	03 16 2018	0	Closed	1462	Nas, E.I.R.L	Goods	Male	Legal Person	07 4 2006	Active	Unknown	DISTRITO NACIONAL
178	Gabinete de Coordinación de Políticas Sociales	Exception Processes	air tickets, repairs and fuels	359999.51	260000.244	-99999.266	03 19 2018	03 19 2018	0	Closed	1462	Nas, E.I.R.L	Goods	Male	Legal Person	07 4 2006	Active	Unknown	DISTRITO NACIONAL
886	Comisión para la Readecuación de La Barquita y Entorno.	Exception Processes	air tickets, repairs and fuels	618000	618000	0	03 20 2018	03 20 2018	0	Active	1462	Nas, E.I.R.L	Services	Male	Legal Person	07 4 2006	Active	Unknown	DISTRITO NACIONAL
207	Programa Supérate	Minor Purchases	ordinary process	300000	125000.0013	-174999.9987	03 26 2018	04 23 2018	28	Closed	1462	Nas, E.I.R.L	Services	Male	Legal Person	07 4 2006	Active	Unknown	DISTRITO NACIONAL
178	Gabinete de Coordinación de Políticas Sociales	Exception Processes	air tickets, repairs and fuels	50000.04	50000	-0.04	03 29 2018	03 29 2018	0	Rescinded	1462	Nas, E.I.R.L	Services	Male	Legal Person	07 4 2006	Active	Unknown	DISTRITO NACIONAL
2	Dirección Gral de Contabilidad Gubernamental	Exception Processes	air tickets, repairs and fuels	568050	568050	0	04 3 2018	04 3 2018	0	Closed	1462	Nas, E.I.R.L	Goods	Male	Legal Person	07 4 2006	Active	Unknown	DISTRITO NACIONAL
936	Instituto Nacional de Migración	Exception Processes	air tickets, repairs and fuels	43000	43000	0	04 3 2018	04 3 2018	0	Active	1462	Nas, E.I.R.L	Goods	Male	Legal Person	07 4 2006	Active	Unknown	DISTRITO NACIONAL
258	Industria Nacional de la Aguja	Exception Processes	air tickets, repairs and fuels	316666.81	250000.936	-66665.874	04 5 2018	04 6 2018	1	Closed	1462	Nas, E.I.R.L	Goods	Male	Legal Person	07 4 2006	Active	Unknown	DISTRITO NACIONAL
7	Dirección General de Contrataciones Públicas	Exception Processes	air tickets, repairs and fuels	850000	450000	-400000	04 16 2018	04 17 2018	1	Closed	1462	Nas, E.I.R.L	Services	Male	Legal Person	07 4 2006	Active	Unknown	DISTRITO NACIONAL
195	Sistema Unico de Beneficiarios (SIUBEN)	Exception Processes	air tickets, repairs and fuels	570000	570000	0	04 20 2018	04 25 2018	5	Closed	1462	Nas, E.I.R.L	Goods	Male	Legal Person	07 4 2006	Active	Unknown	DISTRITO NACIONAL
178	Gabinete de Coordinación de Políticas Sociales	Exception Processes	air tickets, repairs and fuels	360000.67	260000.864	-99999.806	04 23 2018	04 24 2018	1	Closed	1462	Nas, E.I.R.L	Goods	Male	Legal Person	07 4 2006	Active	Unknown	DISTRITO NACIONAL
172	Armada de República Dominicana	Exception Processes	air tickets, repairs and fuels	190600	190600	0	04 25 2018	04 26 2018	1	Active	1462	Nas, E.I.R.L	Goods	Male	Legal Person	07 4 2006	Active	Unknown	DISTRITO NACIONAL
178	Gabinete de Coordinación de Políticas Sociales	Purchases Below the Threshold	ordinary process	50000.04	49999.9512	-0.0888	04 26 2018	04 26 2018	0	Closed	1462	Nas, E.I.R.L	Services	Male	Legal Person	07 4 2006	Active	Unknown	DISTRITO NACIONAL
936	Instituto Nacional de Migración	Exception Processes	air tickets, repairs and fuels	43000	43000	0	05 1 2018	05 1 2018	0	Active	1462	Nas, E.I.R.L	Goods	Male	Legal Person	07 4 2006	Active	Unknown	DISTRITO NACIONAL
207	Programa Supérate	Exception Processes	air tickets, repairs and fuels	1000000	1000000	0	05 2 2018	05 2 2018	0	Closed	1462	Nas, E.I.R.L	Services	Male	Legal Person	07 4 2006	Active	Unknown	DISTRITO NACIONAL
2	Dirección Gral de Contabilidad Gubernamental	Exception Processes	air tickets, repairs and fuels	550000	550000	0	05 2 2018	05 2 2018	0	Closed	1462	Nas, E.I.R.L	Goods	Male	Legal Person	07 4 2006	Active	Unknown	DISTRITO NACIONAL
172	Armada de República Dominicana	Exception Processes	air tickets, repairs and fuels	486601.4	486601.398	-0.002	05 8 2018	05 8 2018	0	Active	1462	Nas, E.I.R.L	Goods	Male	Legal Person	07 4 2006	Active	Unknown	DISTRITO NACIONAL
258	Industria Nacional de la Aguja	Exception Processes	air tickets, repairs and fuels	417002.09	274998.336	-142003.754	05 9 2018	05 9 2018	0	Closed	1462	Nas, E.I.R.L	Goods	Male	Legal Person	07 4 2006	Active	Unknown	DISTRITO NACIONAL
178	Gabinete de Coordinación de Políticas Sociales	Exception Processes	air tickets, repairs and fuels	359998.4	259998.592	-99999.808	05 16 2018	05 16 2018	0	Closed	1462	Nas, E.I.R.L	Goods	Male	Legal Person	07 4 2006	Active	Unknown	DISTRITO NACIONAL
172	Armada de República Dominicana	Exception Processes	air tickets, repairs and fuels	483601.4	483601.395	-0.005	05 16 2018	05 16 2018	0	Active	1462	Nas, E.I.R.L	Goods	Male	Legal Person	07 4 2006	Active	Unknown	DISTRITO NACIONAL
195	Sistema Unico de Beneficiarios (SIUBEN)	Exception Processes	air tickets, repairs and fuels	135000	30000	-105000	05 17 2018	05 21 2018	4	Cancelled	1462	Nas, E.I.R.L	Unknown	Male	Legal Person	07 4 2006	Active	Unknown	DISTRITO NACIONAL
195	Sistema Unico de Beneficiarios (SIUBEN)	Exception Processes	air tickets, repairs and fuels	135000	30000	-105000	05 17 2018	05 21 2018	4	Closed	1462	Nas, E.I.R.L	Services	Male	Legal Person	07 4 2006	Active	Unknown	DISTRITO NACIONAL
195	Sistema Unico de Beneficiarios (SIUBEN)	Exception Processes	air tickets, repairs and fuels	135000	35000	-100000	05 17 2018	05 21 2018	4	Closed	1462	Nas, E.I.R.L	Services	Male	Legal Person	07 4 2006	Active	Unknown	DISTRITO NACIONAL
886	Comisión para la Readecuación de La Barquita y Entorno.	Exception Processes	air tickets, repairs and fuels	1099858	1099858	0	05 23 2018	05 23 2018	0	Active	1462	Nas, E.I.R.L	Services	Male	Legal Person	07 4 2006	Active	Unknown	DISTRITO NACIONAL
172	Armada de República Dominicana	Exception Processes	air tickets, repairs and fuels	451049	451049	0	05 29 2018	05 30 2018	1	Active	1462	Nas, E.I.R.L	Goods	Male	Legal Person	07 4 2006	Active	Unknown	DISTRITO NACIONAL
2	Dirección Gral de Contabilidad Gubernamental	Exception Processes	air tickets, repairs and fuels	550000	550000	0	06 1 2018	06 4 2018	3	Closed	1462	Nas, E.I.R.L	Goods	Male	Legal Person	07 4 2006	Active	Unknown	DISTRITO NACIONAL
936	Instituto Nacional de Migración	Purchases Below the Threshold	ordinary process	43000	43000	0	06 1 2018	06 4 2018	3	Active	1462	Nas, E.I.R.L	Goods	Male	Legal Person	07 4 2006	Active	Unknown	DISTRITO NACIONAL
178	Gabinete de Coordinación de Políticas Sociales	Exception Processes	air tickets, repairs and fuels	359999.21	259998.272	-100000.938	06 7 2018	06 7 2018	0	Closed	1462	Nas, E.I.R.L	Goods	Male	Legal Person	07 4 2006	Active	Unknown	DISTRITO NACIONAL
7	Dirección General de Contrataciones Públicas	Price Comparison	ordinary process	3400000	3400000	0	05 29 2018	06 25 2018	27	Closed	1462	Nas, E.I.R.L	Goods	Male	Legal Person	07 4 2006	Active	Unknown	DISTRITO NACIONAL
131	Ministerio de Economía, Planificación y Desarrollo	Exception Processes	air tickets, repairs and fuels	179500	179500	0	06 8 2018	06 8 2018	0	Closed	1462	Nas, E.I.R.L	Goods	Male	Legal Person	07 4 2006	Active	Unknown	DISTRITO NACIONAL
258	Industria Nacional de la Aguja	Exception Processes	air tickets, repairs and fuels	416935.5	275000	-141935.5	06 8 2018	06 8 2018	0	Active	1462	Nas, E.I.R.L	Goods	Male	Legal Person	07 4 2006	Active	Unknown	DISTRITO NACIONAL
258	Industria Nacional de la Aguja	Exception Processes	air tickets, repairs and fuels	416935.5	275000	-141935.5	06 8 2018	06 8 2018	0	Cancelled	1462	Nas, E.I.R.L	Unknown	Male	Legal Person	07 4 2006	Active	Unknown	DISTRITO NACIONAL
258	Industria Nacional de la Aguja	Exception Processes	air tickets, repairs and fuels	416935.5	275000	-141935.5	06 8 2018	06 8 2018	0	Cancelled	1462	Nas, E.I.R.L	Unknown	Male	Legal Person	07 4 2006	Active	Unknown	DISTRITO NACIONAL
207	Programa Supérate	Exception Processes	air tickets, repairs and fuels	1000000	1000000	0	06 8 2018	06 8 2018	0	Closed	1462	Nas, E.I.R.L	Services	Male	Legal Person	07 4 2006	Active	Unknown	DISTRITO NACIONAL
172	Armada de República Dominicana	Exception Processes	air tickets, repairs and fuels	203791.6	203791.6	0	06 13 2018	06 14 2018	1	Active	1462	Nas, E.I.R.L	Goods	Male	Legal Person	07 4 2006	Active	Unknown	DISTRITO NACIONAL
258	Industria Nacional de la Aguja	Exception Processes	air tickets, repairs and fuels	740407.5	200000	-540407.5	06 25 2018	06 25 2018	0	Closed	1462	Nas, E.I.R.L	Goods	Male	Legal Person	07 4 2006	Active	Unknown	DISTRITO NACIONAL
2	Dirección Gral de Contabilidad Gubernamental	Exception Processes	air tickets, repairs and fuels	550000	550000	0	06 26 2018	06 27 2018	1	Closed	1462	Nas, E.I.R.L	Goods	Male	Legal Person	07 4 2006	Active	Unknown	DISTRITO NACIONAL
172	Armada de República Dominicana	Exception Processes	air tickets, repairs and fuels	240317.1	240317.1	0	06 29 2018	06 29 2018	0	Active	1462	Nas, E.I.R.L	Goods	Male	Legal Person	07 4 2006	Active	Unknown	DISTRITO NACIONAL
178	Gabinete de Coordinación de Políticas Sociales	Exception Processes	air tickets, repairs and fuels	299990	199999.998	-99990.002	06 29 2018	06 29 2018	0	Closed	1462	Nas, E.I.R.L	Goods	Male	Legal Person	07 4 2006	Active	Unknown	DISTRITO NACIONAL
178	Gabinete de Coordinación de Políticas Sociales	Exception Processes	air tickets, repairs and fuels	419998.47	419998.47	0	06 29 2018	06 29 2018	0	Closed	1462	Nas, E.I.R.L	Goods	Male	Legal Person	07 4 2006	Active	Unknown	DISTRITO NACIONAL
886	Comisión para la Readecuación de La Barquita y Entorno.	Minor Purchases	ordinary process	618000	618000	0	06 27 2018	07 2 2018	5	Active	1462	Nas, E.I.R.L	Goods	Male	Legal Person	07 4 2006	Active	Unknown	DISTRITO NACIONAL
207	Programa Supérate	Exception Processes	air tickets, repairs and fuels	450000	450000	0	07 3 2018	07 4 2018	1	Closed	1462	Nas, E.I.R.L	Goods	Male	Legal Person	07 4 2006	Active	Unknown	DISTRITO NACIONAL
258	Industria Nacional de la Aguja	Exception Processes	air tickets, repairs and fuels	416985	275000	-141985	07 4 2018	07 4 2018	0	Active	1462	Nas, E.I.R.L	Goods	Male	Legal Person	07 4 2006	Active	Unknown	DISTRITO NACIONAL
131	Ministerio de Economía, Planificación y Desarrollo	Exception Processes	air tickets, repairs and fuels	1314000	1314000	0	07 9 2018	07 9 2018	0	In edition	1462	Nas, E.I.R.L	Goods	Male	Legal Person	07 4 2006	Active	Unknown	DISTRITO NACIONAL
207	Programa Supérate	Exception Processes	air tickets, repairs and fuels	2000000	2000000	0	07 9 2018	07 10 2018	1	Closed	1462	Nas, E.I.R.L	Goods	Male	Legal Person	07 4 2006	Active	Unknown	DISTRITO NACIONAL
936	Instituto Nacional de Migración	Purchases Below the Threshold	ordinary process	43000	43000	0	07 11 2018	07 12 2018	1	Closed	1462	Nas, E.I.R.L	Goods	Male	Legal Person	07 4 2006	Active	Unknown	DISTRITO NACIONAL
172	Armada de República Dominicana	Exception Processes	air tickets, repairs and fuels	476604.1	476604.1	0	07 13 2018	07 13 2018	0	Active	1462	Nas, E.I.R.L	Goods	Male	Legal Person	07 4 2006	Active	Unknown	DISTRITO NACIONAL
178	Gabinete de Coordinación de Políticas Sociales	Exception Processes	air tickets, repairs and fuels	206250	206250	0	07 13 2018	07 13 2018	0	Closed	1462	Nas, E.I.R.L	Services	Male	Legal Person	07 4 2006	Active	Unknown	DISTRITO NACIONAL
224	Dirección General Impuestos Internos	Exception Processes	air tickets, repairs and fuels	100000	100000	0	07 13 2018	07 18 2018	5	Closed	1462	Nas, E.I.R.L	Services	Male	Legal Person	07 4 2006	Active	Unknown	DISTRITO NACIONAL
178	Gabinete de Coordinación de Políticas Sociales	Exception Processes	air tickets, repairs and fuels	359999.19	259999.67	-99999.52	07 13 2018	07 13 2018	0	Closed	1462	Nas, E.I.R.L	Goods	Male	Legal Person	07 4 2006	Active	Unknown	DISTRITO NACIONAL
131	Ministerio de Economía, Planificación y Desarrollo	Exception Processes	air tickets, repairs and fuels	177500	177500	0	07 19 2018	07 19 2018	0	Active	1462	Nas, E.I.R.L	Goods	Male	Legal Person	07 4 2006	Active	Unknown	DISTRITO NACIONAL
207	Programa Supérate	Minor Purchases	ordinary process	237780	249400.0021	11620.0021	07 18 2018	07 30 2018	12	Closed	1462	Nas, E.I.R.L	Services	Male	Legal Person	07 4 2006	Active	Unknown	DISTRITO NACIONAL
2	Dirección Gral de Contabilidad Gubernamental	Exception Processes	air tickets, repairs and fuels	650000	650000	0	07 24 2018	07 25 2018	1	Closed	1462	Nas, E.I.R.L	Goods	Male	Legal Person	07 4 2006	Active	Unknown	DISTRITO NACIONAL
178	Gabinete de Coordinación de Políticas Sociales	Exception Processes	air tickets, repairs and fuels	1920000	1520000	-400000	07 31 2018	07 31 2018	0	Rescinded	1462	Nas, E.I.R.L	Goods	Male	Legal Person	07 4 2006	Active	Unknown	DISTRITO NACIONAL
178	Gabinete de Coordinación de Políticas Sociales	Exception Processes	air tickets, repairs and fuels	1920000	1520000	-400000	07 31 2018	07 31 2018	0	Cancelled	1462	Nas, E.I.R.L	Unknown	Male	Legal Person	07 4 2006	Active	Unknown	DISTRITO NACIONAL
131	Ministerio de Economía, Planificación y Desarrollo	Exception Processes	air tickets, repairs and fuels	1227500	1227500	0	08 1 2018	08 1 2018	0	Active	1462	Nas, E.I.R.L	Services	Male	Legal Person	07 4 2006	Active	Unknown	DISTRITO NACIONAL
131	Ministerio de Economía, Planificación y Desarrollo	Exception Processes	air tickets, repairs and fuels	2711250	2711250	0	08 8 2018	08 8 2018	0	In edition	1462	Nas, E.I.R.L	Goods	Male	Legal Person	07 4 2006	Active	Unknown	DISTRITO NACIONAL
936	Instituto Nacional de Migración	Purchases Below the Threshold	ordinary process	43000	43000	0	08 8 2018	08 9 2018	1	Closed	1462	Nas, E.I.R.L	Goods	Male	Legal Person	07 4 2006	Active	Unknown	DISTRITO NACIONAL
258	Industria Nacional de la Aguja	Exception Processes	air tickets, repairs and fuels	416880.5	275000	-141880.5	08 9 2018	08 9 2018	0	Closed	1462	Nas, E.I.R.L	Goods	Male	Legal Person	07 4 2006	Active	Unknown	DISTRITO NACIONAL
[truncated: 329,343 more rows]
